# Supplementary material for: An end-to-end generalizable deep learning framework to comprehensively analyze transcriptional regulation
Source: Research Square preprint supplement (doi:10.21203/rs.3.rs-7242733/v1), 2025-08-18
Supplement: Supplementary file 1 [file 5259a81b6d07951e2754bcff.docx]

**Supplement Figure**


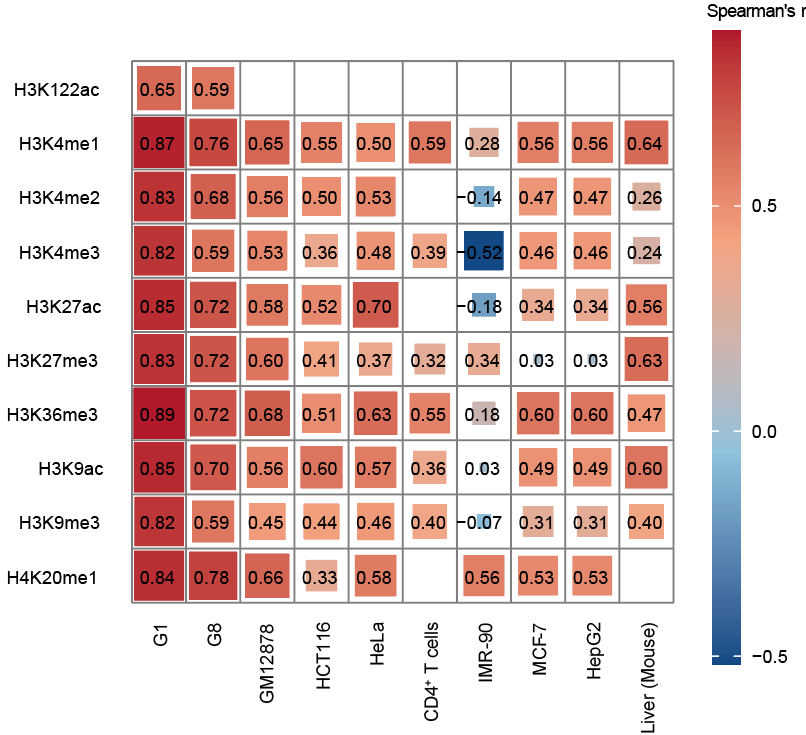


**Supplementary Figure S1: Cross-cell line Spearman correlation of BioSeq2Seq predictions.**

**
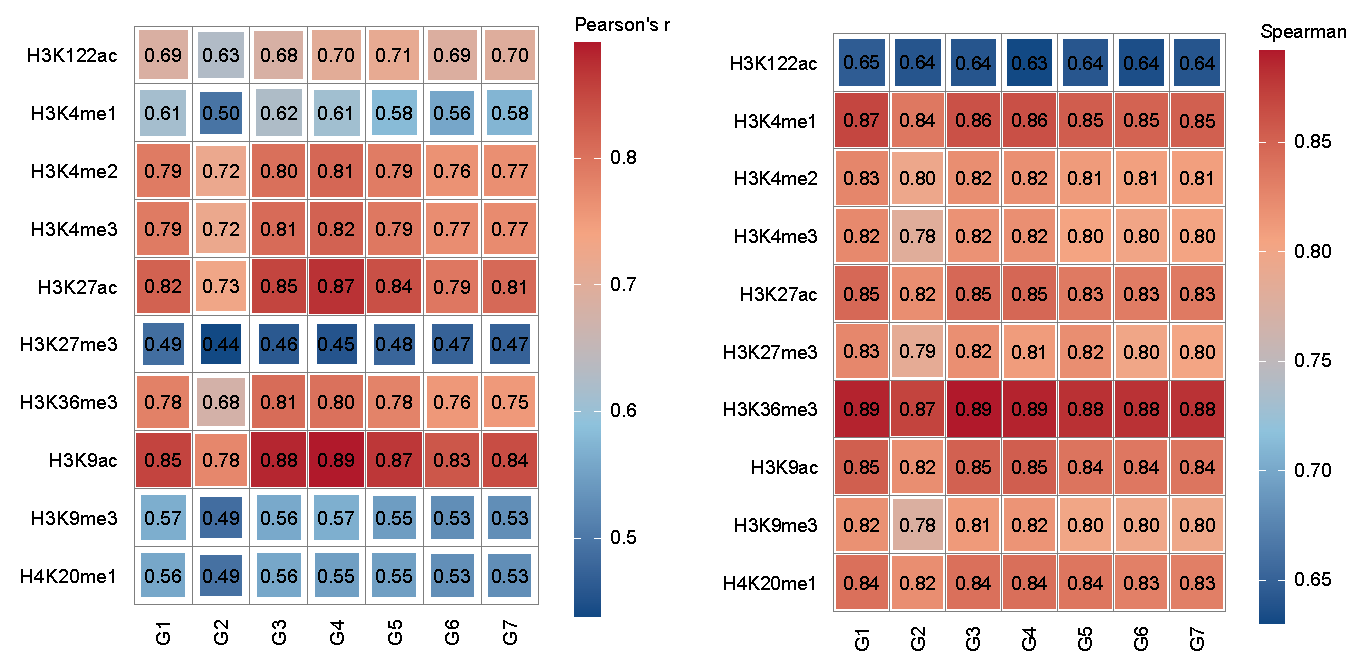
**

**Supplementary Figure S2: Pearson and Spearman correlation on chromosome 22.**

**
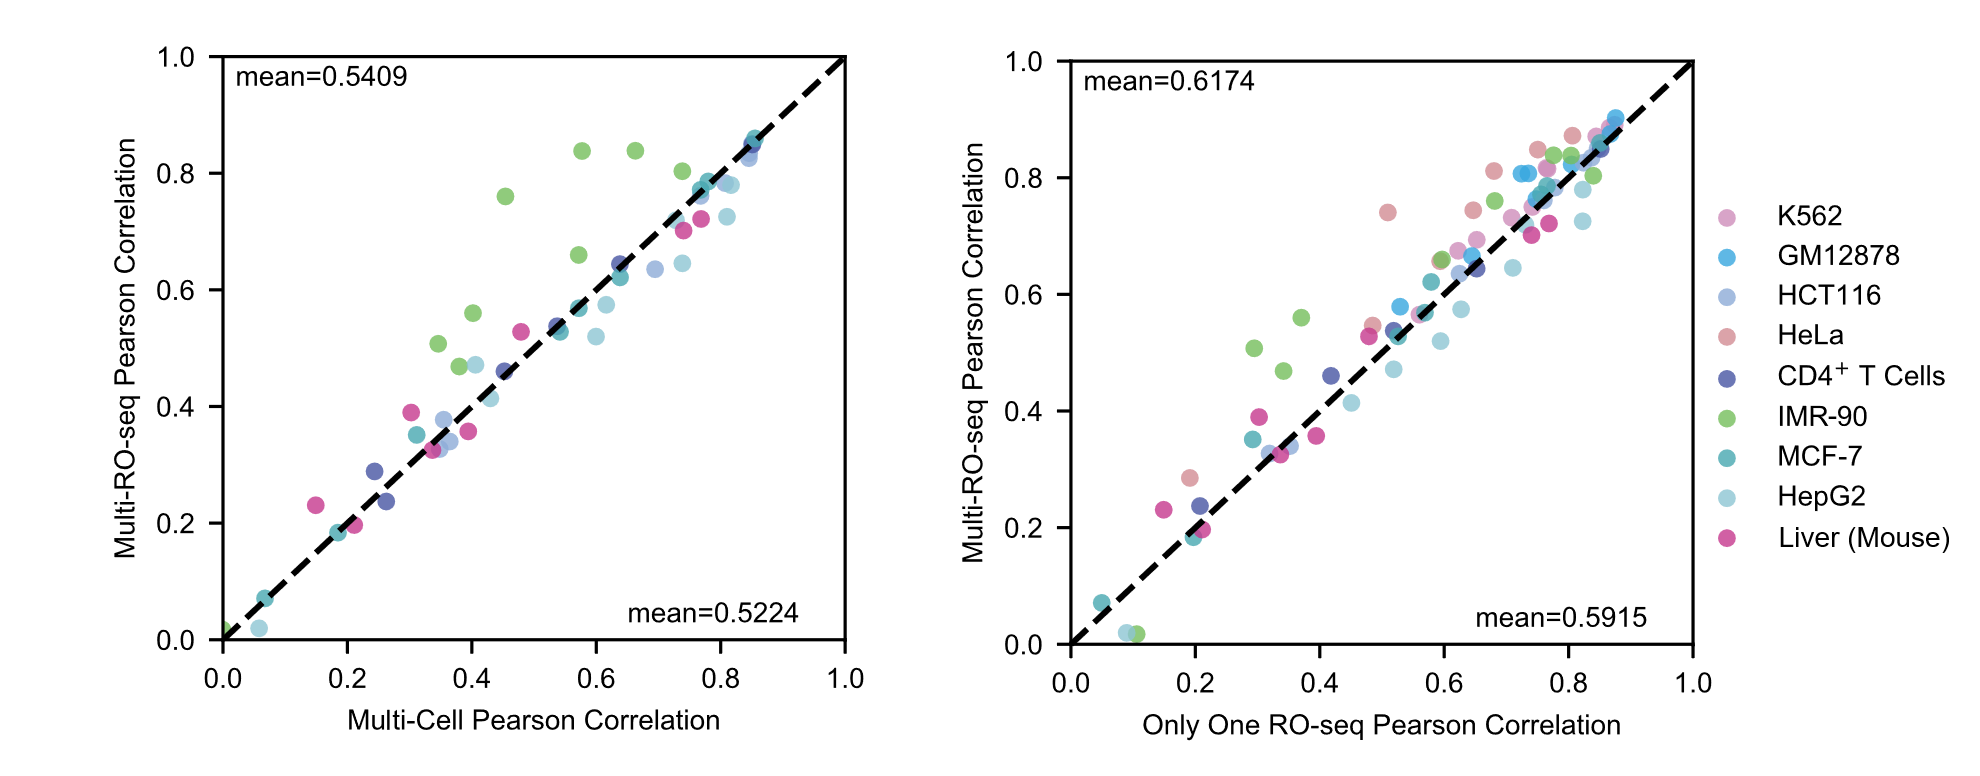
**

**Supplementary Figure S3: Comparison among multi-RO-seq model, multi-cell model, and G1-only model.**


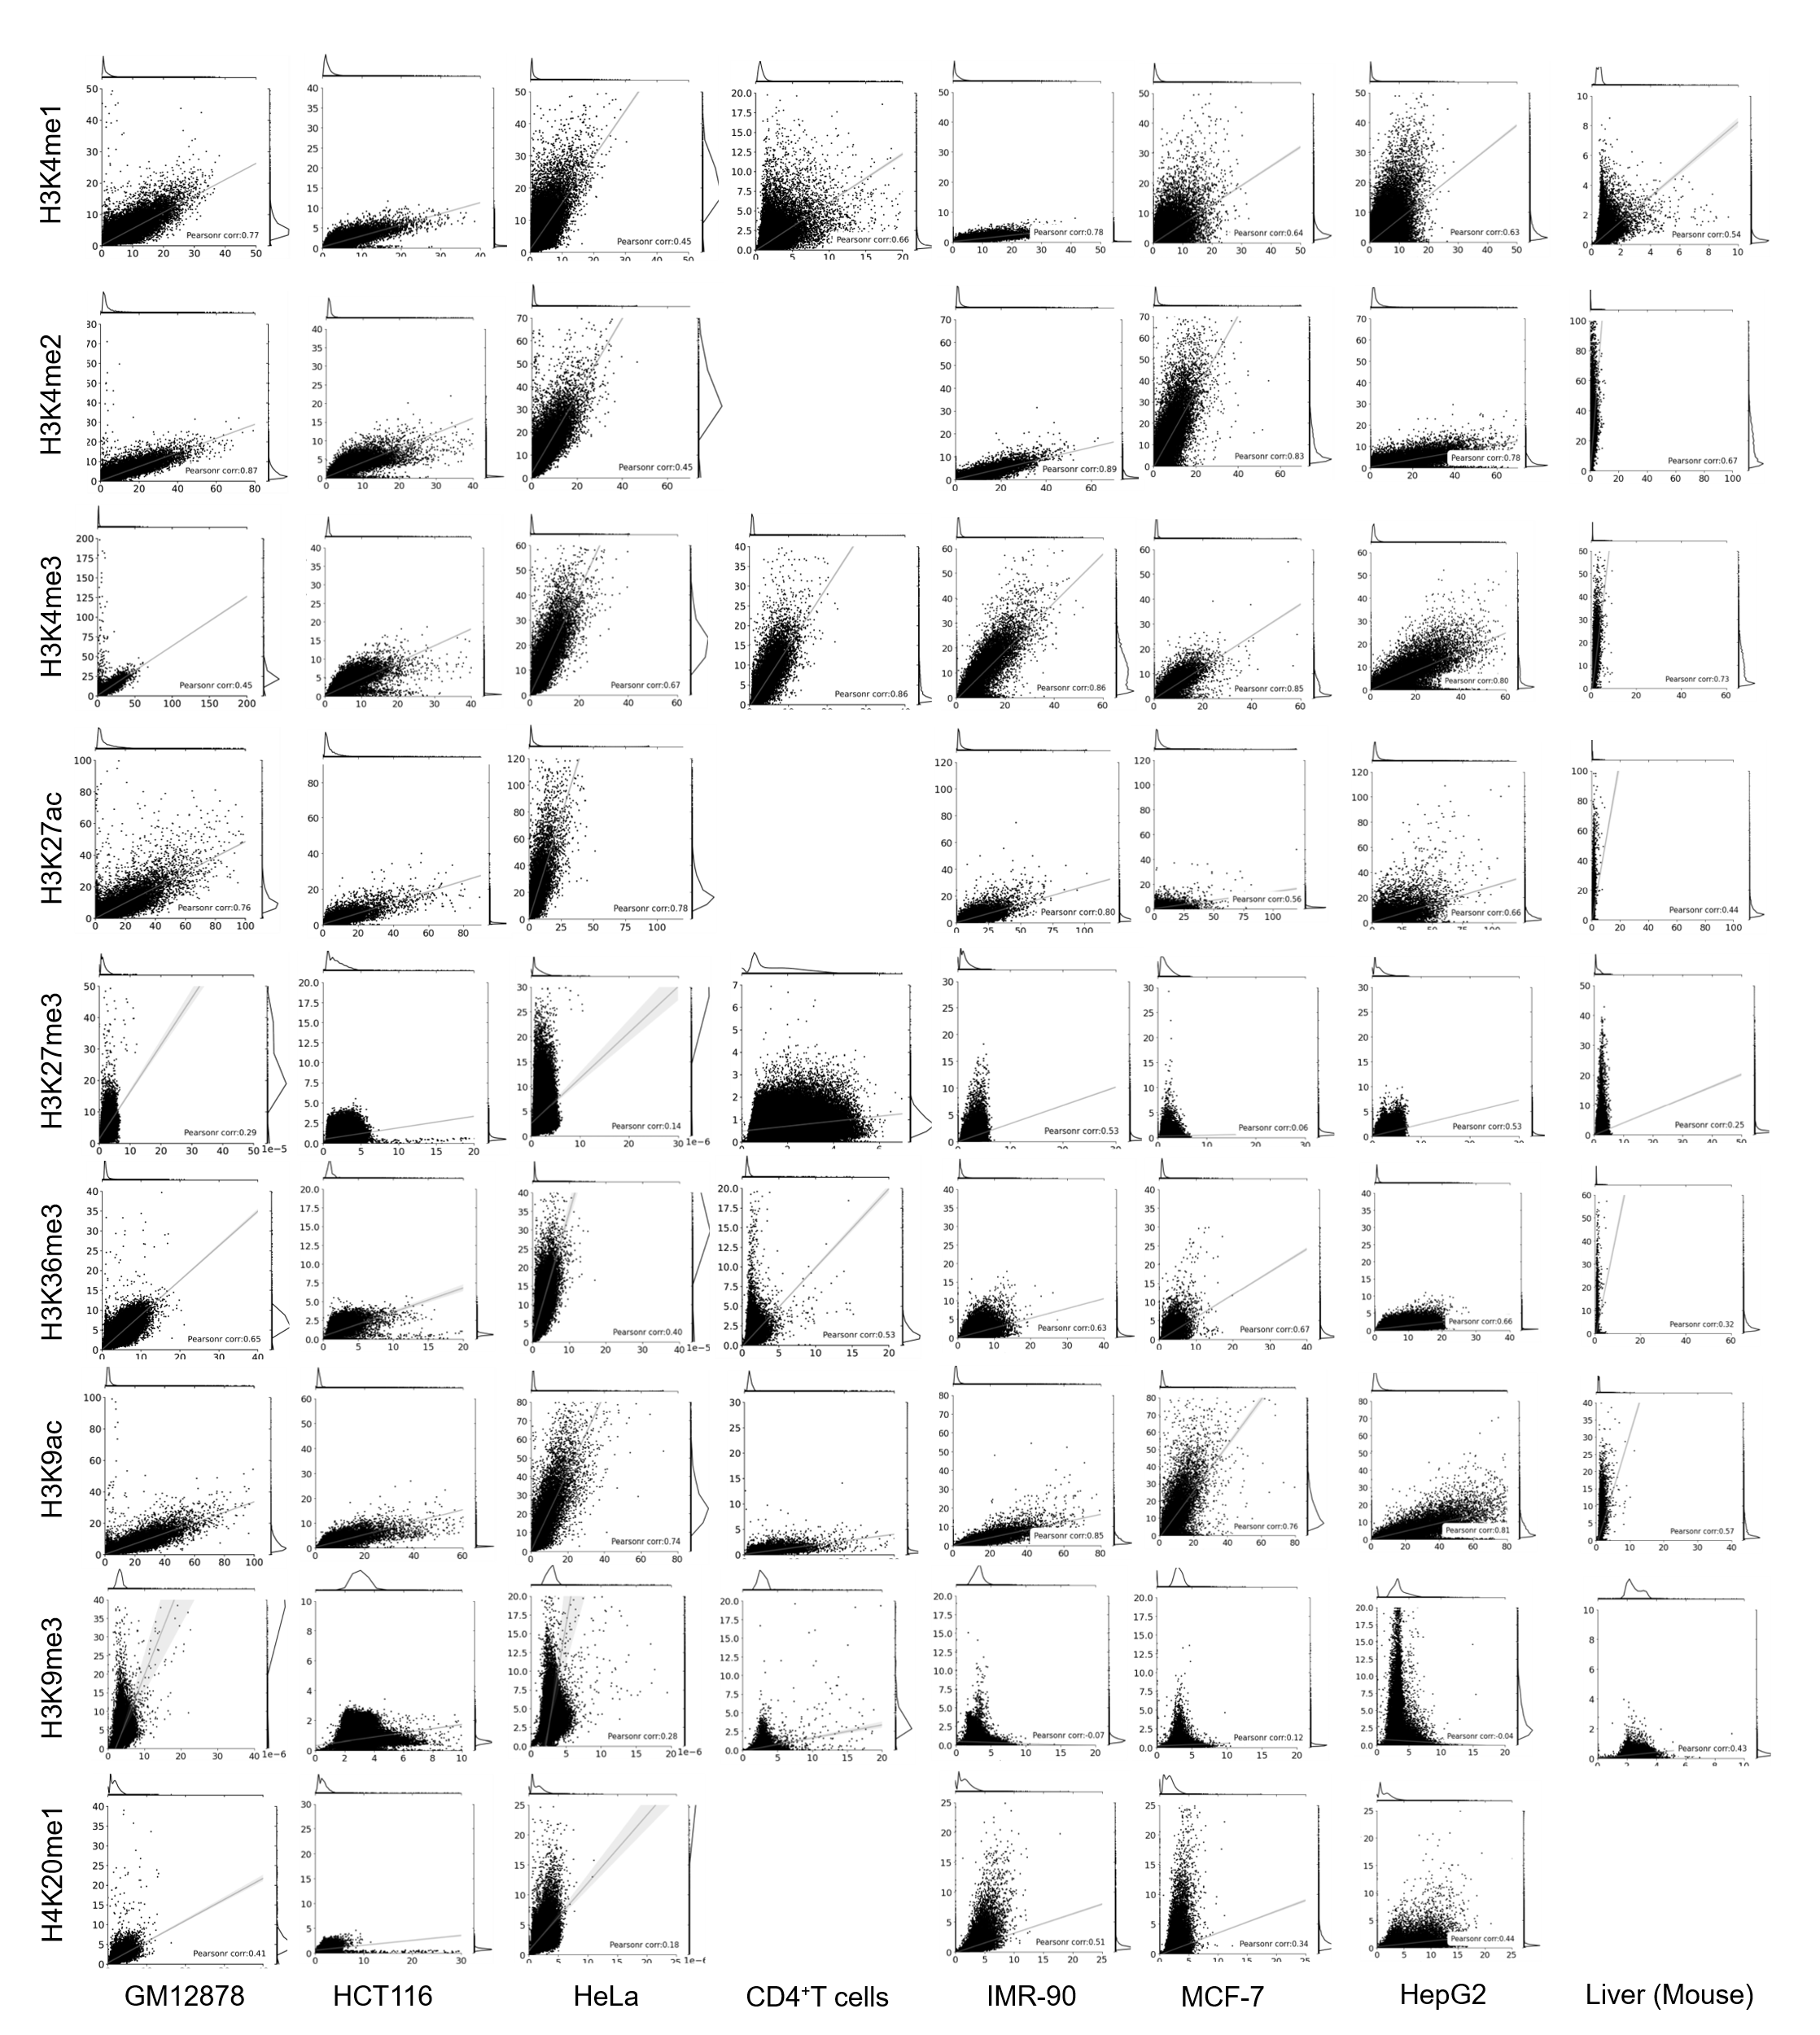


**Supplementary Figure S4: Data distribution of predicted and experimental signals.** Each point in the plot represents a 10 kb genomic region. Blank regions in the plot correspond to regions lacking ChIP-seq coverage.


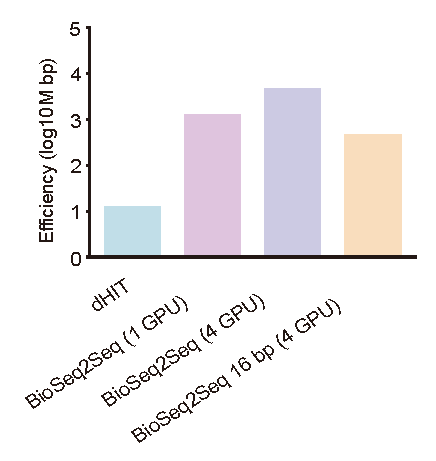


**Supplementary Figure S5: Comparison of computational efficiency between BioSeq2Seq and dHIT.** This figure compares the efficiency of dHIT, BioSeq2Seq (with 1 GPU, 4 GPUs) and BioSeq2Seq with 16 bp resolution. Log10 scaling is applied to accommodate the wide range of values and enable visual comparison across models. Efficiency is measured by the amount of genomic data (in megabase pairs) can be processed per hour.

**
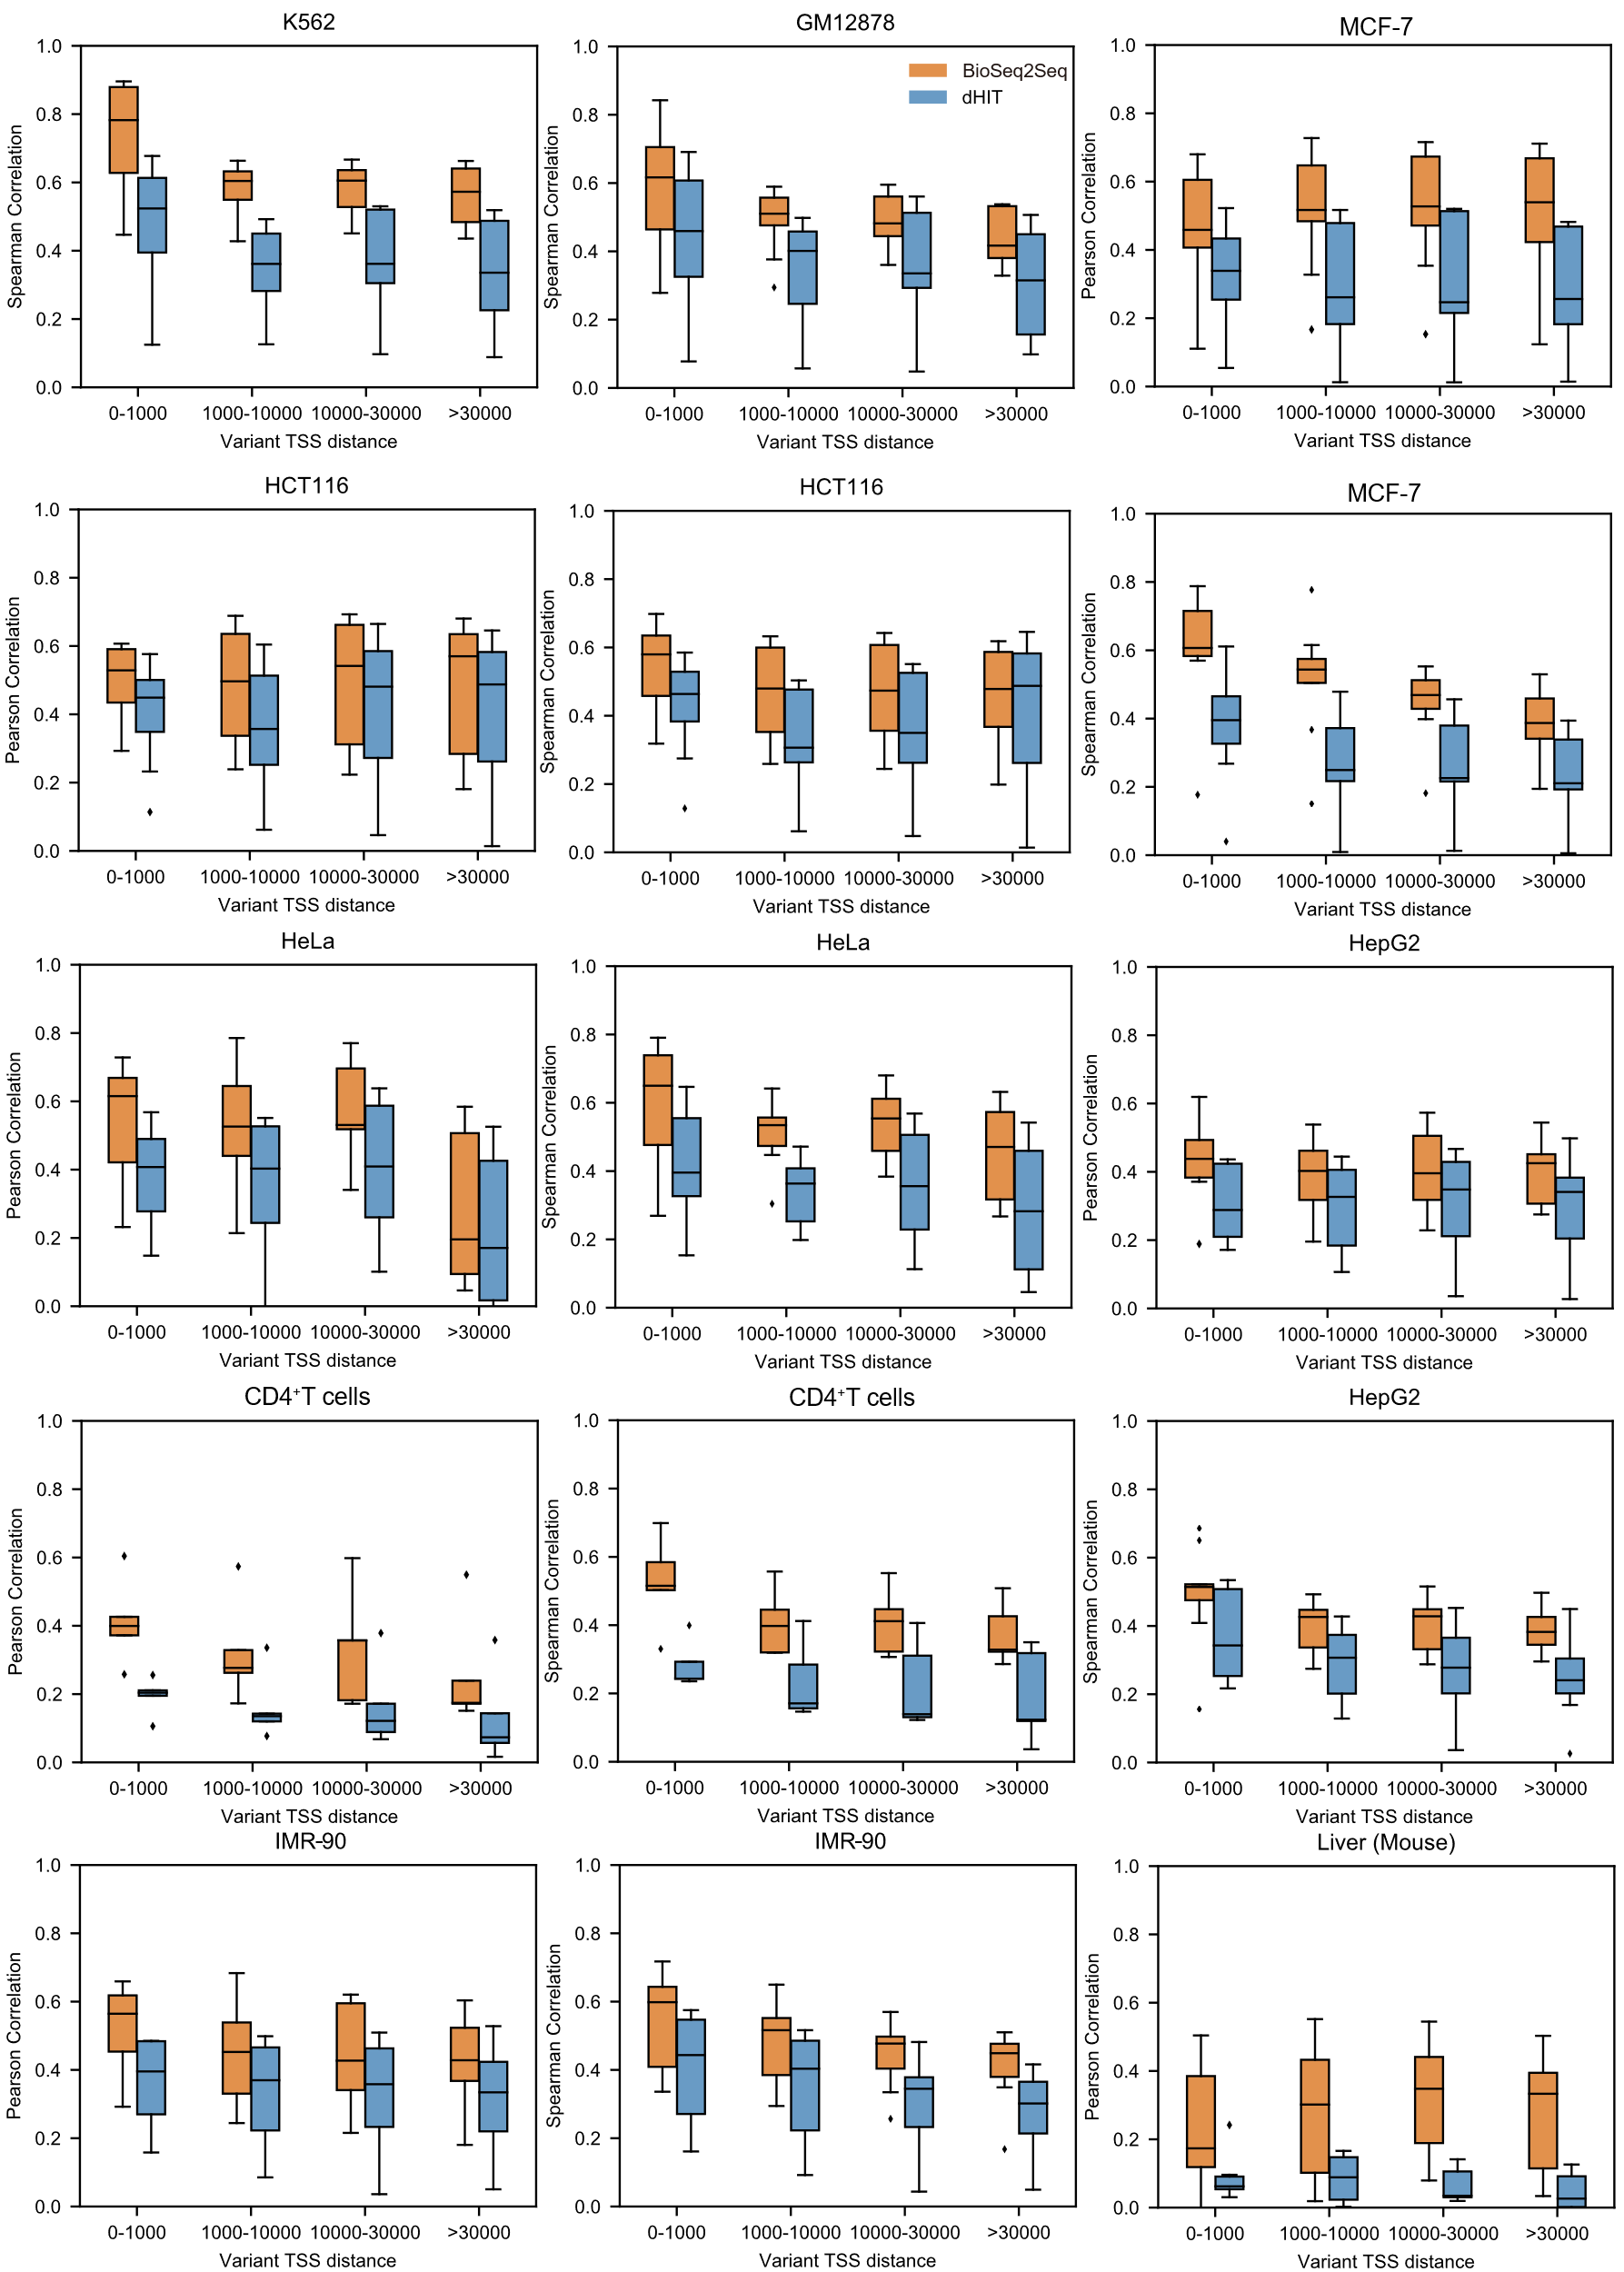
**

**Supplementary Figure S6: Performance near histone modification peaks stratified by distance to TSS.** Histone peaks are categorized based on their distance from the nearest transcription start site (TSS) into four bins: <1,000 bp, 1,000–10,000 bp, 10,000–30,000 bp, and >30,000 bp. Pearson correlation is computed separately for each distance category to assess prediction performance.


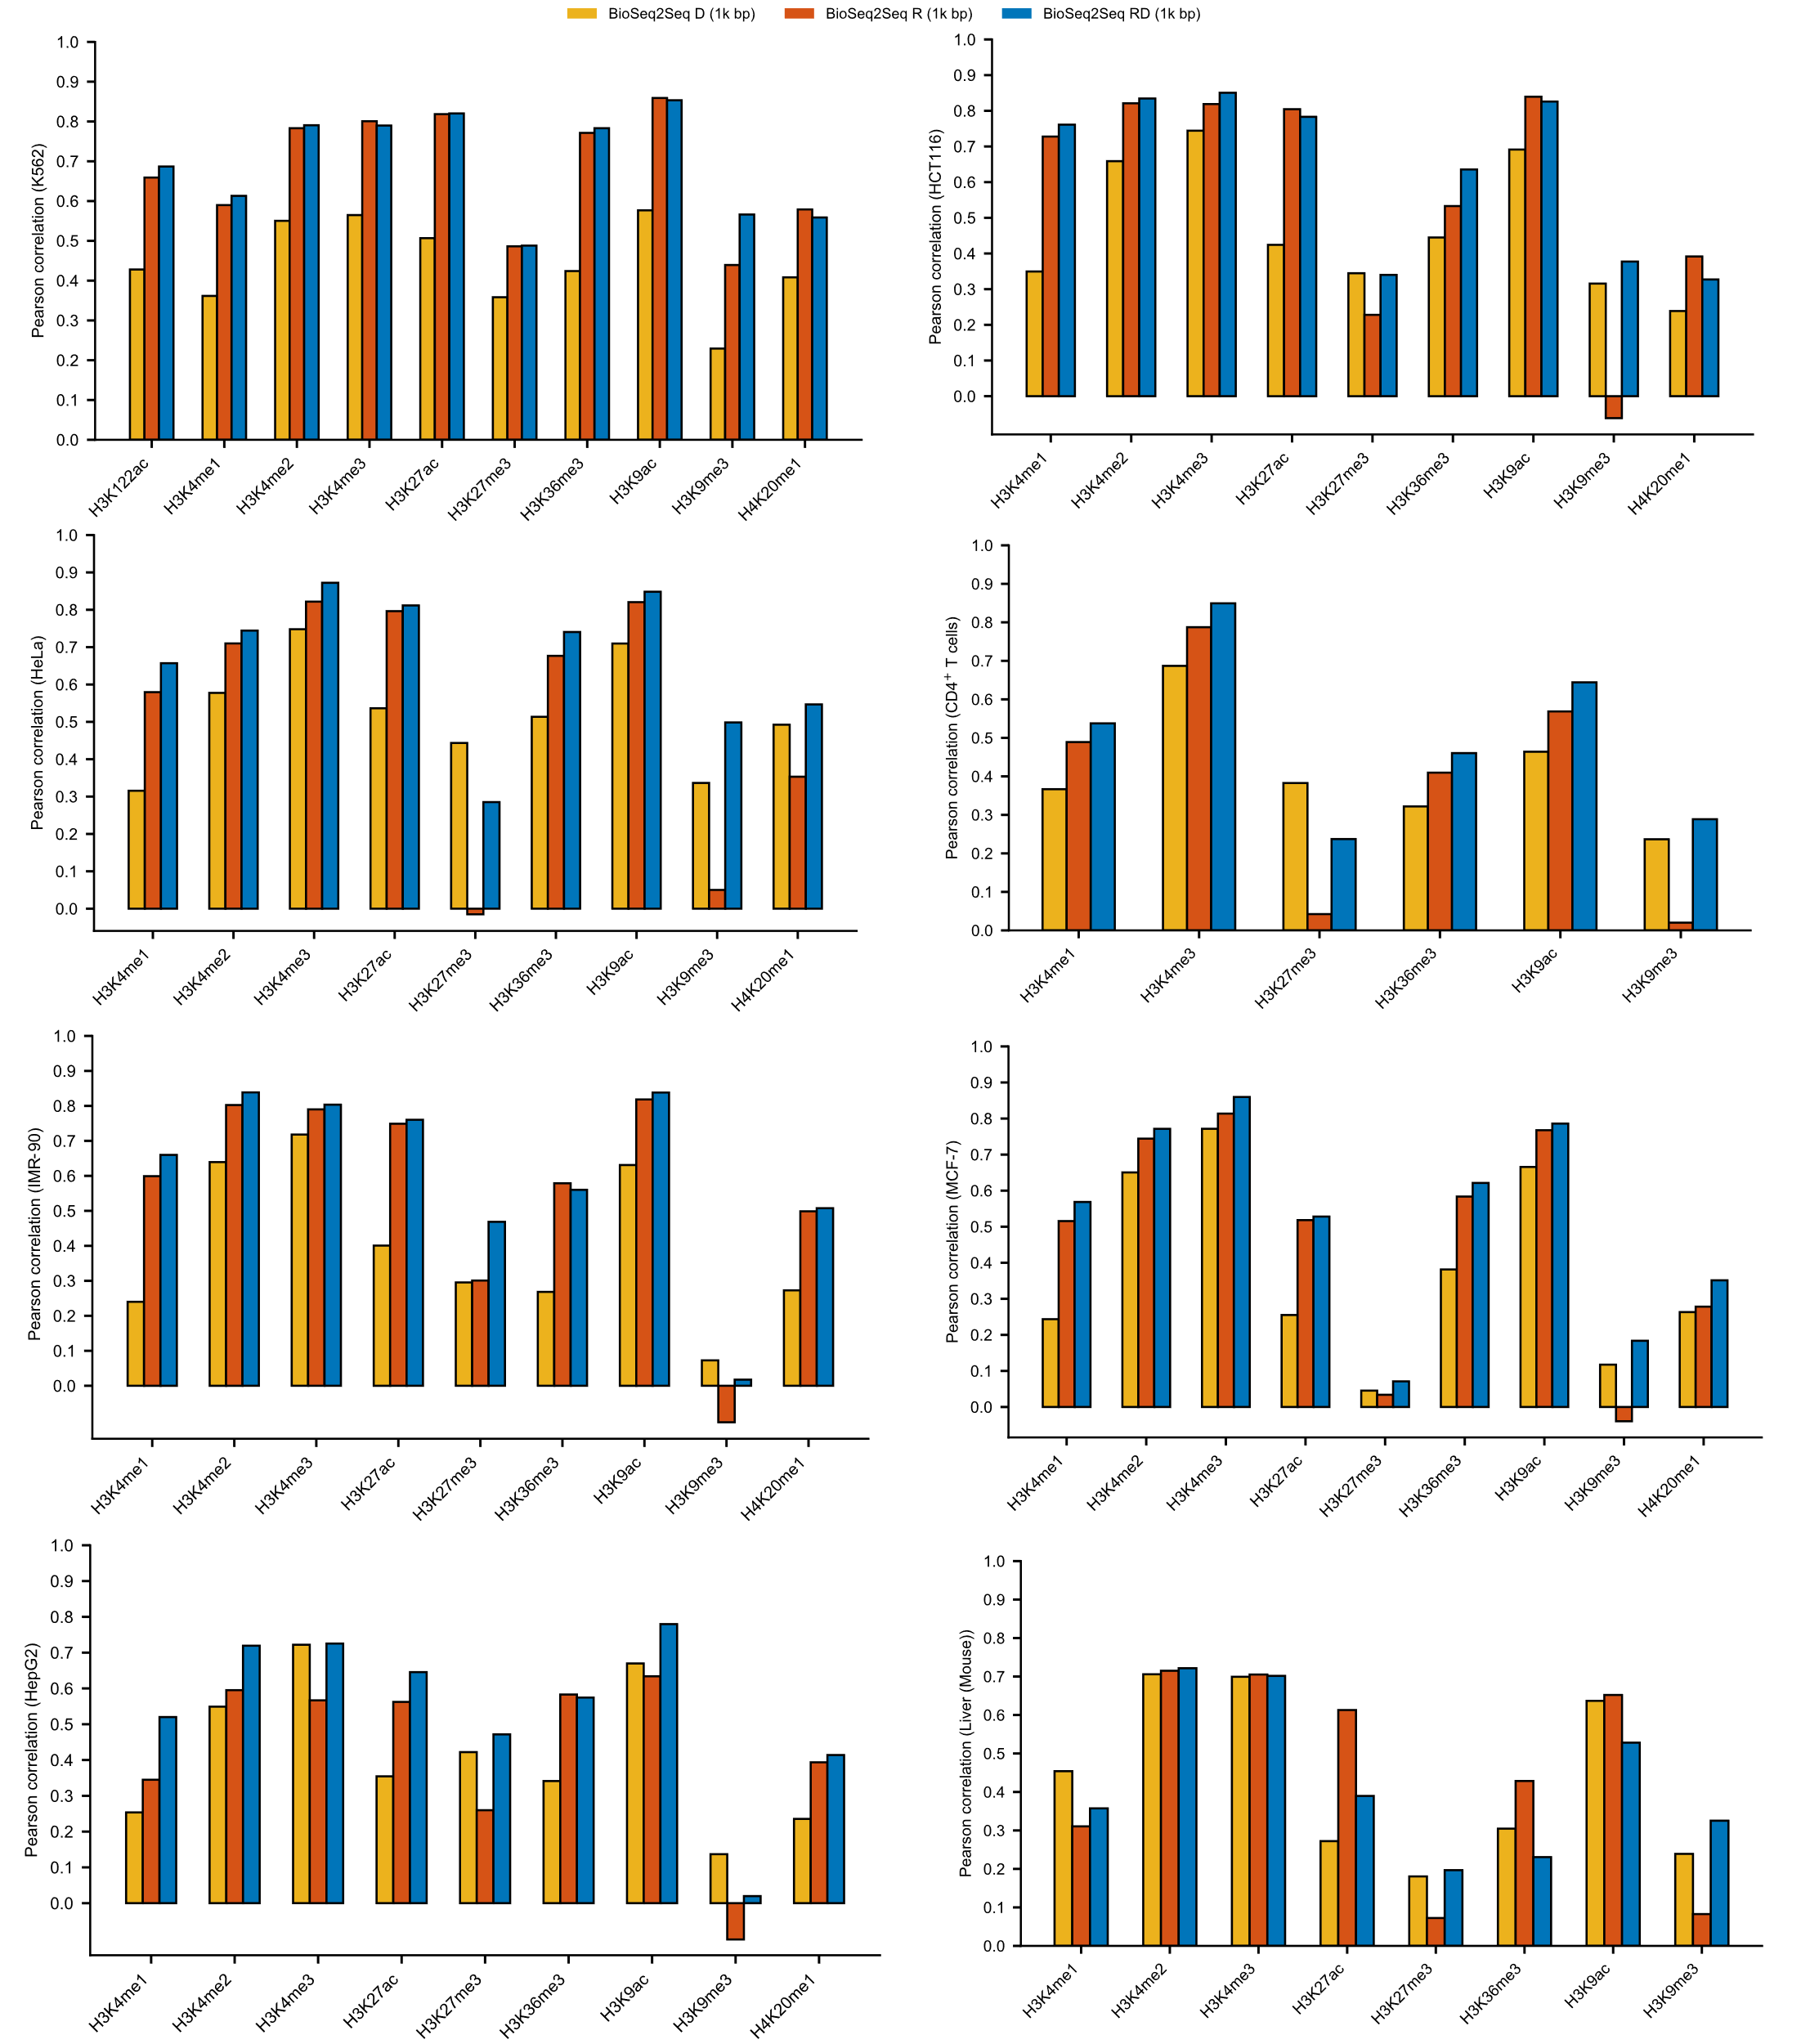


**Supplementary Figure S7: Comparison of the Pearson correlation among the three models: RD, R, and D.**


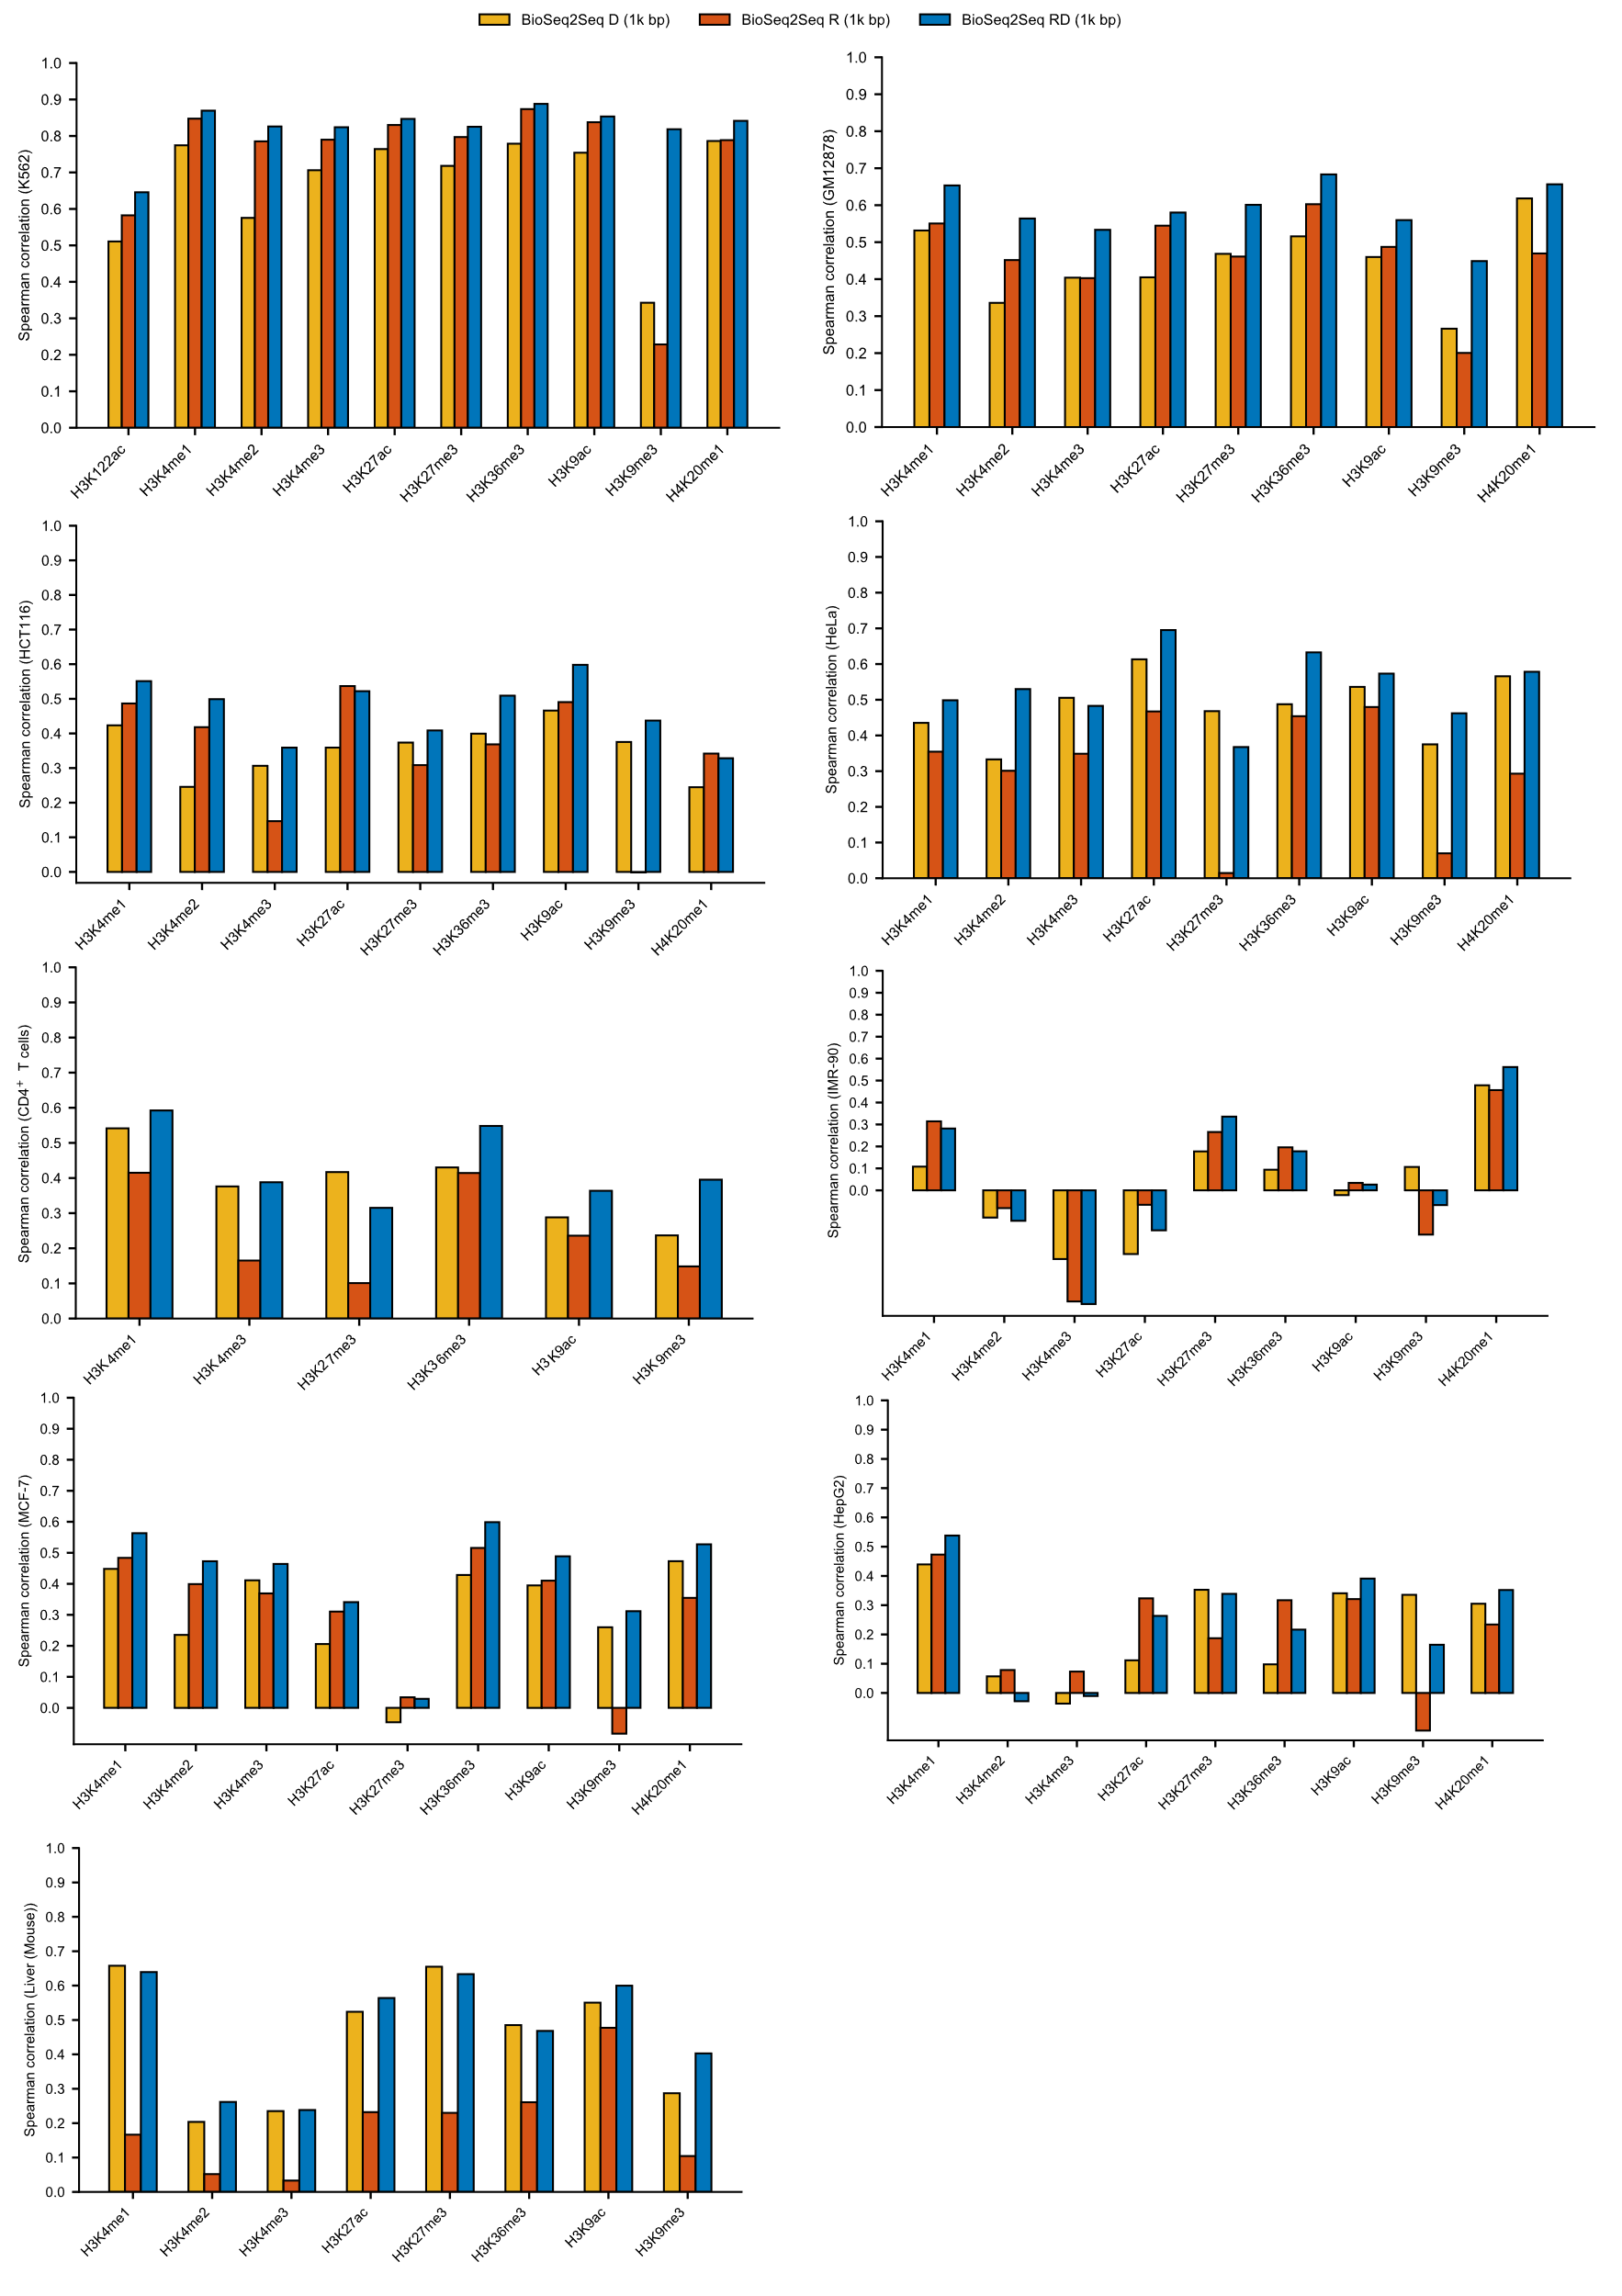


**Supplementary Figure S8: Comparison of the Spearman correlation among the three models: RD, R, and D.**


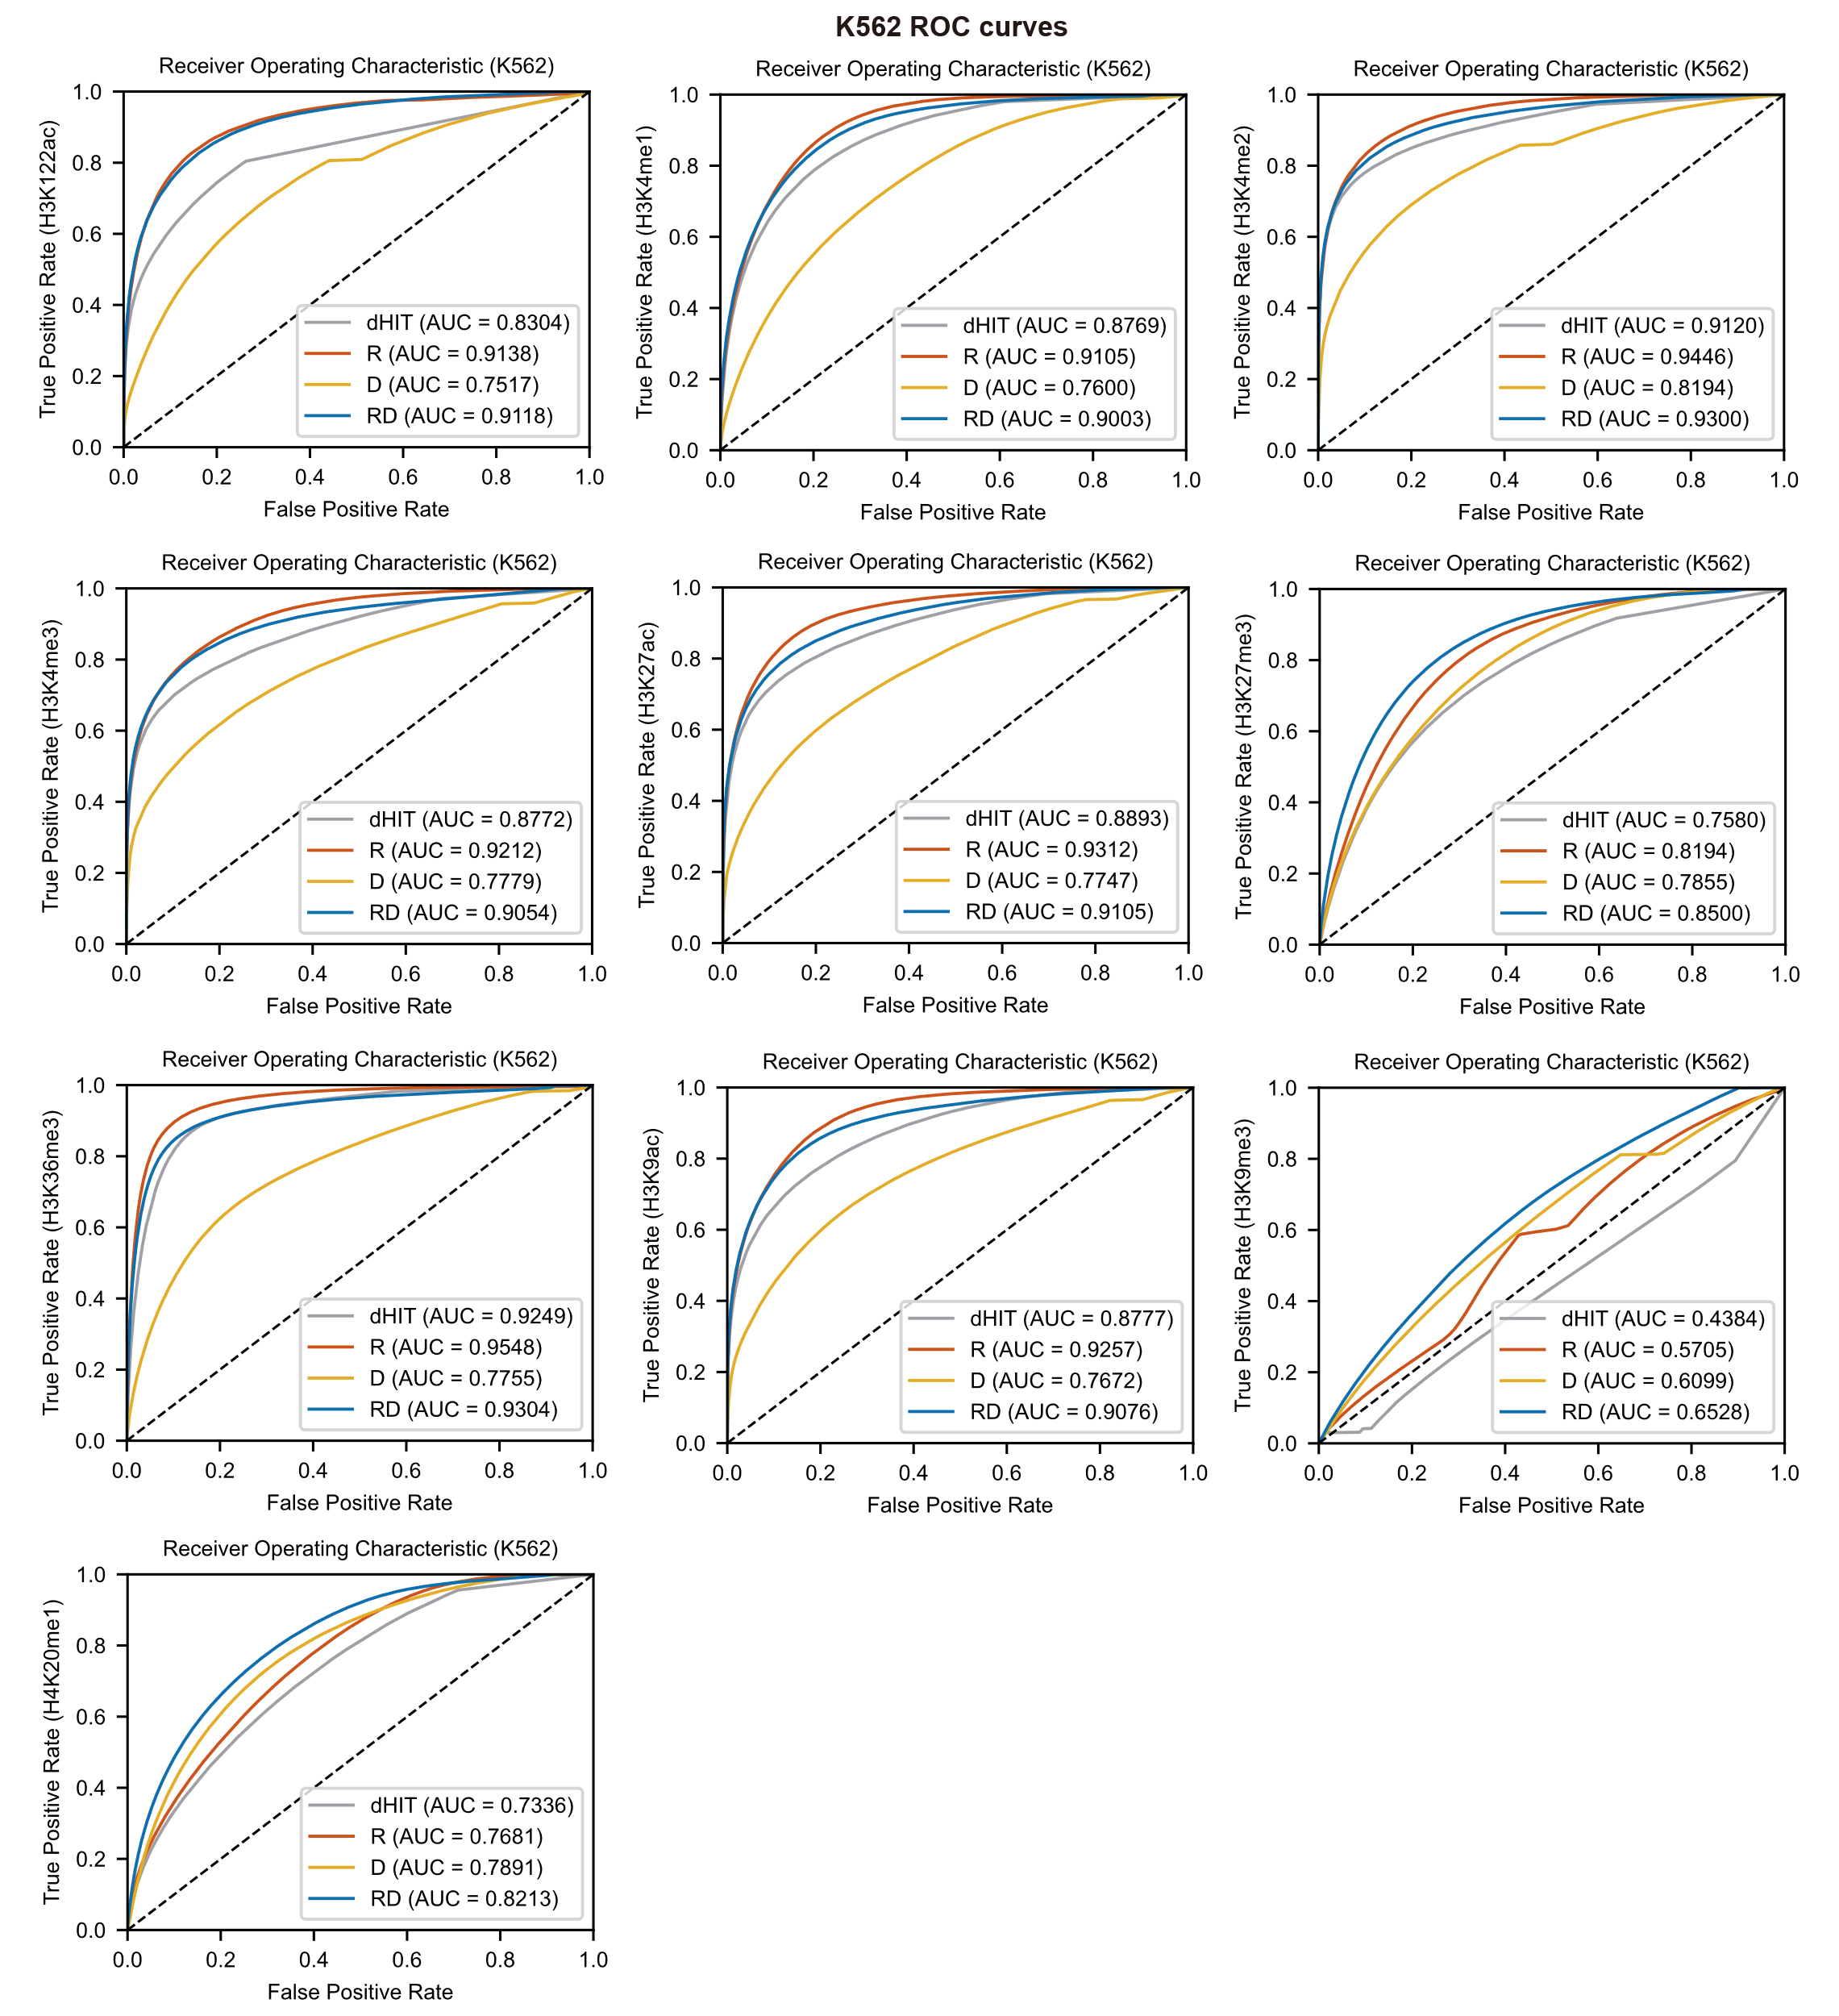


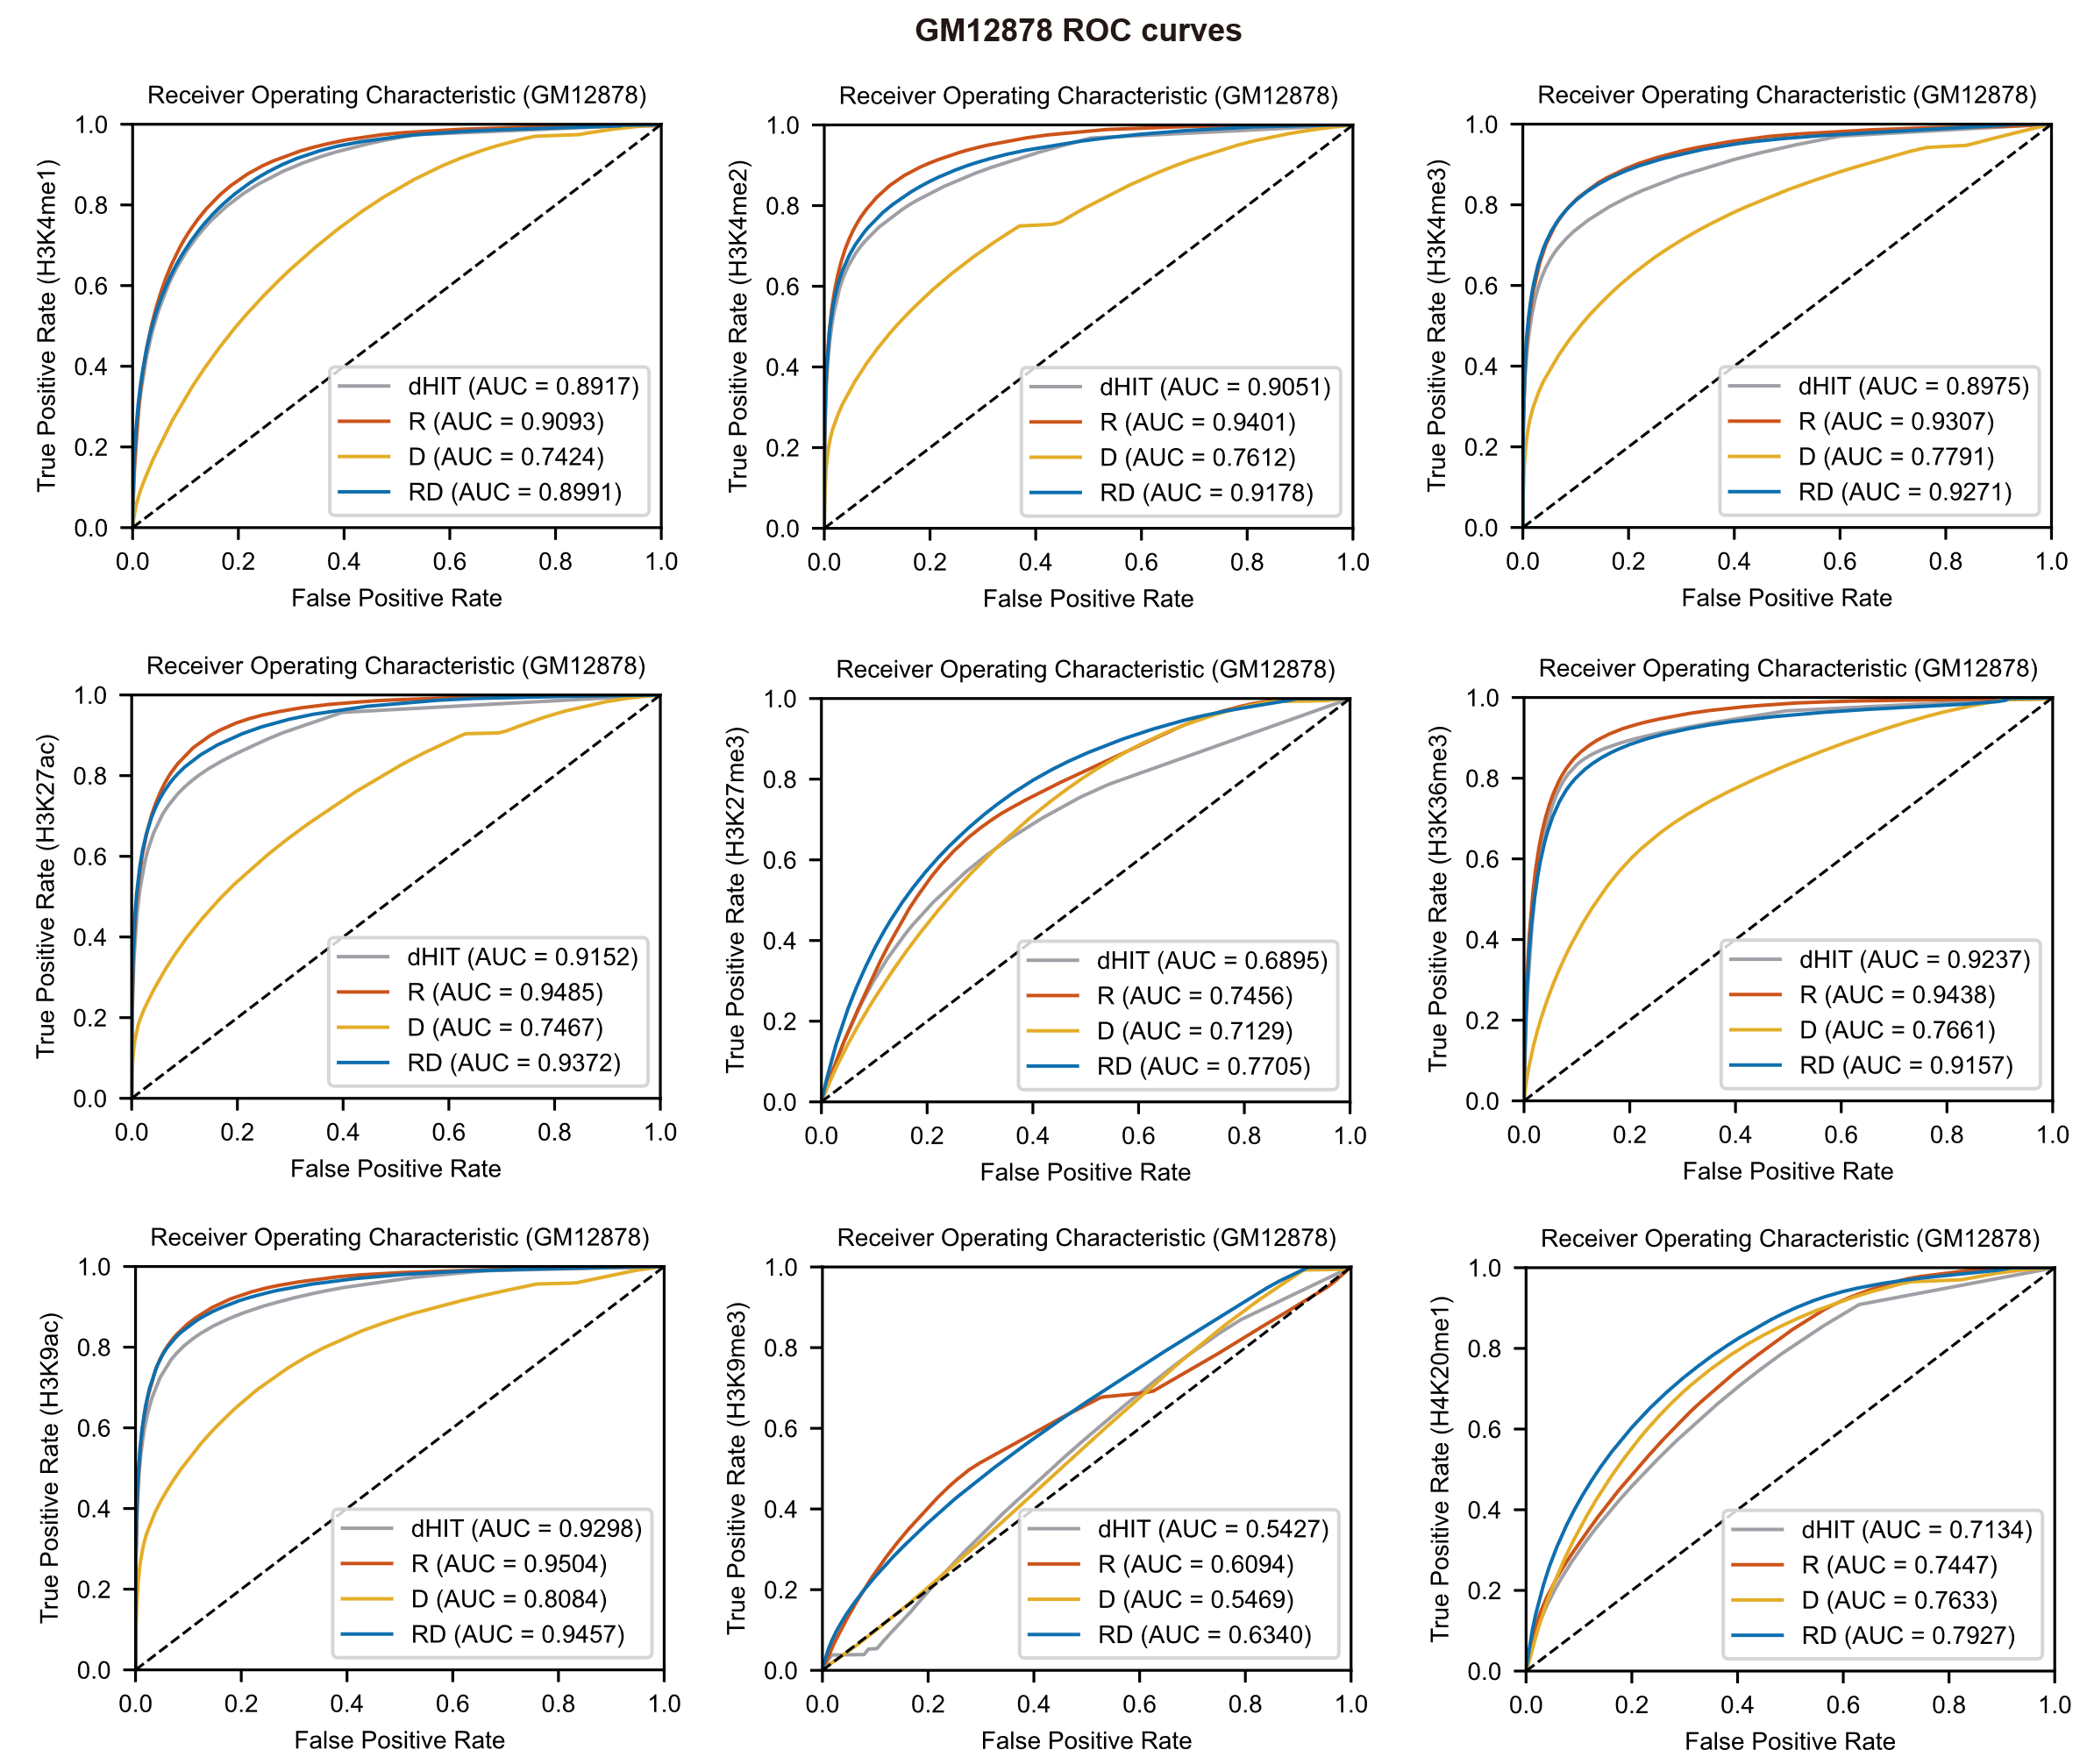


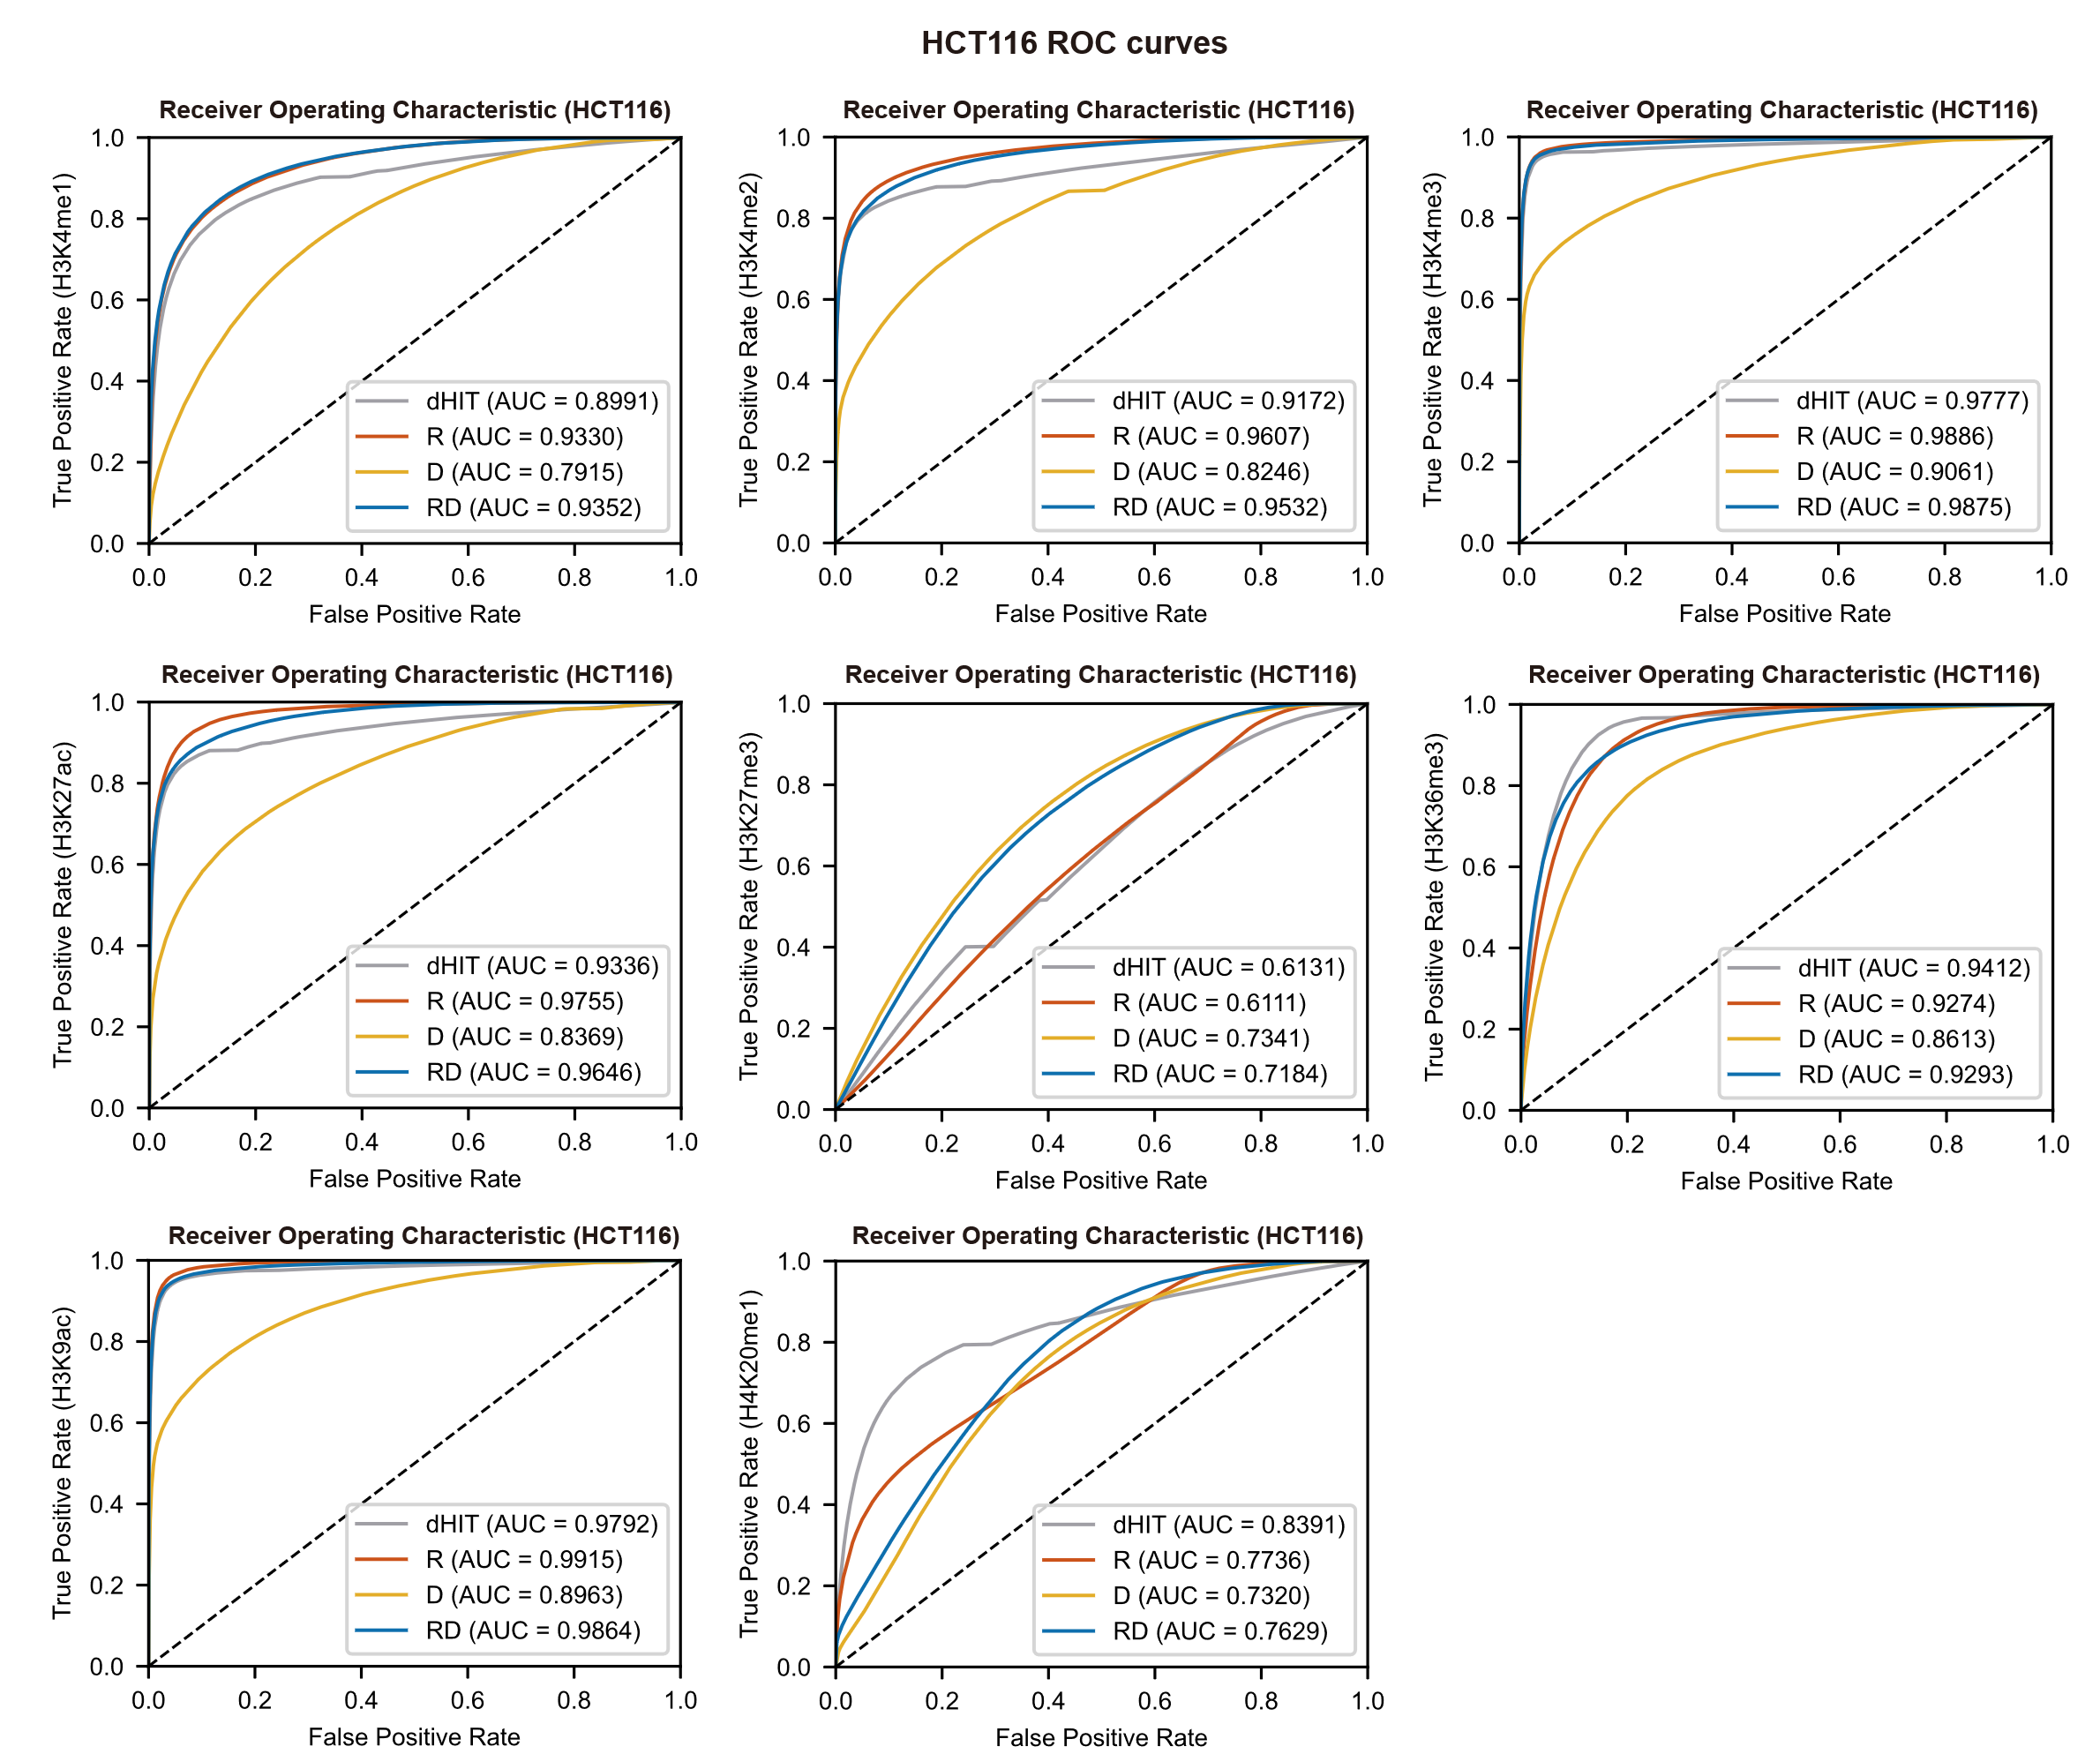


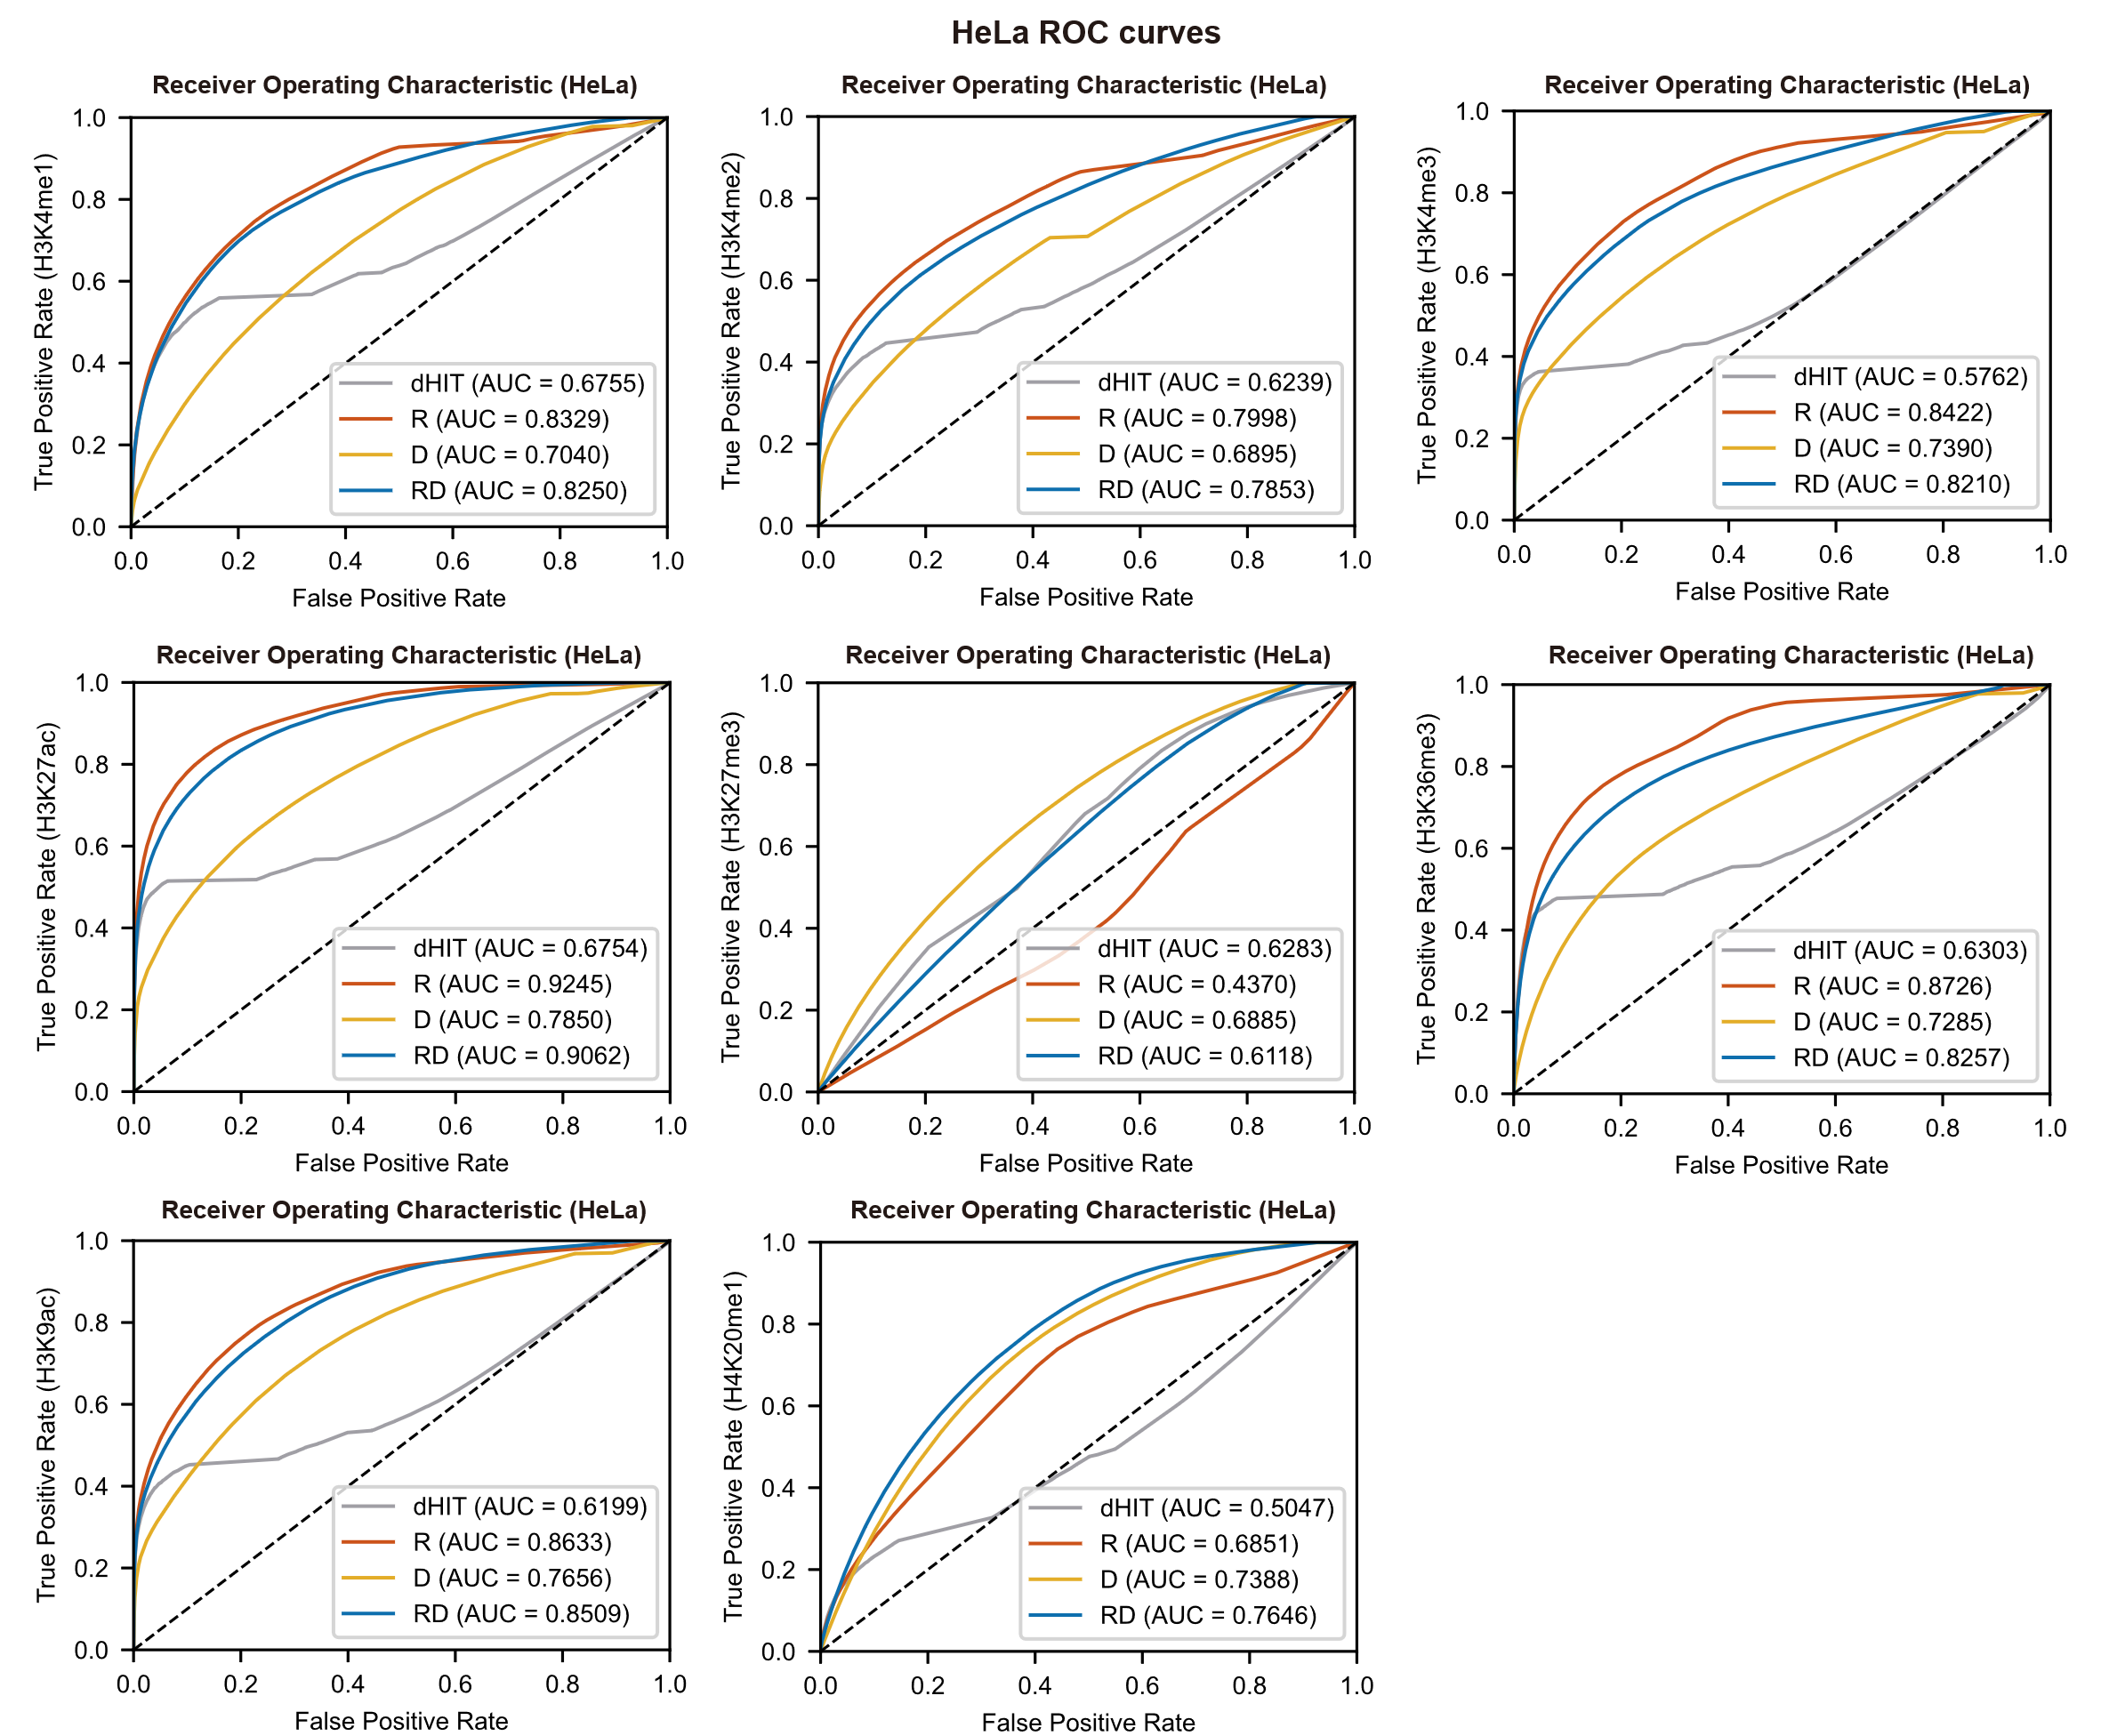


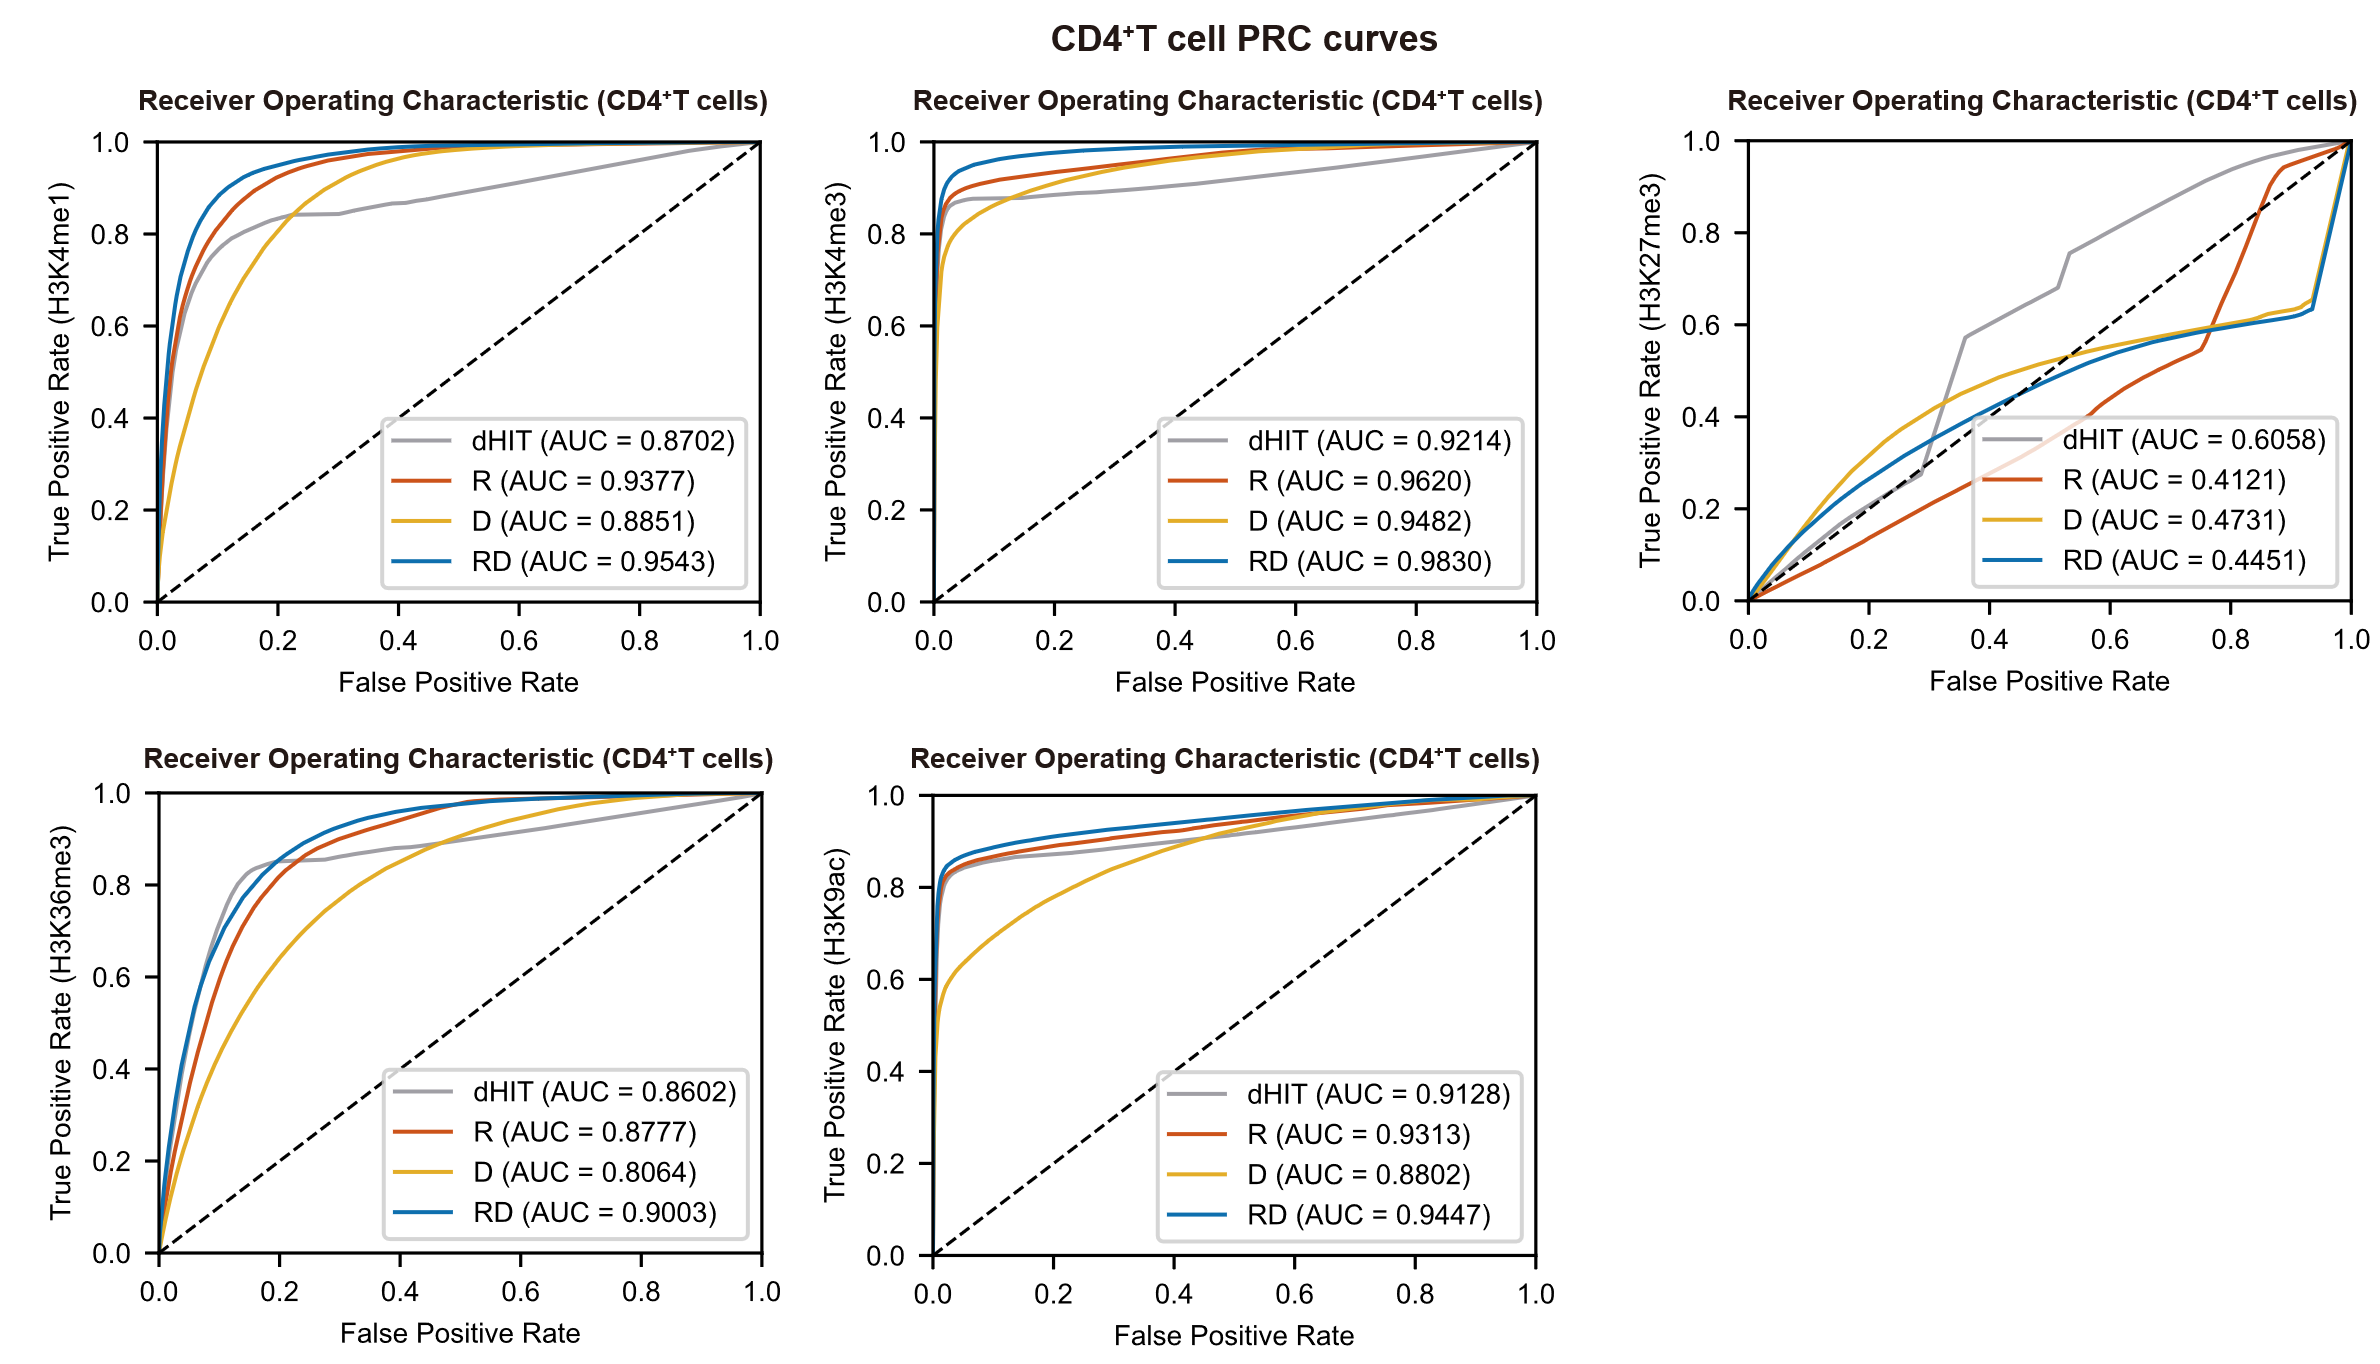


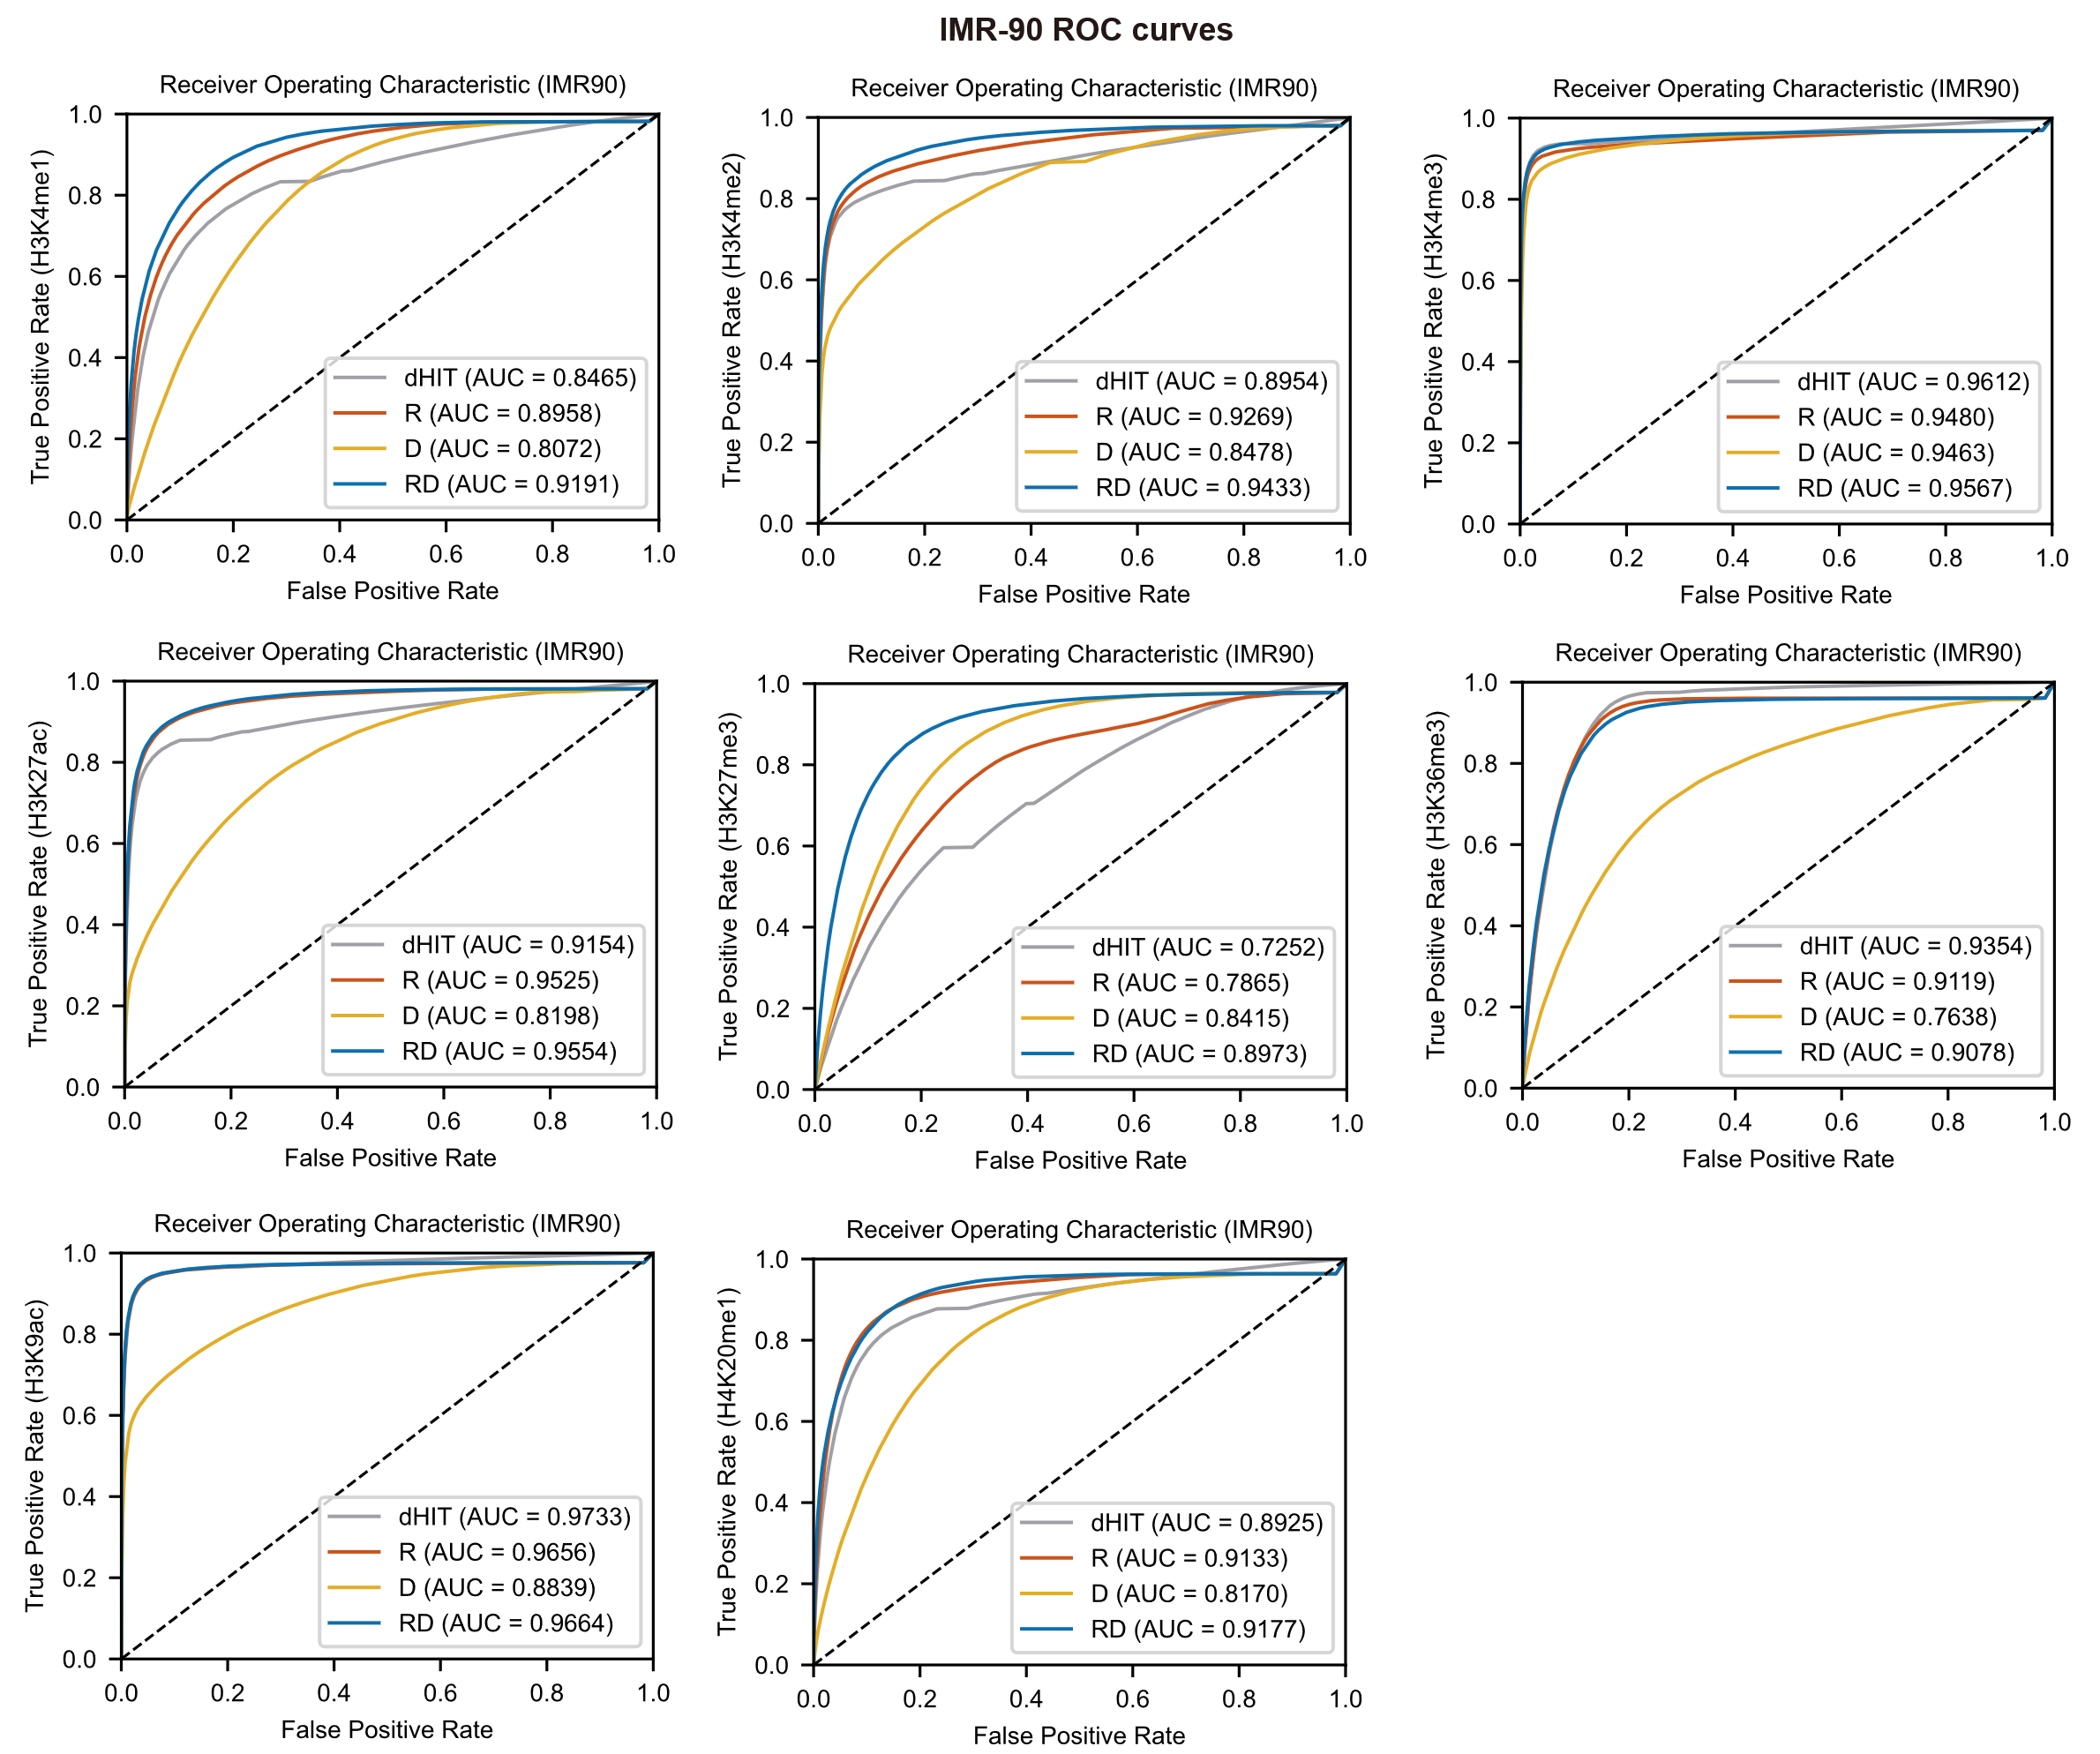


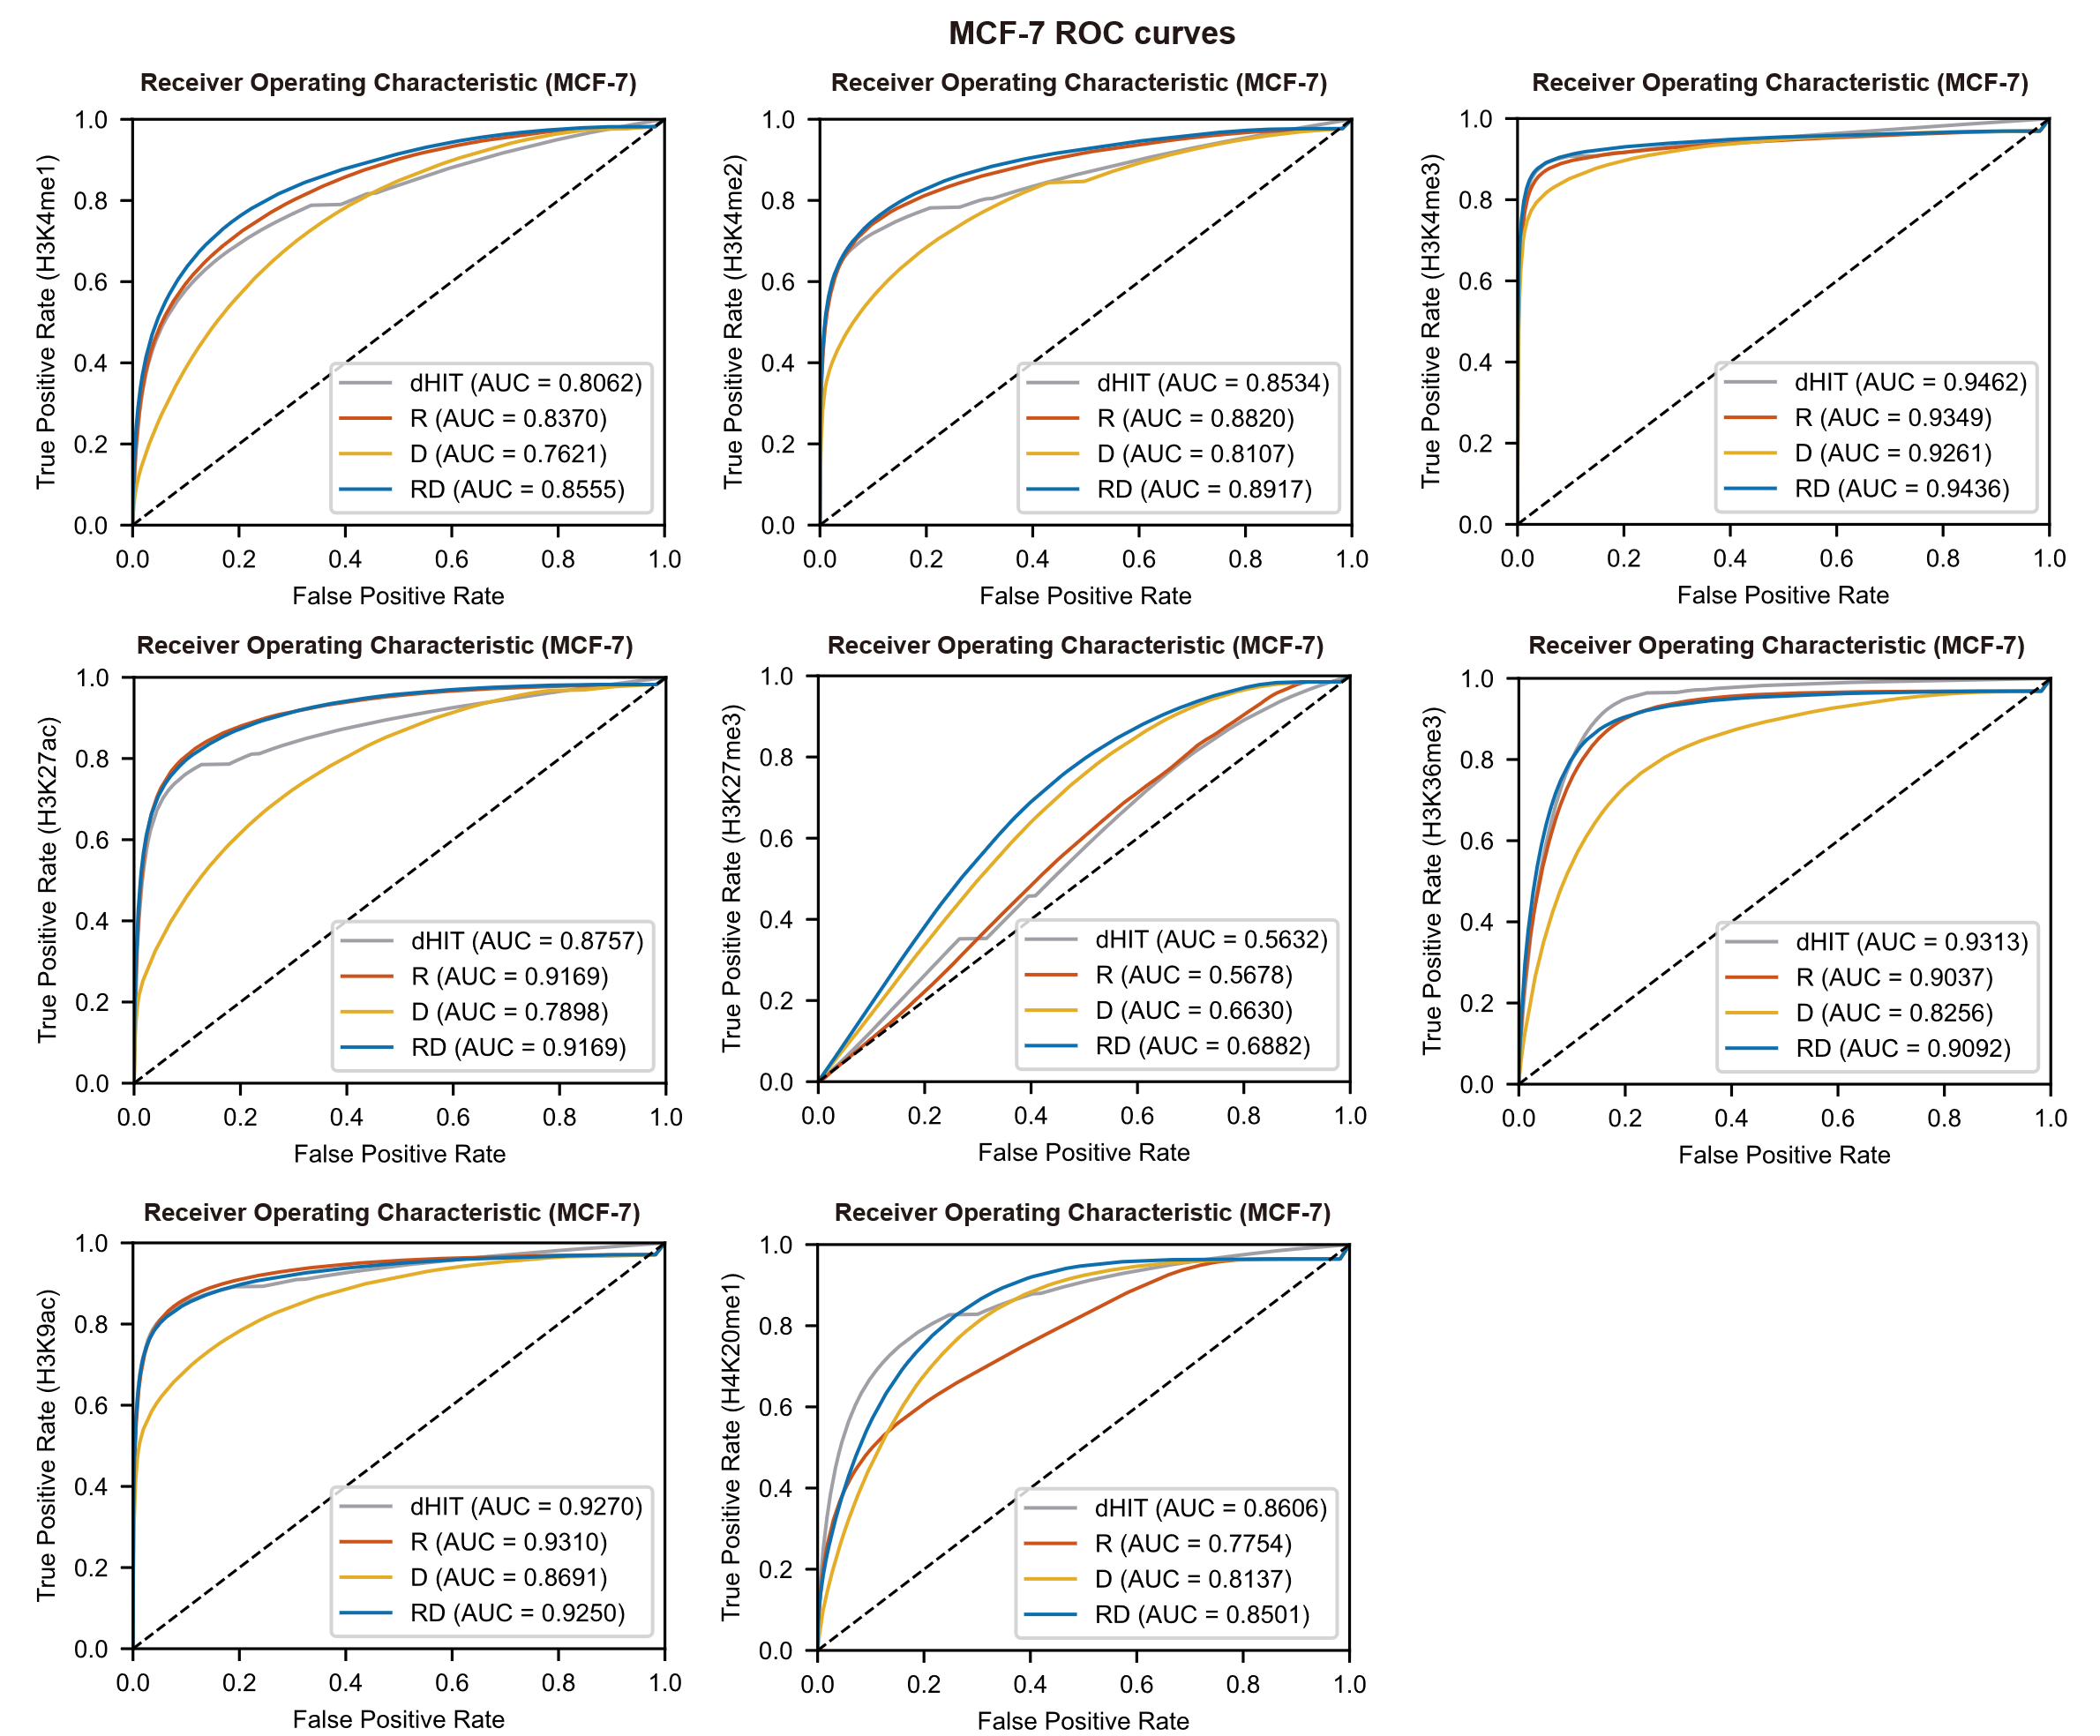


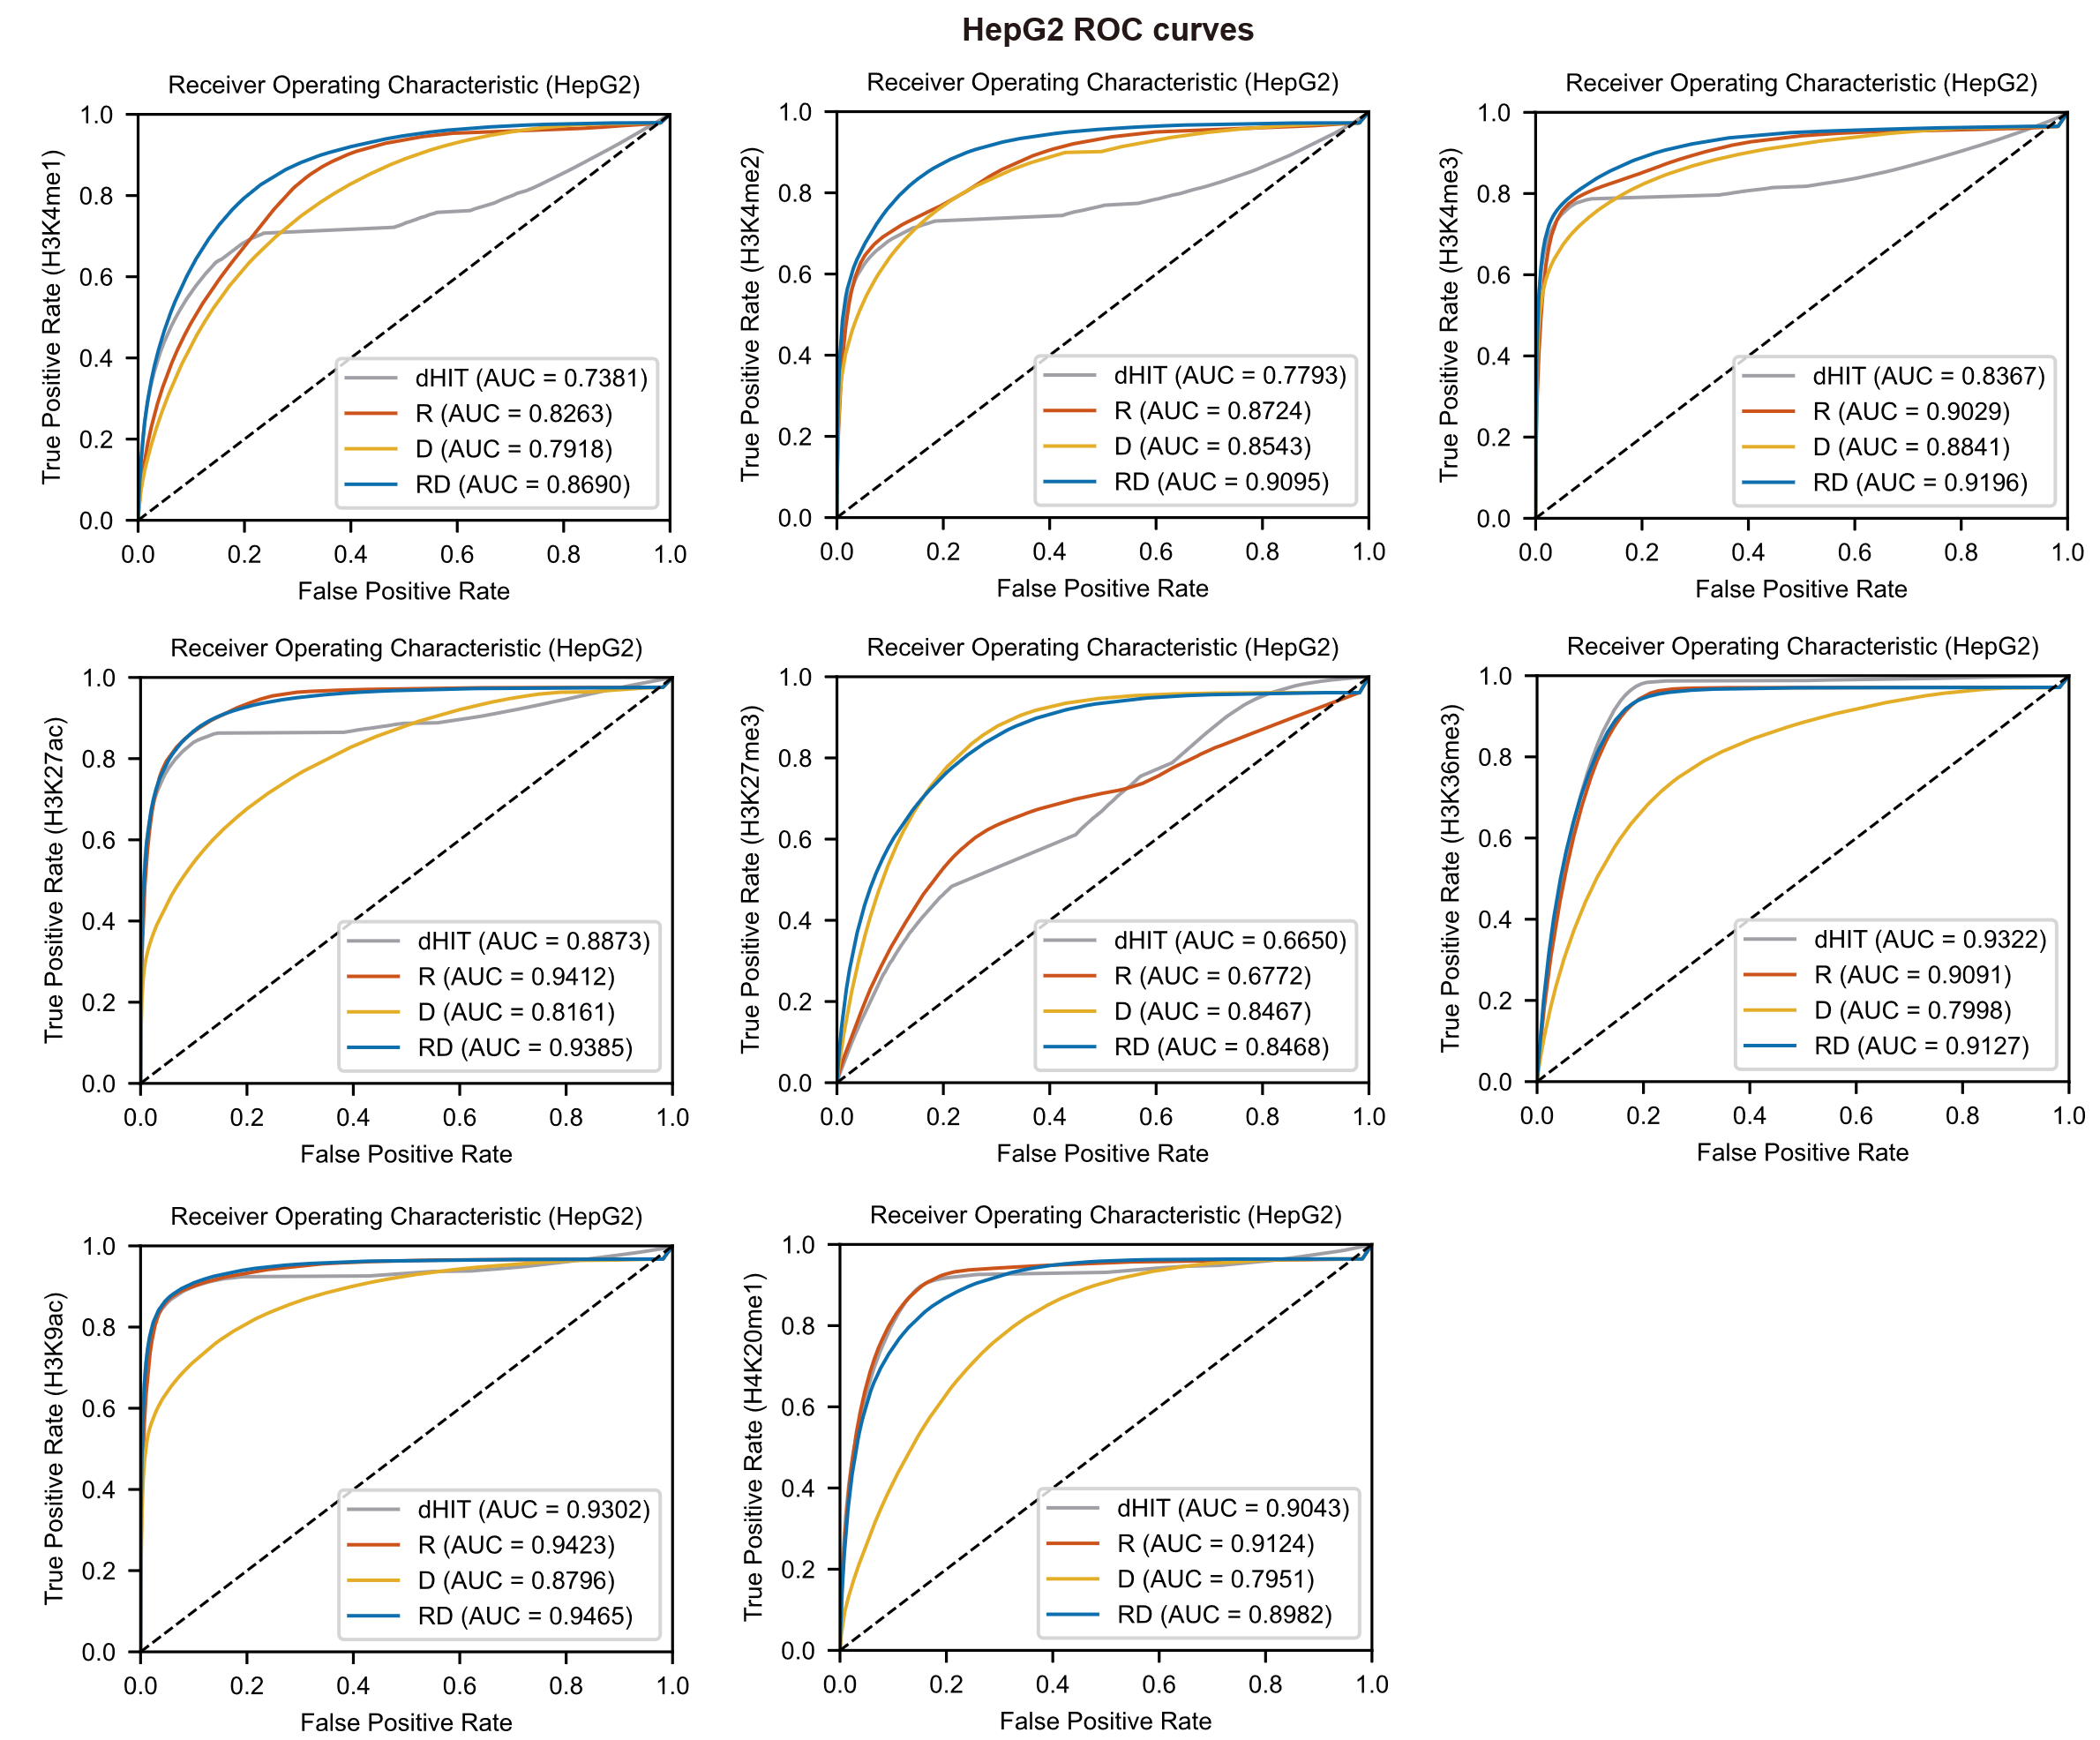


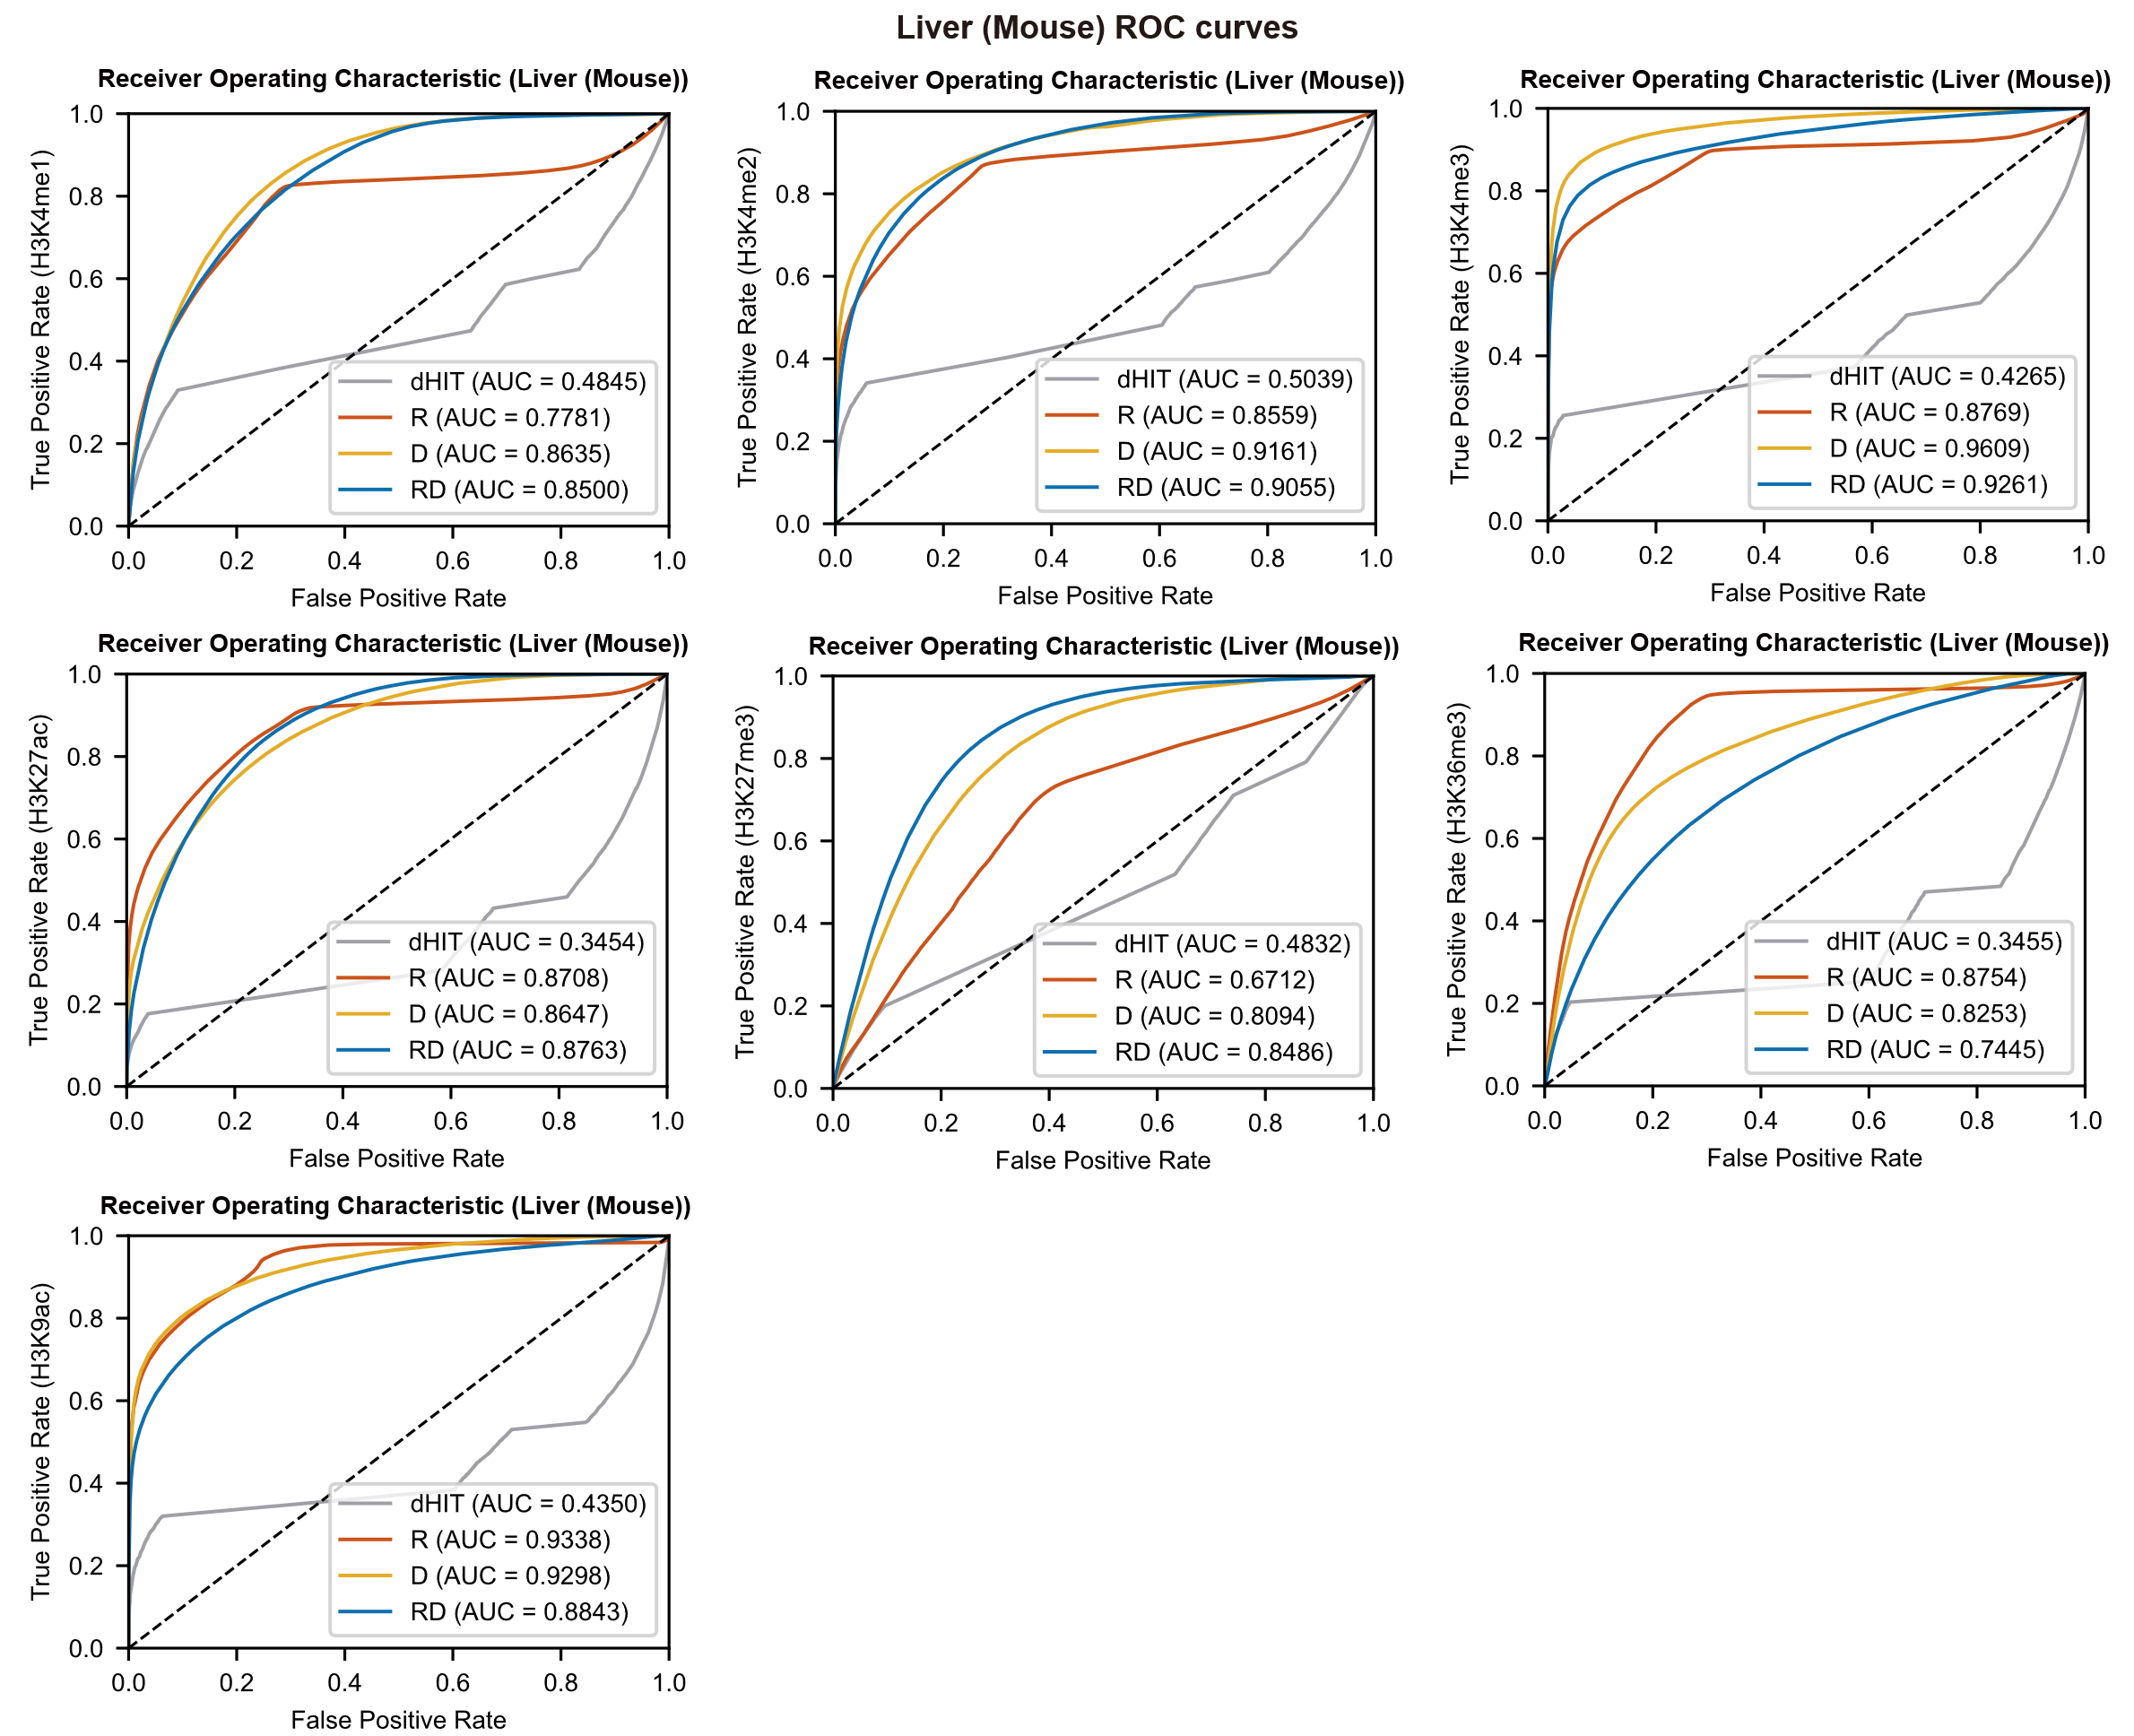


**Supplementary Figure S9: Comparison of ROC curves among RD, D, R, and the dHIT model.**


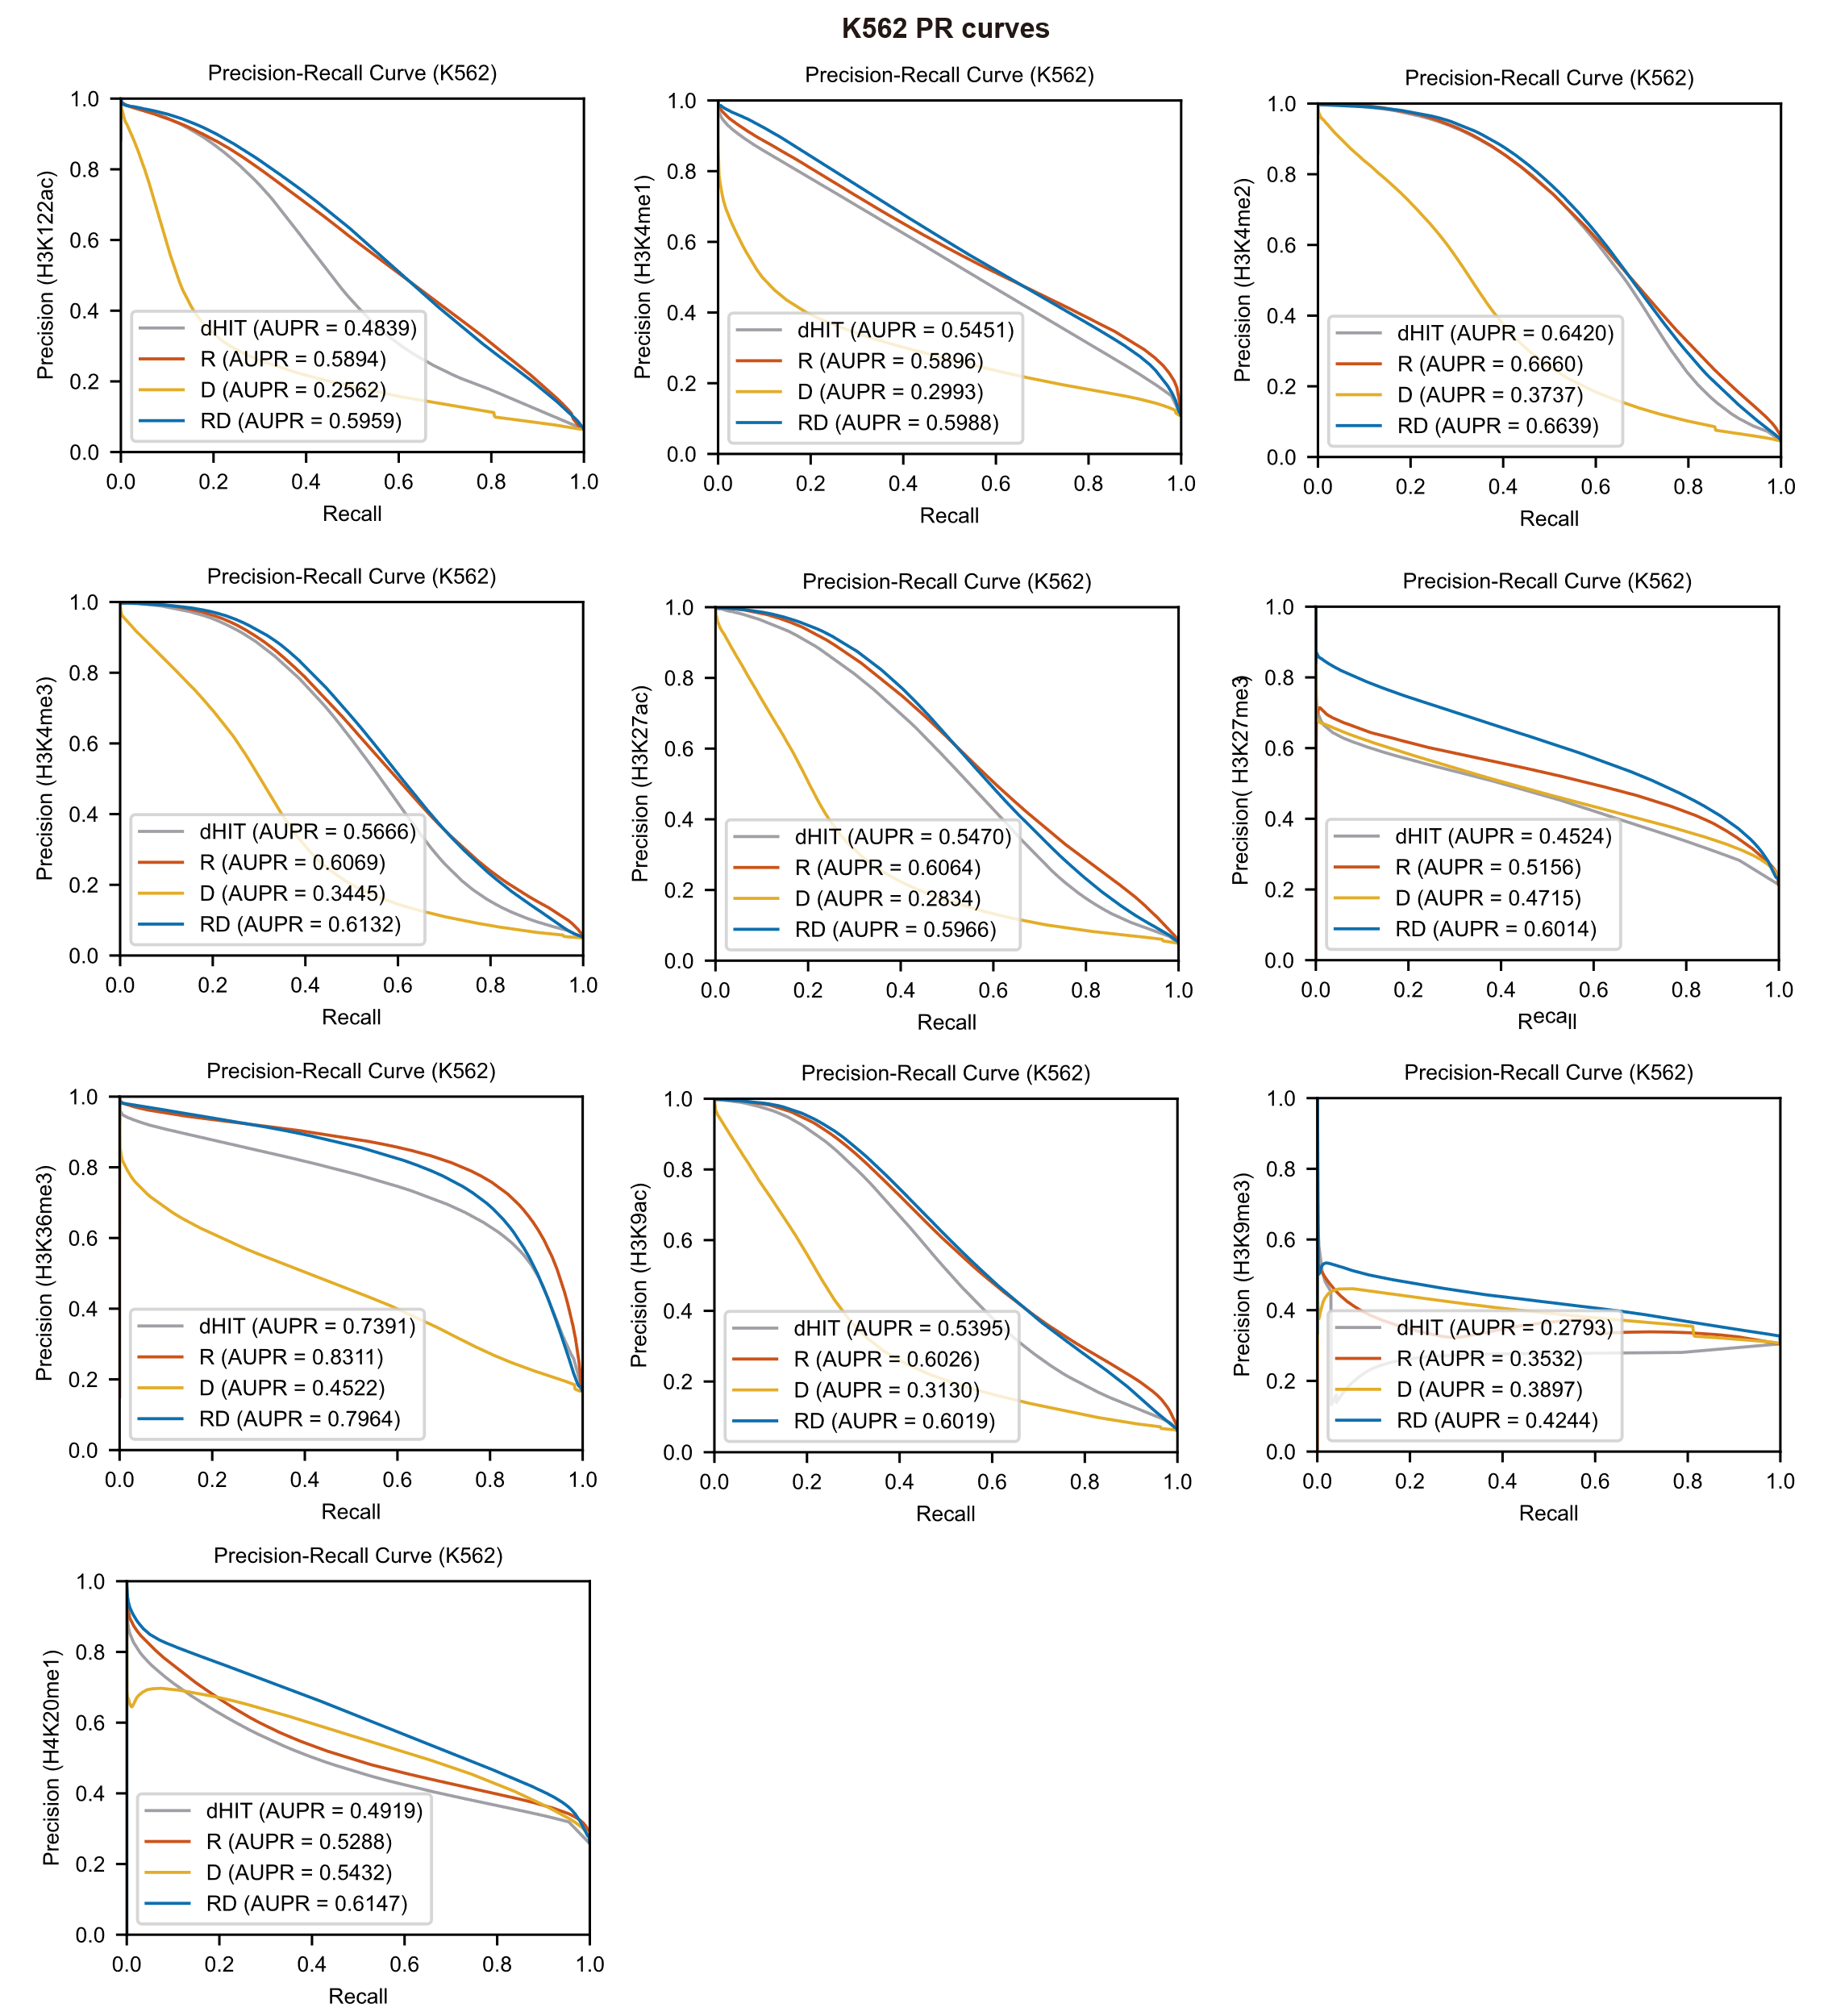


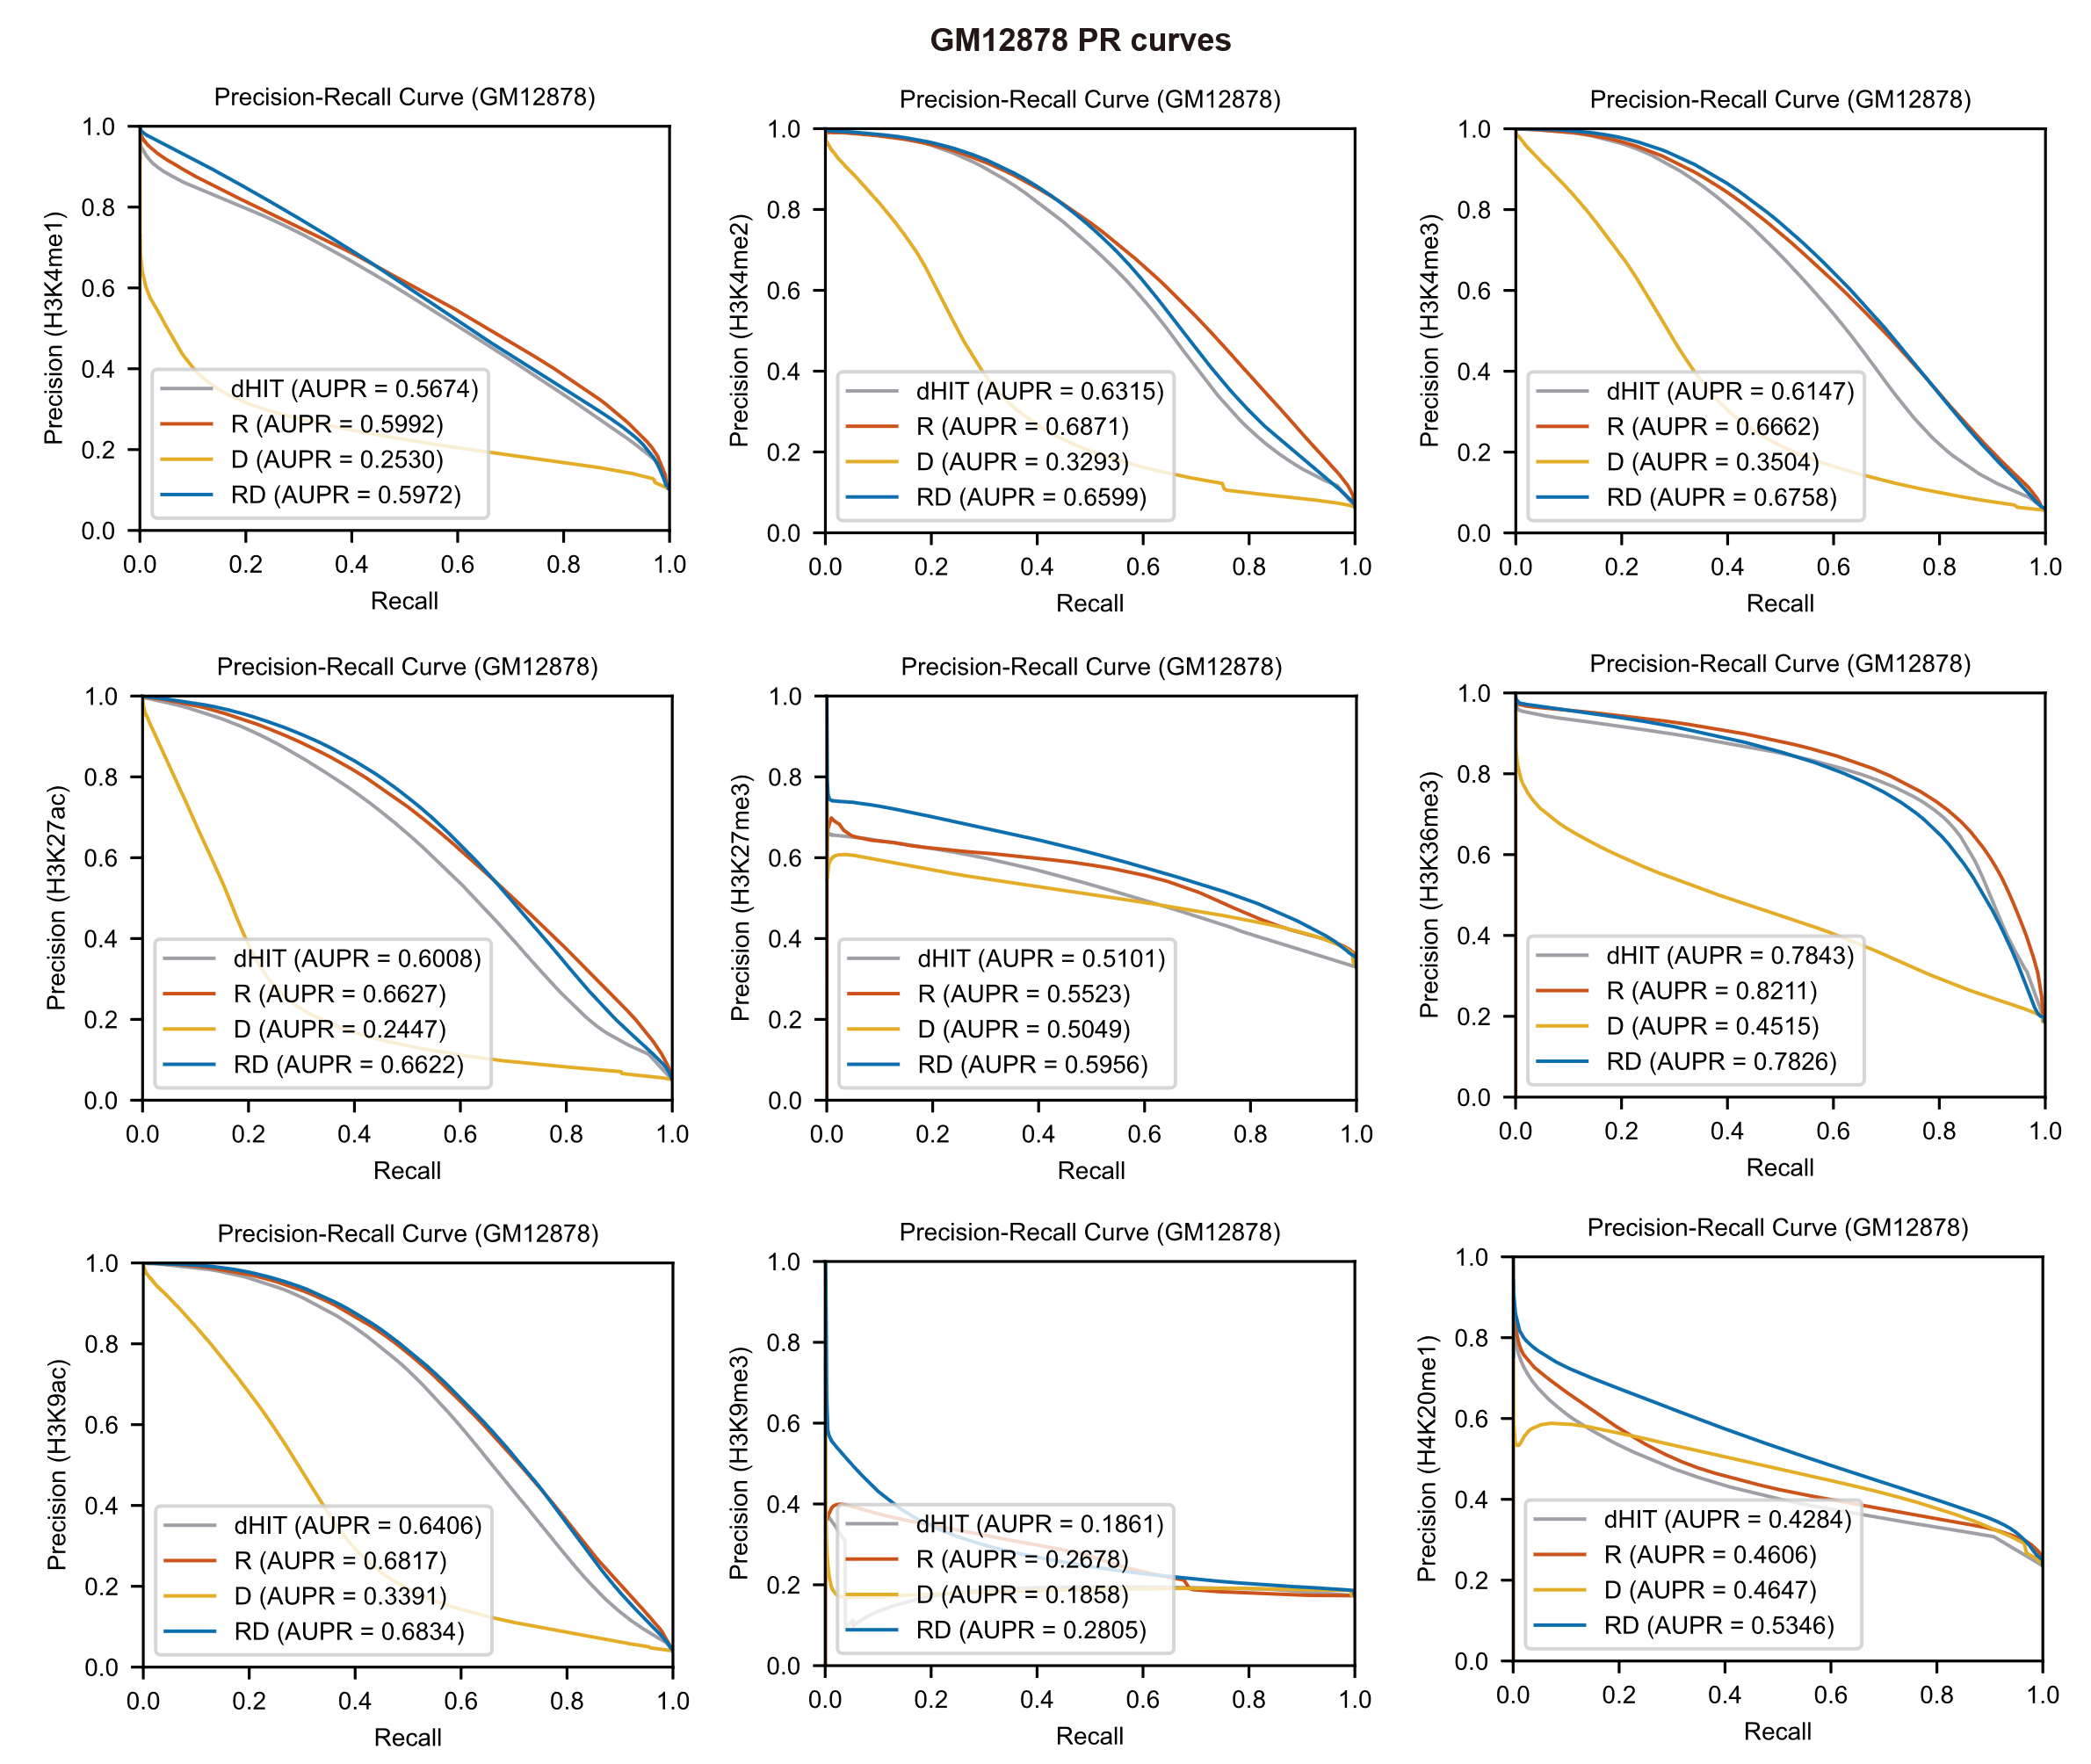


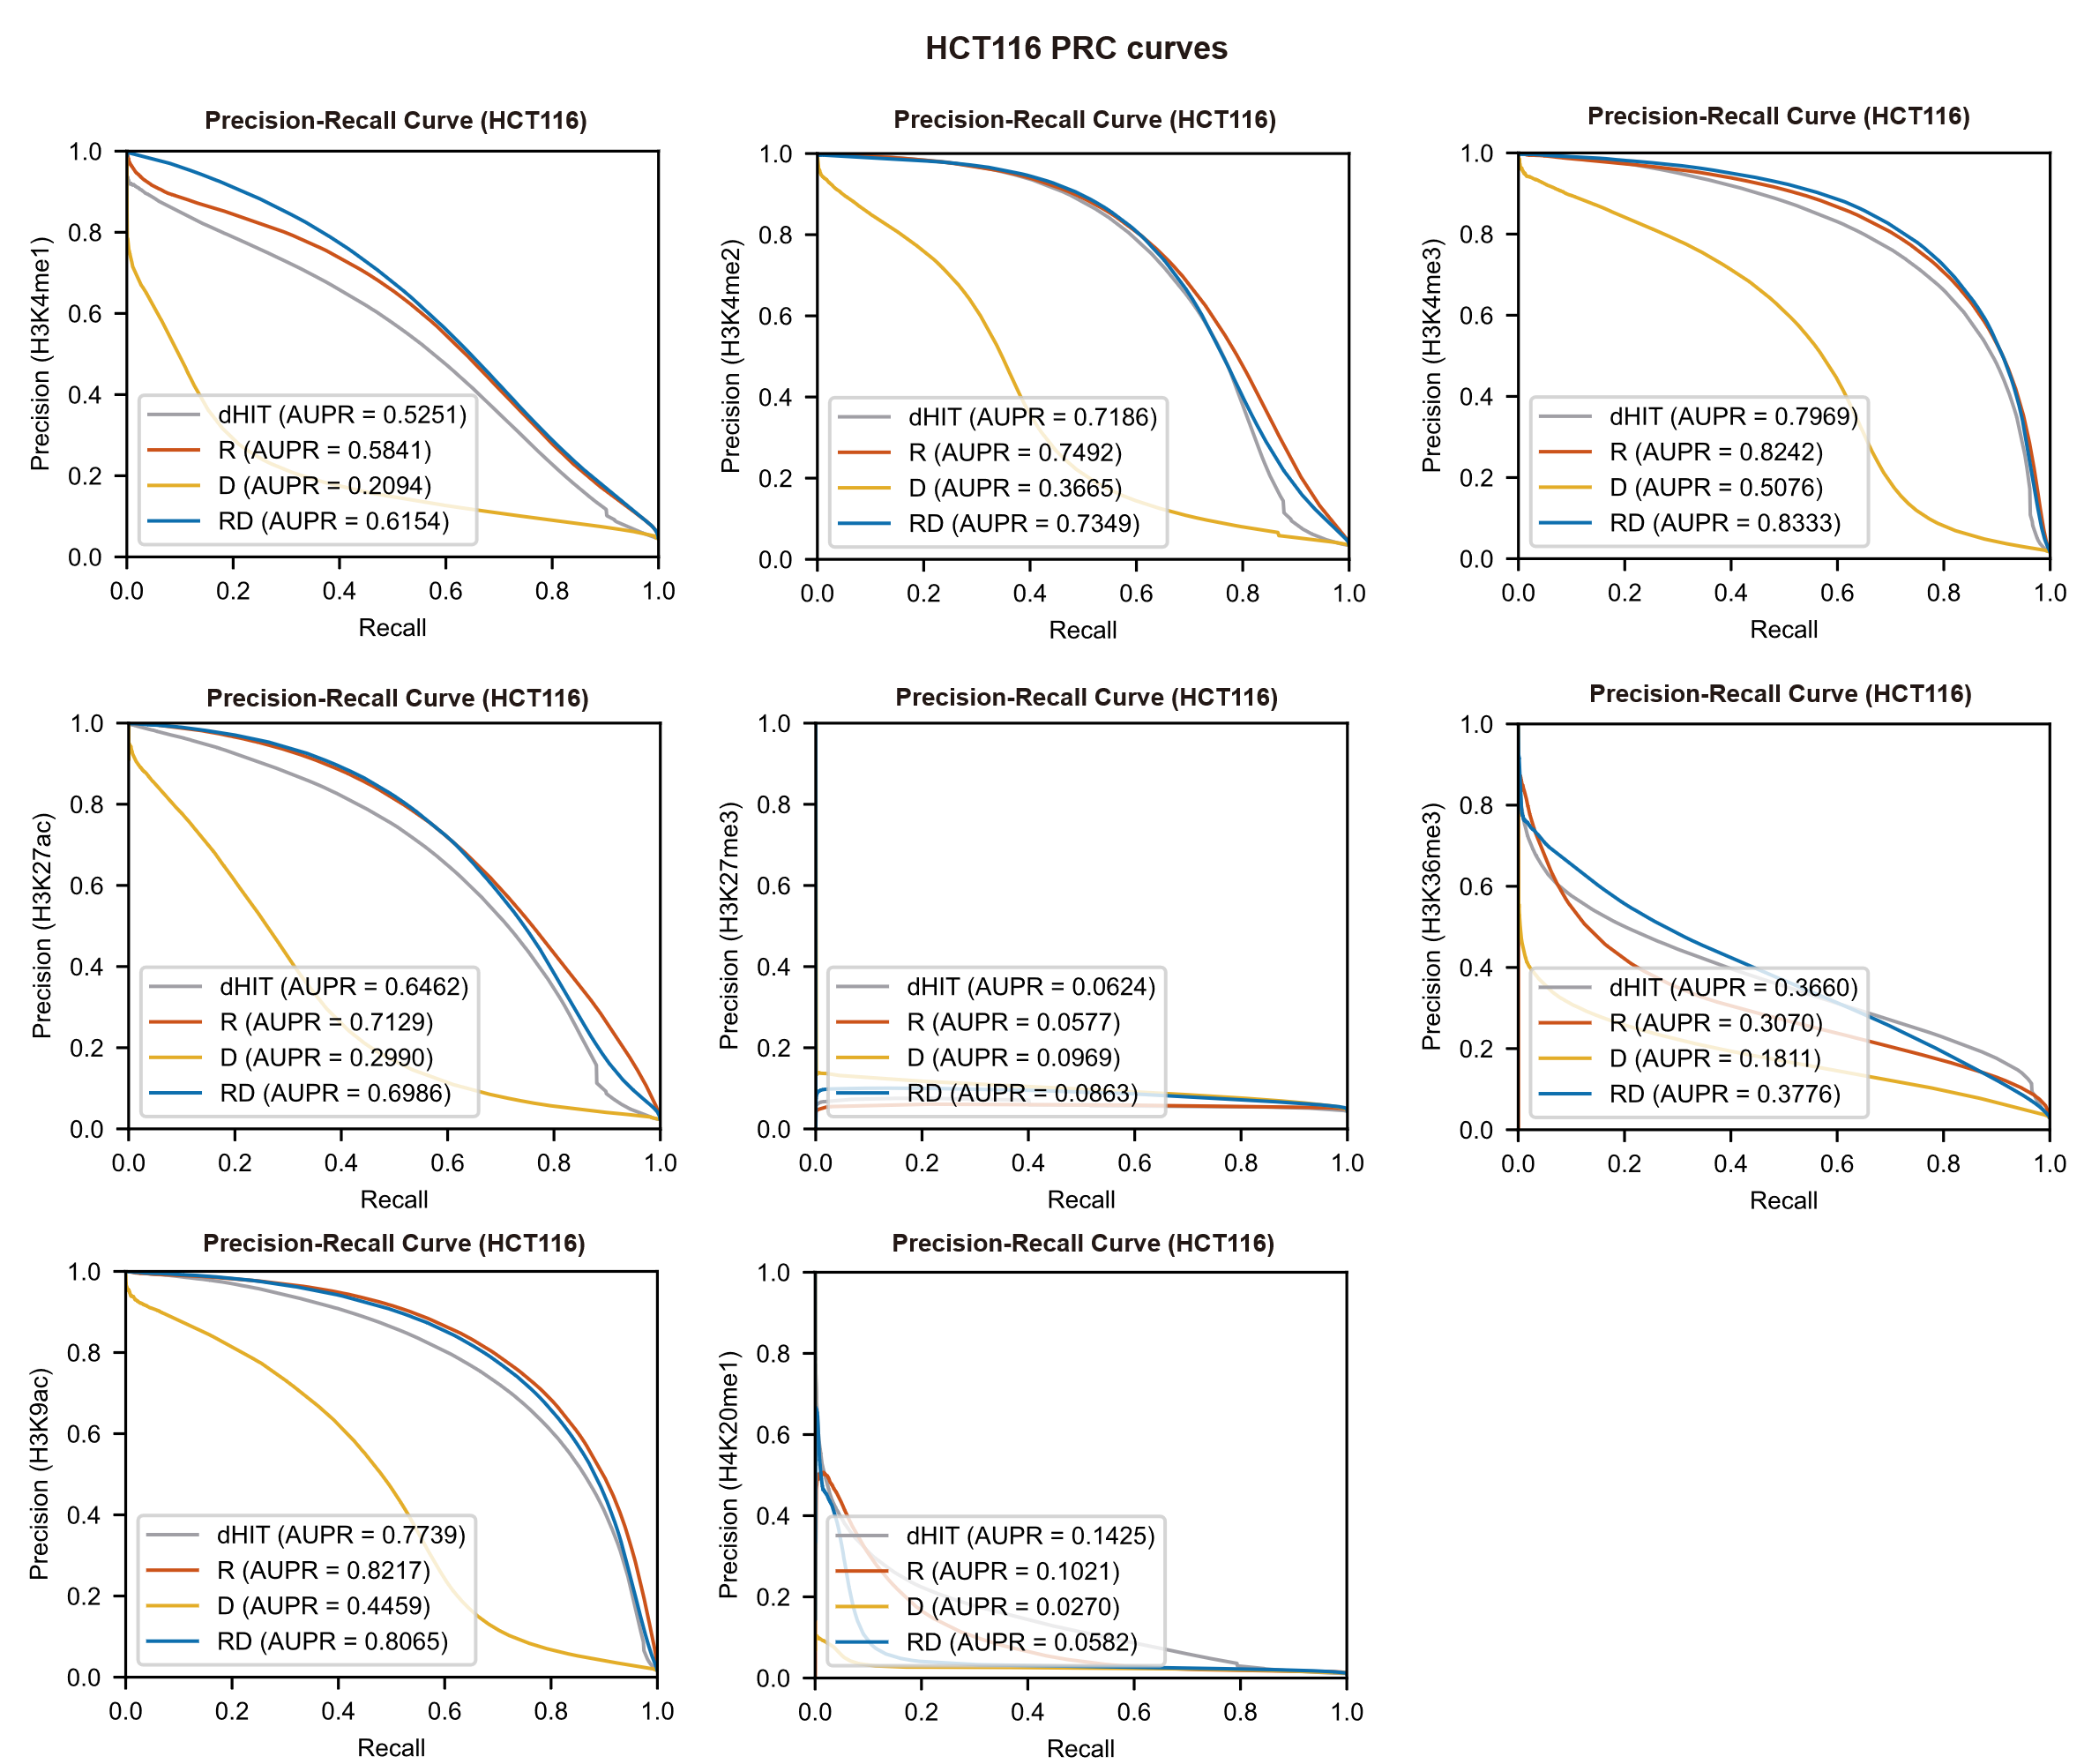


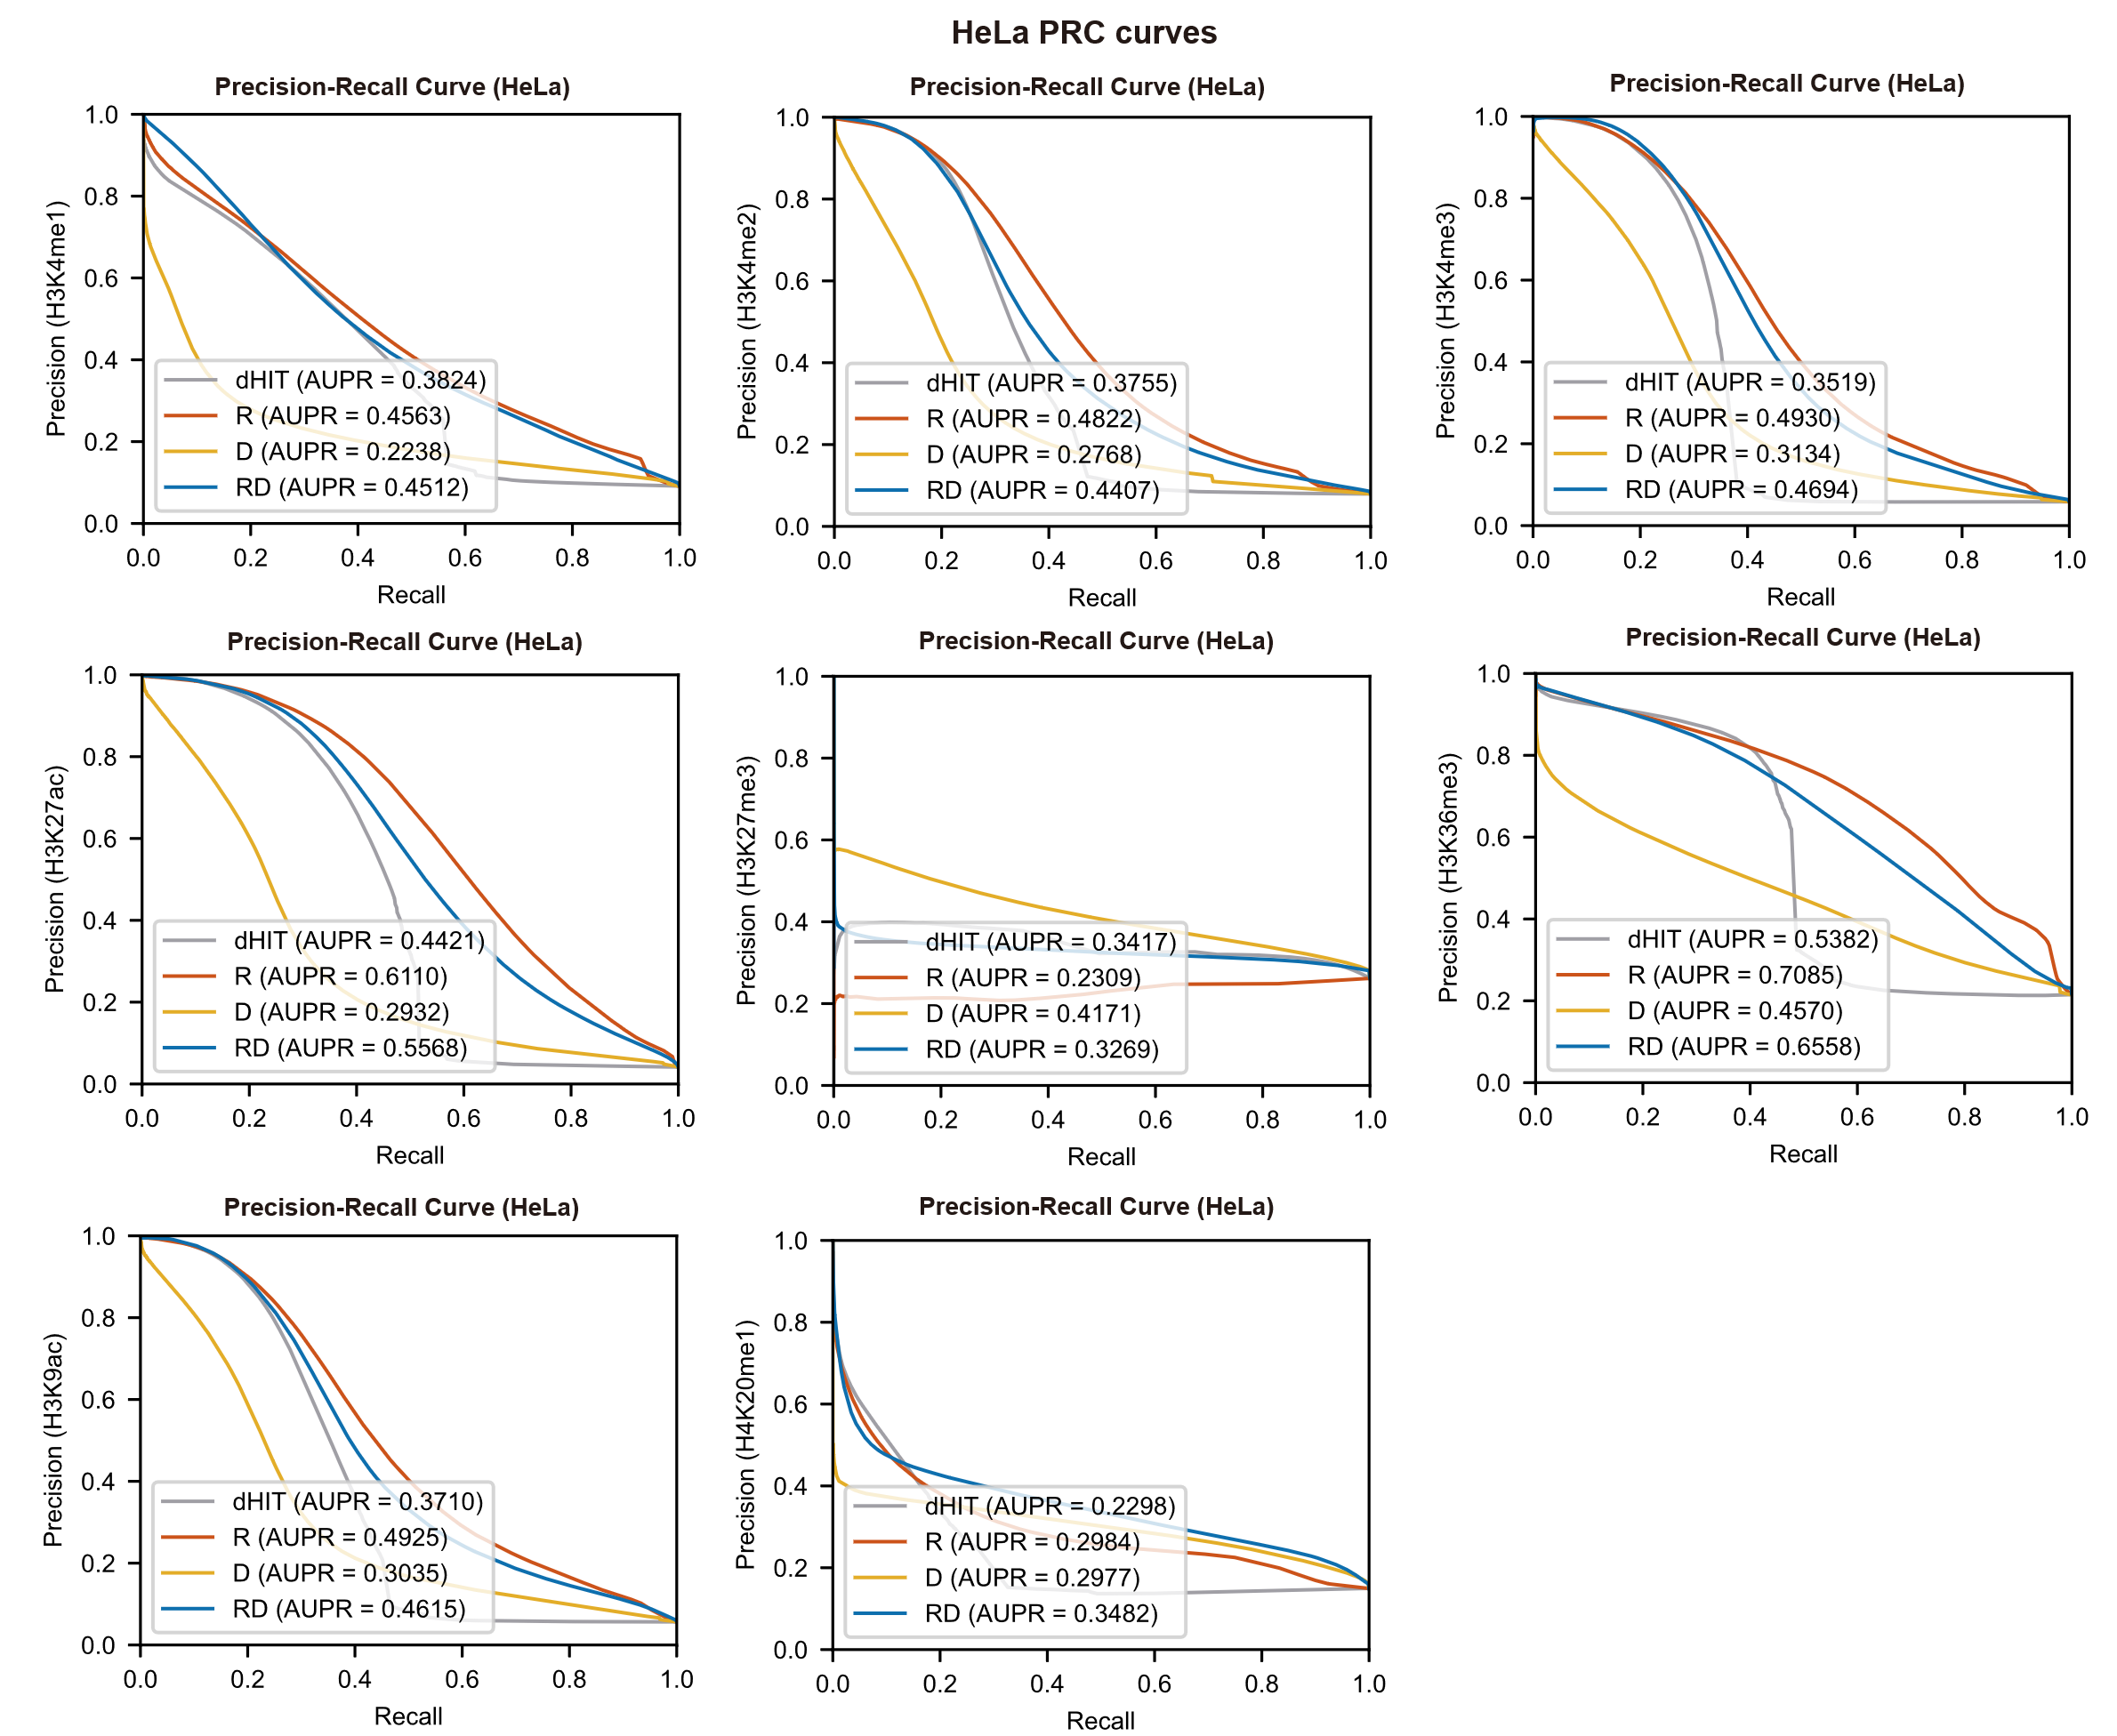


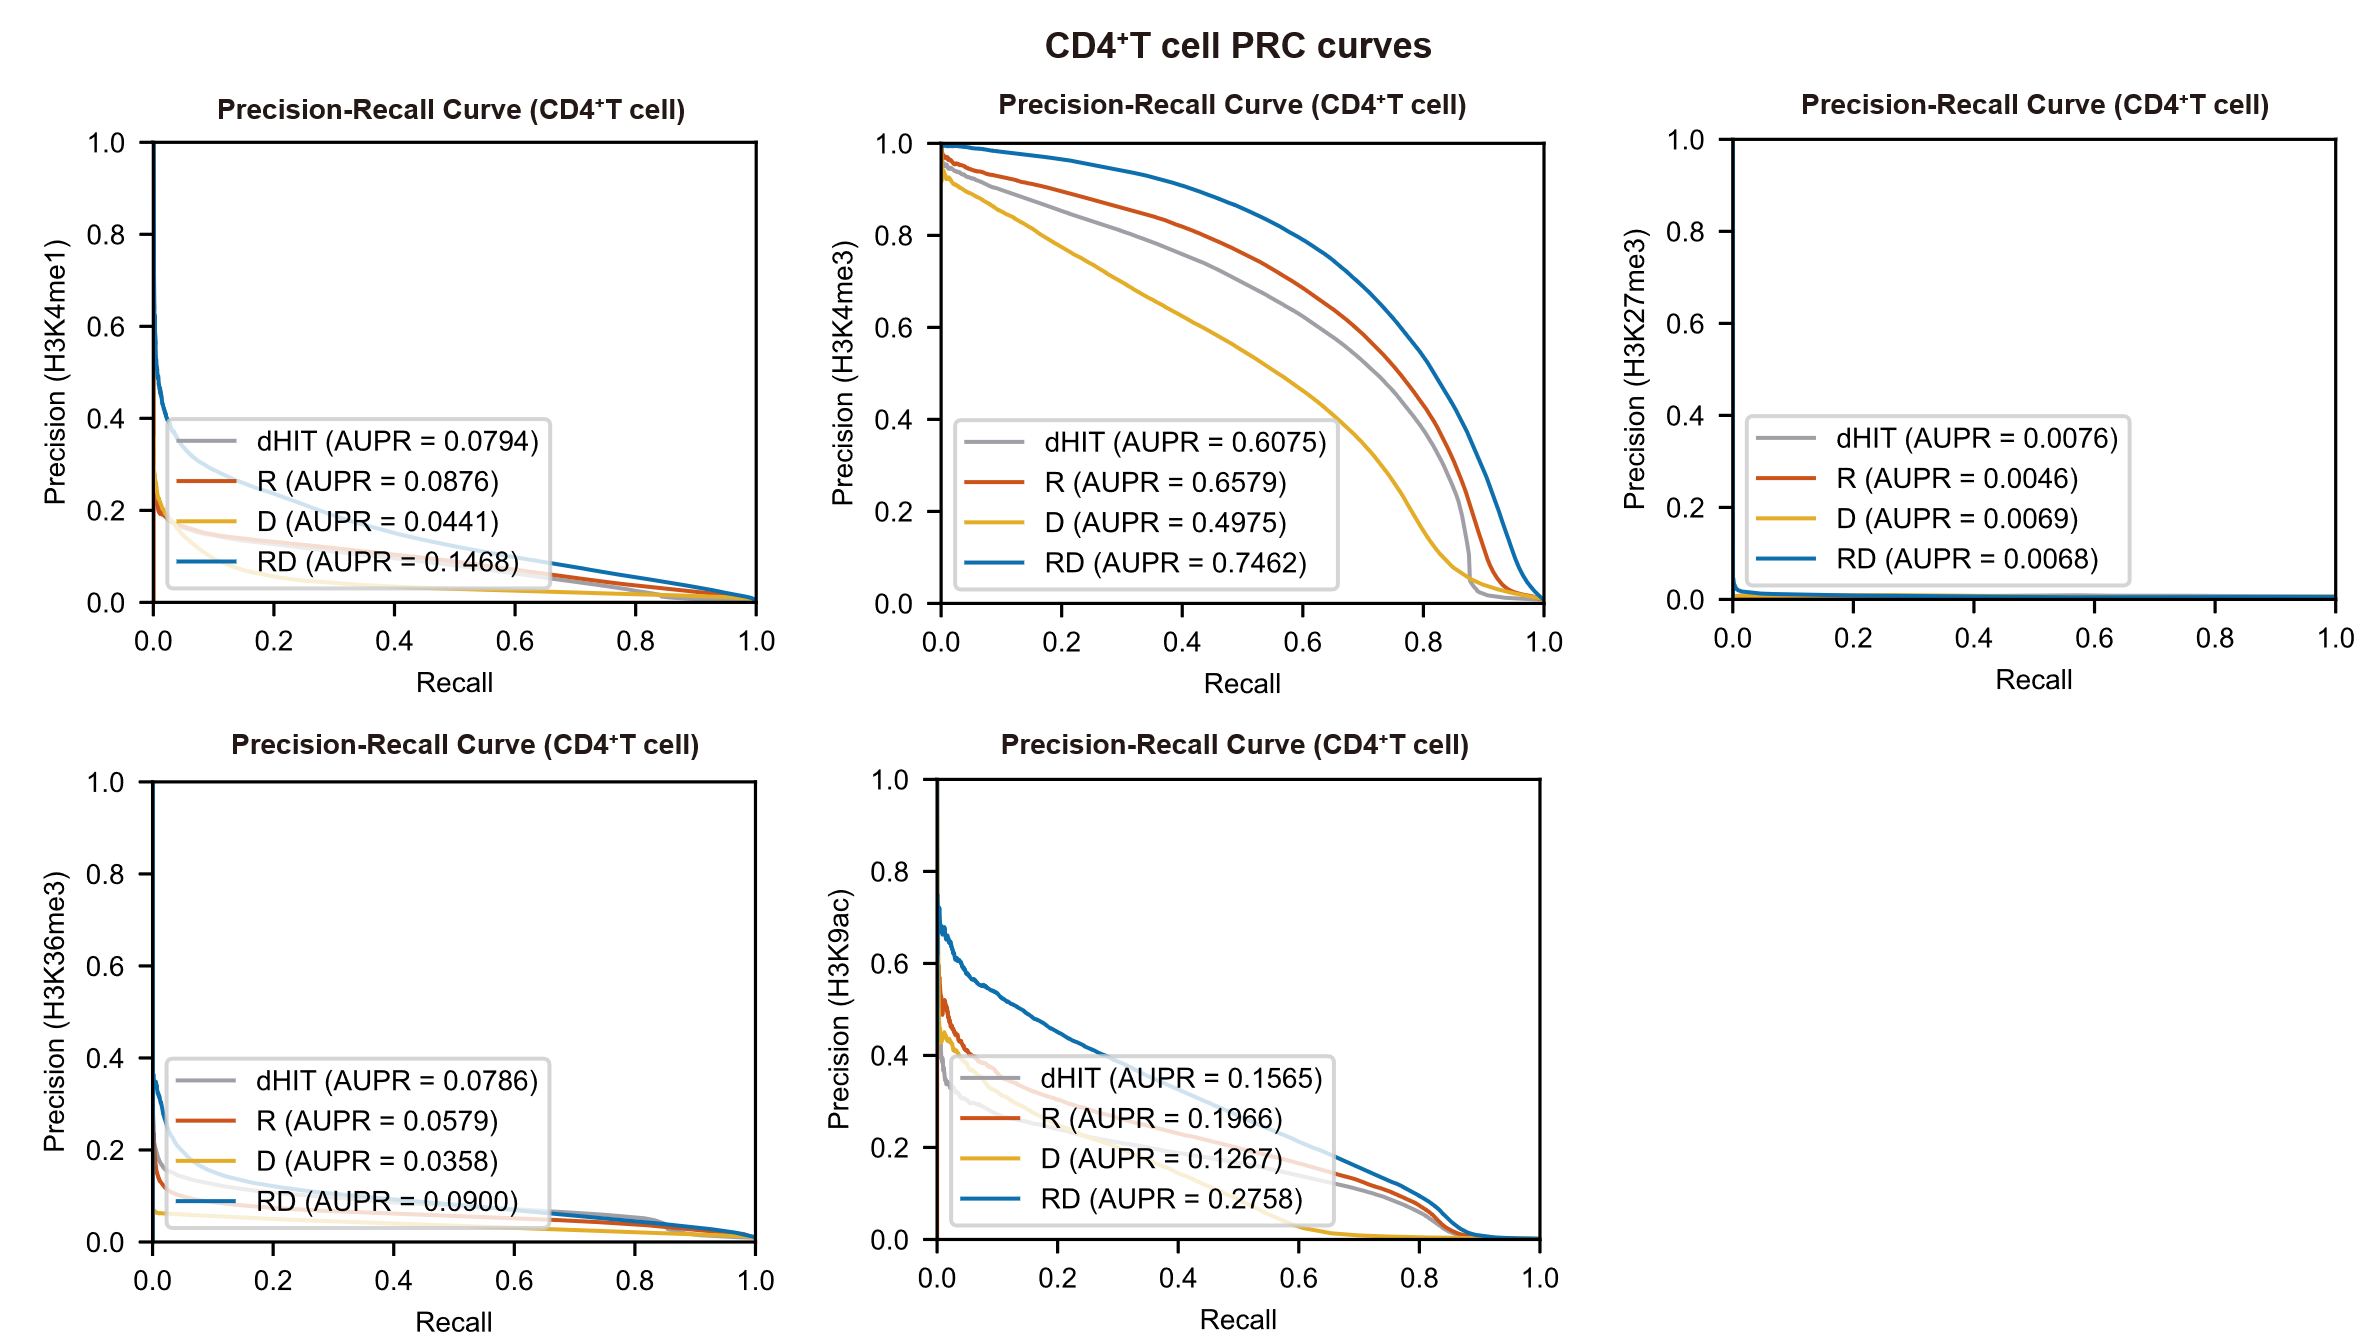


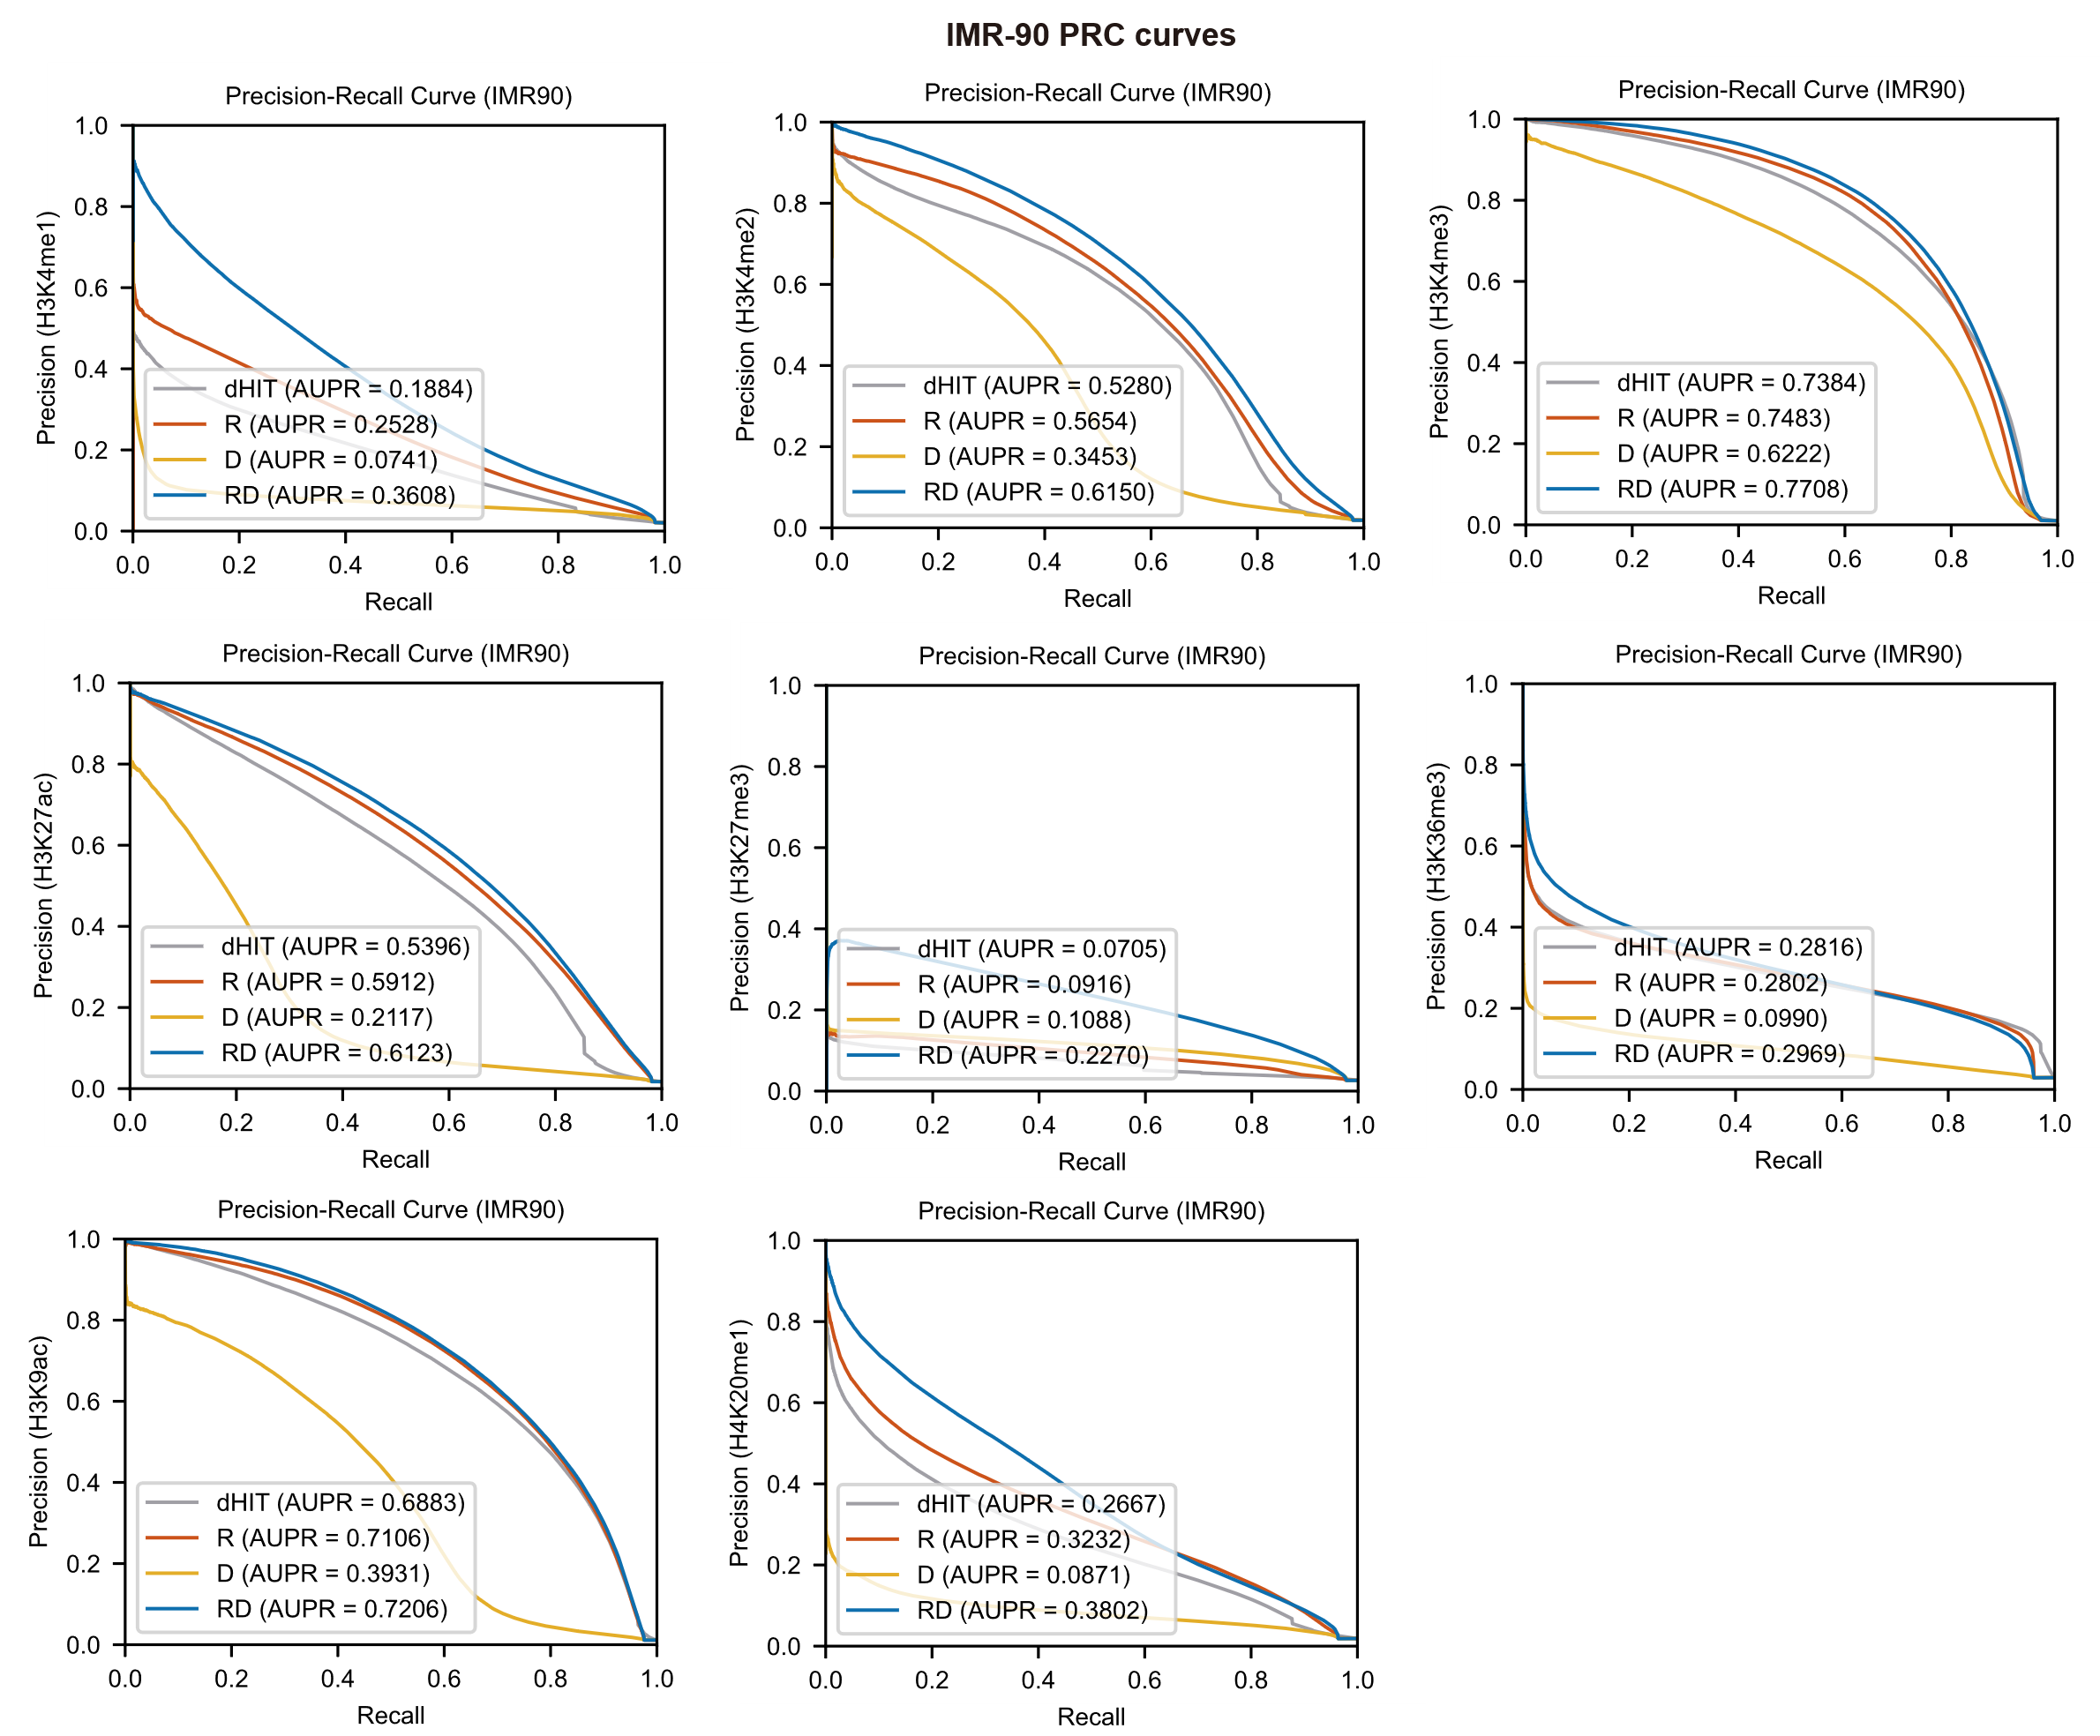


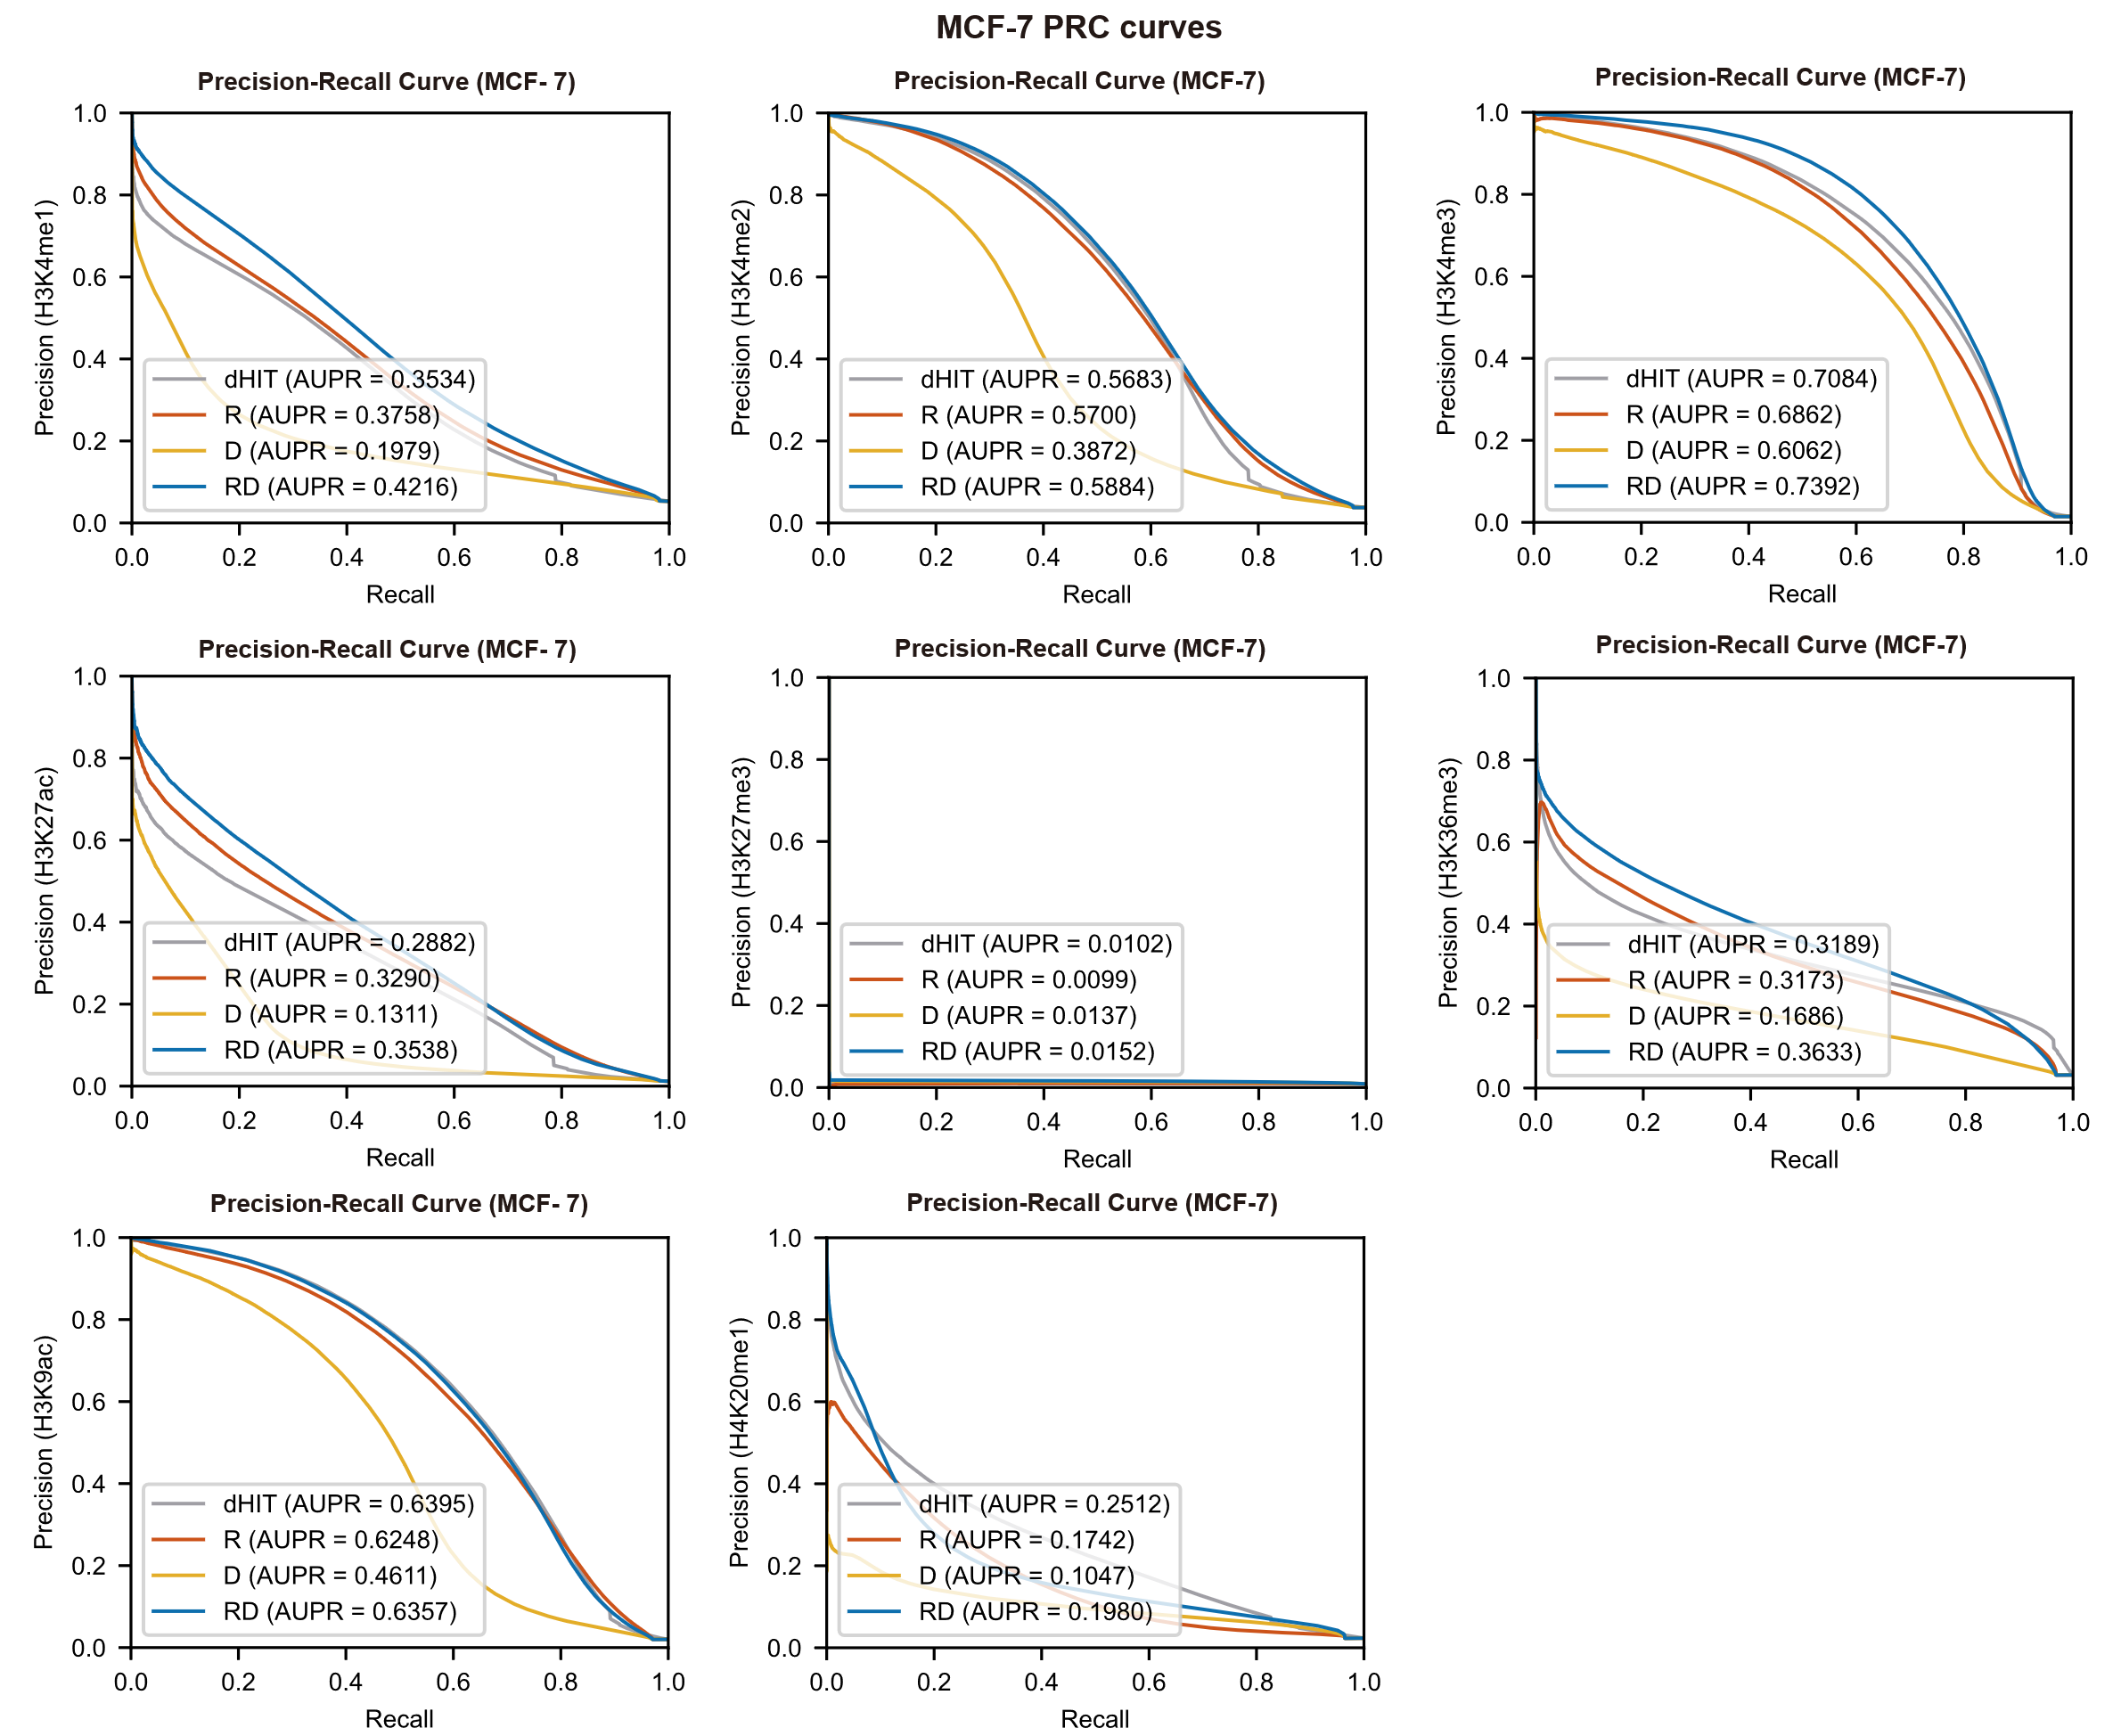


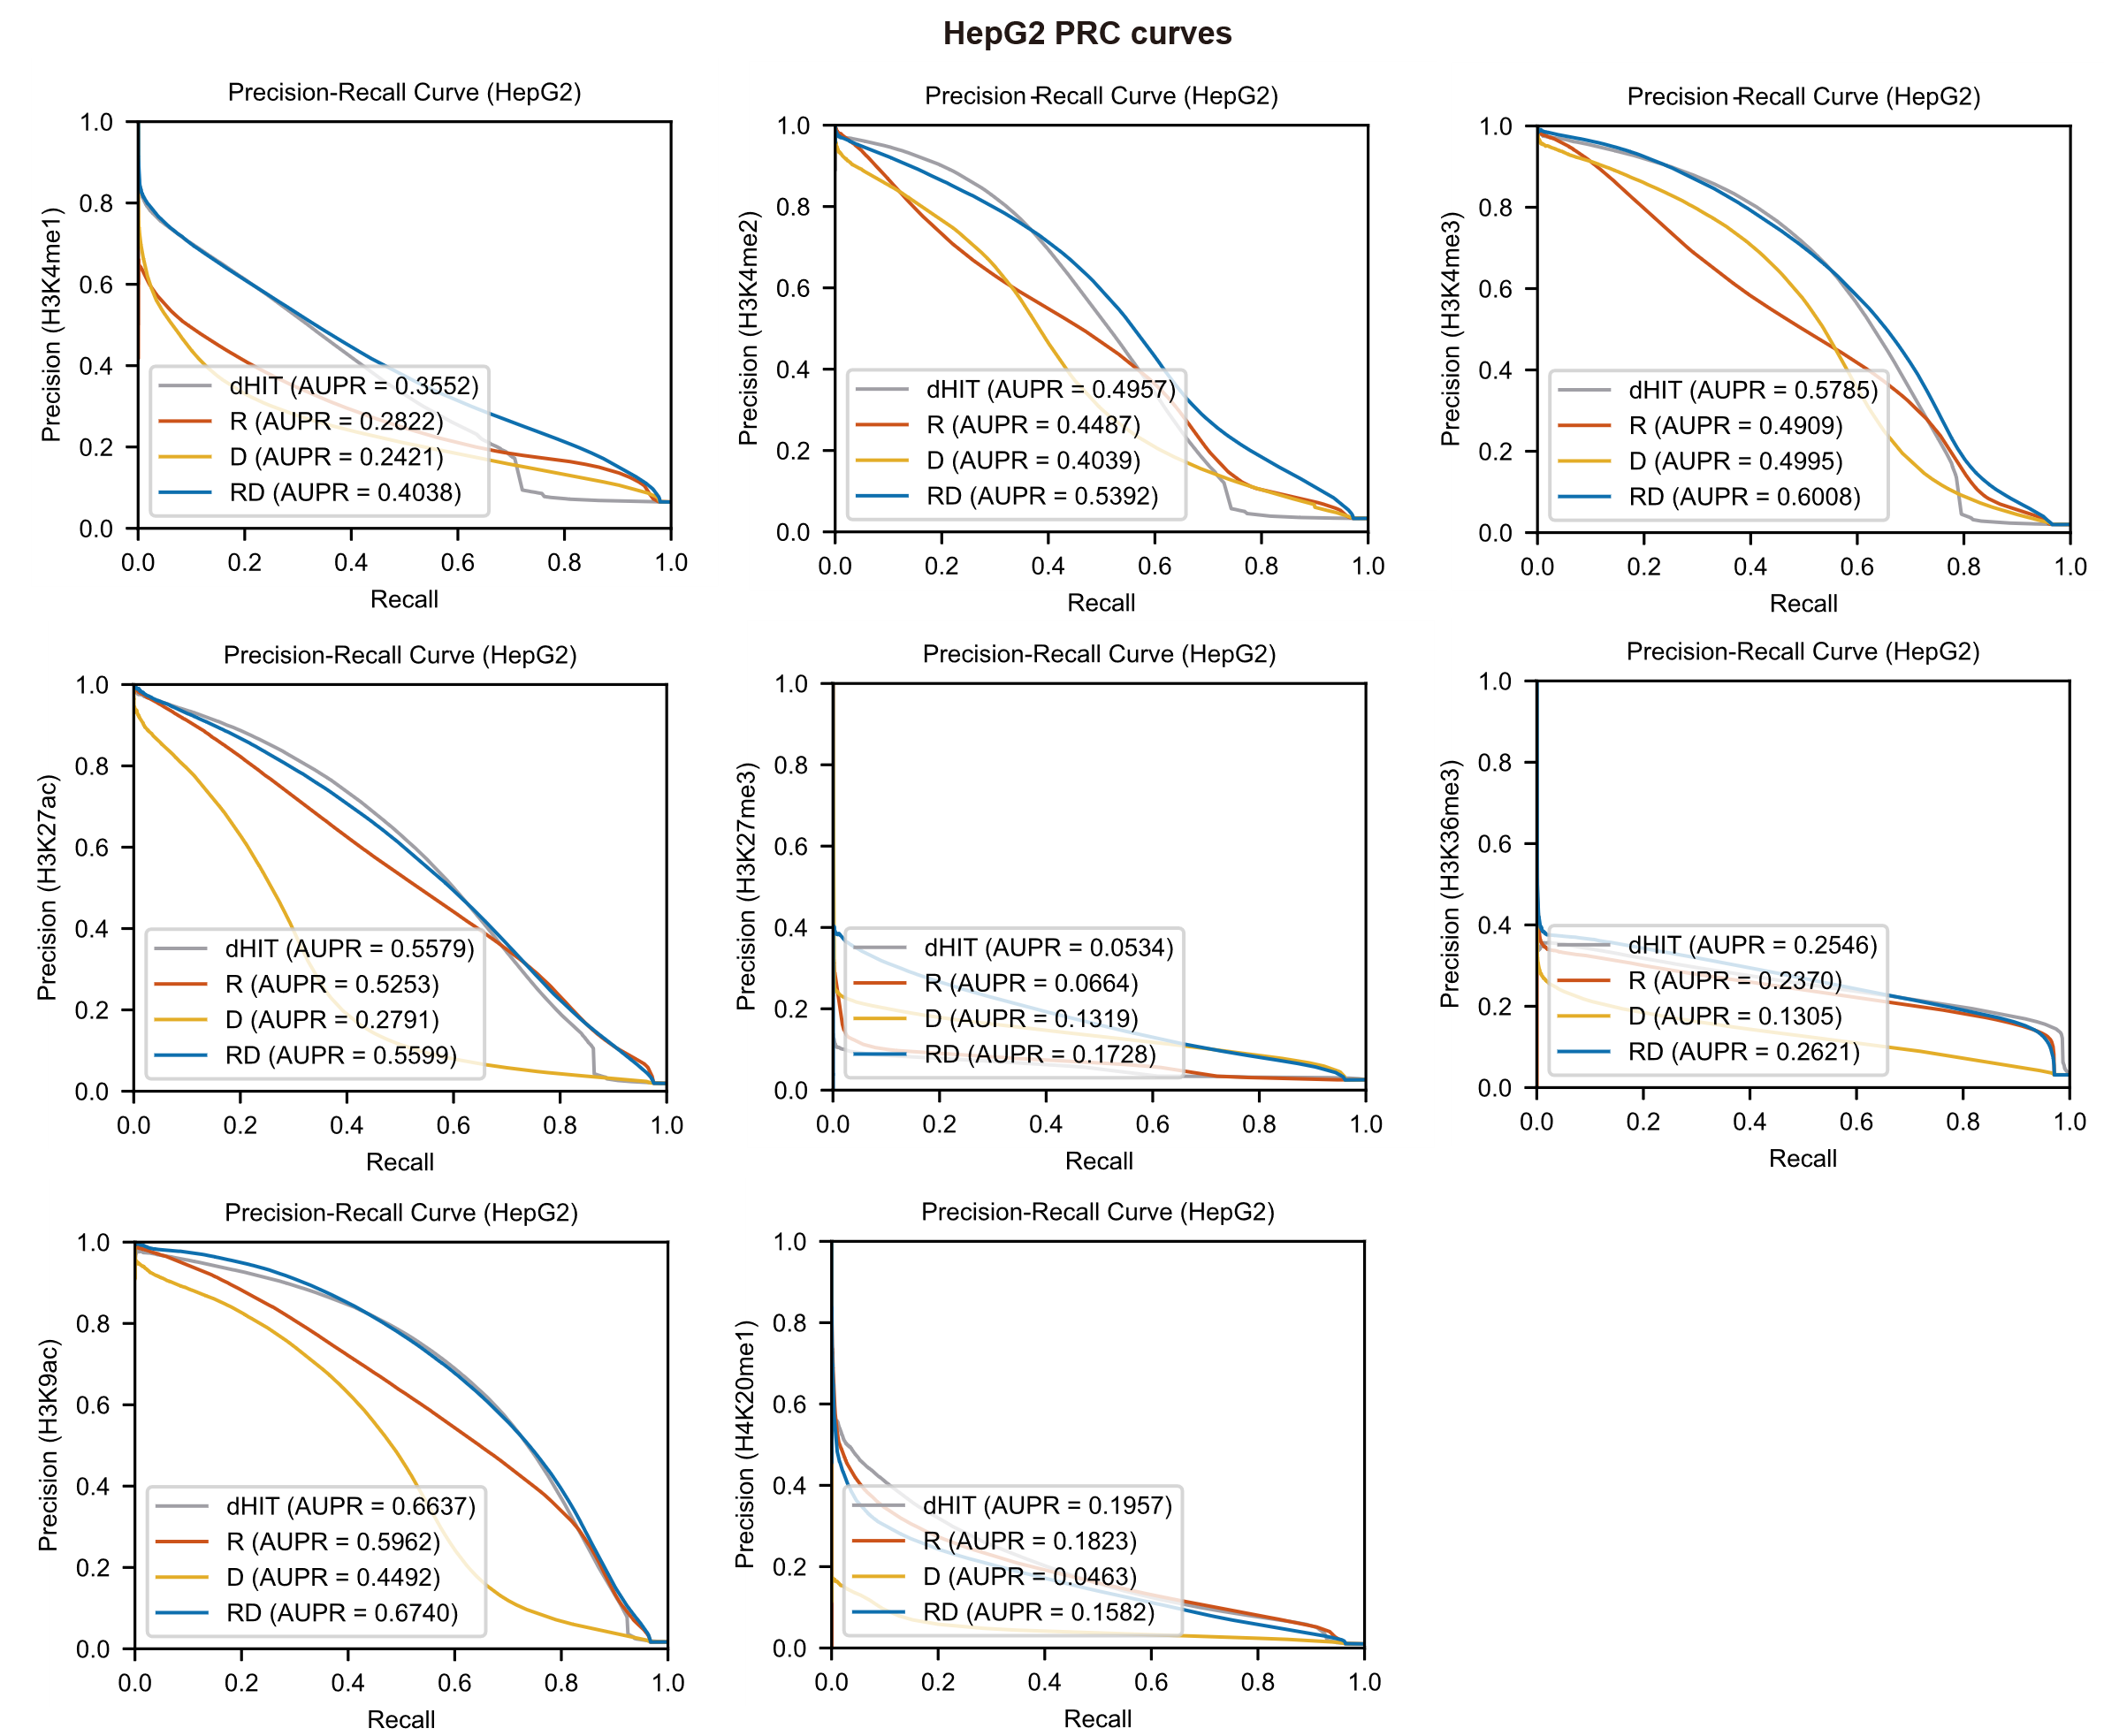


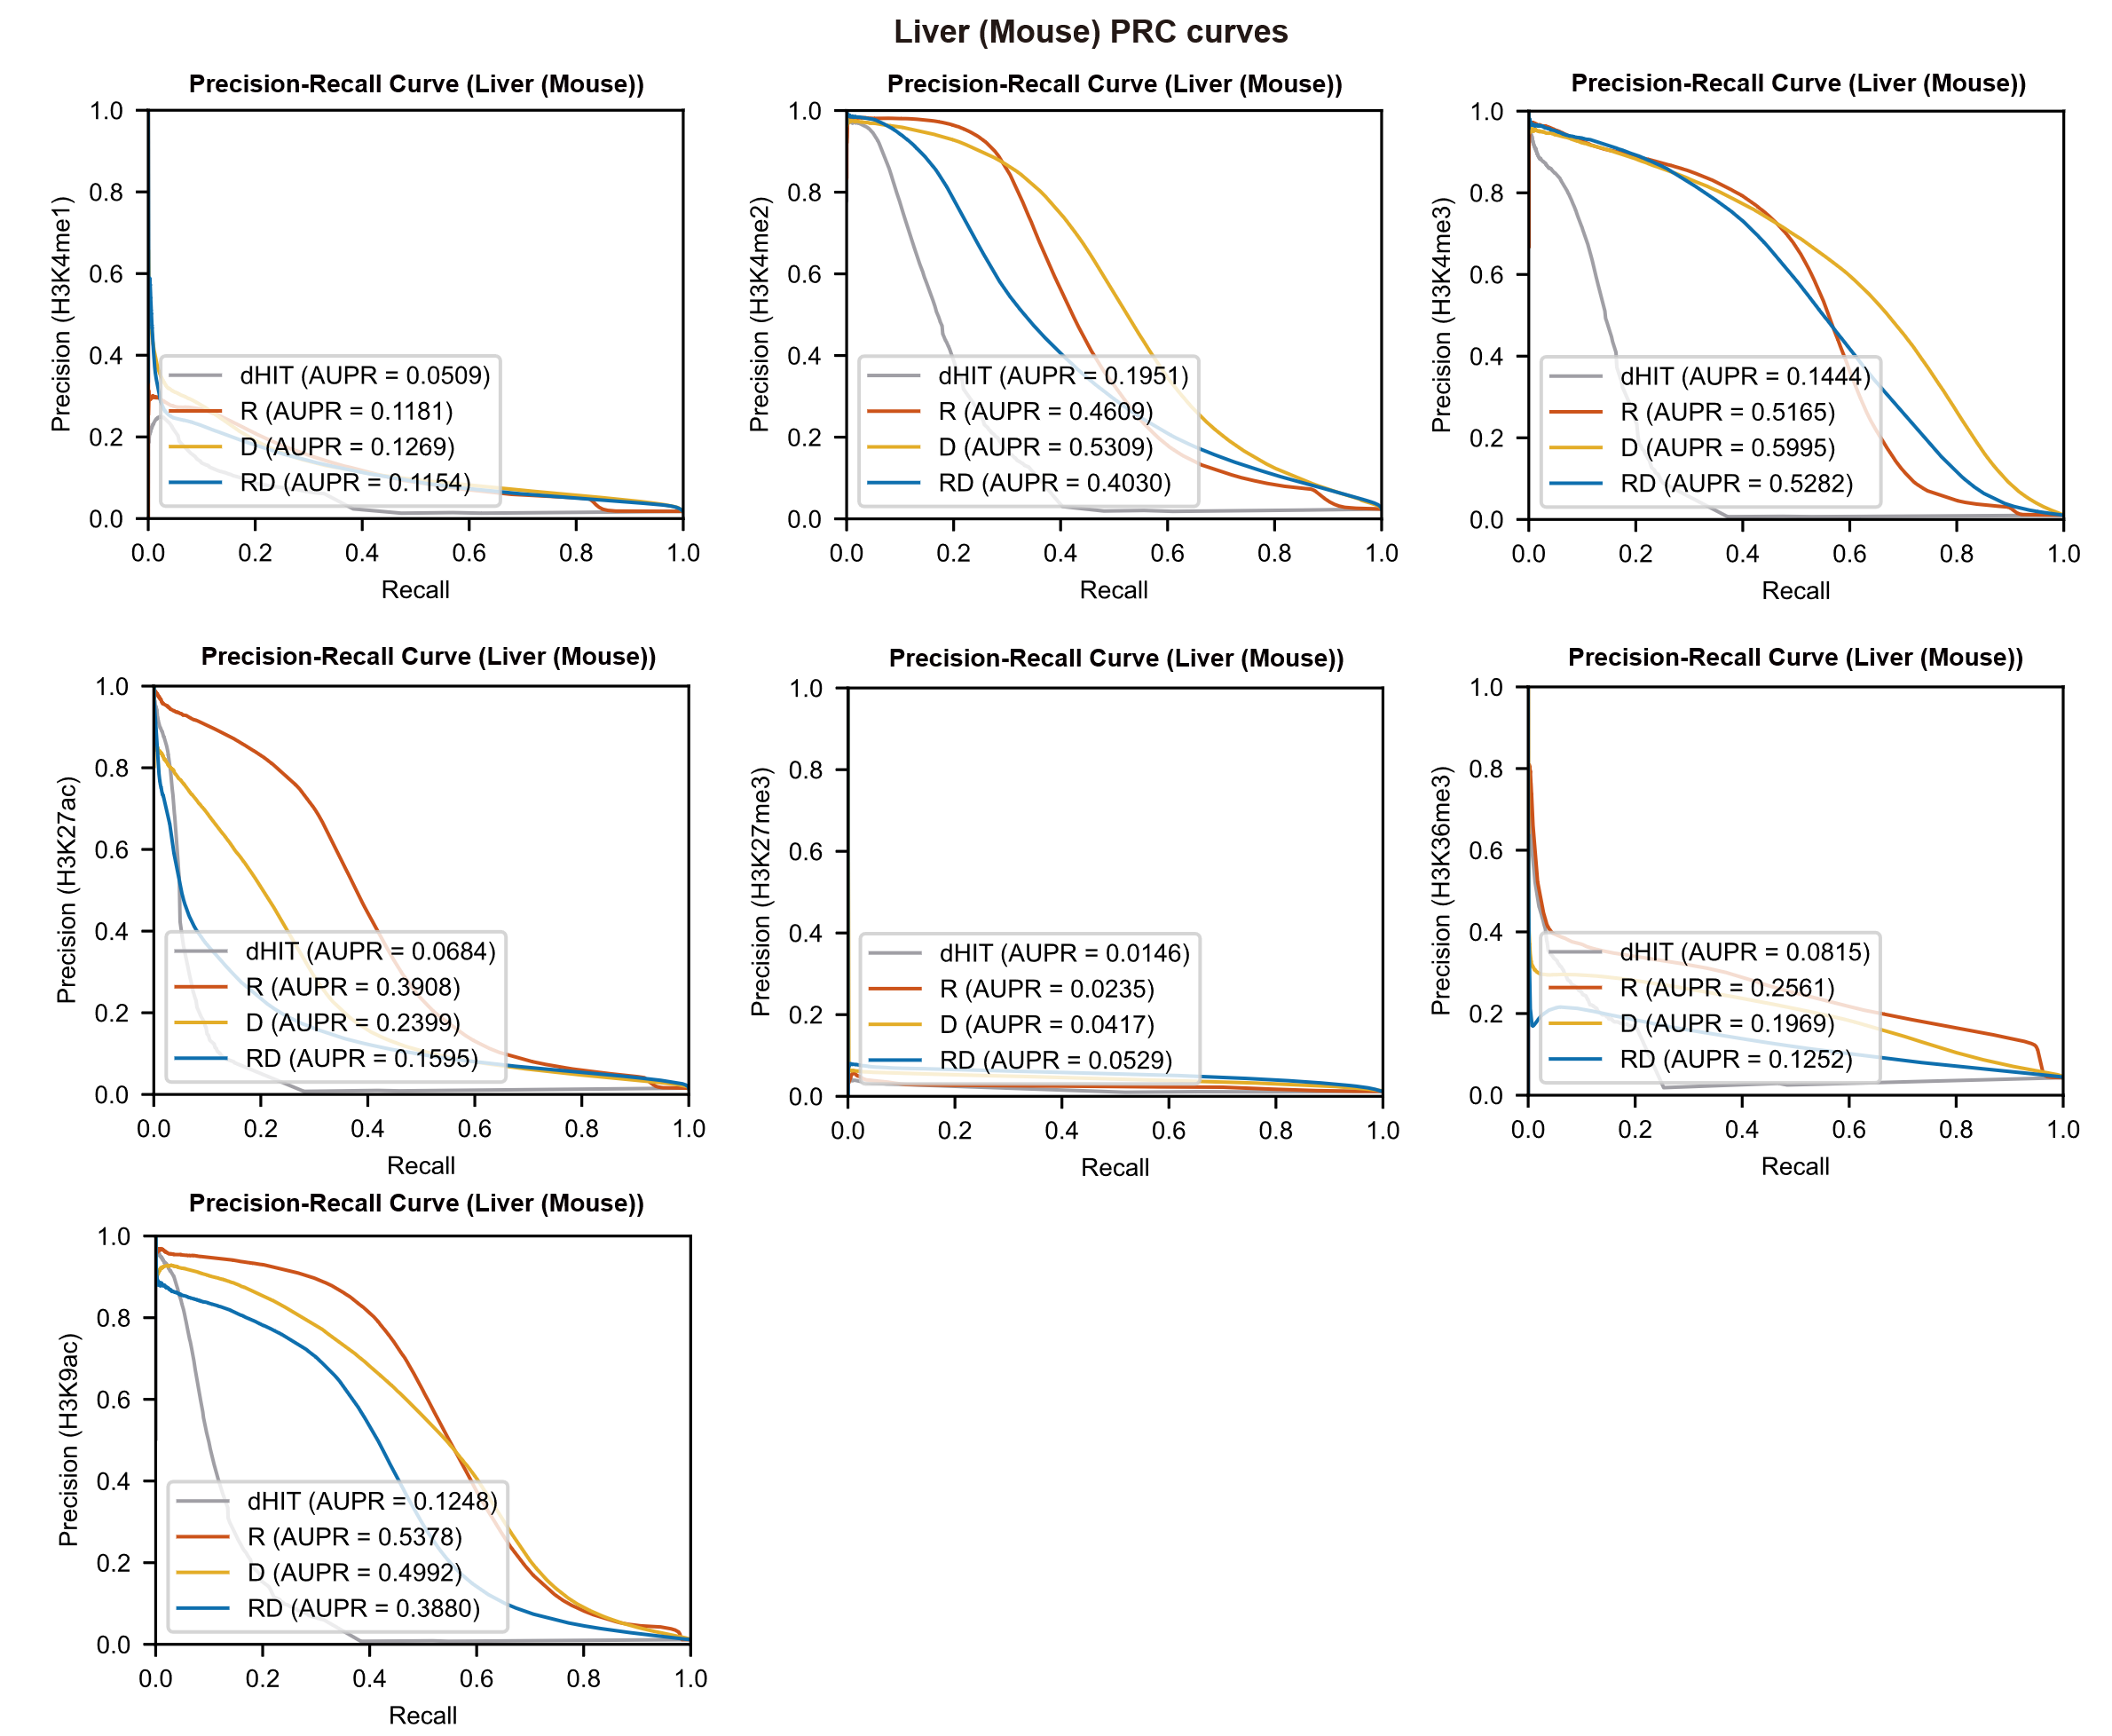


**Supplementary Figure S10: Comparison of PR curves among RD, D, R, and the dHIT model.**


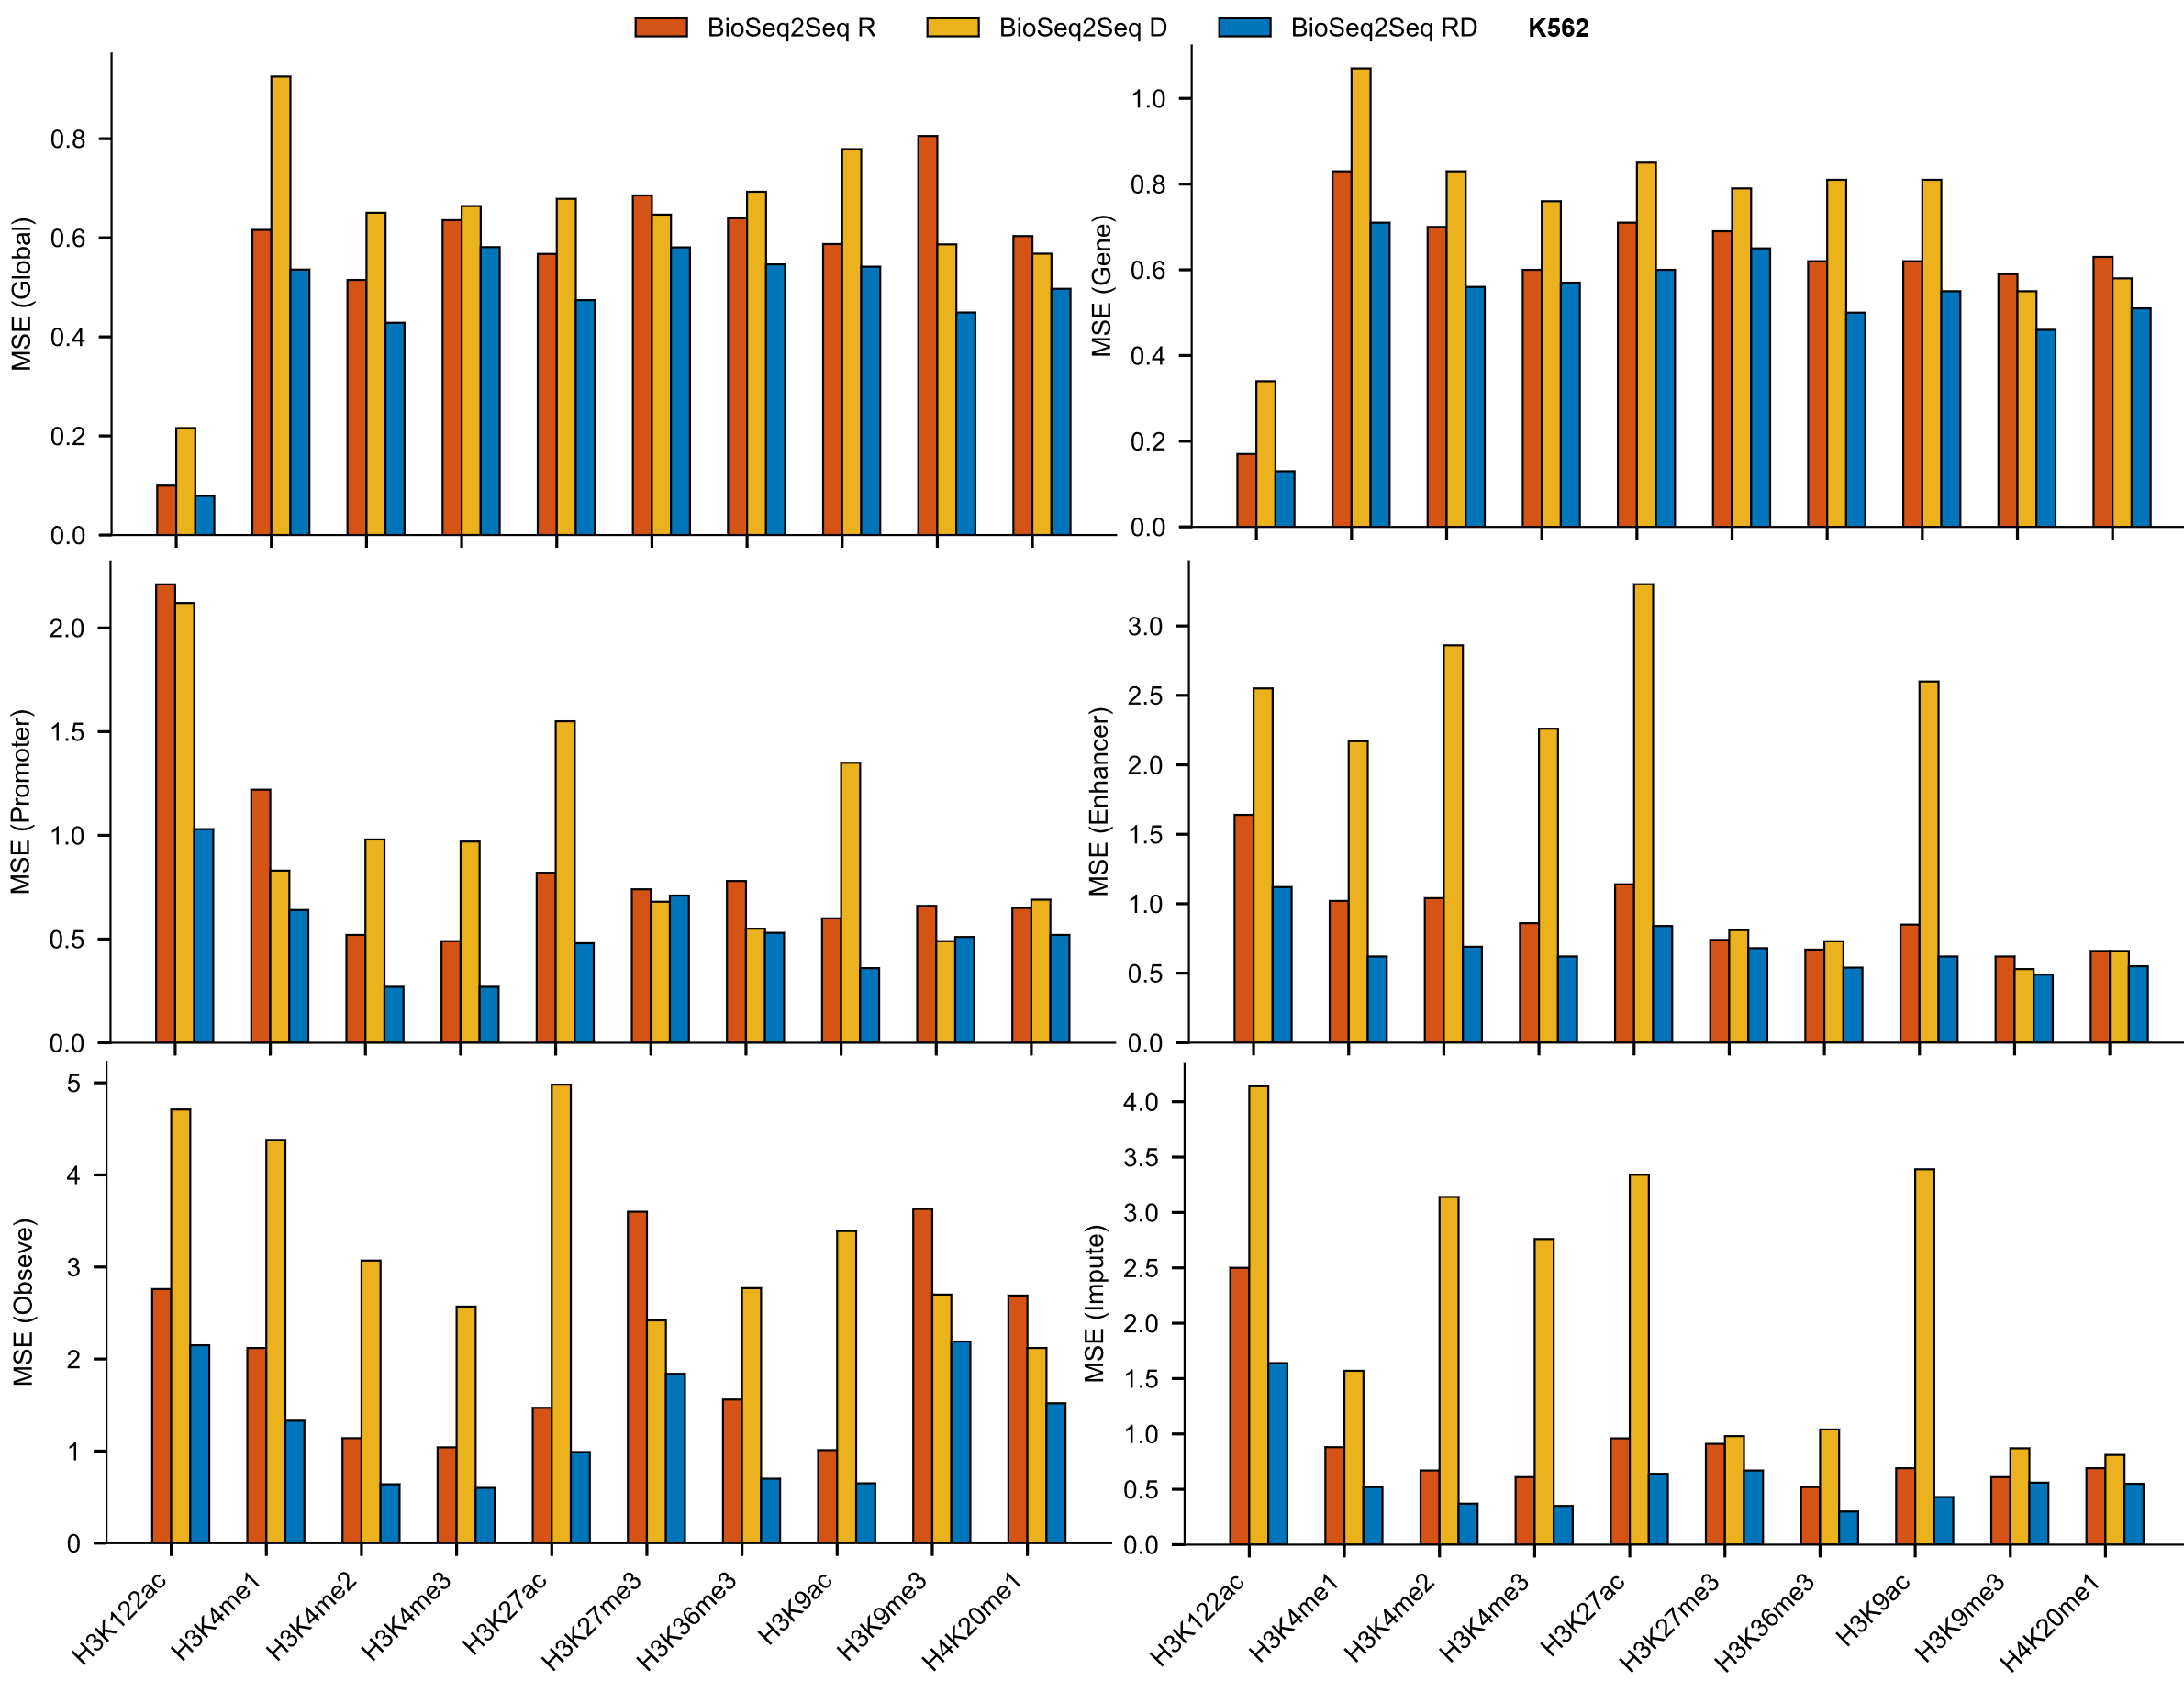


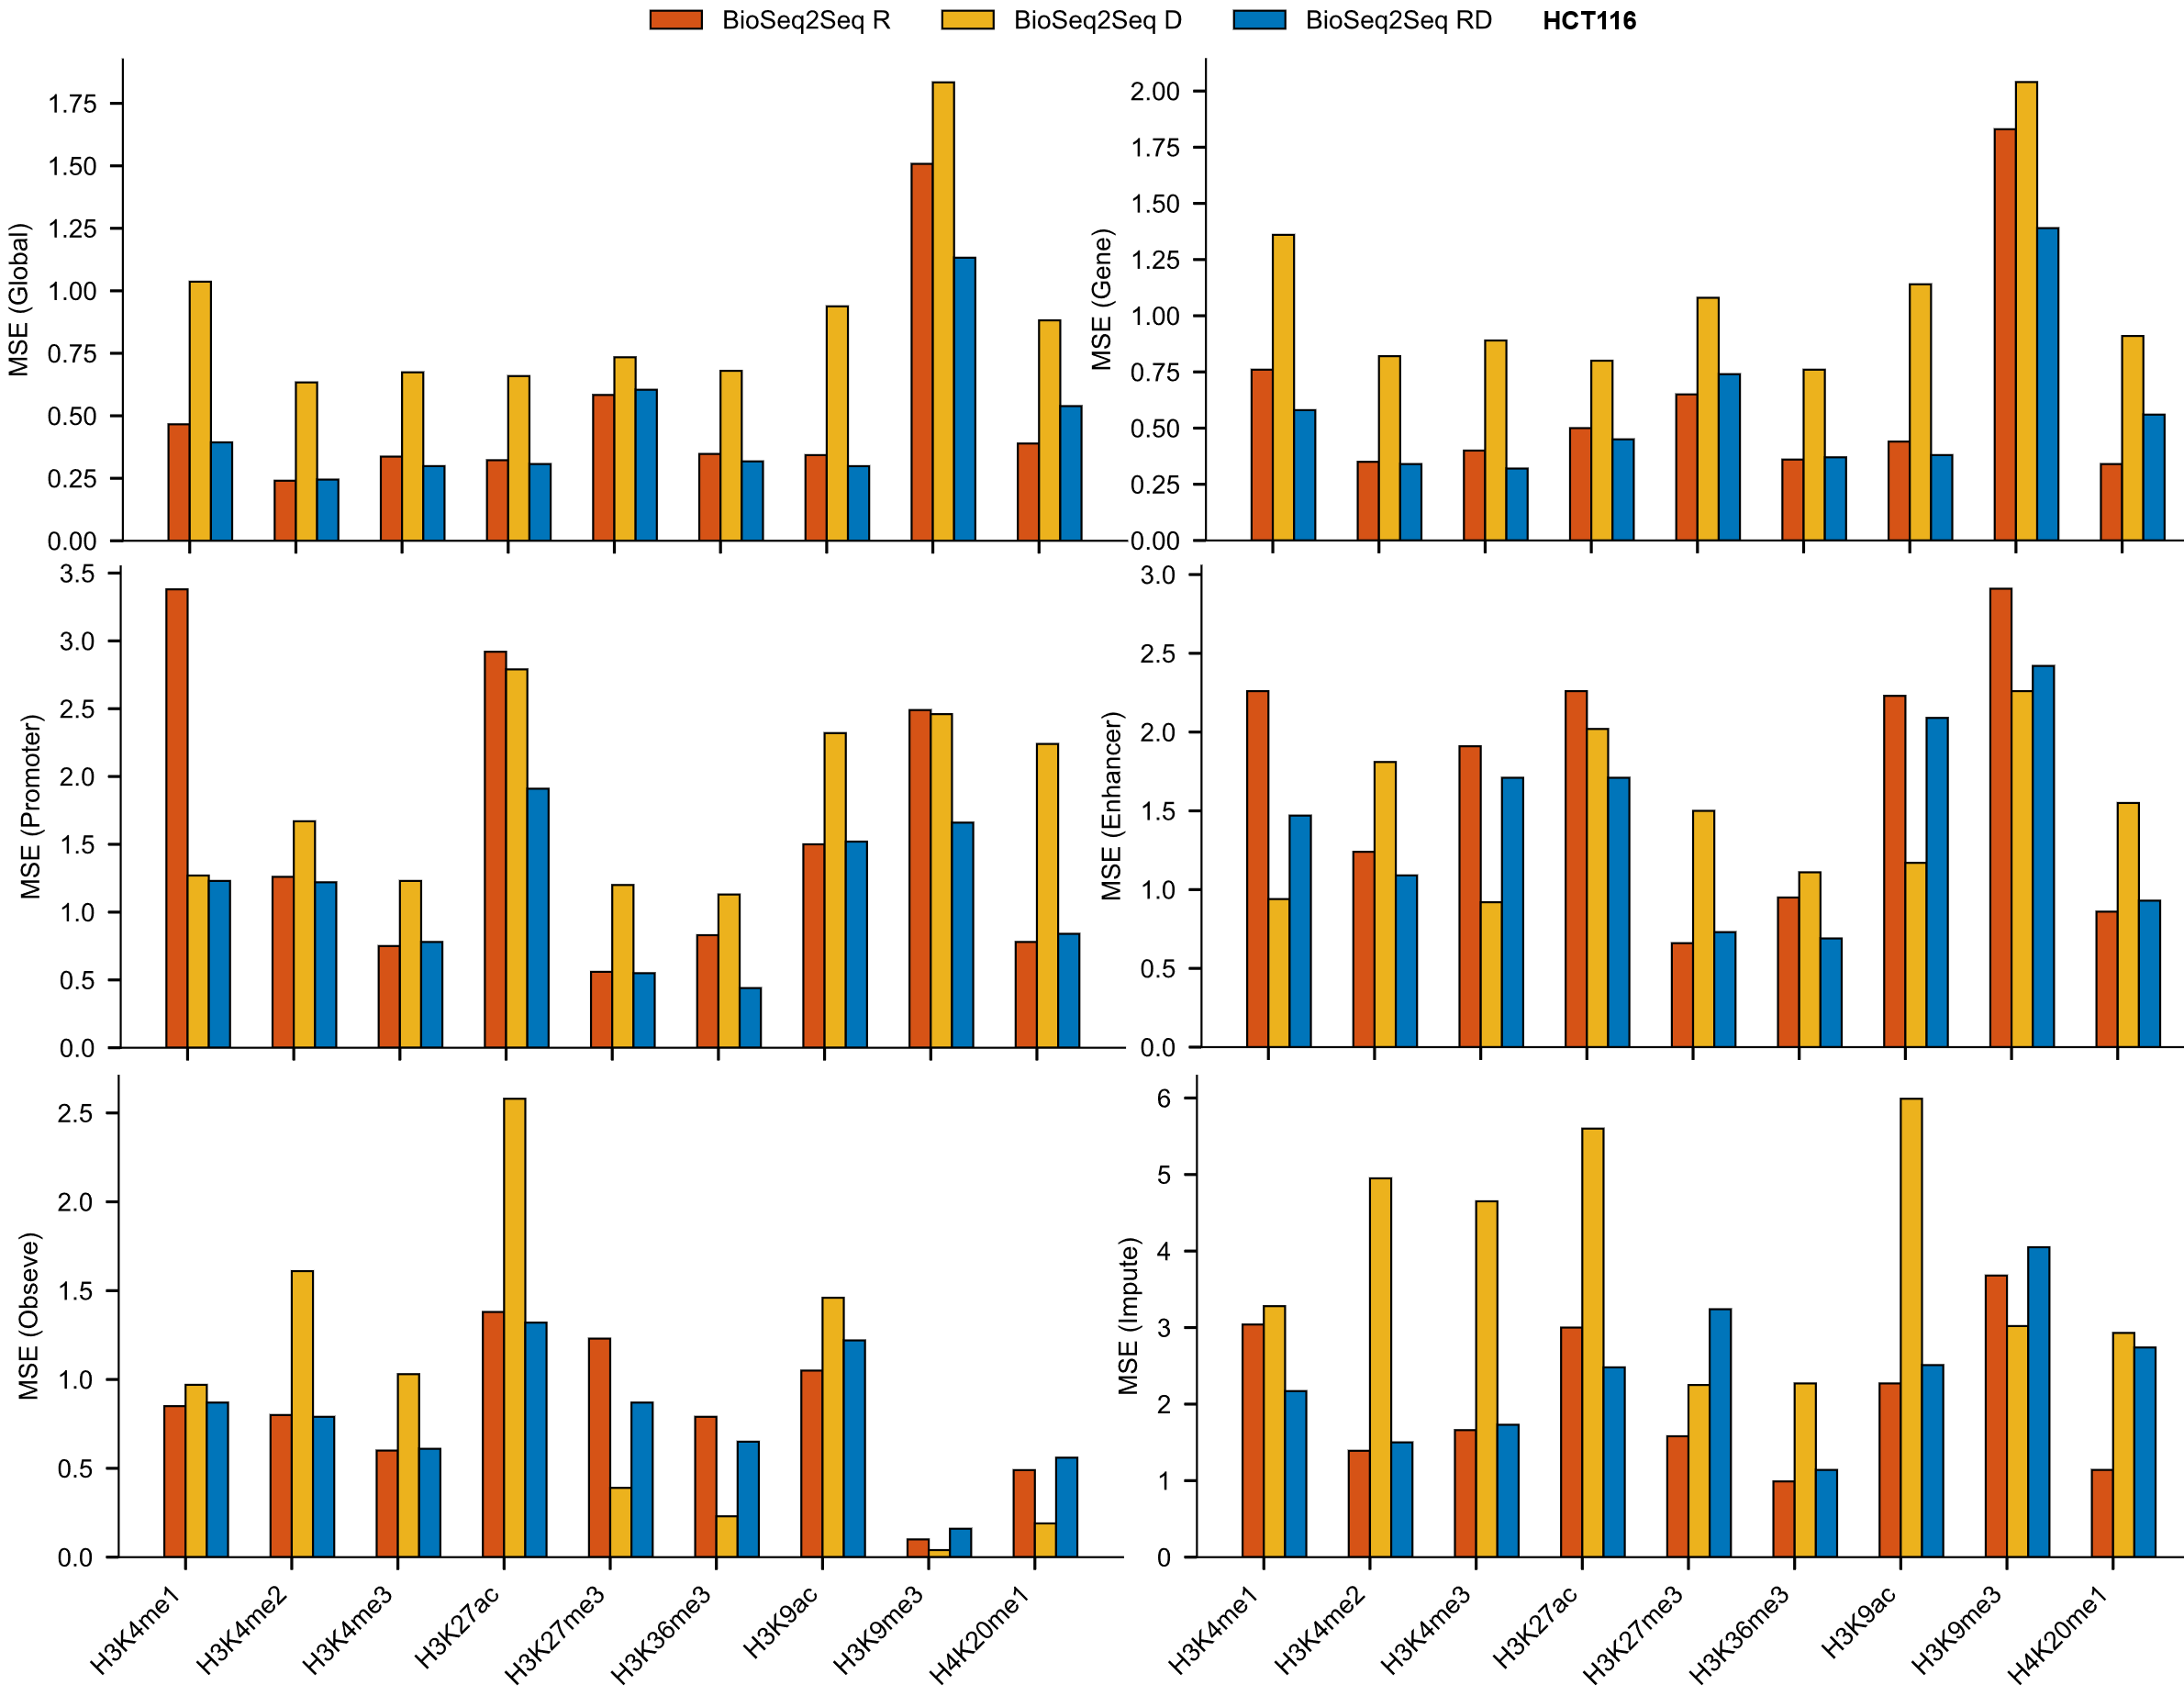


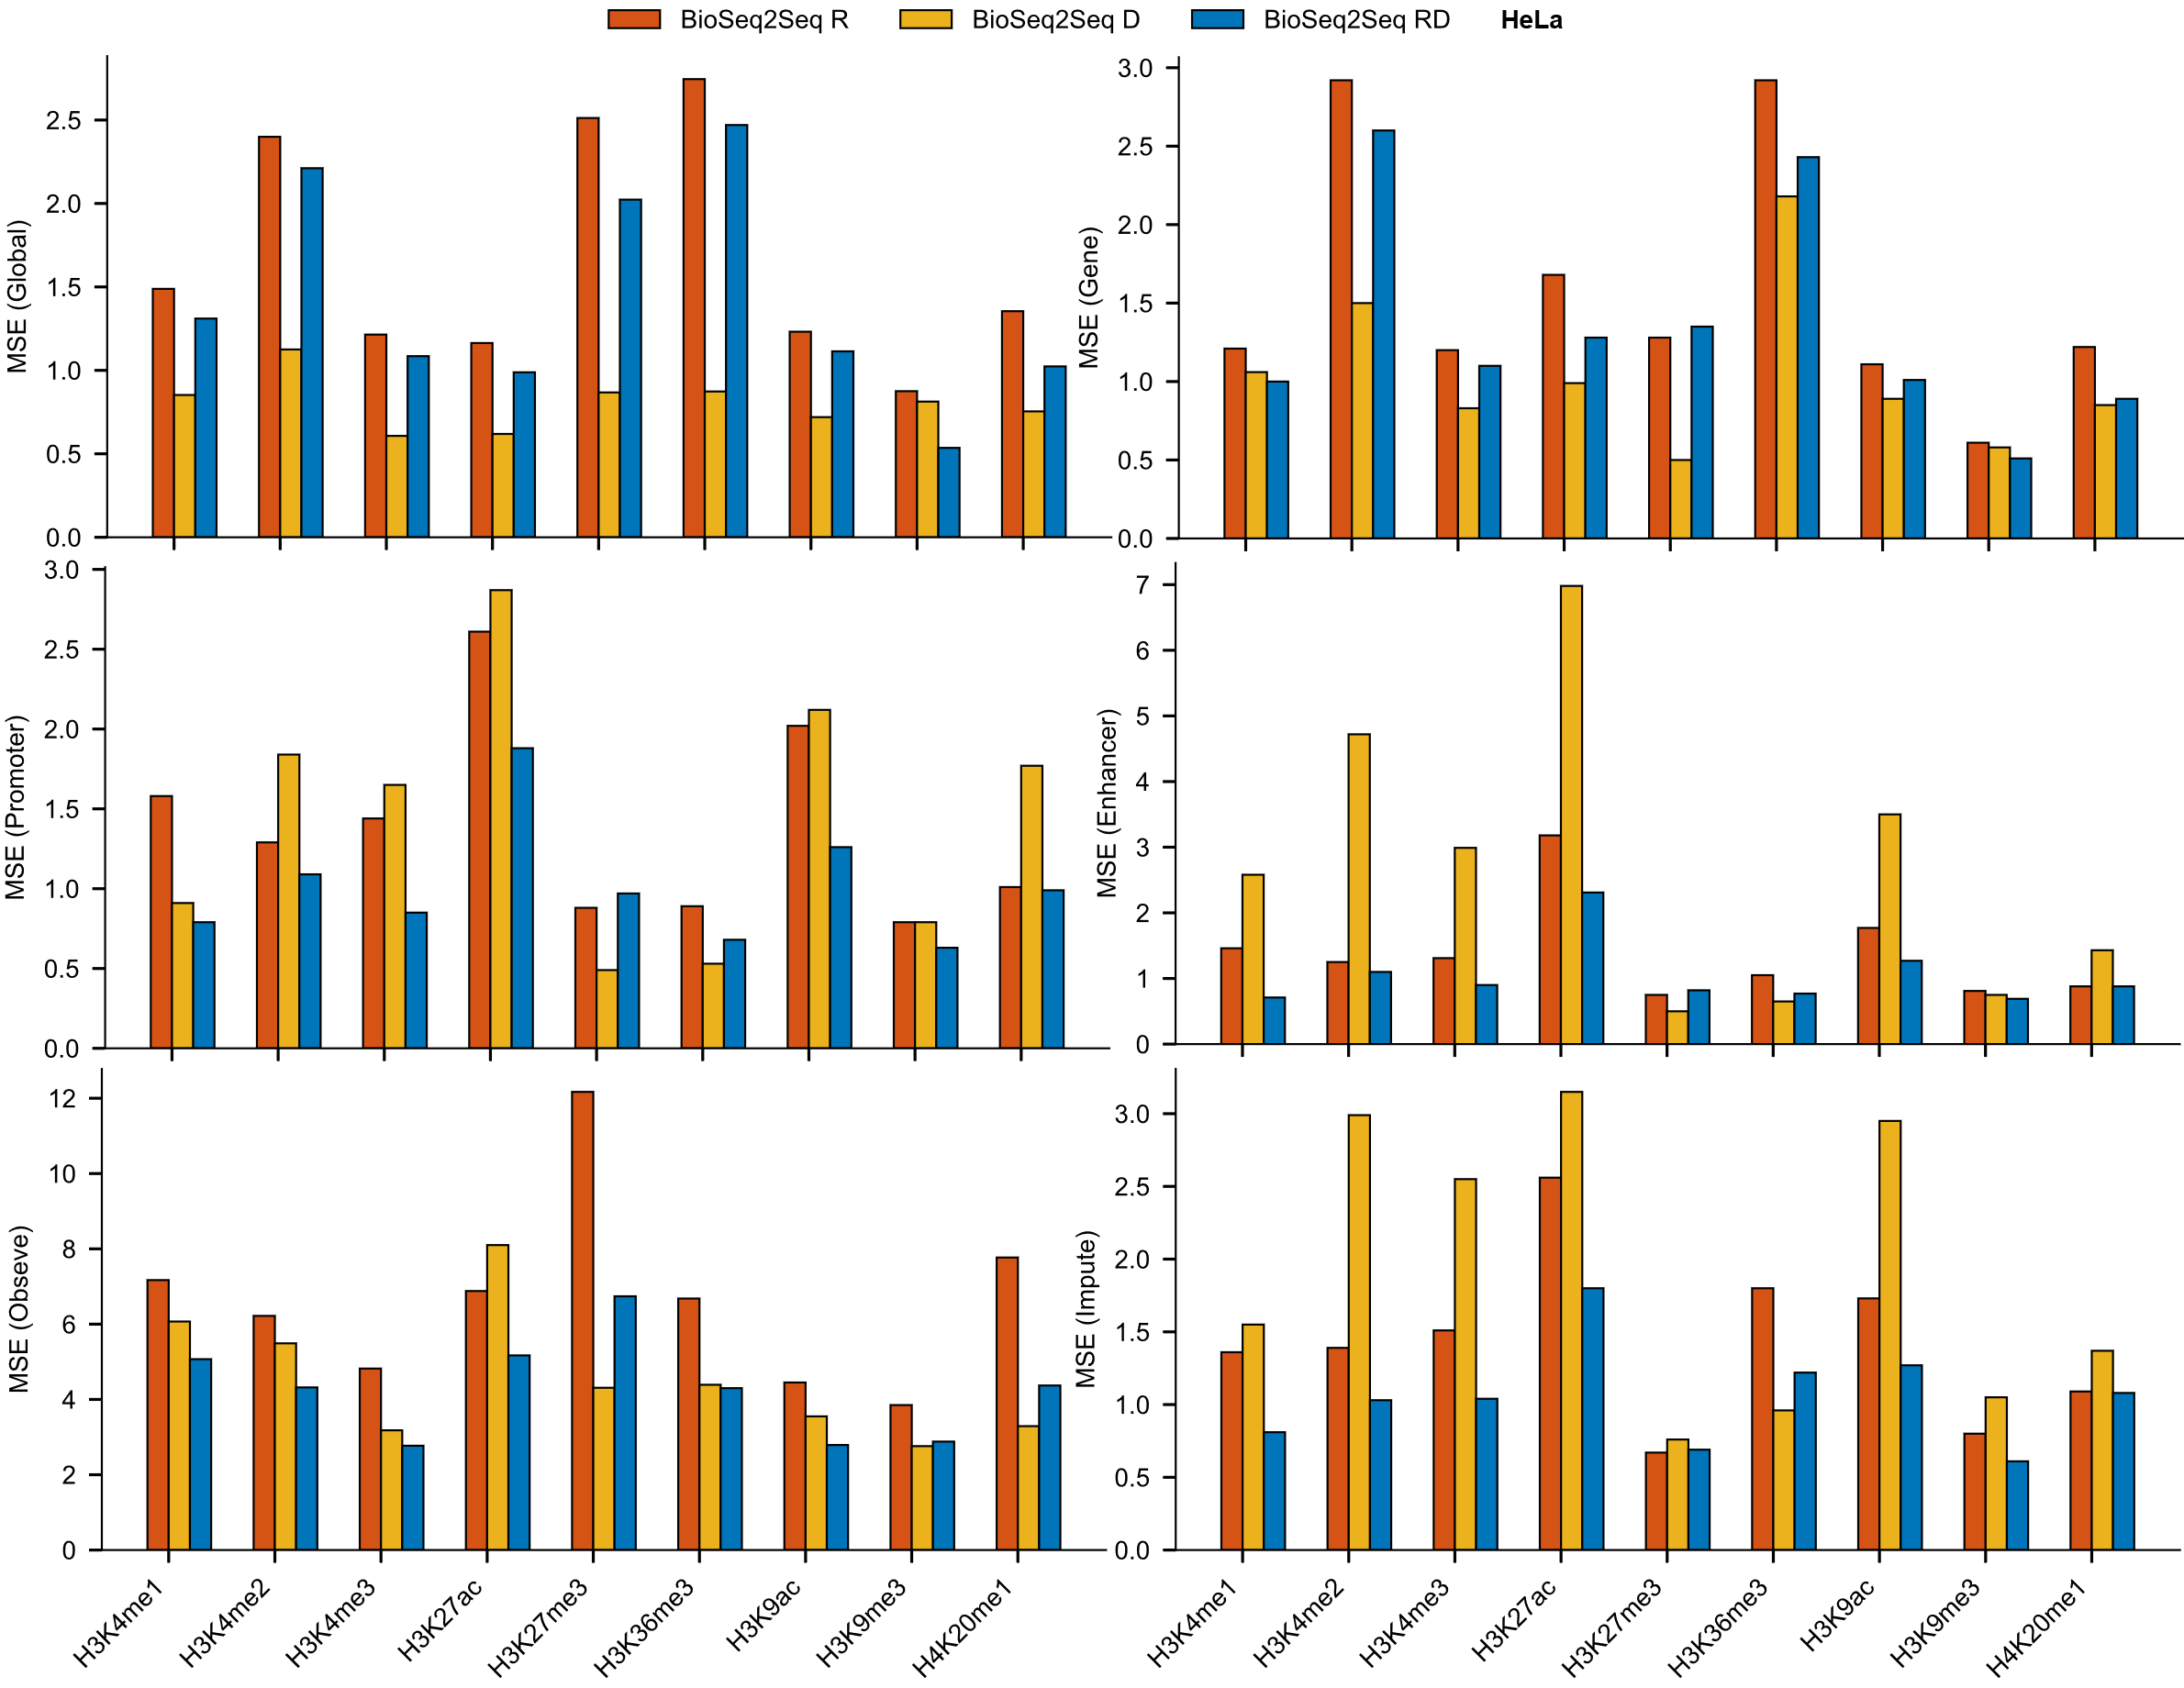


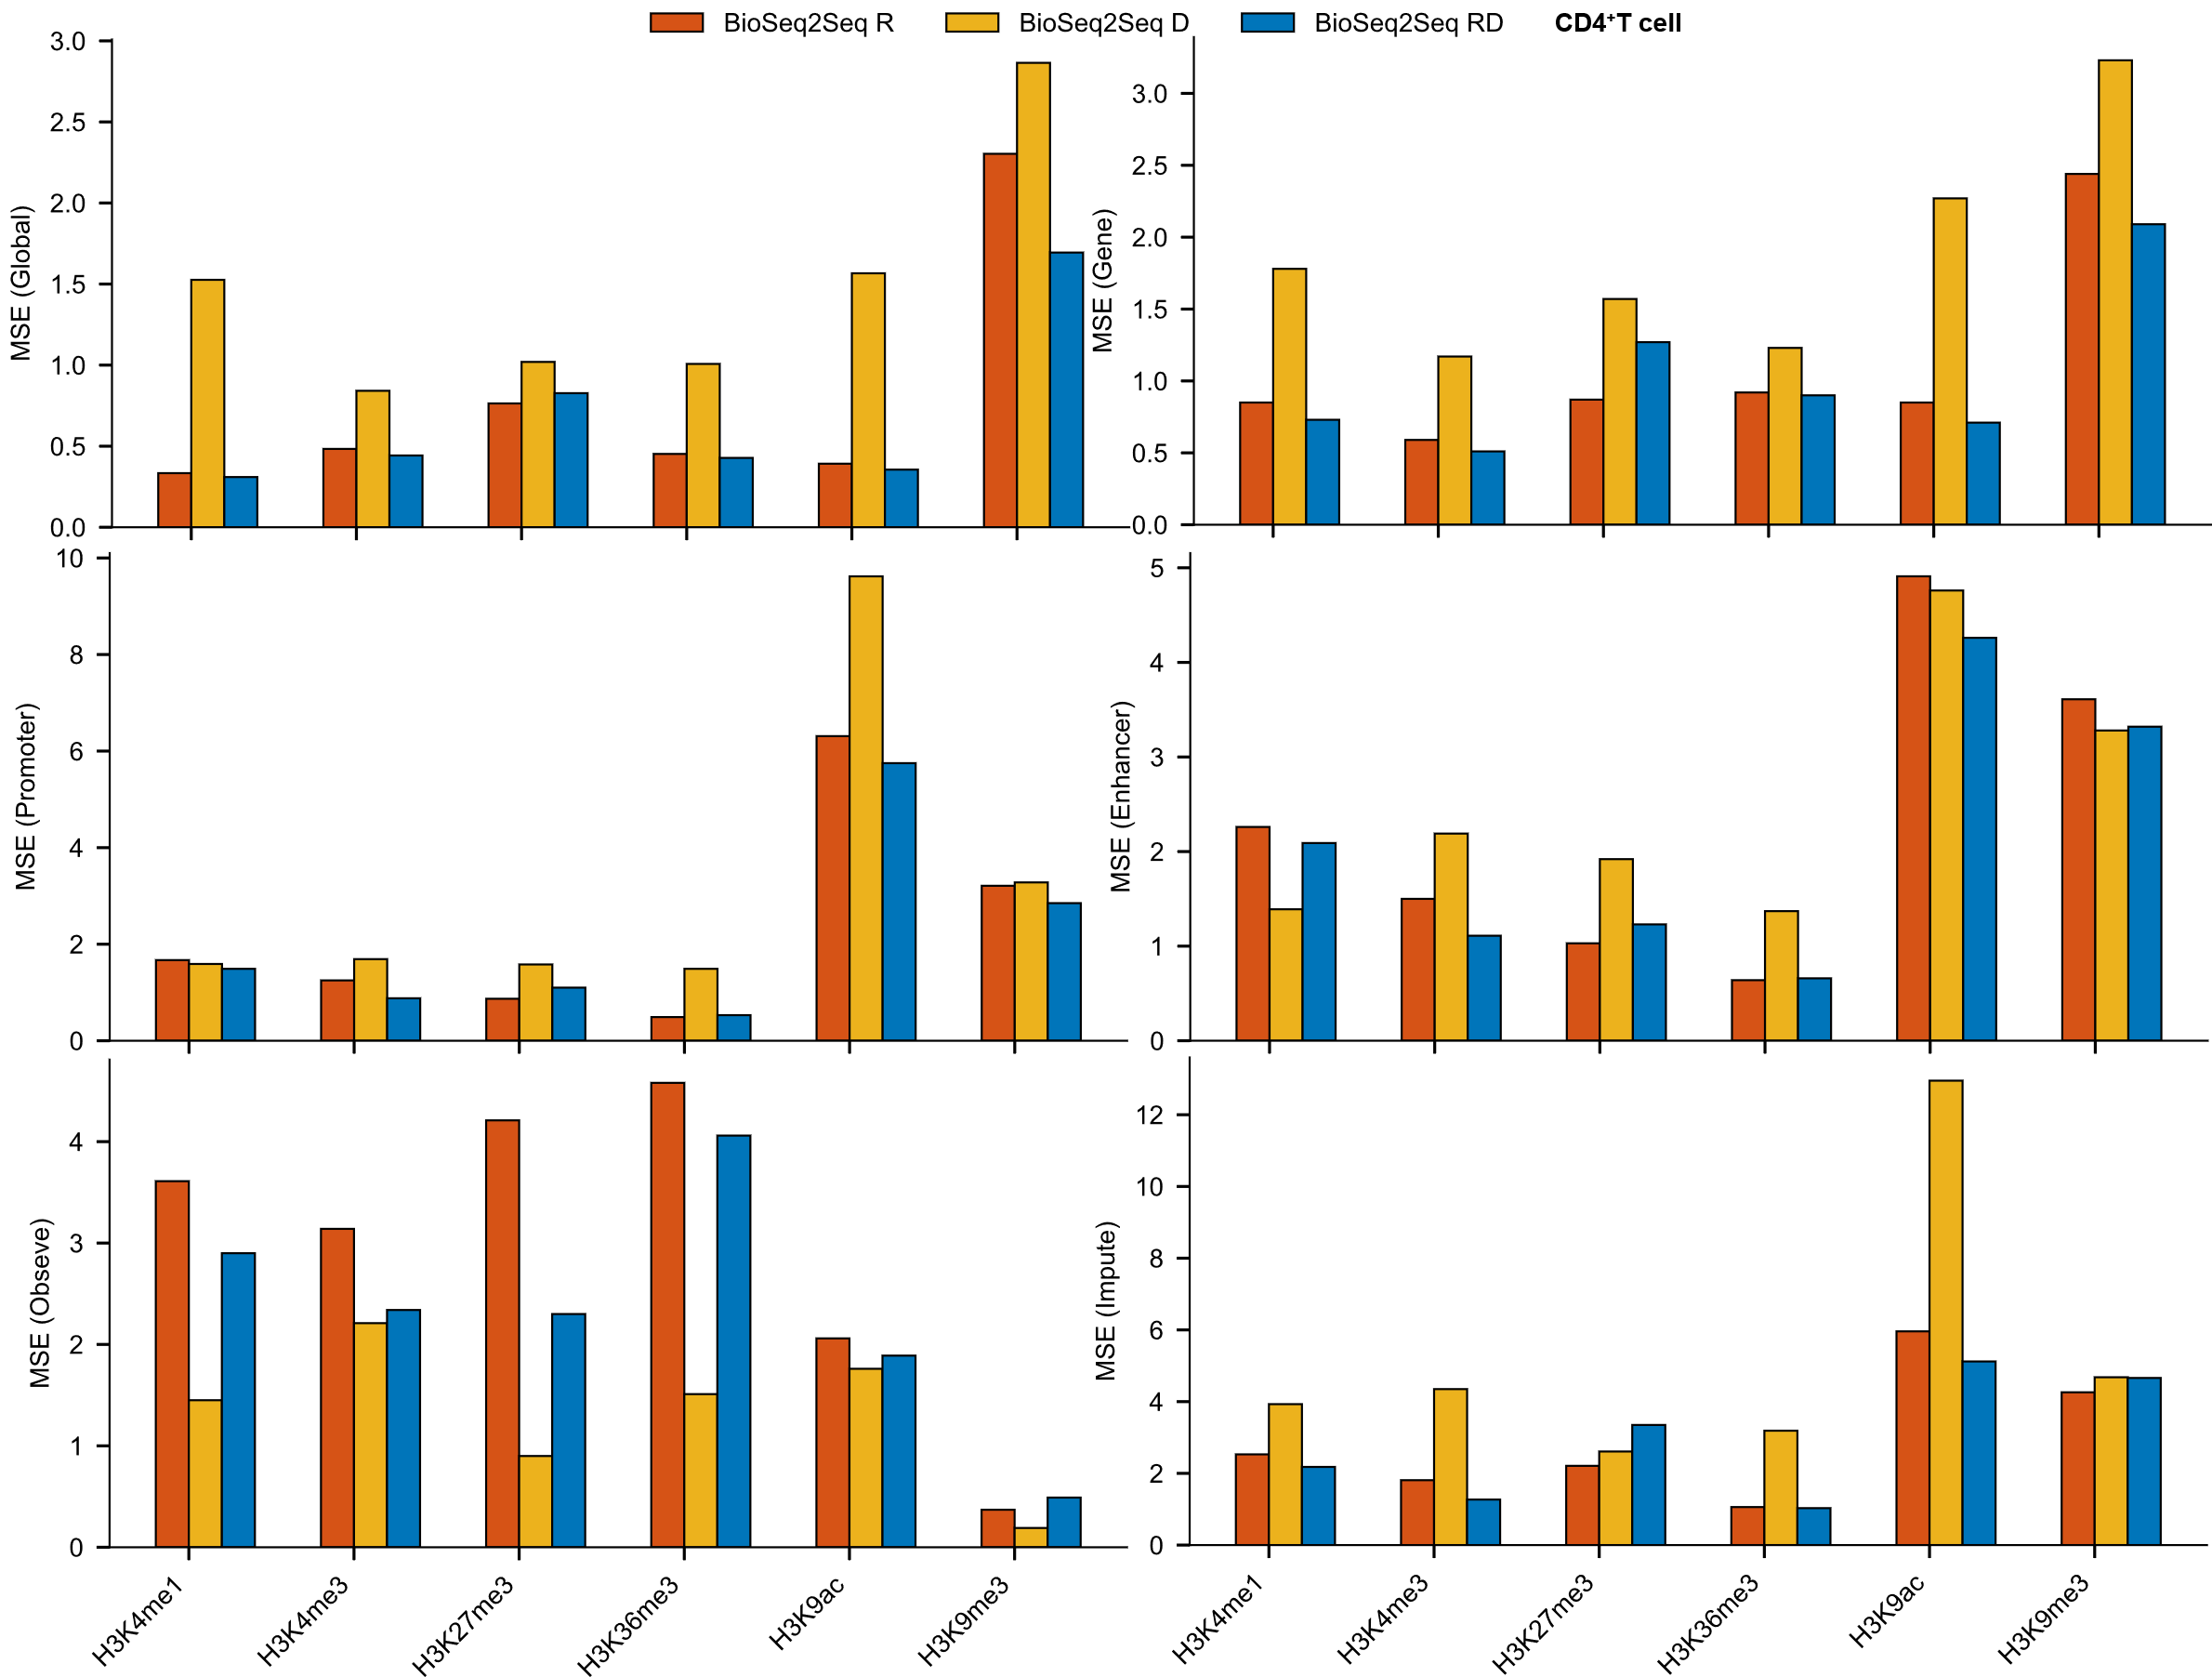


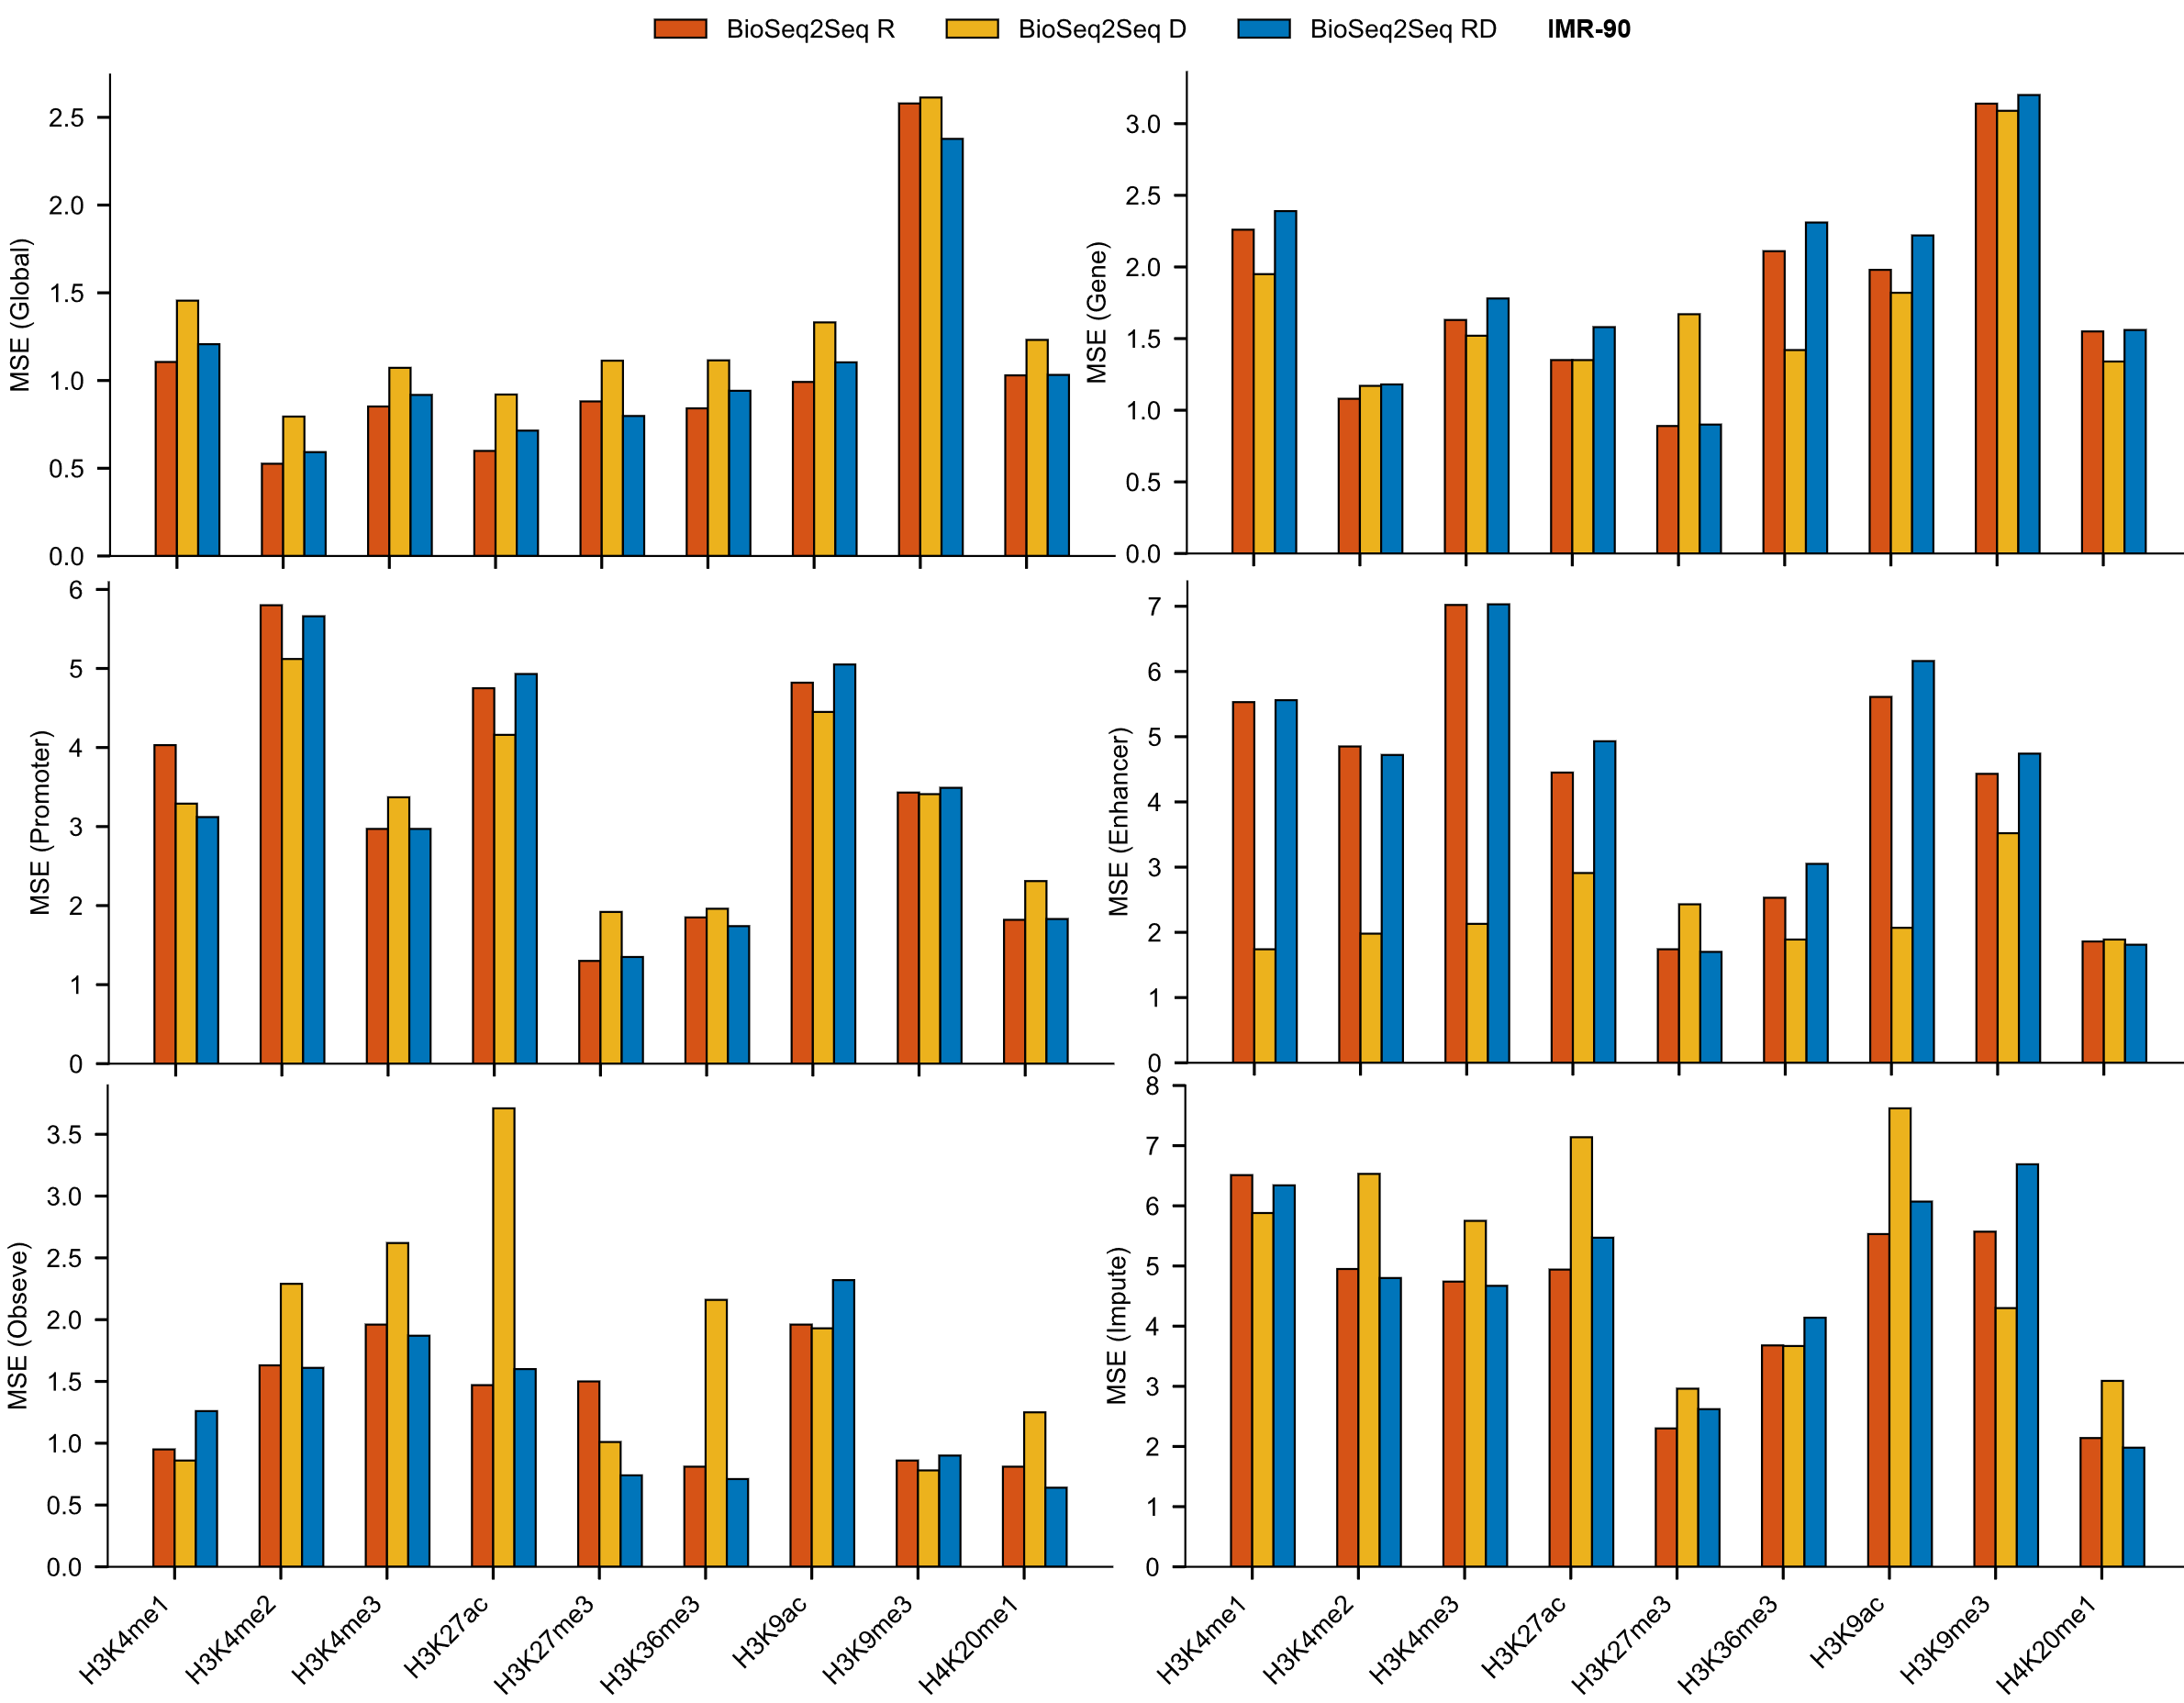


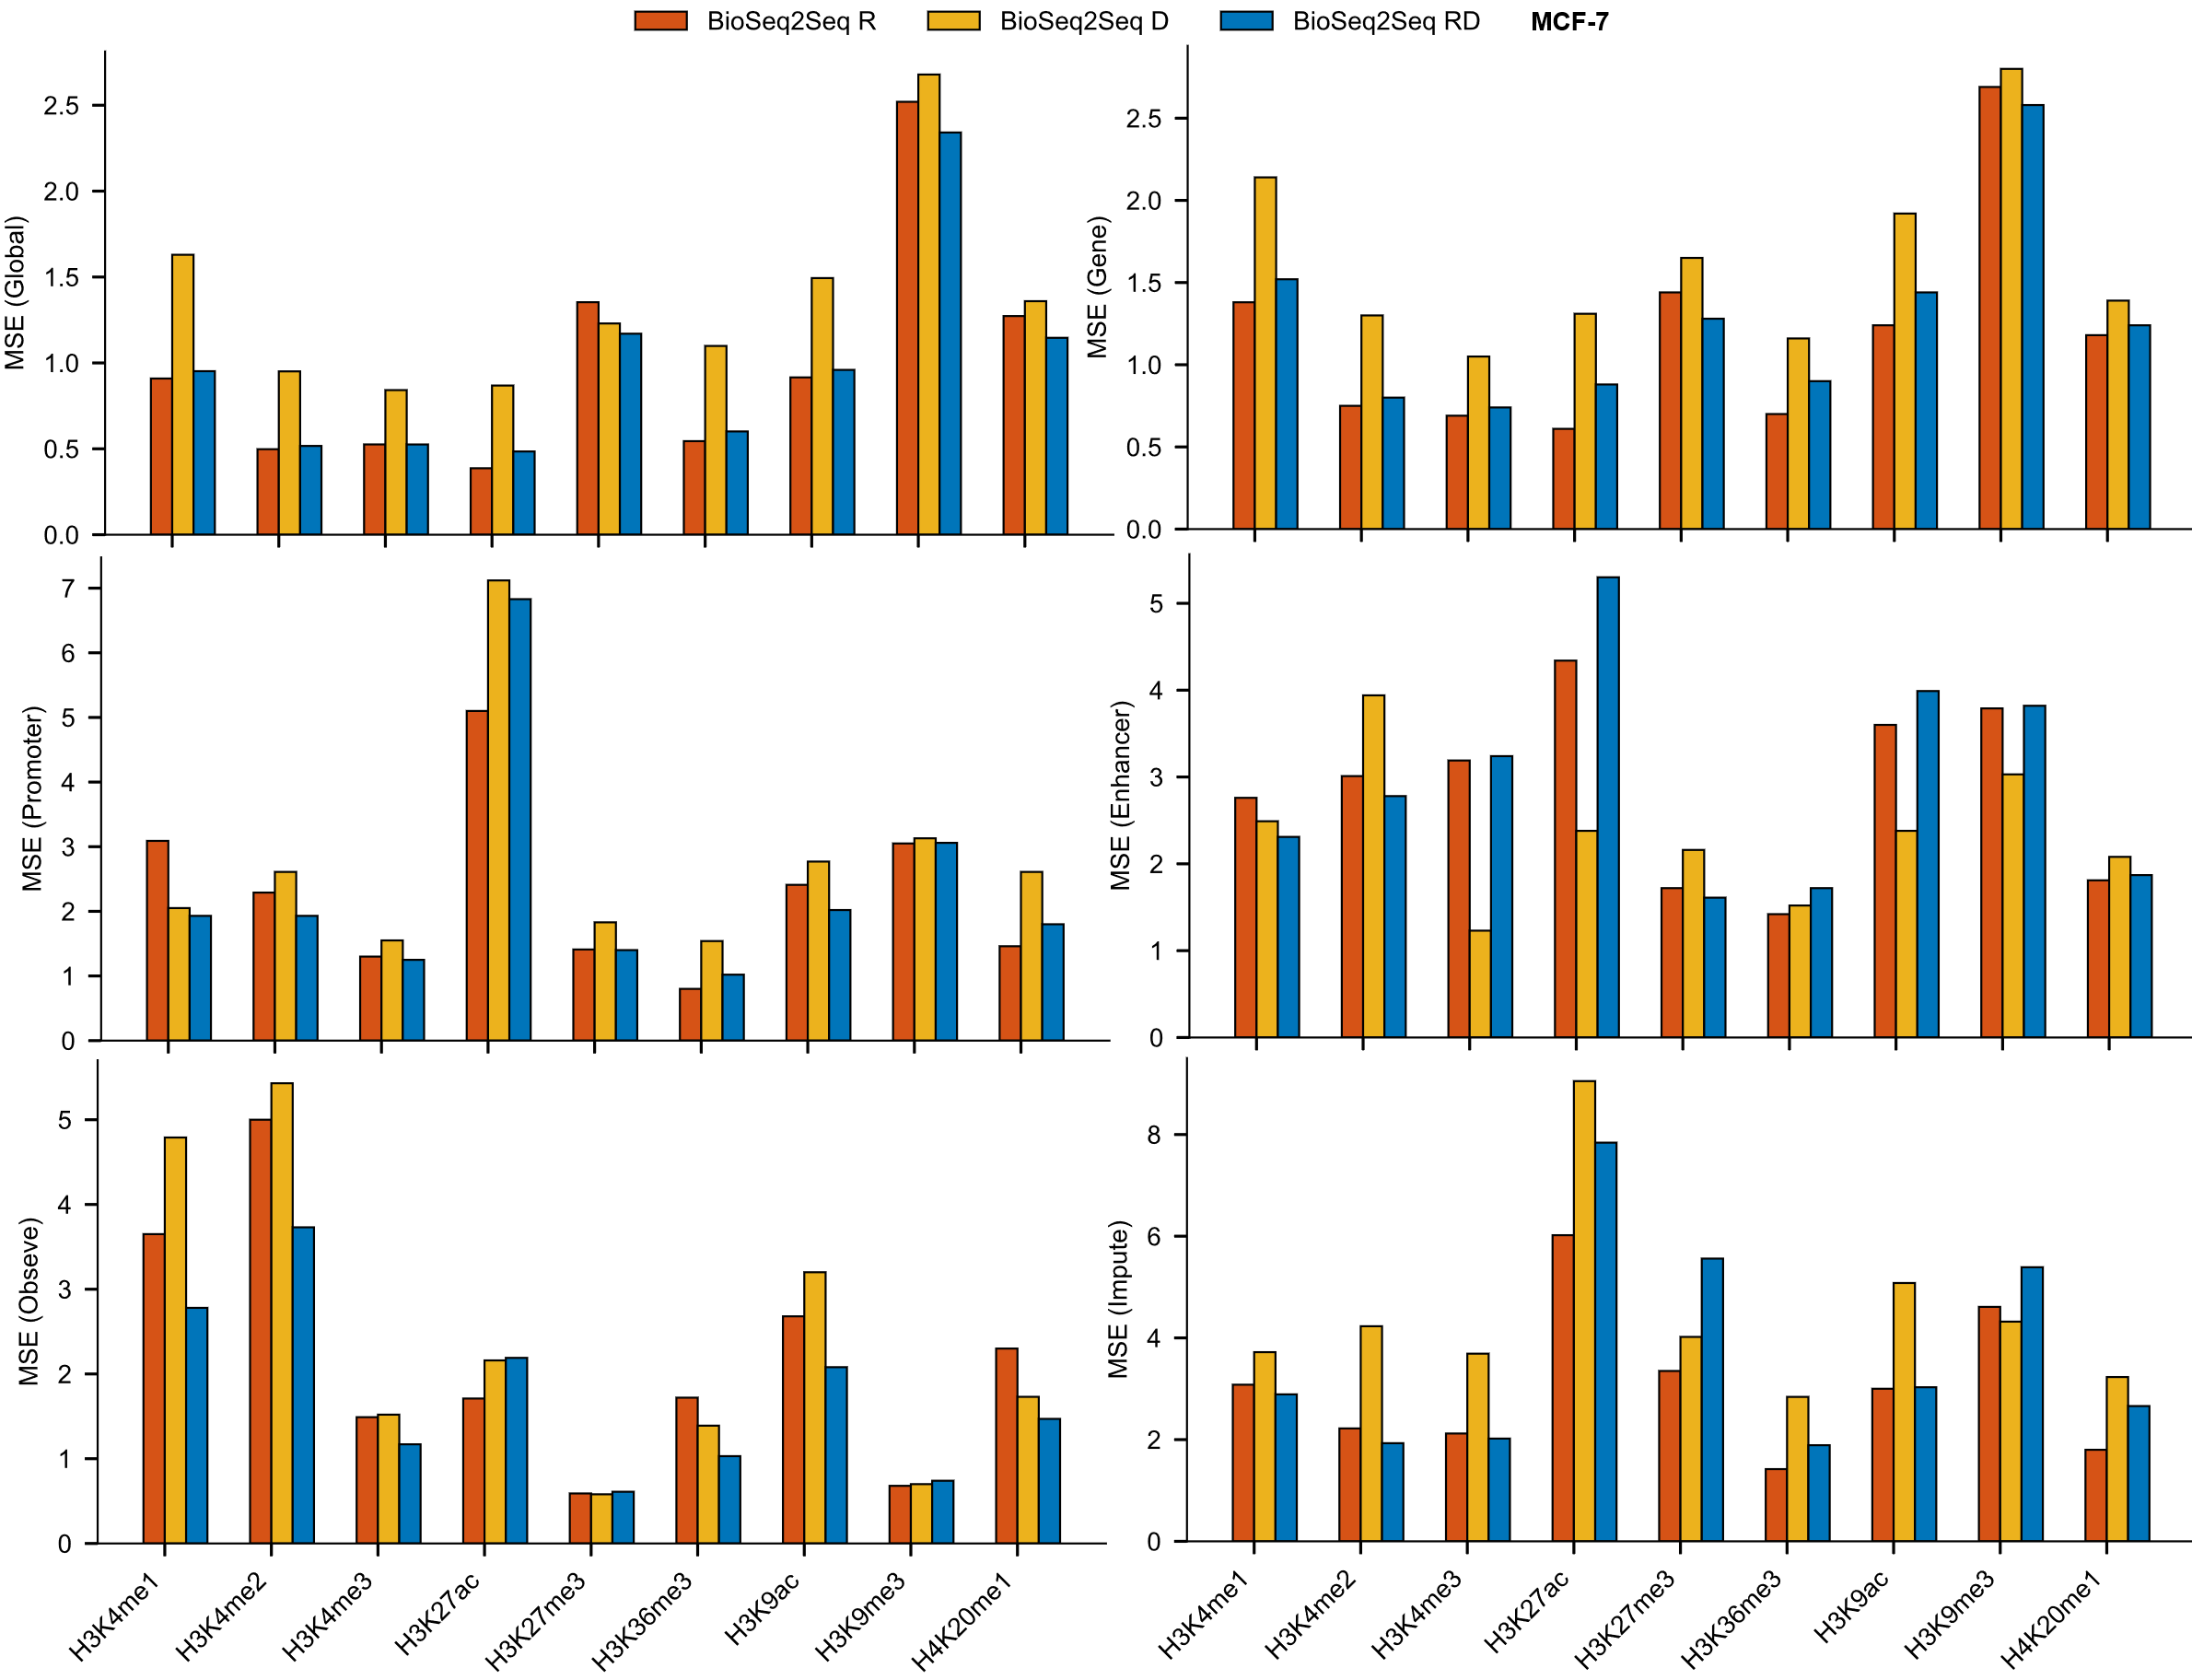


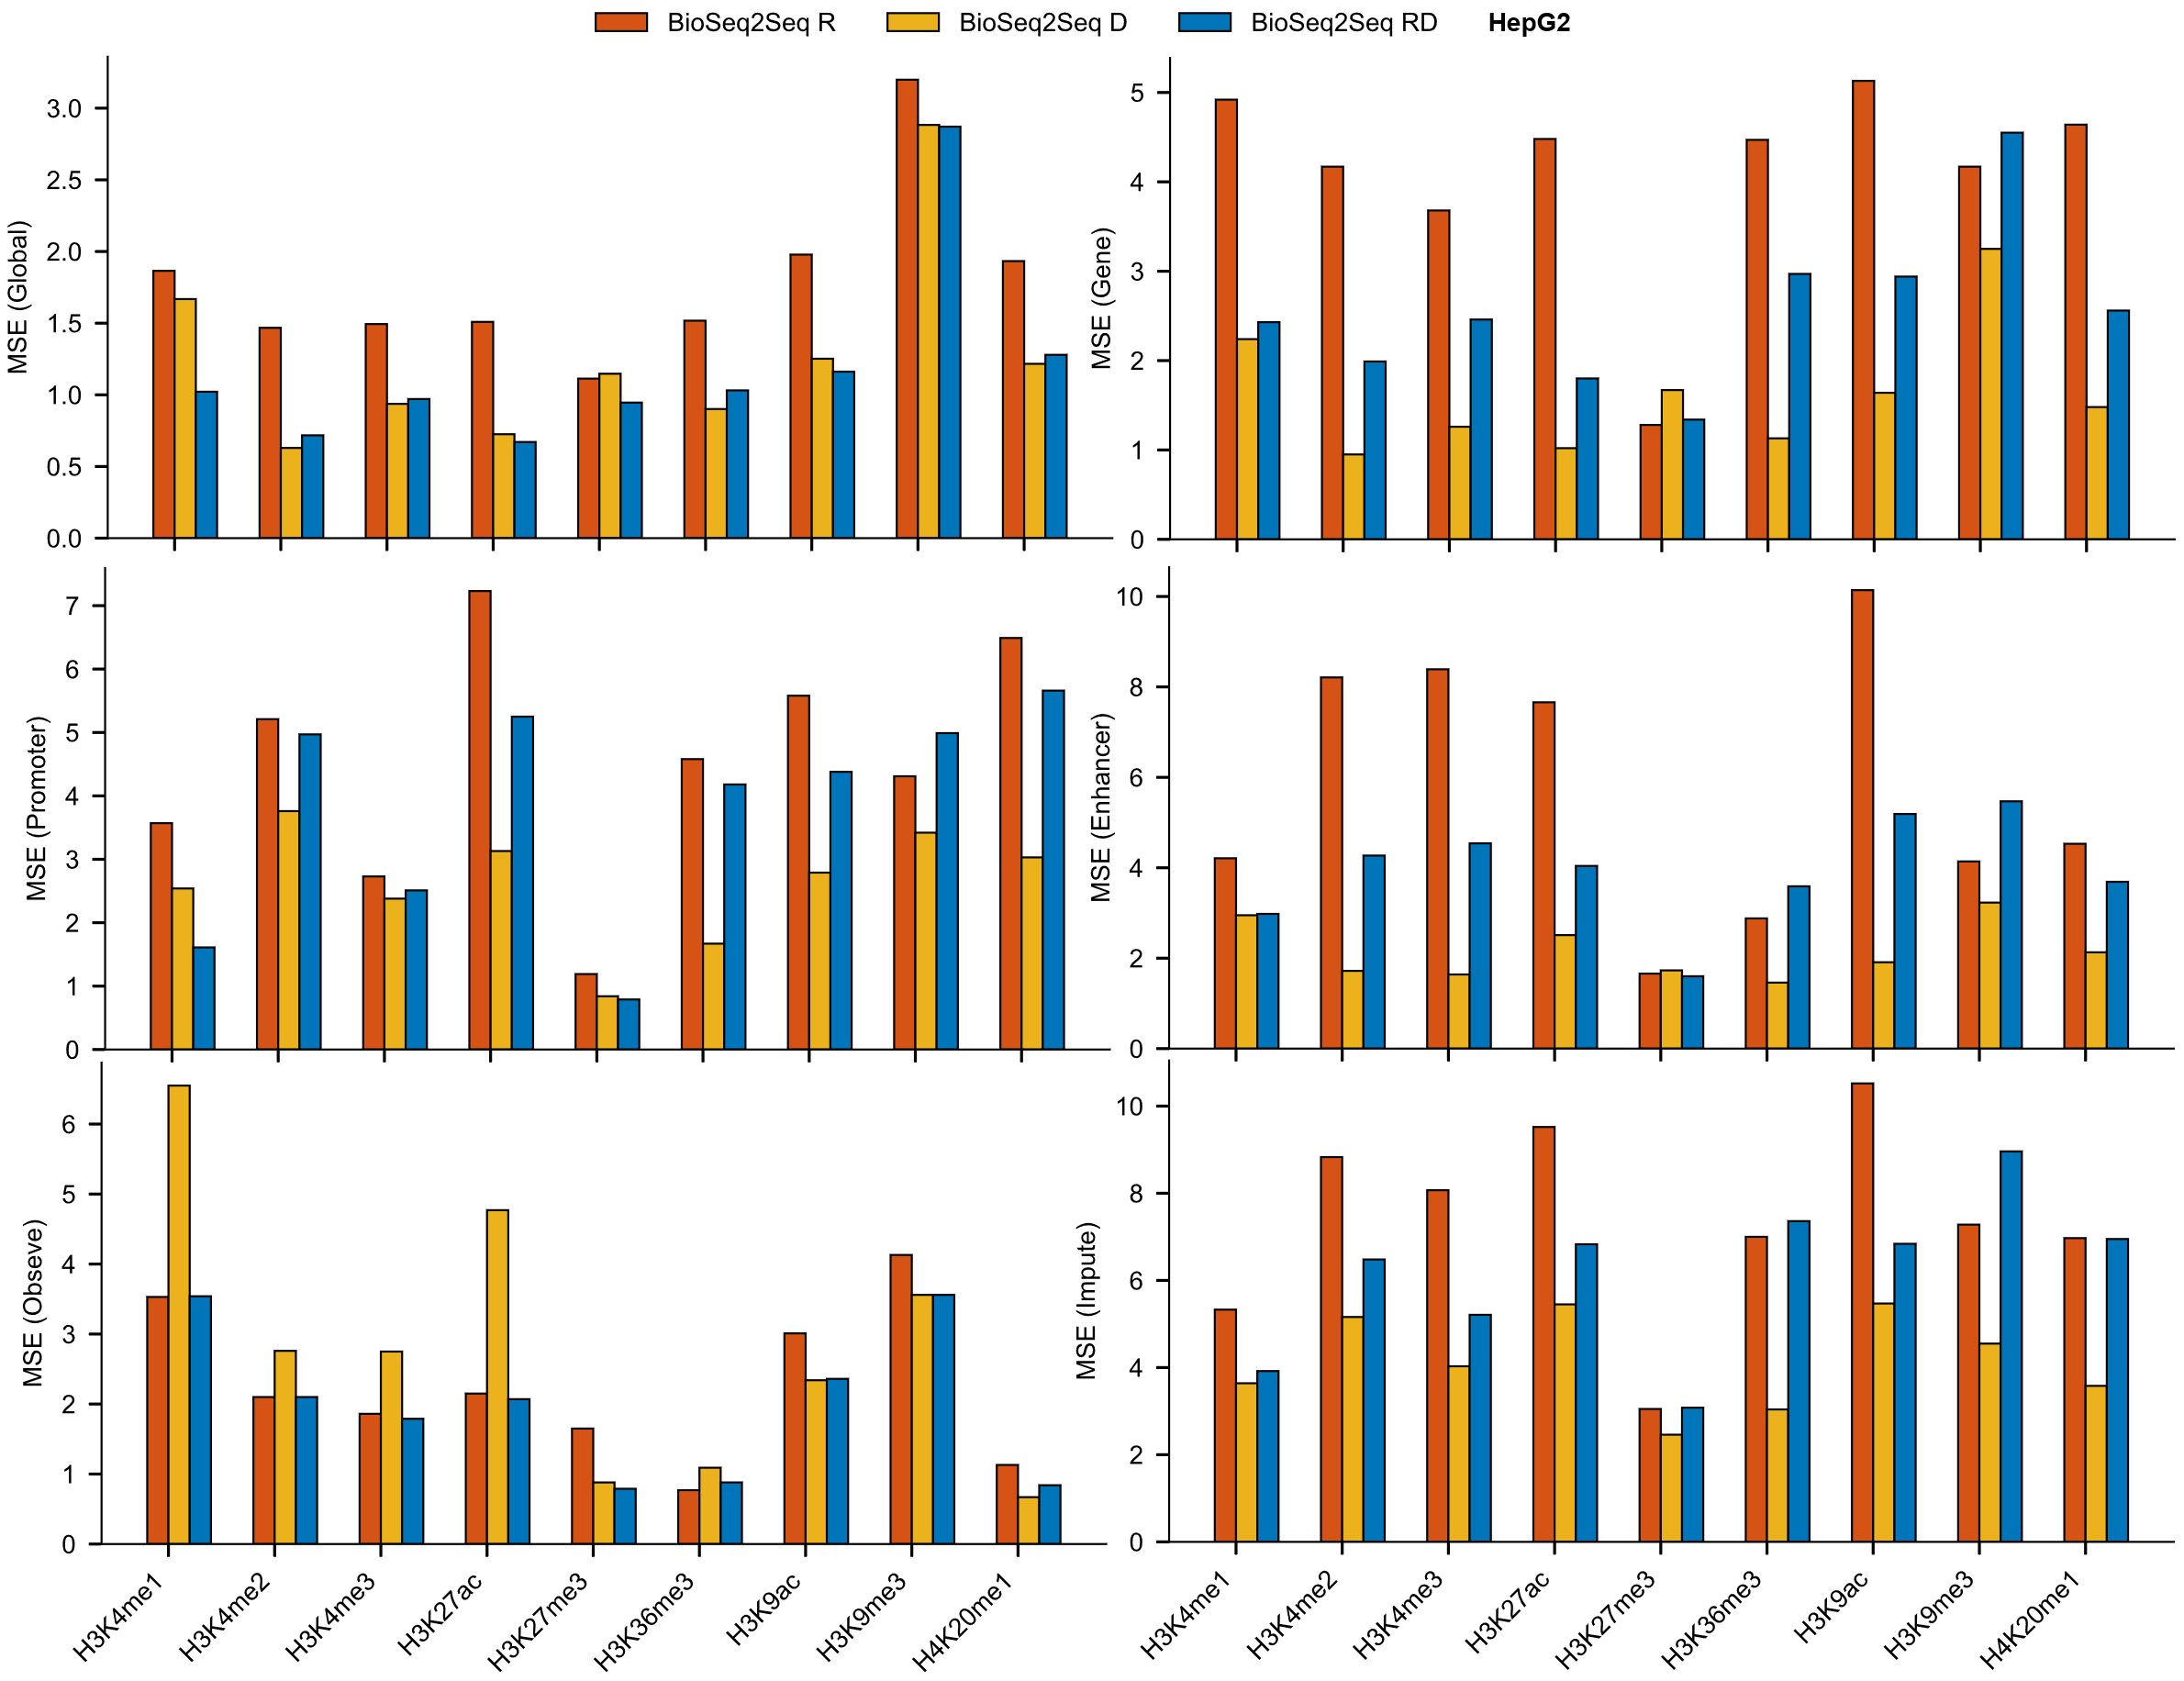


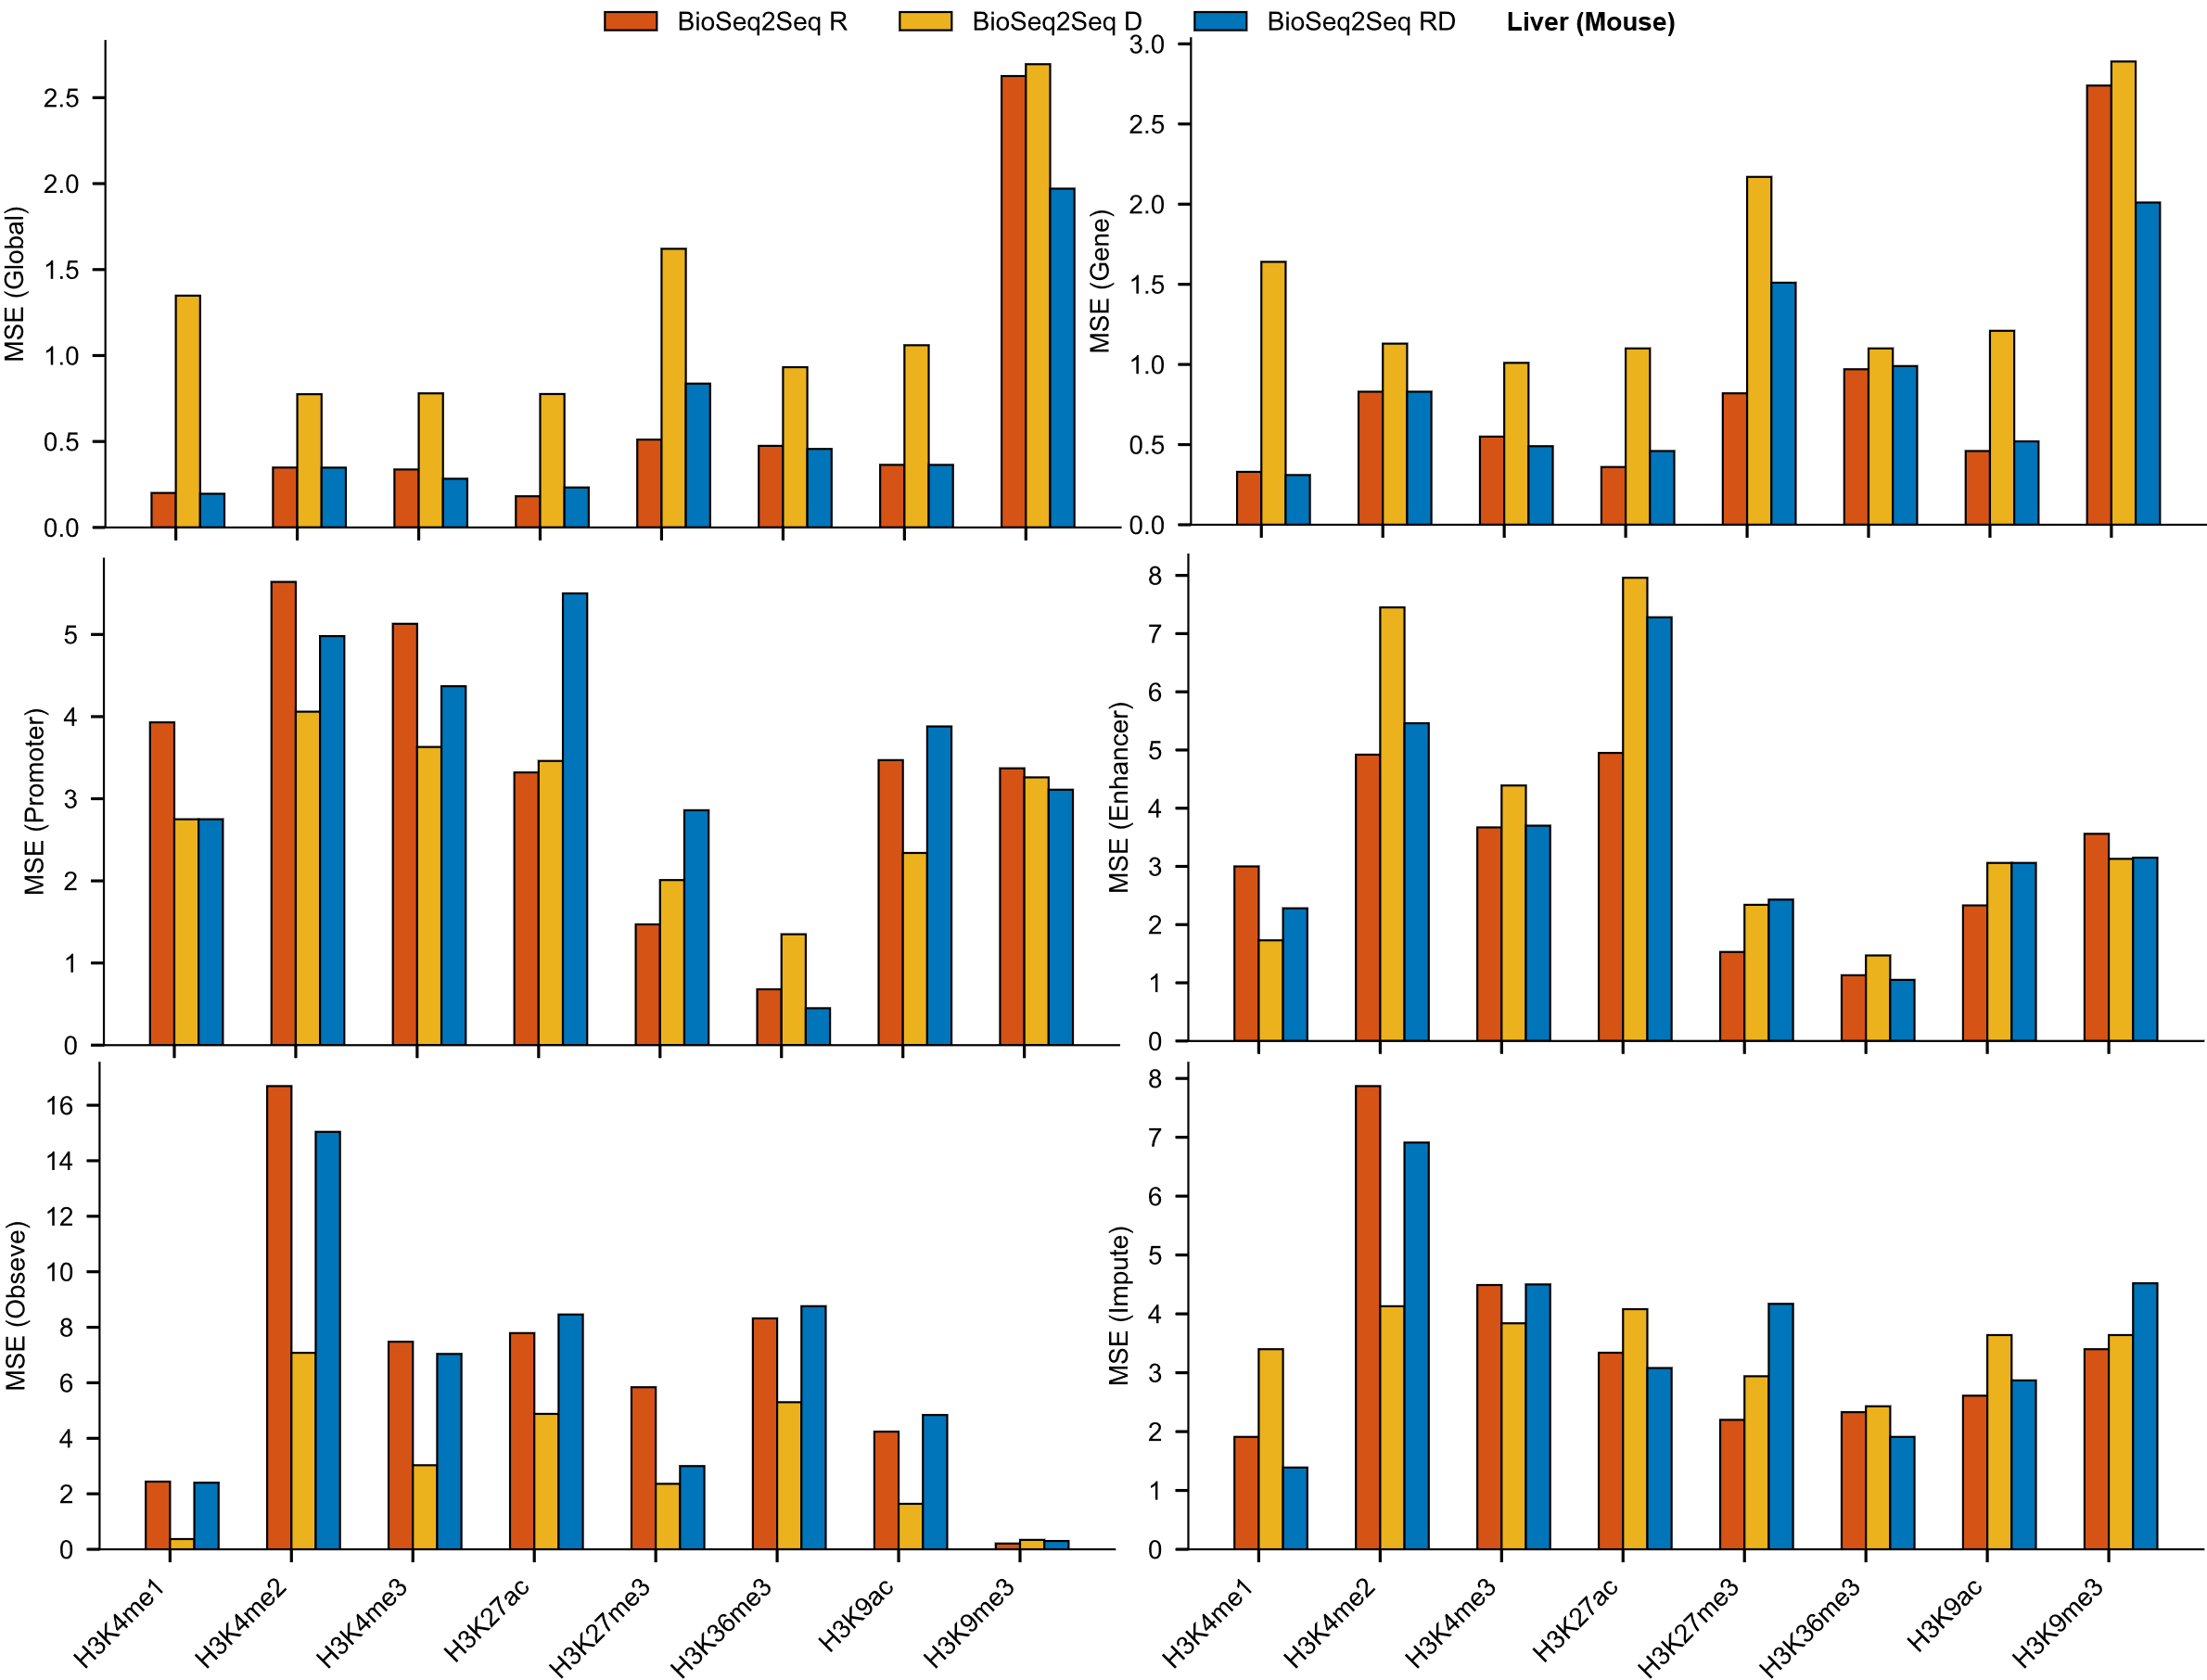


**Supplementary Figure S11: Mean squared error (MSE) across eight cell/tissue types: K562, HCT116, HeLa, CD4⁺ T cells, IMR-90, MCF-7, HepG2, and mouse liver.**

**
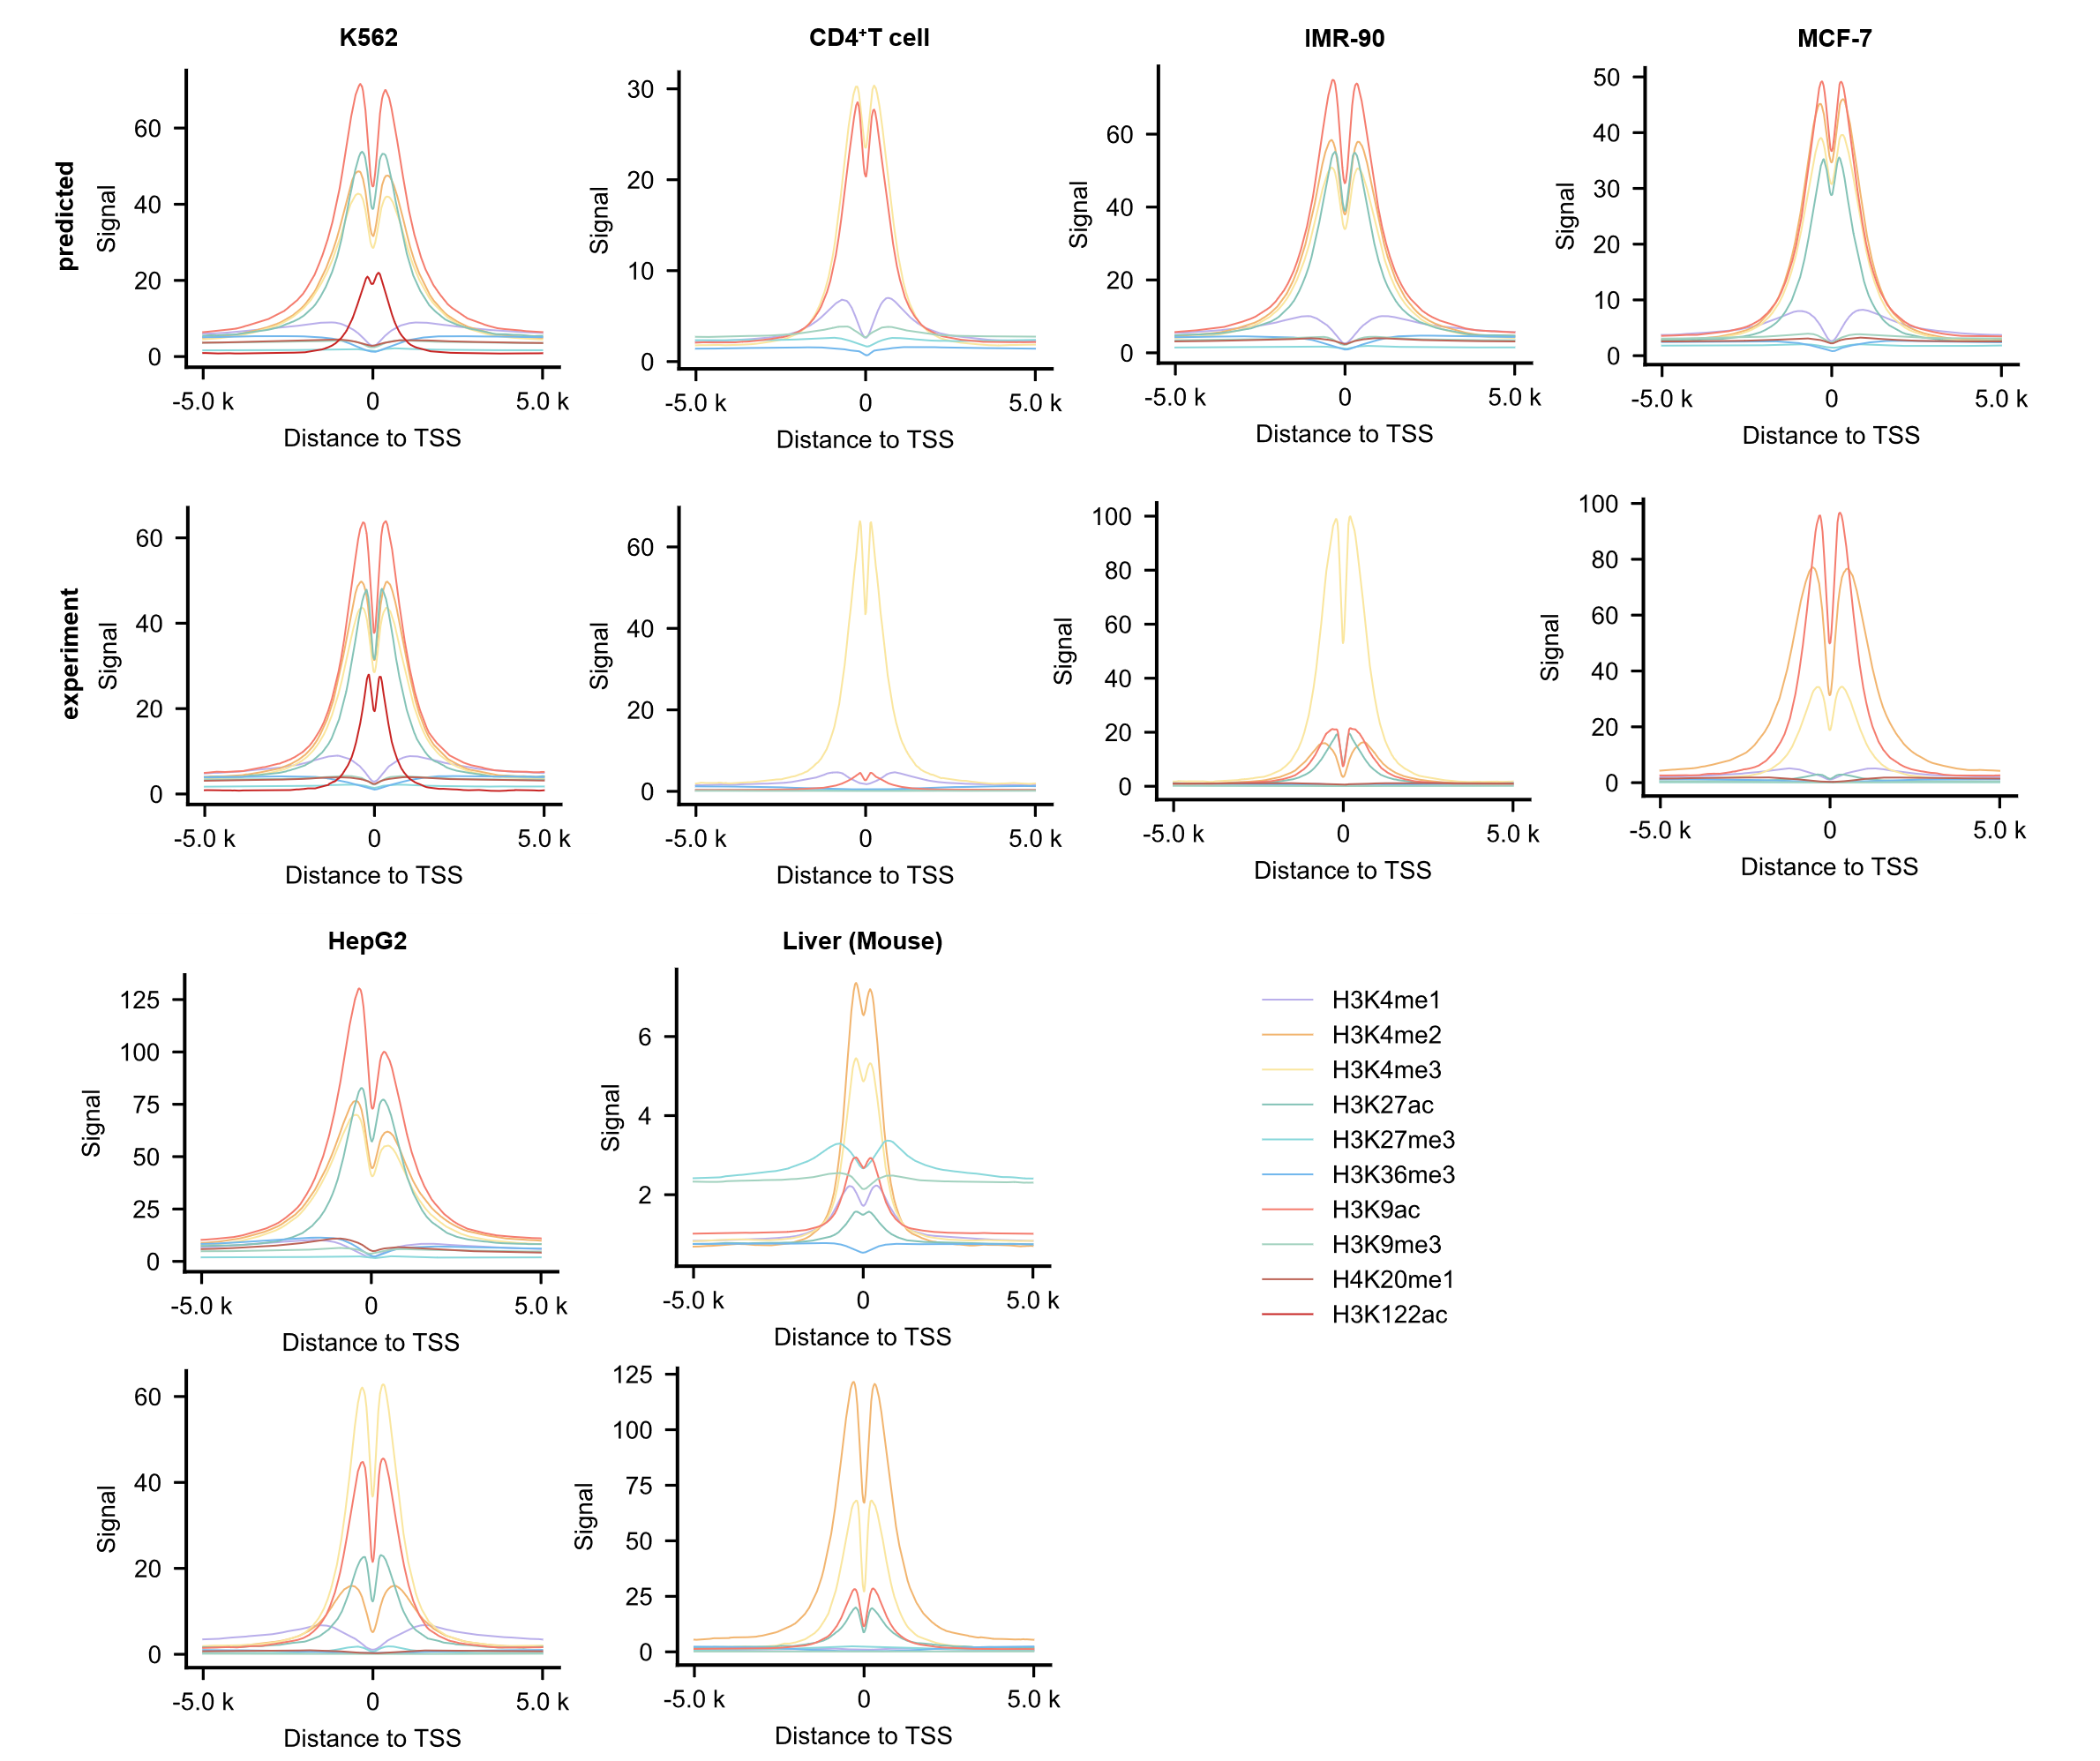
**

**Supplementary Figure S12: Enrichment of histone modification signals within ±5 kb of the TSS.**

**
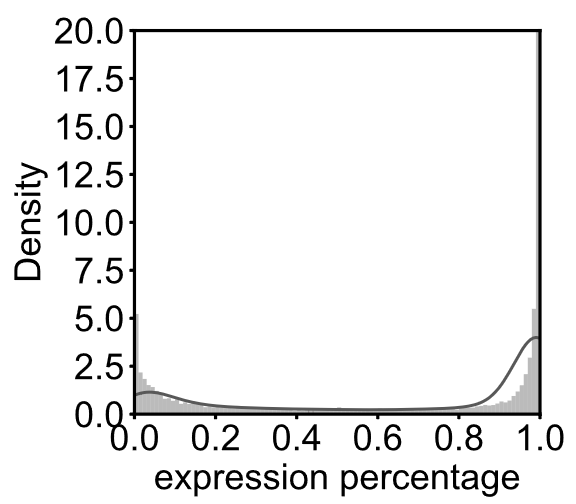
**

**Supplementary Figure S13: Statistical analysis of gene expression levels quantified based on RO-seq.**

**
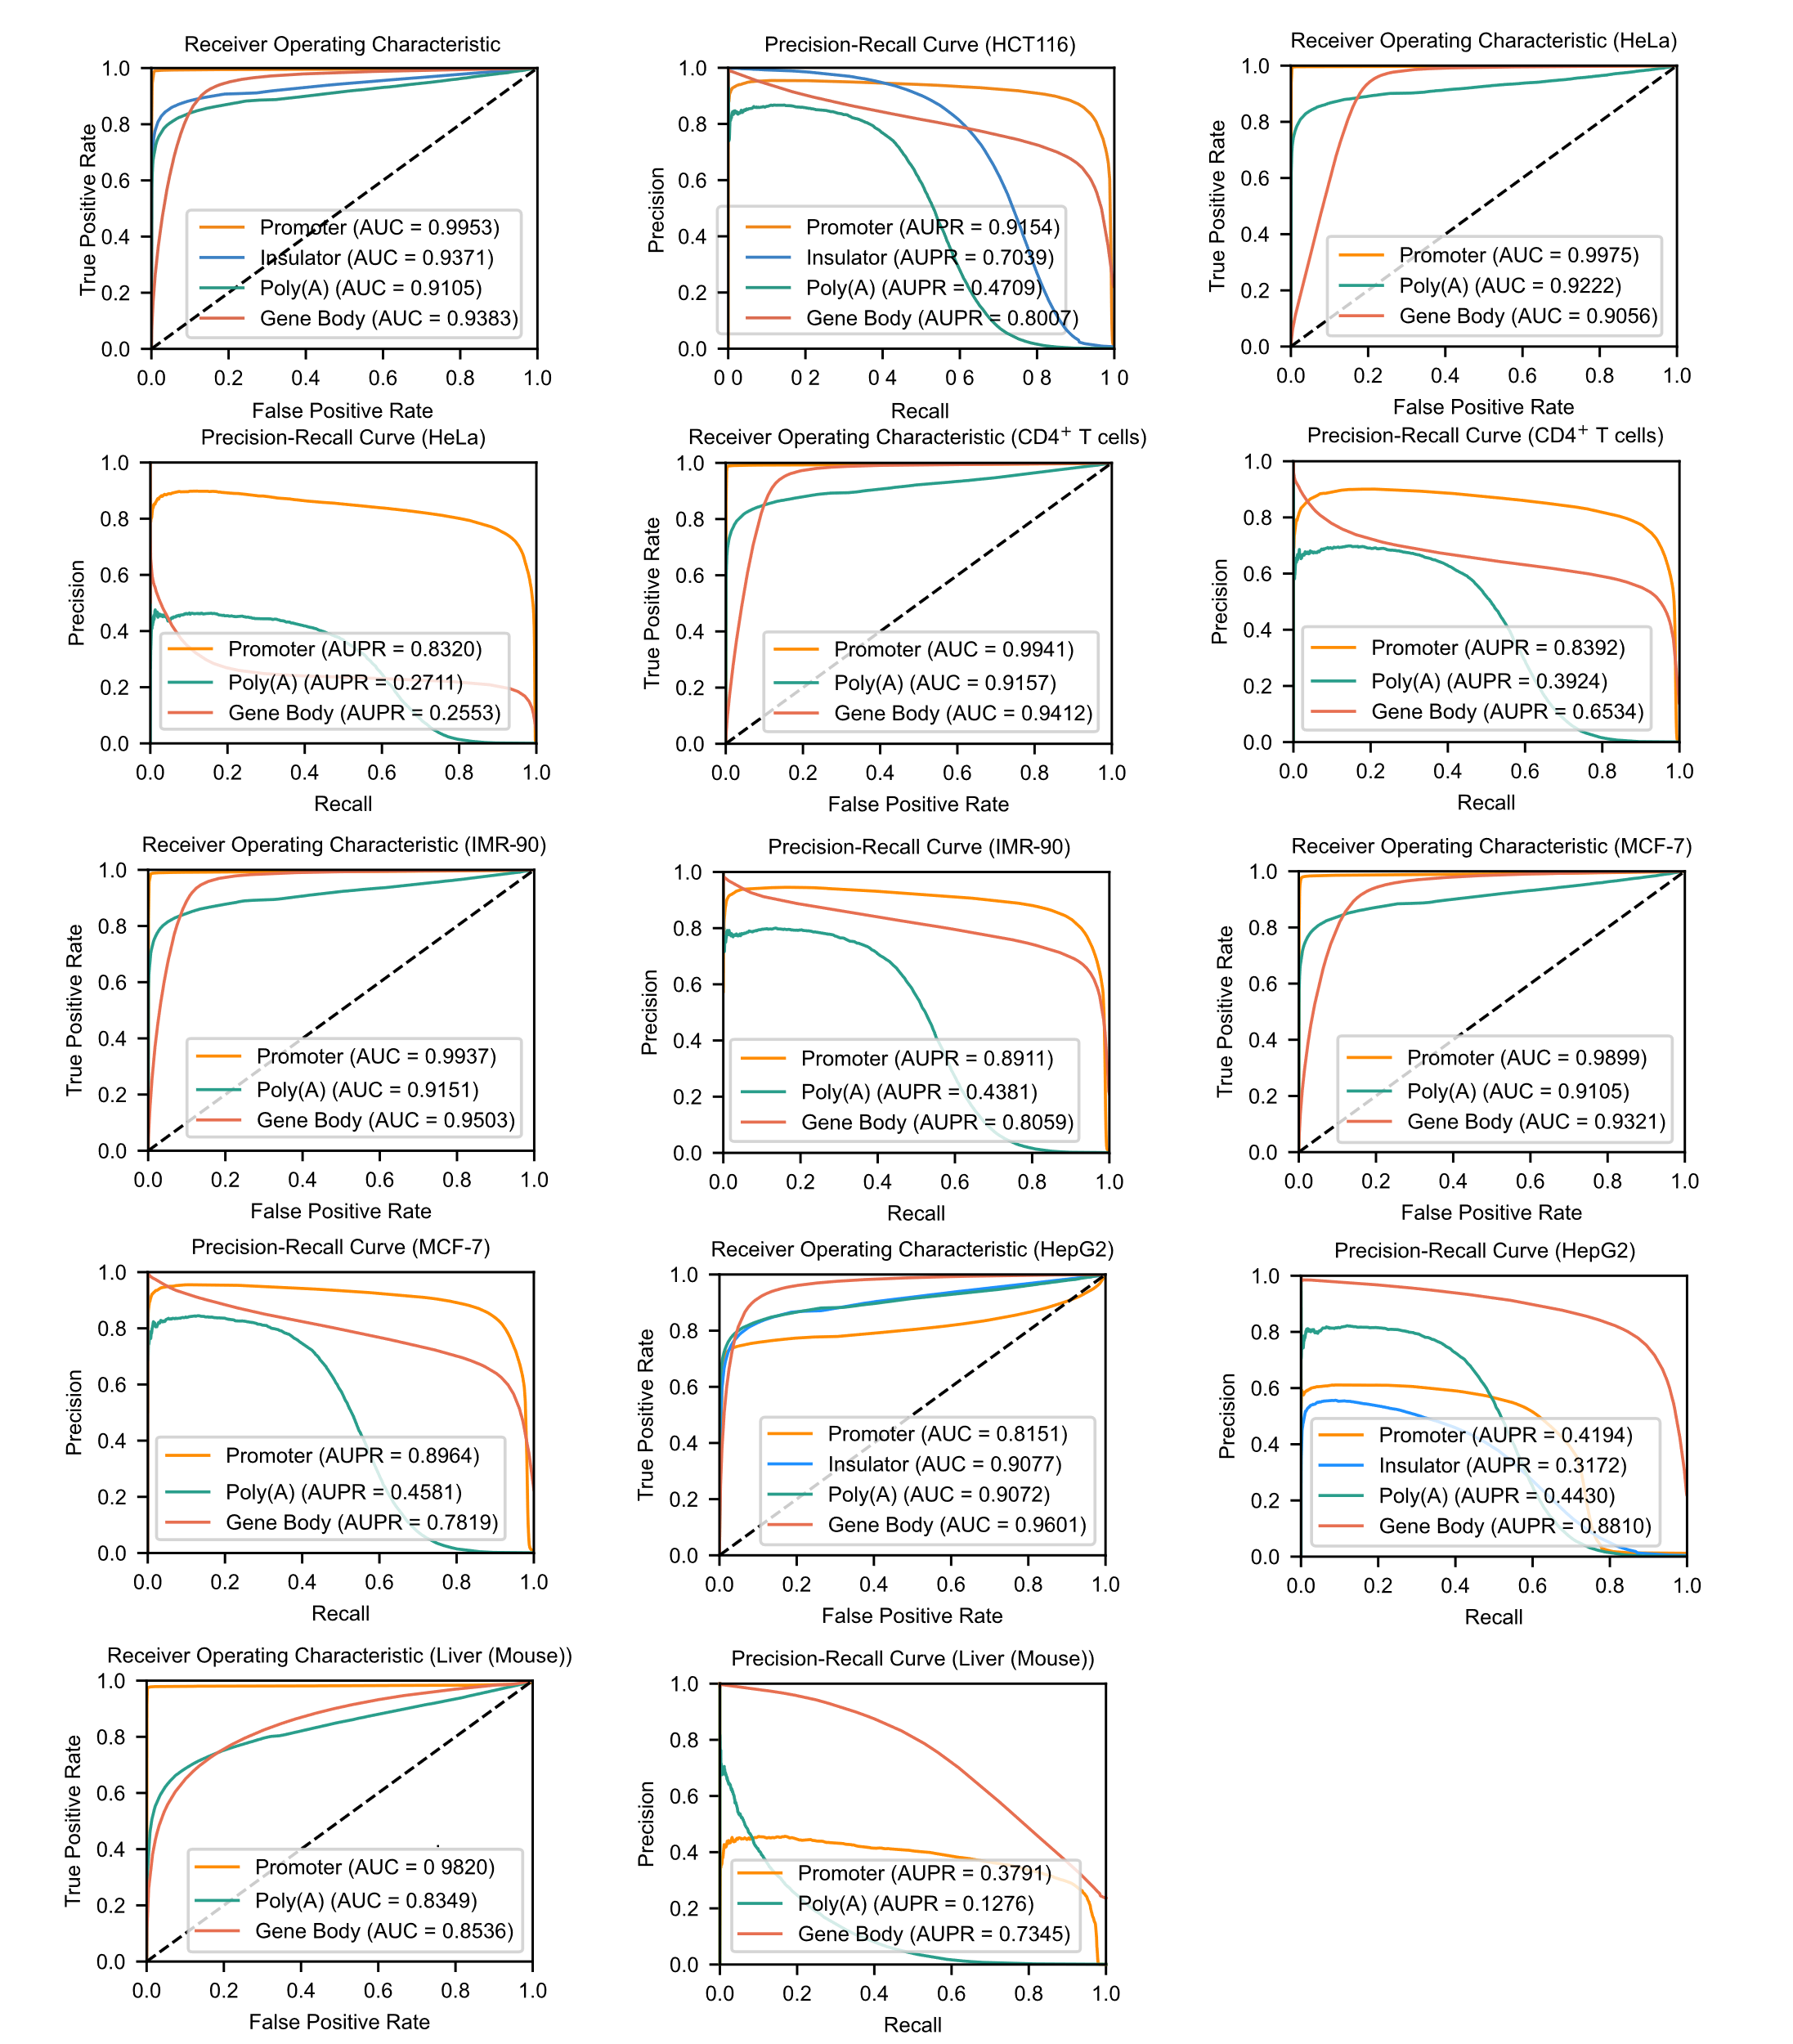
**

**Supplementary Figure S14: AUC and AUPR scores of BioSeq2Seq for functional element prediction.**

**
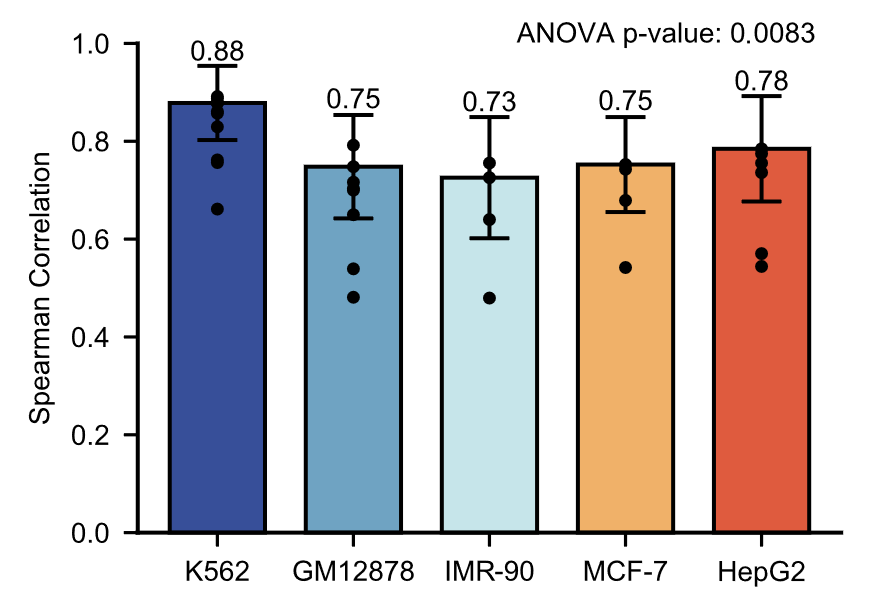
**

**Supplementary** **Figure S13. Spearman correlation between BioSeq2Seq predictions and RNA-seq data across various cell types.**

**
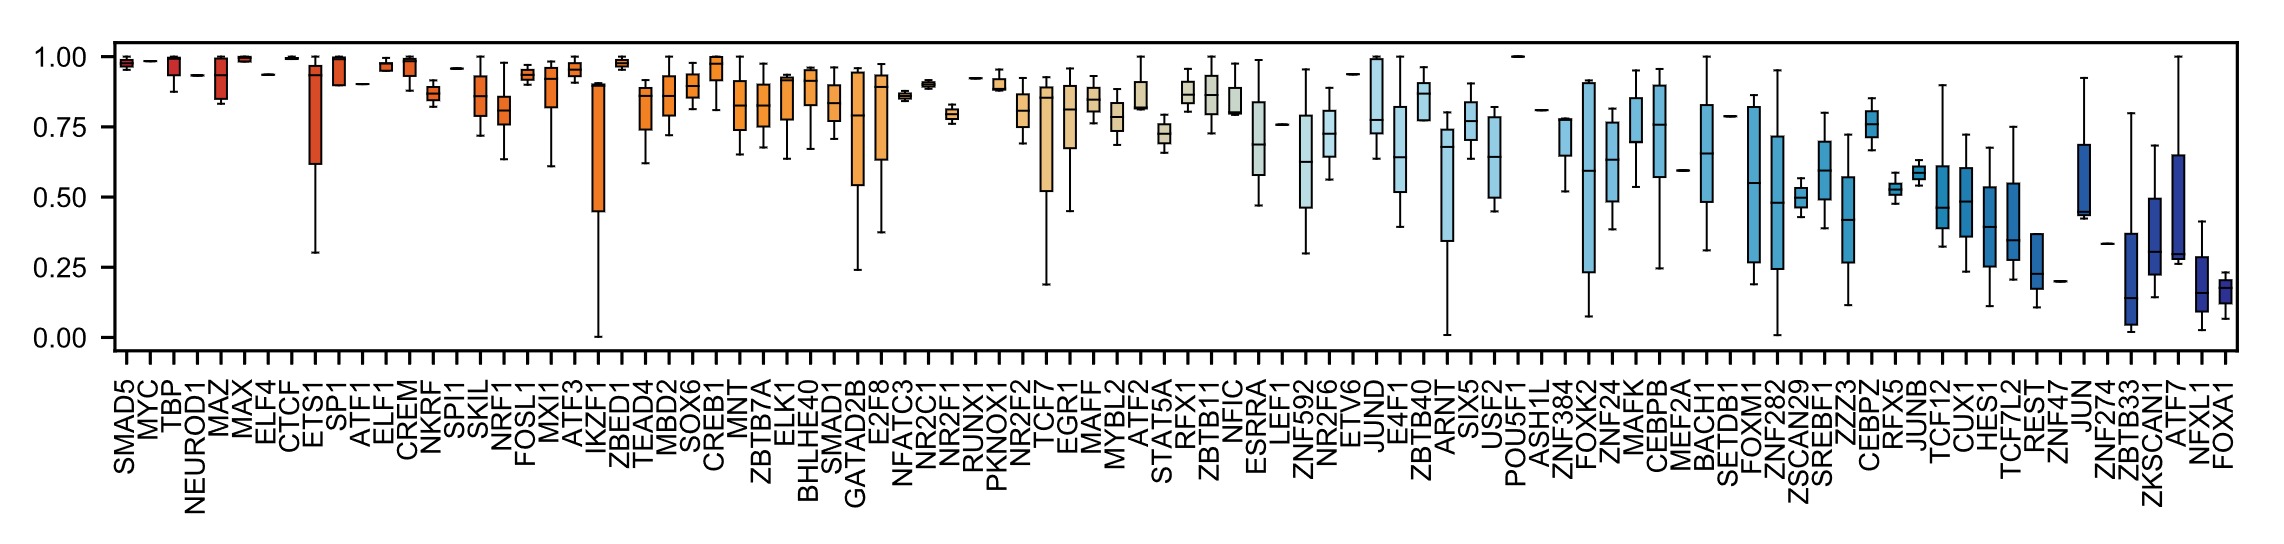
**

**Supplementary Figure S14. Precision at 5% recall for 90 transcriptional regulatory factor binding sites (TFBSs) predicted by BioSeq2Seq. Each box represents the prediction results for the same transcription factor across multiple cell lines.**

**
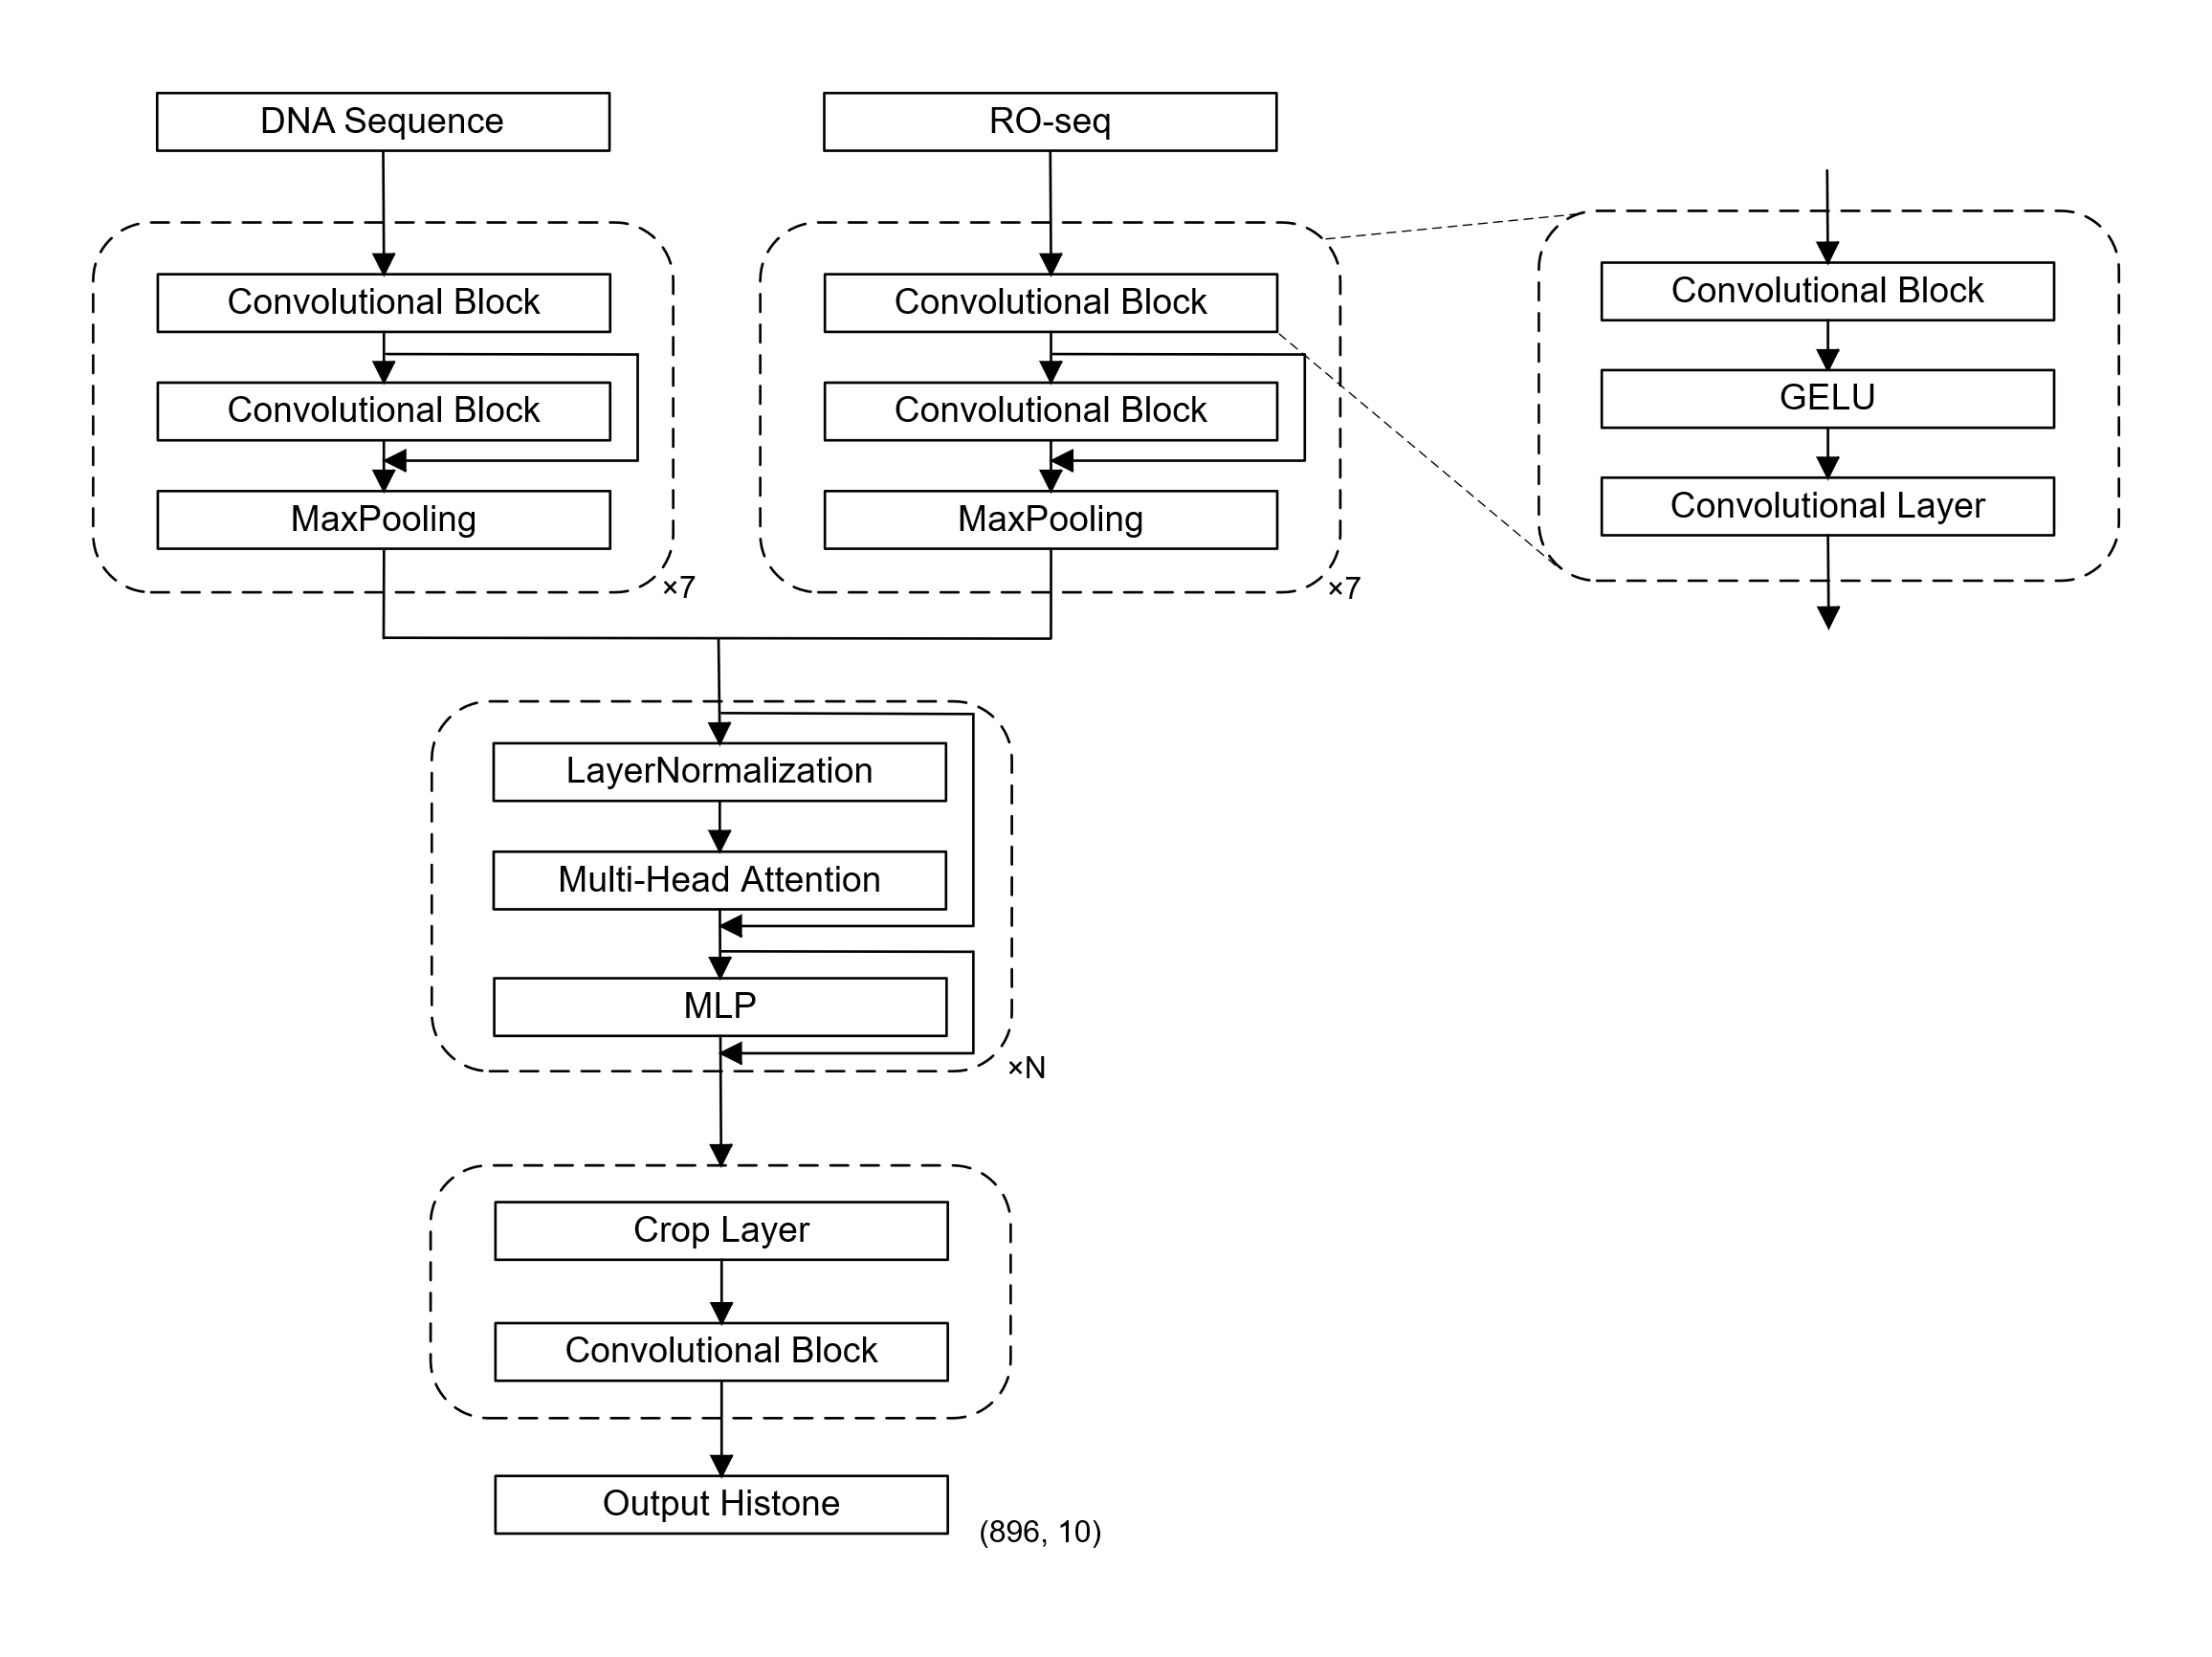
**

**Supplementary Figure S15. Model architecture for histone modification prediction.** For this task, the number of transformer layers *N* is set to 11.

**
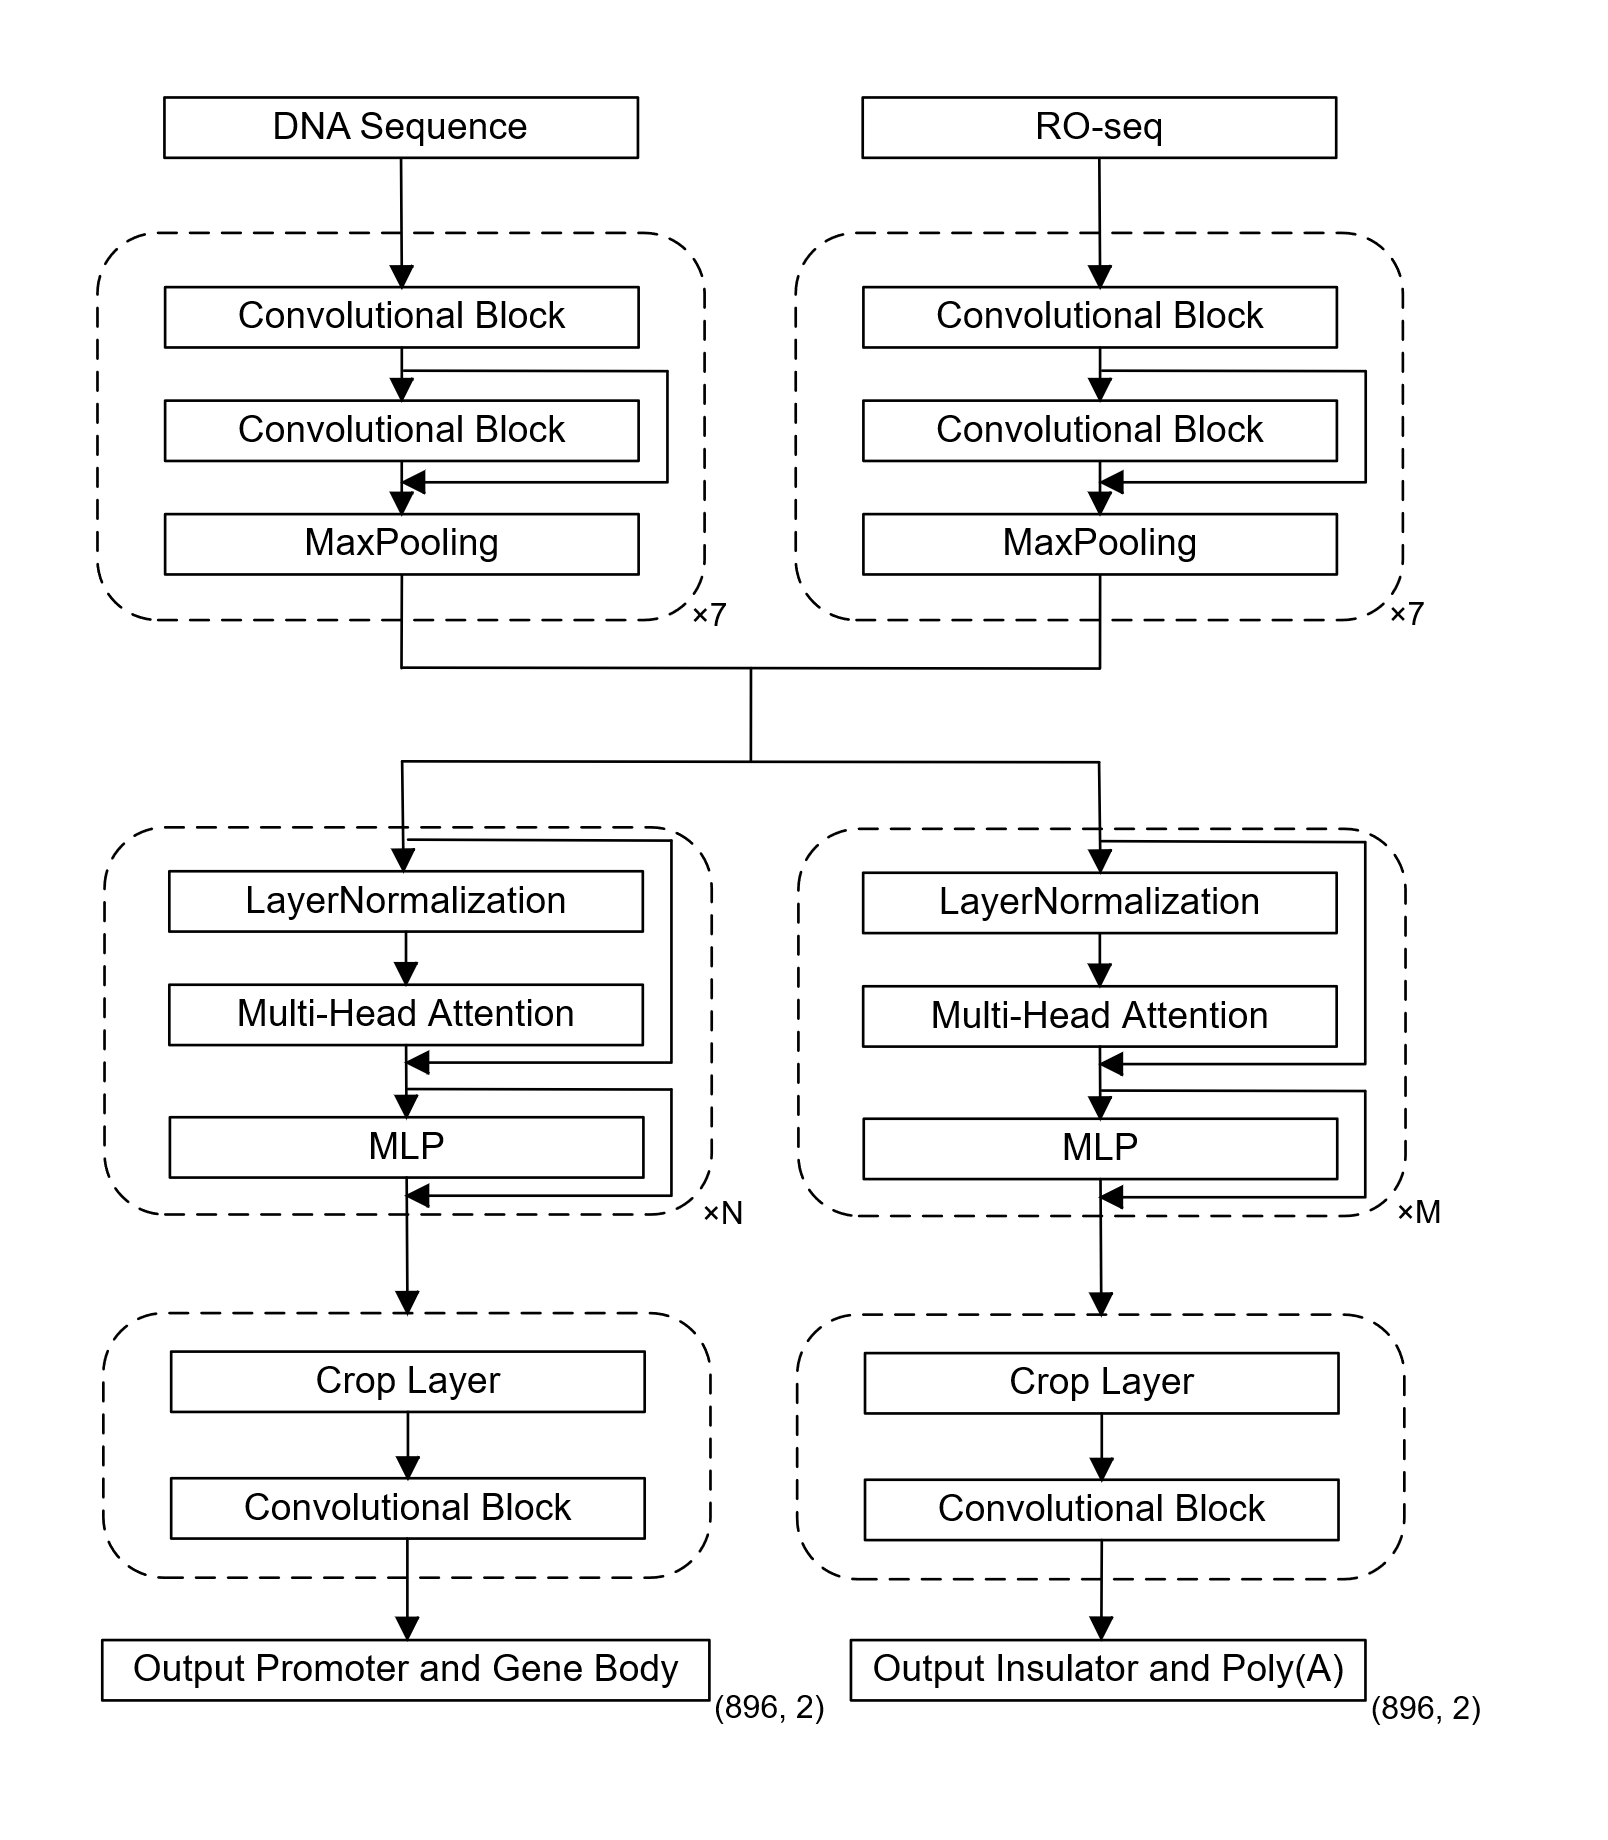
**

**Supplementary Figure S16. Model architecture for functional element prediction.** For this task, the numbers of Transformer layers *N* and *M* are both set to 11. The structure of the convolutional block is illustrated in Supplementary Figure S15.

**
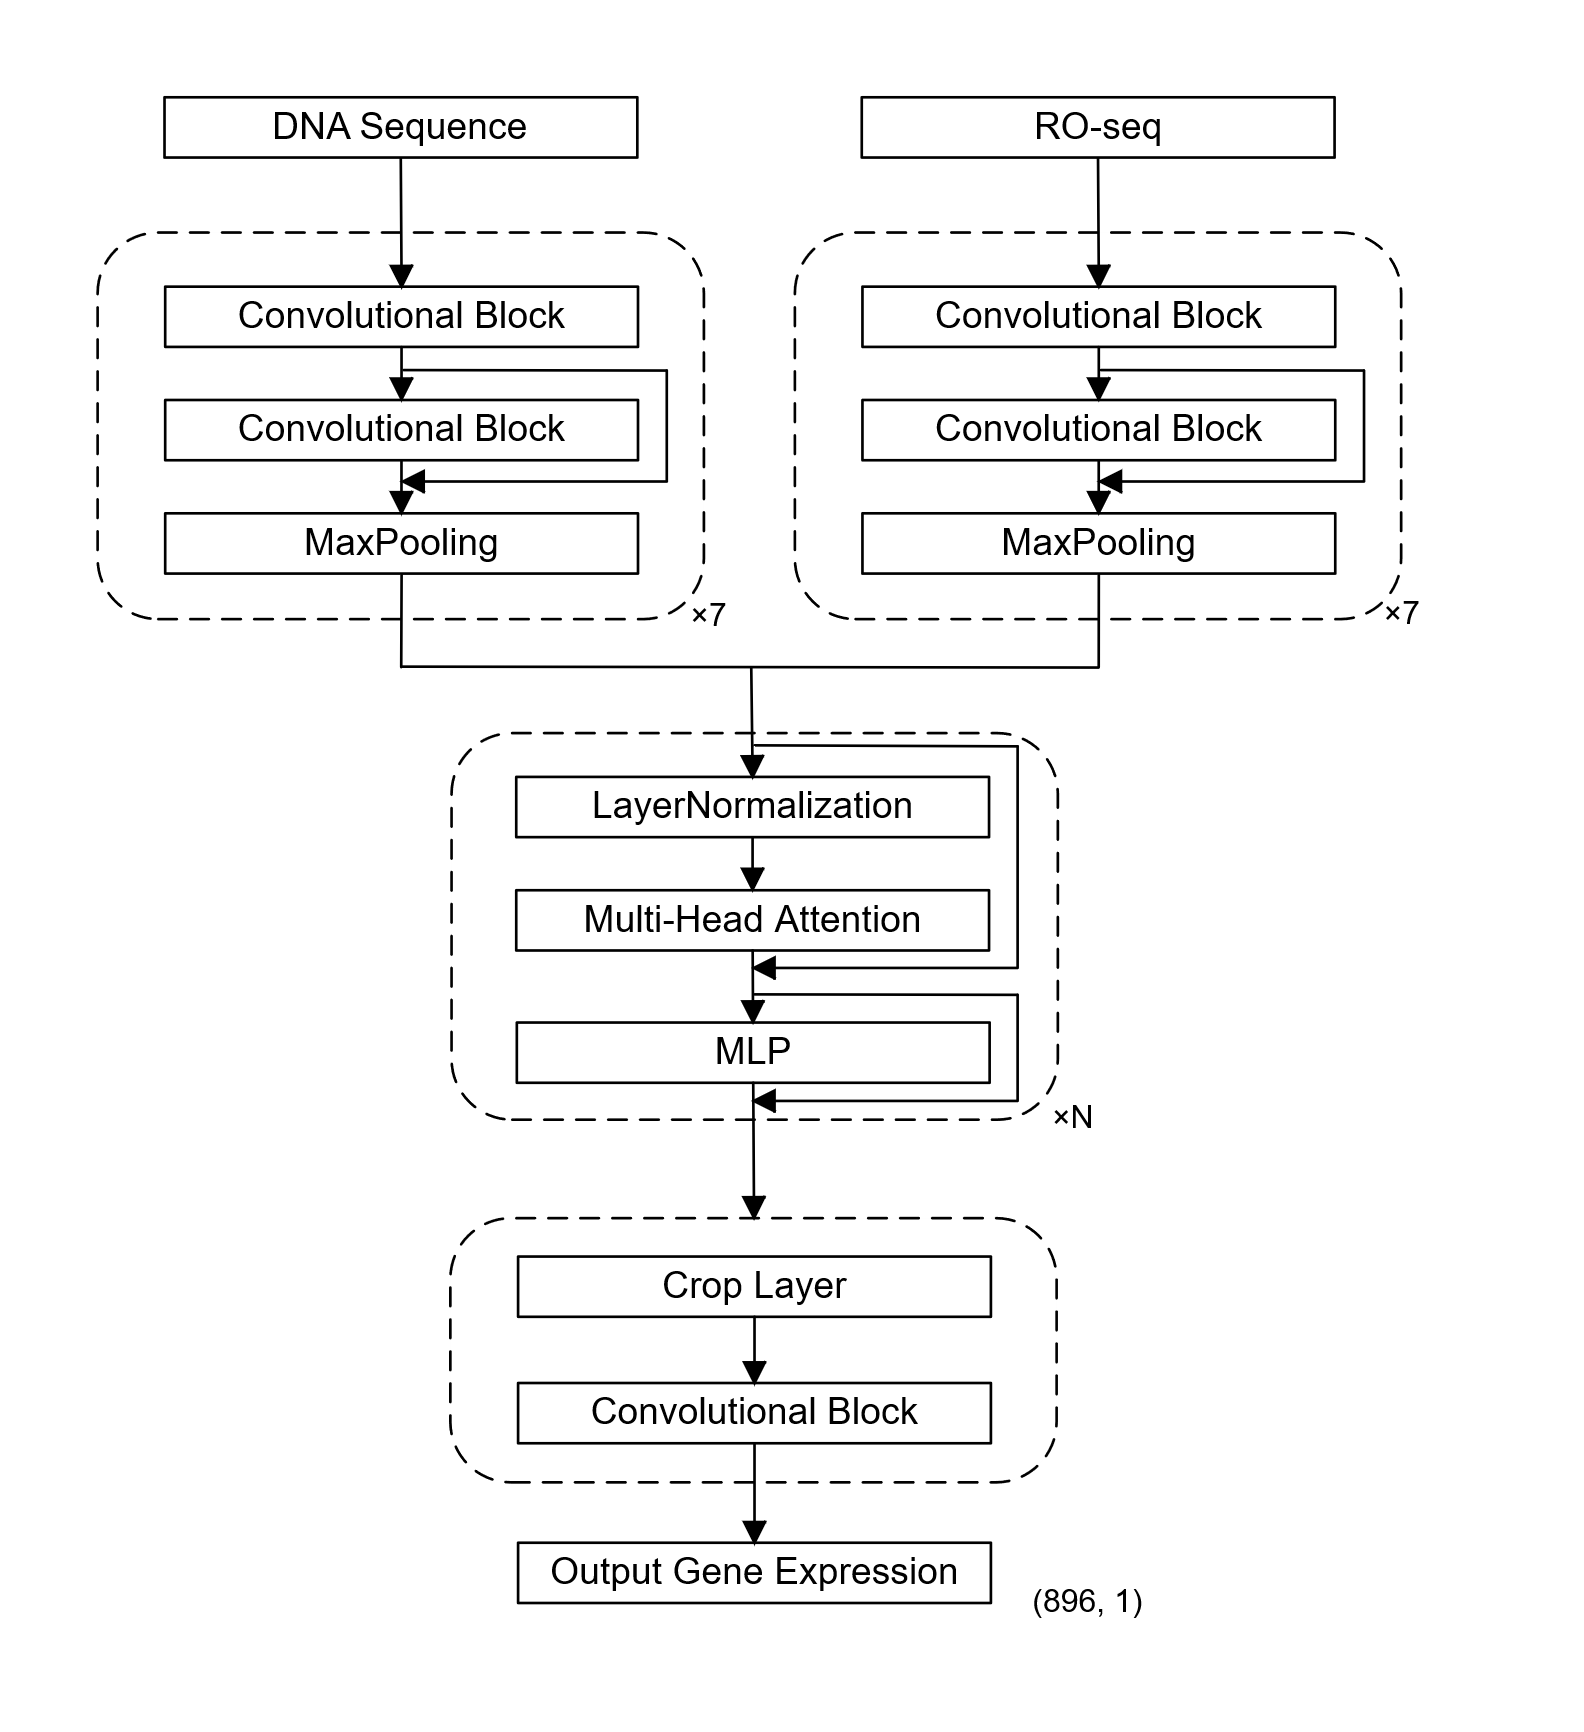
**

**Supplementary Figure S17. Model architecture for gene expression prediction.** For this task, the number of Transformer layers *N* is set to 11. The structure of the convolutional block is illustrated in Supplementary Figure S15.

**
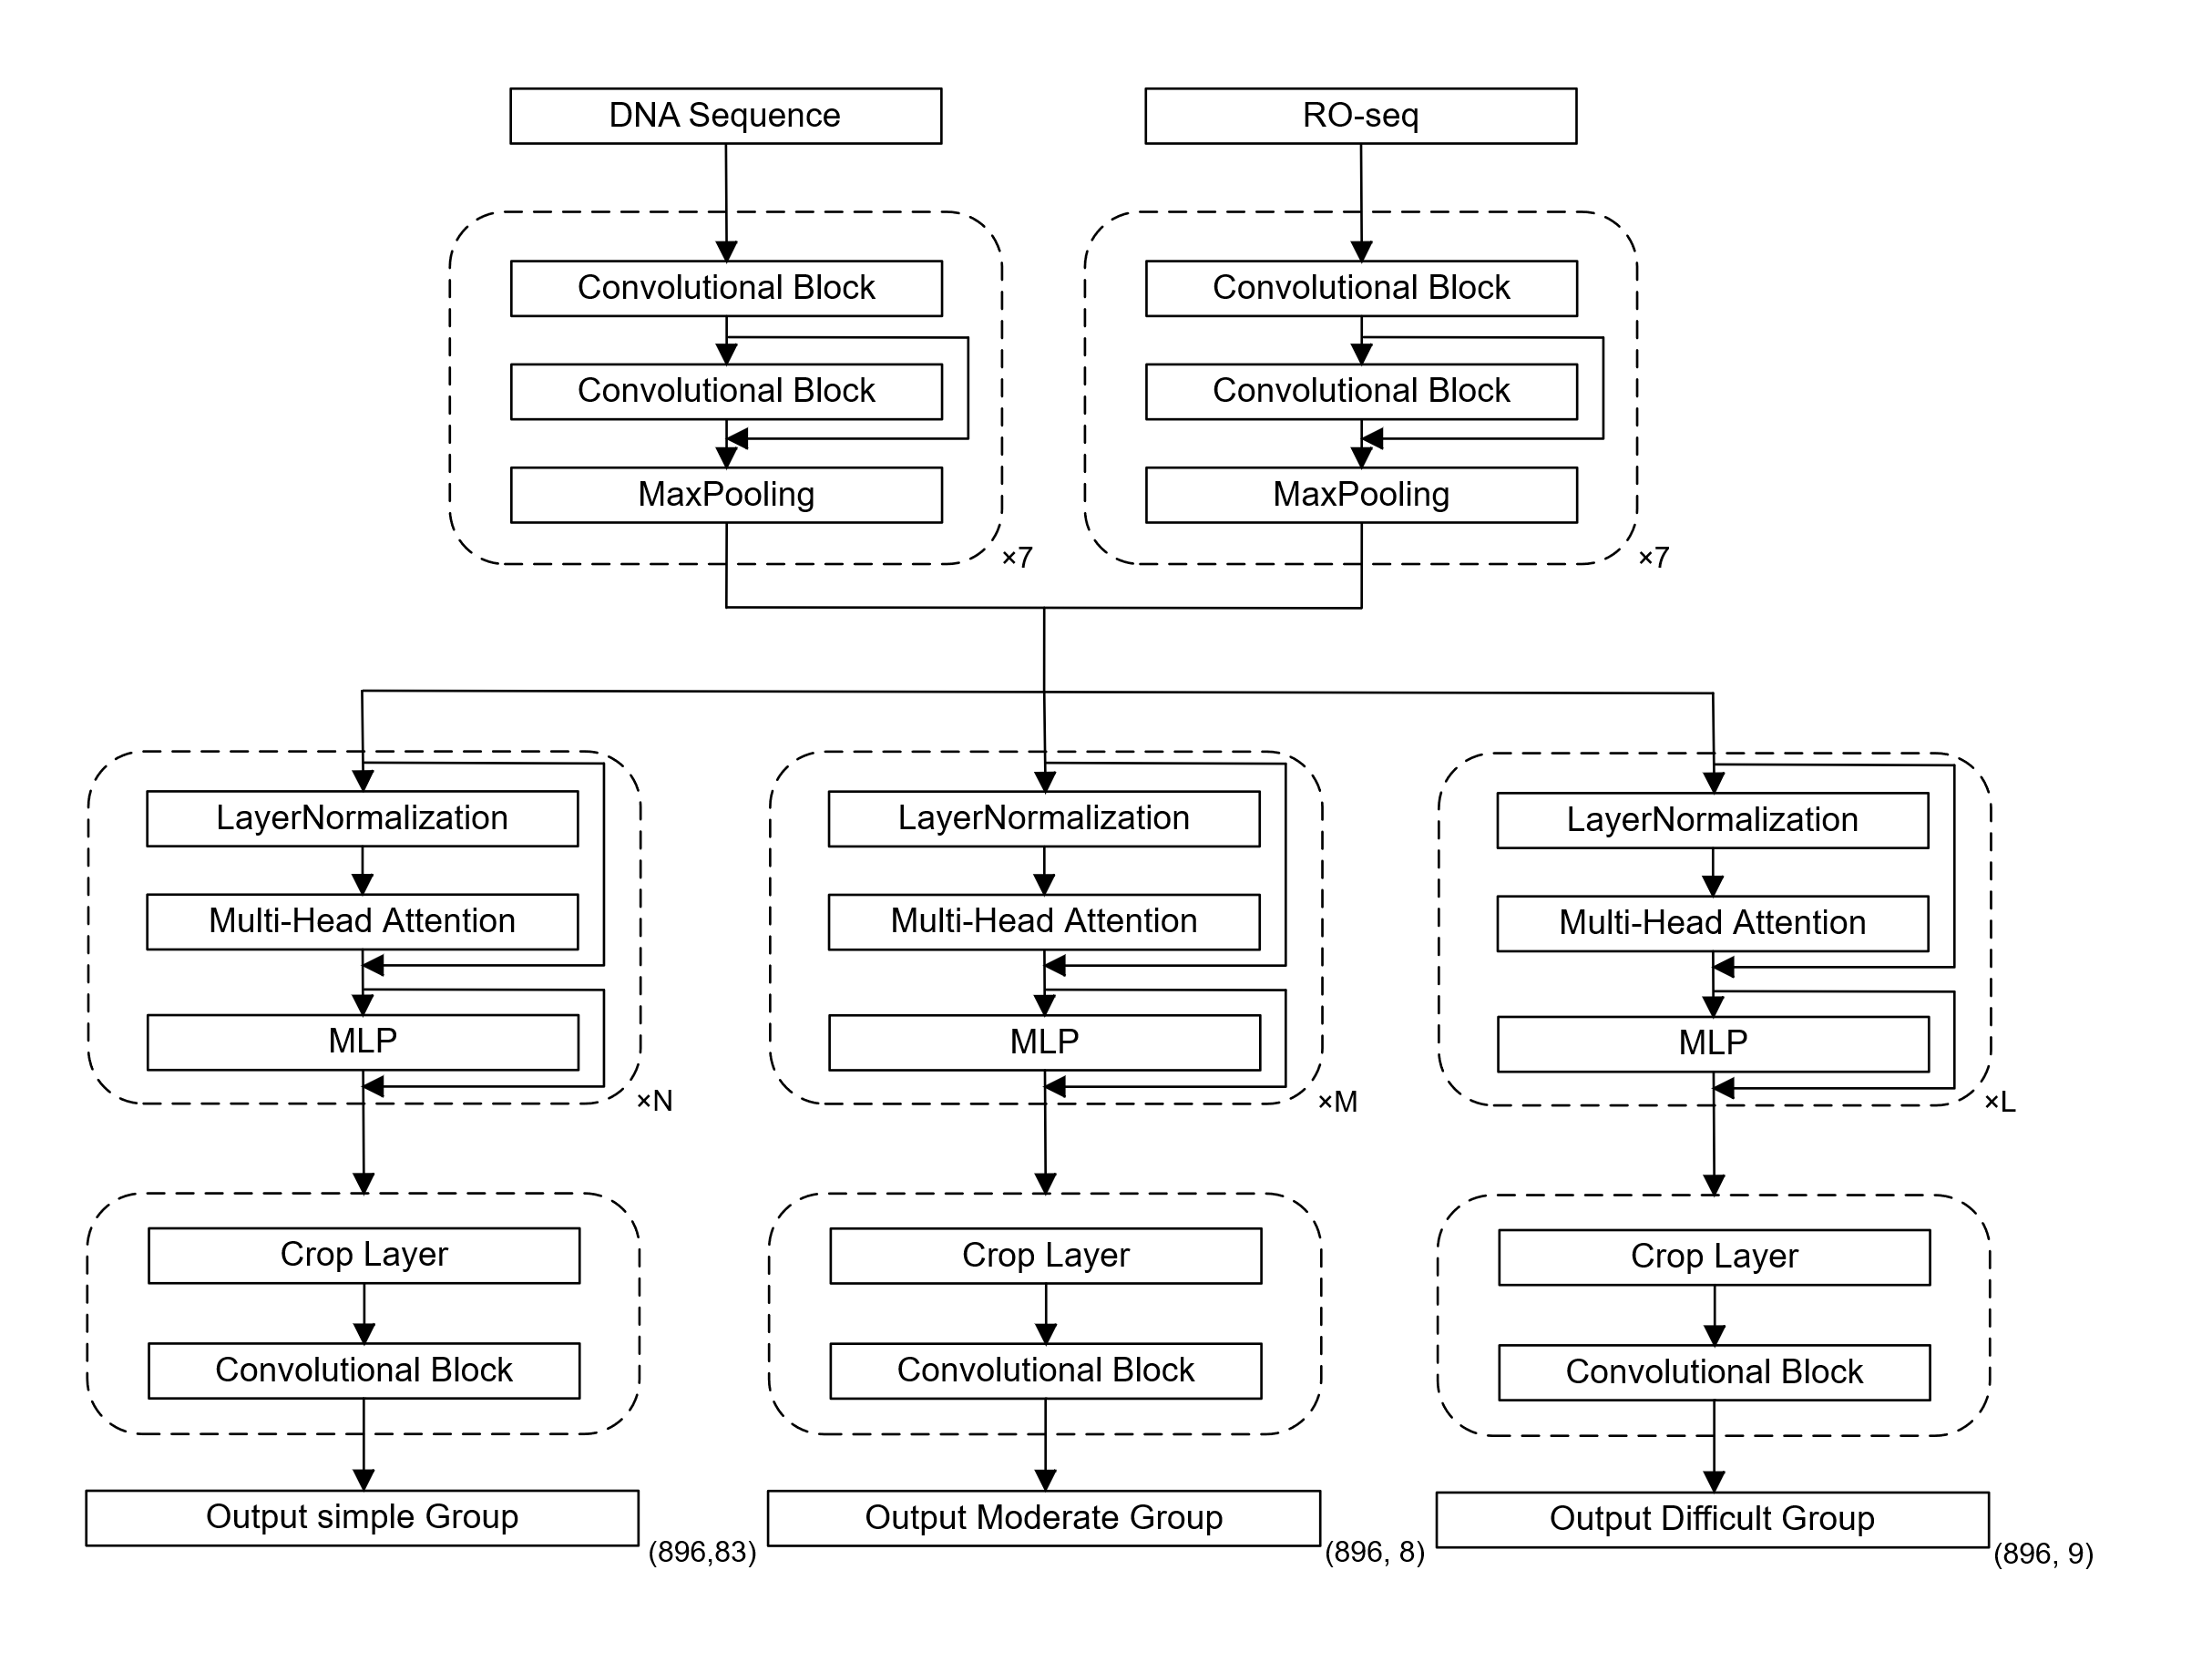
**

**Supplementary Figure S18. Model architecture for TFBS prediction.** For this task, the numbers of Transformer layers *N*, *M*, and *L* are all set to 11. The structure of the convolutional block is illustrated in Supplementary Figure S15.

**Supplement Table**

**Supplementary Table S1: Sources of PRO-seq data used for BioSeq2Seq model training and evaluation.** Columns include the dataset ID, chromosome, data type, cell type or sample ID, organism, GEO/dbGaP accession, contributing lab and institution, sequencing depth, dataset role (training or test), and corresponding reference.

| **ID** | **Chromosome** | **Data Type** | **Cell type/ Sample ID** | **Organism** | **GEO/dbGaP ID** | **Lab** | **Institution** | **Sequencing Depth** | **Training/ test** | **Reference** |
| --- | --- | --- | --- | --- | --- | --- | --- | --- | --- | --- |
| G1 | except chr22 | PRO-seq | K562 | Human | GSM1480327 | Lis | Cornell University | 374946808 | Training | Nat Genet. 2014 Dec;46(12):1311-20. PMID: 25383968 |
| G2 | except chr22 | GRO-seq | K562 | Human | GSM1480325 | Lis | Cornell University | 18129333 | Training | Nat Genet. 2014 Dec;46(12):1311-20. PMID: 25383968 |
| G3 | except chr22 | PRO-seq | K562 | Human | GSM3452725 | Danko | Cornell University | 57520888 | Training | Genome Res. 2019 Feb;29(2):293-303. PMID: 30573452 |
| G4 | except chr22 |  | K562 |  |  |  |  |  | Training |  |
| G5 | except chr22 | PRO-seq | K562 | Human | GSM2361442,  GSM2361443 | Sistonen | Åbo Akademi University | 71452942 | Training | Nat Commun. 2017 Aug 15;8(1):255. PMID: 28811569 |
| G6 | except chr22 | PRO-seq | K562 | Human | GSM2545324 | Lis | Cornell University | 26972822 | Training | Genome Res. 2017 Nov;27(11):1816-1829. PMID: 29025894 |
| G7 | except chr22 | PRO-seq | K562 | Human | GSM2545325 | Lis | Cornell University | 27046373 | Training | Genome Res. 2017 Nov;27(11):1816-1829. PMID: 29025894 |
| G1 | chr22 | PRO-seq | K562 | Human | GSM1480327 | Lis | Cornell University | 374946808 | Test | Nat Genet. 2014 Dec;46(12):1311-20. PMID: 25383968 |
| G2 | chr22 | GRO-seq | K562 | Human | GSM1480325 | Lis | Cornell University | 18129333 | Test | Nat Genet. 2014 Dec;46(12):1311-20. PMID: 25383968 |
| G3 | chr22 | PRO-seq | K562 | Human | GSM3452725 | Danko | Cornell University | 57520888 | Test | Genome Res. 2019 Feb;29(2):293-303. PMID: 30573452 |
| G4 | chr22 |  | K562 |  |  |  |  |  |  |  |
| G5 | chr22 | PRO-seq | K562 | Human | GSM2361442,  GSM2361443 | Sistonen | Åbo Akademi University | 71452942 | Test | Nat Commun. 2017 Aug 15;8(1):255. PMID: 28811569 |
| G6 | chr22 | PRO-seq | K562 | Human | GSM2545324 | Lis | Cornell University | 26972822 | Test | Genome Res. 2017 Nov;27(11):1816-1829. PMID: 29025894 |
| G7 | chr22 | PRO-seq | K562 | Human | GSM2545325 | Lis | Cornell University | 27046373 | Test | Genome Res. 2017 Nov;27(11):1816-1829. PMID: 29025894 |
| G8 | whole genome | GRO-seq | K562 | Human | GSM1622612,  GSM1622613,  GSM1622614,  GSM1622615 | Sistonen | Åbo Akademi University | 49159579 | Test | Genome Biol. 2015 Jul 28;16:153. PMID: 26259101 |
| GM | whole genome | GRO-seq | GM12878 | Human | GSM1480326 | Lis | Cornell University | 105936649 | Test | Nat Genet. 2014 Dec;46(12):1311-20. PMID: 25383968 |
| GH | whole genome | GRO-seq | HCT116 | Human | GSM1304424,  GSM1304425 | Espinosa | University of Colorado, Boulder | 118728260 | Test | Elife. 2014 May 27;3:e02200. PMID: 24867637 |
| CD4 | whole genome | PRO-seq | CD4 | Human | GSM2265095 | Danko | Cornell University | 33087414 | Test | Nat Ecol Evol. 2018 Mar;2(3):537-548. PMID: 29379187 |
| H1 | whole genome | GRO-seq | HELA | Human | GSE62046 | Lis | Cornell University | 5812515 | Test | Nat Commun. 2014 Nov 12;5:5336. PMID: 25387874 |
| IMR-90 | whole genome |  | IMR-90 | Human |  |  |  | 33717278 | Test |  |
| MCF7 | whole genome |  | MCF7 | Human |  |  |  | 72614853 | Test |  |
| HepG2 | whole genome | GRO-seq | HepG2 | Human | GSM2428726，GSE92375 | Minna U Kaikkonen | University of Eastern Finland | 985411245 | Test |  |
| Liver | whole genome | PRO-seq |  | Mus musculus | GSM3386268 | Katherine Ann Alexander | University of Pennsylvania | 1044456 | Test |  |

**Supplementary Table S2: Supplementary Table S2: Sources of ChIP-seq data used for BioSeq2Seq model training and evaluation.** Columns include the histone mark, cell type, organism, GEO or SRA accession ID, data usage (training or test), contributing lab and institution, reference, antibody used, and fragmentation type.

| **Histone Mark** | **Cell type** | **Organism** | **GEO/ SRA ID** | **Training/ test** | **Lab** | **Institution** | **Reference** | **Antibody** | **Fragmentation type** |
| --- | --- | --- | --- | --- | --- | --- | --- | --- | --- |
| H3K4me2 | K562 | Human | GSM733651 | Training | Bernstein | ENCODE Broad | Nature 2012 Sep 6;489(7414):57-74. PMID: 22955616 | ab7766 | Sonication, 200-700 bp |
| H3K4me3 | K562 | Human | GSM733680 | Training | Bernstein | ENCODE Broad | Nature 2012 Sep 6;489(7414):57-74. PMID: 22955616 | ab8580; 07-473 | Sonication, 200-700 bp |
| H3K9ac | K562 | Human | GSM733778 | Training | Bernstein | ENCODE Broad | Nature 2012 Sep 6;489(7414):57-74. PMID: 22955616 | ab4441 | Sonication, 200-700 bp |
| H3K27ac | K562 | Human | GSM733656 | Training | Bernstein | ENCODE Broad | Nature 2012 Sep 6;489(7414):57-74. PMID: 22955616 | ab4729 | Sonication, 200-700 bp |
| H3K122ac | K562 | Human | GSM2054695 | Training | Bickmore | University of Essex, School of Biological Science | Nat Genet 2016 Jun;48(6):681-6. PMID: 27089178 | Custom (Tropberger. Cell. 2013, Pages 859-872) | MNase, Mononucleosomes |
| H3K4me1 | K562 | Human | GSM733692 | Training | Bernstein | ENCODE Broad | Nature 2012 Sep 6;489(7414):57-74. PMID: 22955616 | ab8895 | Sonication, 200-700 bp |
| H3K36me3 | K562 | Human | GSM733714 | Training | Bernstein | ENCODE Broad | Nature 2012 Sep 6;489(7414):57-74. PMID: 22955616 | ab9050 | Sonication, 200-700 bp |
| H4K20me1 | K562 | Human | GSM733675 | Training | Bernstein | ENCODE Broad | Nature 2012 Sep 6;489(7414):57-74. PMID: 22955616 | ab9051 | Sonication, 200-700 bp |
| H3K27me3 | K562 | Human | GSM733658 | Training | Bernstein | ENCODE Broad | Nature 2012 Sep 6;489(7414):57-74. PMID: 22955616 | 07-449 | Sonication, 200-700 bp |
| H3K9me3 | K562 | Human | GSM733776 | Training | Bernstein | ENCODE Broad | Nature 2012 Sep 6;489(7414):57-74. PMID: 22955616 | ab8898 | Sonication, 200-700 bp |
| H3K4me2 | GM12878 | Human | GSM733769 | Testing | Bernstein | ENCODE Broad | Nature 2012 Sep 6;489(7414):57-74. PMID: 22955616 | ab7766 | Sonication, 200-700 bp |
| H3K4me3 | GM12878 | Human | GSM733708 | Testing | Bernstein | ENCODE Broad | Nature 2012 Sep 6;489(7414):57-74. PMID: 22955616 | ab8580; 07-473 | Sonication, 200-700 bp |
| H3K9ac | GM12878 | Human | GSM733677 | Testing | Bernstein | ENCODE Broad | Nature 2012 Sep 6;489(7414):57-74. PMID: 22955616 | ab4441 | Sonication, 200-700 bp |
| H3K27ac | GM12878 | Human | GSM733771 | Testing | Bernstein | ENCODE Broad | Nature 2012 Sep 6;489(7414):57-74. PMID: 22955616 | ab4729 | Sonication, 200-700 bp |
| H3K4me1 | GM12878 | Human | GSM733772 | Testing | Bernstein | ENCODE Broad | Nature 2012 Sep 6;489(7414):57-74. PMID: 22955616 | ab8895 | Sonication, 200-700 bp |
| H3K36me3 | GM12878 | Human | GSM733679 | Testing | Bernstein | ENCODE Broad | Nature 2012 Sep 6;489(7414):57-74. PMID: 22955616 | ab9050 | Sonication, 200-700 bp |
| H4K20me1 | GM12878 | Human | GSM733642 | Testing | Bernstein | ENCODE Broad | Nature 2012 Sep 6;489(7414):57-74. PMID: 22955616 | ab9051 | Sonication, 200-700 bp |
| H3K27me3 | GM12878 | Human | GSM733758 | Testing | Bernstein | ENCODE Broad | Nature 2012 Sep 6;489(7414):57-74. PMID: 22955616 | 07-449 | Sonication, 200-700 bp |
| H3K4me2 | HCT116 | Human | GSE96381 | Testing | Bernstein | ENCODE Broad | Nature 2012 Sep 6;489(7414):57-74. PMID: 22955616 | Milipore, 07-030 | Sonication, 200-700 bp |
| H3K4me3 | HCT116 | Human | GSE96123 | Testing | Bernstein | ENCODE Broad | Nature 2012 Sep 6;489(7414):57-74. PMID: 22955616 | Miliport, 07-473; Abcam ab8580 | Sonication, 200-700 bp |
| H3K9ac | HCT116 | Human | GSE95916 | Testing | Bernstein | ENCODE Broad | Nature 2012 Sep 6;489(7414):57-74. PMID: 22955616 | ab4441 | Sonication, 200-700 bp |
| H3K27ac | HCT116 | Human | GSE96299 | Testing | Bernstein | ENCODE Broad | Nature 2012 Sep 6;489(7414):57-74. PMID: 22955616 | Active motif, 39133 | Sonication, 200-700 bp |
| H3K4me1 | HCT116 | Human | GSE95958 | Testing | Bernstein | ENCODE Broad | Nature 2012 Sep 6;489(7414):57-74. PMID: 22955616 | ab8895 | Sonication, 200-700 bp |
| H3K36me3 | HCT116 | Human | GSE95914 | Testing | Bernstein | ENCODE Broad | Nature 2012 Sep 6;489(7414):57-74. PMID: 22955616 | ab9050 | Sonication, 200-700 bp |
| H4K20me1 | HCT116 | Human | GSE96185 | Testing | Bernstein | ENCODE Broad | Nature 2012 Sep 6;489(7414):57-74. PMID: 22955616 | ab9051 | Sonication, 200-700 bp |
| H3K27me3 | HCT116 | Human | GSE86755 | Testing | Bernstein | ENCODE Broad | Nature 2012 Sep 6;489(7414):57-74. PMID: 22955616 | Milipore, 07-449 | Sonication, 200-700 bp |
| H3K4me2 | HeLa | Human | GSM733734 | Testing | Bernstein | ENCODE Broad | Nature 2012 Sep 6;489(7414):57-74. PMID: 22955616 | ab7766 | Sonication, 200-700 bp |
| H3K4me3 | HeLa | Human | GSM733682 | Testing | Bernstein | ENCODE Broad | Nature 2012 Sep 6;489(7414):57-74. PMID: 22955616 | ab8580; 07-473 | Sonication, 200-700 bp |
| H3K9ac | HeLa | Human | GSM733756 | Testing | Bernstein | ENCODE Broad | Nature 2012 Sep 6;489(7414):57-74. PMID: 22955616 | ab4441 | Sonication, 200-700 bp |
| H3K27ac | HeLa | Human | GSM733684 | Testing | Bernstein | ENCODE Broad | Nature 2012 Sep 6;489(7414):57-74. PMID: 22955616 | ab4729 | Sonication, 200-700 bp |
| H3K4me1 | HeLa | Human | GSM798322 | Testing | Bernstein | ENCODE Broad | Nature 2012 Sep 6;489(7414):57-74. PMID: 22955616 | ab8895 | Sonication, 200-700 bp |
| H3K36me3 | HeLa | Human | GSM733711 | Testing | Bernstein | ENCODE Broad | Nature 2012 Sep 6;489(7414):57-74. PMID: 22955616 | ab9050 | Sonication, 200-700 bp |
| H4K20me1 | HeLa | Human | GSM733689 | Testing | Bernstein | ENCODE Broad | Nature 2012 Sep 6;489(7414):57-74. PMID: 22955616 | ab9051 | Sonication, 200-700 bp |
| H3K27me3 | HeLa | Human | GSM733696 | Testing | Bernstein | ENCODE Broad | Nature 2012 Sep 6;489(7414):57-74. PMID: 22955616 | 07-449 | Sonication, 200-700 bp |
| H3K4me3 | CD4+ T-cells | Human | SRR001414,  SRR001419,  SRR001420,  SRR001421,  SRR001430,  SRR001431,  SRR001432 | Testing | Zhao K | NIH | Cell 2007 129 (4): 823-37. PMID: 17512414 | ab8580 | Sonication, 200-300 bp |
| H3K9ac | CD4+ T-cells | Human | SRR037853 | Testing | Zhao K | NIH | Cell. 2009 Sep 4;138(5):1019-31. PMID: 19698979 | Not reported | Sonication, 200-300 bp |
| H3K4me1 | CD4+ T-cells | Human | SRR001439,  SRR001444,  SRR001445,  SRR001446 | Testing | Zhao K | NIH | Cell 2007 129 (4): 823-37. PMID: 17512414 | ab8895 | Sonication, 200-300 bp |
| H3K27me3 | CD4+ T-cells | Human | SRR001426,  SRR001427,  SRR001428,  SRR001429 | Testing | Zhao K | NIH | Cell 2007 129 (4): 823-37. PMID: 17512414 | Upstate 07-449 | Sonication, 200-300 bp |
| H3K36me3 | CD4+ T-cells | Human | SRR001392,  SRR001393,  SRR001394,  SRR001450 | Testing | Zhao K | NIH | Cell 2007 129 (4): 823-37. PMID: 17512414 | ab9050 | Sonication, 200-300 bp |
| H3K4me1 | IMR-90 | Human | [ENCFF159UXL](https://www.encodeproject.org/files/ENCFF159UXL/) | Testing | Zhiping Weng | ENCODE Broad |  |  |  |
| H3K4me2 | IMR-90 | Human | [ENCFF502IRW](https://www.encodeproject.org/files/ENCFF502IRW/) | Testing | Zhiping Weng | ENCODE Broad |  |  |  |
| H3K4me3 | IMR-90 | Human | [ENCFF545BBZ](https://www.encodeproject.org/files/ENCFF545BBZ/) | Testing | Zhiping Weng | ENCODE Broad |  |  |  |
| H3K27ac | IMR-90 | Human | [ENCFF801HPN](https://www.encodeproject.org/files/ENCFF222IQN/) | Testing | Zhiping Weng | ENCODE Broad |  |  |  |
| H3K27me3 | IMR-90 | Human | [ENCFF328UMQ](https://www.encodeproject.org/files/ENCFF328UMQ/) | Testing | Zhiping Weng | ENCODE Broad |  |  |  |
| H3K36me3 | IMR-90 | Human | [ENCFF187AAC](https://www.encodeproject.org/files/ENCFF187AAC/) | Testing | Zhiping Weng | ENCODE Broad |  |  |  |
| H3K9ac | IMR-90 | Human | [ENCFF606CWZ](https://www.encodeproject.org/files/ENCFF606CWZ/) | Testing | Zhiping Weng | ENCODE Broad |  |  |  |
| H3K9me3 | IMR-90 | Human | [ENCFF545BBZ](https://www.encodeproject.org/files/ENCFF545BBZ/) | Testing | Zhiping Weng | ENCODE Broad |  |  |  |
| H4K20me1 | IMR-90 | Human | [ENCFF025PLZ](https://www.encodeproject.org/files/ENCFF025PLZ/) | Testing | Zhiping Weng | ENCODE Broad |  |  |  |
| H3K4me1 | MCF7 | Human | [ENCFF407HFV](https://www.encodeproject.org/files/ENCFF407HFV/) | Testing | Gerstein M | ENCODE Broad | Nature methods. 2020 17:807-815.PMCID: PMC8073243 |  |  |
| H3K4me2 | MCF7 | Human | [ENCFF732IHS](https://www.encodeproject.org/files/ENCFF732IHS/) | Testing | Gerstein M | ENCODE Broad | Nature methods. 2020 17:807-815.PMCID: PMC8073243 |  |  |
| H3K4me3 | MCF7 | Human | [ENCFF205OYE](https://www.encodeproject.org/files/ENCFF205OYE/) | Testing | Mark Gerstein | ENCODE Broad | Nat Commun 2020 11(1) 3696 PMID: 32728046 |  |  |
| H3K27ac | MCF7 | Human | [ENCFF276WAM](https://www.encodeproject.org/files/ENCFF276WAM/) | Testing | Mark Gerstein | ENCODE Broad | Nat Commun 2020 11(1) 3696 PMID: 32728046 |  |  |
| H3K27me3 | MCF7 | Human | [ENCFF904SHG](https://www.encodeproject.org/files/ENCFF904SHG/) | Testing | Mark Gerstein | ENCODE Broad | Nat Commun 2020 11(1) 3696 PMID: 32728046 |  |  |
| H3K36me3 | MCF7 | Human | [ENCFF232HHP](https://www.encodeproject.org/files/ENCFF232HHP/) | Testing | Bradley Bernstein | ENCODE Broad |  |  |  |
| H3K9ac | MCF7 | Human | [ENCFF814UFD](https://www.encodeproject.org/files/ENCFF814UFD/) | Testing | Gerstein M | ENCODE Broad | Nature methods. 2020 17:807-815.PMCID: PMC8073243 |  |  |
| H3K9me3 | MCF7 | Human | ENCFF167WUM | Testing | Mark Gerstein | ENCODE Broad | Nat Commun 2020 11(1) 3696 PMID: 32728054 |  |  |
| H4K20me1 | MCF7 | Human | [ENCFF220WUF](https://www.encodeproject.org/files/ENCFF220WUF/) | Testing | Peggy Farnham | ENCODE Broad | Nat Commun 2020 11(1) 3696 PMID: 32728046 |  |  |
| H3K4me1 | HepG2 | Human | [ENCFF436IHQ](https://www.encodeproject.org/files/ENCFF436IHQ/) | Testing | Mark Gerstein | ENCODE Broad | Nat Commun 2020 11(1) 3696 PMID: 32728047 |  |  |
| H3K4me2 | HepG2 | Human | [ENCFF264QCV](https://www.encodeproject.org/files/ENCFF264QCV/) | Testing | Mark Gerstein | ENCODE Broad | Nat Commun 2020 11(1) 3696 PMID: 32728048 |  |  |
| H3K4me3 | HepG2 | Human | [ENCFF954GTG](https://www.encodeproject.org/files/ENCFF954GTG/) | Testing | Mark Gerstein | ENCODE Broad | Nat Commun 2020 11(1) 3696 PMID: 32728049 |  |  |
| H3K27ac | HepG2 | Human | [ENCFF866RVV](https://www.encodeproject.org/files/ENCFF866RVV/) | Testing | Mark Gerstein | ENCODE Broad | Nat Commun 2020 11(1) 3696 PMID: 32728050 |  |  |
| H3K27me3 | HepG2 | Human | [ENCFF954GTG](https://www.encodeproject.org/files/ENCFF954GTG/) | Testing | Mark Gerstein | ENCODE Broad | Nat Commun 2020 11(1) 3696 PMID: 32728051 |  |  |
| H3K36me3 | HepG2 | Human | [ENCFF695IBM](https://www.encodeproject.org/files/ENCFF695IBM/) | Testing | Mark Gerstein | ENCODE Broad | Nat Commun 2020 11(1) 3696 PMID: 32728052 |  |  |
| H3K9ac | HepG2 | Human | [ENCFF625TGK](https://www.encodeproject.org/files/ENCFF625TGK/) | Testing | Mark Gerstein | ENCODE Broad | Nat Commun 2020 11(1) 3696 PMID: 32728053 |  |  |
| H3K9me3 | HepG2 | Human | [ENCFF338EDE](https://www.encodeproject.org/files/ENCFF338EDE/) | Testing | Mark Gerstein | ENCODE Broad | Nat Commun 2020 11(1) 3696 PMID: 32728054 |  |  |
| H4K20me1 | HepG2 | Human | [ENCFF033MVR](https://www.encodeproject.org/files/ENCFF033MVR/) | Testing | Mark Gerstein | ENCODE Broad | Nat Commun 2020 11(1) 3696 PMID: 32728046 |  |  |
| H3K4me1 | Liver | Mus musculus | [ENCFF226OHW](https://www.encodeproject.org/files/ENCFF226OHW/) | Testing | Ecker JR | ENCODE Broad | Nature. 2020 583:752-759 PMCID:PMC7398276 |  |  |
| H3K4me2 | Liver | Mus musculus | [ENCFF746ECP](https://www.encodeproject.org/files/ENCFF746ECP/) | Testing | Ecker JR | ENCODE Broad | Nature. 2020 583:752-759 PMCID:PMC7398276 |  |  |
| H3K4me3 | Liver | Mus musculus | [ENCFF857LEB](https://www.encodeproject.org/files/ENCFF857LEB/) | Testing | Ecker JR | ENCODE Broad | Nature. 2020 583:752-759 PMCID:PMC7398276 |  |  |
| H3K27ac | Liver | Mus musculus | [ENCFF405UZH](https://www.encodeproject.org/files/ENCFF405UZH/) | Testing | Ecker JR | ENCODE Broad | Nature. 2020 583:752-759 PMCID:PMC7398277 |  |  |
| H3K27me3 | Liver | Mus musculus | [ENCFF109PQZ](https://www.encodeproject.org/files/ENCFF109PQZ/) | Testing | Ecker JR | ENCODE Broad | Nature. 2020 583:752-759 PMCID:PMC7398278 |  |  |
| H3K36me3 | Liver | Mus musculus | [ENCFF479ANG](https://www.encodeproject.org/files/ENCFF479ANG/) | Testing | Ecker JR | ENCODE Broad | Nature. 2020 583:752-759 PMCID:PMC7398279 |  |  |
| H3K9ac | Liver | Mus musculus | [ENCFF803QGM](https://www.encodeproject.org/files/ENCFF803QGM/) | Testing | Ecker JR | ENCODE Broad | Nature. 2020 583:752-759 PMCID:PMC7398280 |  |  |
| H3K9me3 | Liver | Mus musculus | [ENCFF098ALU](https://www.encodeproject.org/files/ENCFF098ALU/) | Testing | Ecker JR | ENCODE Broad | Nature. 2020 583:752-759 PMCID:PMC7398281 |  |  |

**Supplementary Table S3: Sources of RNA-seq data used for BioSeq2Seq model training and evaluation.**Columns include the cell type, organism, GEO or SRA accession ID, data usage (training or test), contributing lab, and reference.

| **Cell type** | **Organism** | **GEO/ SRA ID** | **Training/ Test** | **Lab** | **Reference** |
| --- | --- | --- | --- | --- | --- |
| K562 | Human | GSM765387 | Training | Harbor | PMID: 22019781;PMID: 22955974;PMID: 22955988;PMID: 25582907 |
| K562 | Human | [GSM758577](https://www.ncbi.nlm.nih.gov/geo/query/acc.cgi?acc=GSM758577) | Test | Harbor | PMID: 22019781;PMID: 22955974;PMID: 22955988;PMID: 25582907 |
| K562 | Human | [GSM765390](https://www.ncbi.nlm.nih.gov/geo/query/acc.cgi?acc=GSM765390) | Test | Harbor | PMID: 22019781;PMID: 22955974;PMID: 22955988;PMID: 25582907 |
| K562 | Human | [GSM765392](https://www.ncbi.nlm.nih.gov/geo/query/acc.cgi?acc=GSM765392) | Test | Harbor | PMID: 22019781;PMID: 22955974;PMID: 22955988;PMID: 25582907 |
| K562 | Human | [GSM765393](https://www.ncbi.nlm.nih.gov/geo/query/acc.cgi?acc=GSM765393) | Test | Harbor | PMID: 22019781;PMID: 22955974;PMID: 22955988;PMID: 25582907 |
| K562 | Human | [GSM765405](https://www.ncbi.nlm.nih.gov/geo/query/acc.cgi?acc=GSM765405) | Test | Harbor | PMID: 22019781;PMID: 22955974;PMID: 22955988;PMID: 25582907 |
| K562 | Human | [GSM767844](https://www.ncbi.nlm.nih.gov/geo/query/acc.cgi?acc=GSM767844) | Test | Harbor | PMID: 22019781;PMID: 22955974;PMID: 22955988;PMID: 25582907 |
| K562 | Human | [GSM767849](https://www.ncbi.nlm.nih.gov/geo/query/acc.cgi?acc=GSM767849) | Test | Harbor | PMID: 22019781;PMID: 22955974;PMID: 22955988;PMID: 25582907 |
| GM12878 | Human | GSM765386 | Test | Harbor | PMID: 22019781;PMID: 22955974;PMID: 22955988;PMID: 25582907 |
| GM12878 | Human | [GSM758559](https://www.ncbi.nlm.nih.gov/geo/query/acc.cgi?acc=GSM758559) | Test | Harbor | PMID: 22019781;PMID: 22955974;PMID: 22955988;PMID: 25582907 |
| GM12878 | Human | [GSM758560](https://www.ncbi.nlm.nih.gov/geo/query/acc.cgi?acc=GSM758560) | Test | Harbor | PMID: 22019781;PMID: 22955974;PMID: 22955988;PMID: 25582907 |
| GM12878 | Human | [GSM758572](https://www.ncbi.nlm.nih.gov/geo/query/acc.cgi?acc=GSM758572) | Test | Harbor | PMID: 22019781;PMID: 22955974;PMID: 22955988;PMID: 25582907 |
| GM12878 | Human | [GSM767852](https://www.ncbi.nlm.nih.gov/geo/query/acc.cgi?acc=GSM767852) | Test | Harbor | PMID: 22019781;PMID: 22955974;PMID: 22955988;PMID: 25582907 |
| GM12878 | Human | [GSM767853](https://www.ncbi.nlm.nih.gov/geo/query/acc.cgi?acc=GSM767853) | Test | Harbor | PMID: 22019781;PMID: 22955974;PMID: 22955988;PMID: 25582907 |
| GM12878 | Human | [GSM840138](https://www.ncbi.nlm.nih.gov/geo/query/acc.cgi?acc=GSM840138) | Test | Harbor | PMID: 22019781;PMID: 22955974;PMID: 22955988;PMID: 25582907 |
| GM12878 | Human | [GSM984605](https://www.ncbi.nlm.nih.gov/geo/query/acc.cgi?acc=GSM984605) | Test | Harbor | PMID: 22019781;PMID: 22955974;PMID: 22955988;PMID: 25582907 |
| IMR-90 | Human | GSM981248 | Test | Harbor | PMID: 22019781;PMID: 22955974;PMID: 22955988;PMID: 25582907 |
| IMR-90 | Human | GSM981243 | Test | Harbor | PMID: 22019781;PMID: 22955974;PMID: 22955988;PMID: 25582907 |
| IMR-90 | Human | [GSM981244](https://www.ncbi.nlm.nih.gov/geo/query/acc.cgi?acc=GSM981244) | Test | Harbor | PMID: 22019781;PMID: 22955974;PMID: 22955988;PMID: 25582907 |
| IMR-90 | Human | [GSM981249](https://www.ncbi.nlm.nih.gov/geo/query/acc.cgi?acc=GSM981249) | Test | Harbor | PMID: 22019781;PMID: 22955974;PMID: 22955988;PMID: 25582907 |
| MCF-7 | Human | GSM981245 | Test | Harbor | PMID: 22019781;PMID: 22955974;PMID: 22955988;PMID: 25582907 |
| MCF-7 | Human | [GSM765388](https://www.ncbi.nlm.nih.gov/geo/query/acc.cgi?acc=GSM765388) | Test | Harbor | PMID: 22019781;PMID: 22955974;PMID: 22955988;PMID: 25582907 |
| MCF-7 | Human | [GSM767851](https://www.ncbi.nlm.nih.gov/geo/query/acc.cgi?acc=GSM767851) | Test | Harbor | PMID: 22019781;PMID: 22955974;PMID: 22955988;PMID: 25582907 |
| MCF-7 | Human | [GSM981252](https://www.ncbi.nlm.nih.gov/geo/query/acc.cgi?acc=GSM981252) | Test | Harbor | PMID: 22019781;PMID: 22955974;PMID: 22955988;PMID: 25582907 |
| HepG2 | Human | GSM758568 | Test | Harbor | PMID: 22019781;PMID: 22955974;PMID: 22955988;PMID: 25582907 |
| HepG2 | Human | [GSM758567](https://www.ncbi.nlm.nih.gov/geo/query/acc.cgi?acc=GSM758567) | Test | Harbor | PMID: 22019781;PMID: 22955974;PMID: 22955988;PMID: 25582907 |
| HepG2 | Human | [GSM758575](https://www.ncbi.nlm.nih.gov/geo/query/acc.cgi?acc=GSM758575) | Test | Harbor | PMID: 22019781;PMID: 22955974;PMID: 22955988;PMID: 25582907 |
| HepG2 | Human | [GSM758576](https://www.ncbi.nlm.nih.gov/geo/query/acc.cgi?acc=GSM758576) | Test | Harbor | PMID: 22019781;PMID: 22955974;PMID: 22955988;PMID: 25582907 |
| HepG2 | Human | GSM767840 | Test | Harbor | PMID: 22019781;PMID: 22955974;PMID: 22955988;PMID: 25582907 |
| HepG2 | Human | GSM767850 | Test | Harbor | PMID: 22019781;PMID: 22955974;PMID: 22955988;PMID: 25582907 |

**Supplementary Table S4: Sources of TFBS data used for BioSeq2Seq model training and evaluation.** Columns list the transcription factor (TF) and the corresponding ENCODE accession IDs for six cell lines: K562, GM12878, HCT116, IMR-90, MCF-7, and HepG2. For each TF, the presence of one or more ENCODE file IDs in a given cell line column indicates the availability of ChIP-seq data used for TFBS prediction. Blank entries denote missing data for that TF in the corresponding cell line.

| **TF** | **K562** | **GM12878** | **HCT116** | **IMR-90** | **MCF-7** | **HepG2** |
| --- | --- | --- | --- | --- | --- | --- |
| TCF7 | [ENCFF862PIC](https://www.encodeproject.org/files/ENCFF862PIC/) | [ENCFF720HIA](https://www.encodeproject.org/files/ENCFF720HIA/) |  |  |  | [ENCFF457VAD](https://www.encodeproject.org/files/ENCFF457VAD/) |
| NRF1 | [ENCFF862RTJ](https://www.encodeproject.org/files/ENCFF862RTJ/) | [ENCFF716DZQ](https://www.encodeproject.org/files/ENCFF716DZQ/) |  |  | [ENCFF403JKC](https://www.encodeproject.org/files/ENCFF403JKC/) | [ENCFF213IBE](https://www.encodeproject.org/files/ENCFF213IBE/) |
| [JUNB](https://www.encodeproject.org/targets/JUNB-human/) | [ENCFF193ALV](https://www.encodeproject.org/files/ENCFF193ALV/) | [ENCFF273TMW](https://www.encodeproject.org/files/ENCFF273TMW/) |  |  |  |  |
| [NR2F6](https://www.encodeproject.org/targets/NR2F6-human/) | [ENCFF361KFD](https://www.encodeproject.org/files/ENCFF361KFD/) |  |  |  |  | [ENCFF552ZAM](https://www.encodeproject.org/files/ENCFF552ZAM/) |
| [RUNX1](https://www.encodeproject.org/targets/RUNX1-human/) | [ENCFF892CVA](https://www.encodeproject.org/files/ENCFF892CVA/) |  |  |  |  |  |
| [ZBTB11](https://www.encodeproject.org/targets/ZBTB11-human/) | [ENCFF953SAQ](https://www.encodeproject.org/files/ENCFF953SAQ/) |  |  |  | [ENCFF742ATC](https://www.encodeproject.org/files/ENCFF742ATC/) |  |
| [ZBED1](https://www.encodeproject.org/targets/ZBED1-human/) | [ENCFF986OUP](https://www.encodeproject.org/files/ENCFF986OUP/) | [ENCFF534KZJ](https://www.encodeproject.org/files/ENCFF534KZJ/) |  |  |  |  |
| [MBD2](https://www.encodeproject.org/targets/MBD2-human/) | [ENCFF388AJM](https://www.encodeproject.org/files/ENCFF388AJM/) |  |  |  | [ENCFF360HZC](https://www.encodeproject.org/files/ENCFF360HZC/) |  |
| [CREM](https://www.encodeproject.org/targets/CREM-human/) | [ENCFF131HAH](https://www.encodeproject.org/files/ENCFF131HAH/) | [ENCFF517YSM](https://www.encodeproject.org/files/ENCFF517YSM/) |  |  |  | [ENCFF322CDL](https://www.encodeproject.org/files/ENCFF322CDL/) |
| [ETV6](https://www.encodeproject.org/targets/ETV6-human/) | [ENCFF890OID](https://www.encodeproject.org/files/ENCFF890OID/) | [ENCFF481EUA](https://www.encodeproject.org/files/ENCFF481EUA/) |  |  |  |  |
| [SMAD5](https://www.encodeproject.org/targets/SMAD5-human/) | [ENCFF701AOA](https://www.encodeproject.org/files/ENCFF701AOA/) | [ENCFF572PHE](https://www.encodeproject.org/files/ENCFF572PHE/) |  |  |  |  |
| [SP1](https://www.encodeproject.org/targets/SP1-human/) | [ENCFF545HSY](https://www.encodeproject.org/files/ENCFF545HSY/) | [ENCFF000OEO](https://www.encodeproject.org/files/ENCFF000OEO/) | [ENCFF000PBZ](https://www.encodeproject.org/files/ENCFF000PBZ/) |  | [ENCFF007UHY](https://www.encodeproject.org/files/ENCFF007UHY/) | ENCFF417XUU |
| [NR2F1](https://www.encodeproject.org/targets/NR2F1-human/) | [ENCFF056YEU](https://www.encodeproject.org/files/ENCFF056YEU/) | [ENCFF819AJF](https://www.encodeproject.org/files/ENCFF819AJF/) |  |  |  |  |
| [RFX1](https://www.encodeproject.org/targets/RFX1-human/) | [ENCFF090JBA](https://www.encodeproject.org/files/ENCFF090JBA/) |  |  |  | [ENCFF041GWT](https://www.encodeproject.org/files/ENCFF041GWT/) | [ENCFF345DEN](https://www.encodeproject.org/files/ENCFF345DEN/) |
| [IKZF1](https://www.encodeproject.org/targets/IKZF1-human/) | [ENCFF777WTJ](https://www.encodeproject.org/files/ENCFF777WTJ/) | [ENCFF032EMH](https://www.encodeproject.org/files/ENCFF032EMH/) |  |  |  | [ENCFF486FNI](https://www.encodeproject.org/files/ENCFF486FNI/) |
| [TCF7L2](https://www.encodeproject.org/targets/TCF7L2-human/) | [ENCFF833DBR](https://www.encodeproject.org/files/ENCFF833DBR/) |  |  |  | [ENCFF000ZLI](https://www.encodeproject.org/files/ENCFF000ZLI/) | ENCFF527ZME |
| [ZKSCAN1](https://www.encodeproject.org/targets/ZKSCAN1-human/) | [ENCFF169POV](https://www.encodeproject.org/files/ENCFF169POV/) |  |  |  | [ENCFF736VZV](https://www.encodeproject.org/files/ENCFF736VZV/) | [ENCFF791YJK](https://www.encodeproject.org/files/ENCFF791YJK/) |
| [ZBTB33](https://www.encodeproject.org/targets/ZBTB33-human/) | [ENCFF675GYP](https://www.encodeproject.org/files/ENCFF675GYP/) | [ENCFF823JVZ](https://www.encodeproject.org/files/ENCFF823JVZ/) |  |  | [ENCFF973SCA](https://www.encodeproject.org/files/ENCFF973SCA/) | ENCFF717MOJ |
| [FOXA1](https://www.encodeproject.org/targets/FOXA1-human/) | [ENCFF459WEJ](https://www.encodeproject.org/files/ENCFF459WEJ/) |  |  |  | [ENCFF787PBQ](https://www.encodeproject.org/files/ENCFF787PBQ/) | [ENCFF540FMP](https://www.encodeproject.org/files/ENCFF540FMP/) |
| [SREBF1](https://www.encodeproject.org/targets/SREBF1-human/) | [ENCFF295KFF](https://www.encodeproject.org/files/ENCFF295KFF/) | [ENCFF085SPJ](https://www.encodeproject.org/files/ENCFF085SPJ/) |  |  | [ENCFF829MEE](https://www.encodeproject.org/files/ENCFF829MEE/) |  |
| [ZZZ3](https://www.encodeproject.org/targets/ZZZ3-human/) | [ENCFF712WEK](https://www.encodeproject.org/files/ENCFF712WEK/) | [ENCFF661CVS](https://www.encodeproject.org/files/ENCFF661CVS/) |  |  |  |  |
| [CEBPZ](https://www.encodeproject.org/targets/CEBPZ-human/) | [ENCFF707DVP](https://www.encodeproject.org/files/ENCFF707DVP/) | [ENCFF634ELX](https://www.encodeproject.org/files/ENCFF634ELX/) |  |  |  |  |
| [ELF1](https://www.encodeproject.org/targets/ELF1-human/) | [ENCFF357FKU](https://www.encodeproject.org/files/ENCFF357FKU/) | [ENCFF772RMA](https://www.encodeproject.org/files/ENCFF772RMA/) | [ENCFF000OZF](https://www.encodeproject.org/files/ENCFF000OZF/) |  | [ENCFF367GNZ](https://www.encodeproject.org/files/ENCFF367GNZ/) | [ENCFF081HCC](https://www.encodeproject.org/files/ENCFF081HCC/) |
| [ESRRA](https://www.encodeproject.org/targets/ESRRA-human/) | [ENCFF747PCD](https://www.encodeproject.org/files/ENCFF747PCD/) | [ENCFF329PQZ](https://www.encodeproject.org/files/ENCFF329PQZ/) |  |  | ENCFF265BKP |  |
| [NKRF](https://www.encodeproject.org/targets/NKRF-human/) | [ENCFF805PPB](https://www.encodeproject.org/files/ENCFF805PPB/) | [ENCFF795HSE](https://www.encodeproject.org/files/ENCFF795HSE/) |  |  |  |  |
| [FOXK2](https://www.encodeproject.org/targets/FOXK2-human/) | [ENCFF135OYM](https://www.encodeproject.org/files/ENCFF135OYM/) | [ENCFF486NOF](https://www.encodeproject.org/files/ENCFF486NOF/) |  |  | [ENCFF957ELP](https://www.encodeproject.org/files/ENCFF957ELP/) | [ENCFF523AHK](https://www.encodeproject.org/files/ENCFF523AHK/) |
| [ZBTB40](https://www.encodeproject.org/targets/ZBTB40-human/) | [ENCFF861YTF](https://www.encodeproject.org/files/ENCFF861YTF/) | [ENCFF744LEM](https://www.encodeproject.org/files/ENCFF744LEM/) |  |  | [ENCFF020EIS](https://www.encodeproject.org/files/ENCFF020EIS/) | ENCFF071QYT |
| [REST](https://www.encodeproject.org/targets/REST-human/) | [ENCFF686NWE](https://www.encodeproject.org/files/ENCFF686NWE/) | [ENCFF892PZK](https://www.encodeproject.org/files/ENCFF892PZK/) | [ENCFF000PAL](https://www.encodeproject.org/files/ENCFF000PAL/) |  | [ENCFF000QOR](https://www.encodeproject.org/files/ENCFF000QOR/) | [ENCFF966SKB](https://www.encodeproject.org/files/ENCFF966SKB/) |
| [PKNOX1](https://www.encodeproject.org/targets/PKNOX1-human/) | [ENCFF133FDG](https://www.encodeproject.org/files/ENCFF133FDG/) | [ENCFF093ATD](https://www.encodeproject.org/files/ENCFF093ATD/) |  |  | [ENCFF010KSK](https://www.encodeproject.org/files/ENCFF010KSK/) |  |
| [HES1](https://www.encodeproject.org/targets/HES1-human/) | [ENCFF989OSX](https://www.encodeproject.org/files/ENCFF989OSX/) |  |  |  | [ENCFF029BWR](https://www.encodeproject.org/files/ENCFF029BWR/) |  |
| [NFXL1](https://www.encodeproject.org/targets/NFXL1-human/) | [ENCFF452QYJ](https://www.encodeproject.org/files/ENCFF452QYJ/) | [ENCFF837JGZ](https://www.encodeproject.org/files/ENCFF837JGZ/) |  |  | [ENCFF825DAK](https://www.encodeproject.org/files/ENCFF825DAK/) |  |
| [ZNF407](https://www.encodeproject.org/targets/ZNF407-human/) | [ENCFF456JRF](https://www.encodeproject.org/files/ENCFF456JRF/) |  |  |  |  |  |
| [NEUROD1](https://www.encodeproject.org/targets/NEUROD1-human/) | [ENCFF325ZZV](https://www.encodeproject.org/files/ENCFF325ZZV/) |  |  |  |  |  |
| [E2F8](https://www.encodeproject.org/targets/E2F8-human/) | [ENCFF019NMV](https://www.encodeproject.org/files/ENCFF019NMV/) | [ENCFF591PLS](https://www.encodeproject.org/files/ENCFF591PLS/) |  |  | [ENCFF966KGE](https://www.encodeproject.org/files/ENCFF966KGE/) |  |
| [POU5F1](https://www.encodeproject.org/targets/POU5F1-human/) | [ENCFF252WJR](https://www.encodeproject.org/files/ENCFF252WJR/) |  |  |  |  |  |
| [ZNF282](https://www.encodeproject.org/targets/ZNF282-human/) | [ENCFF416JQZ](https://www.encodeproject.org/files/ENCFF416JQZ/) |  |  |  |  | [ENCFF794JSD](https://www.encodeproject.org/files/ENCFF794JSD/) |
| [E4F1](https://www.encodeproject.org/targets/E4F1-human/) | [ENCFF085VSJ](https://www.encodeproject.org/files/ENCFF085VSJ/) | [ENCFF095GKP](https://www.encodeproject.org/files/ENCFF095GKP/) |  |  | [ENCFF520SIO](https://www.encodeproject.org/files/ENCFF520SIO/) |  |
| ARNT | [ENCFF558XCY](https://www.encodeproject.org/files/ENCFF558XCY/) | [ENCFF990UBY](https://www.encodeproject.org/files/ENCFF990UBY/) |  |  |  | [ENCFF316MDQ](https://www.encodeproject.org/files/ENCFF316MDQ/) |
| [ASH1L](https://www.encodeproject.org/targets/ASH1L-human/) | [ENCFF761ADG](https://www.encodeproject.org/files/ENCFF761ADG/) |  |  |  |  |  |
| [ZSCAN29](https://www.encodeproject.org/targets/ZSCAN29-human/) | [ENCFF098RVJ](https://www.encodeproject.org/files/ENCFF098RVJ/) | [ENCFF987UCV](https://www.encodeproject.org/files/ENCFF987UCV/) |  |  |  |  |
| [NFATC3](https://www.encodeproject.org/targets/NFATC3-human/) | [ENCFF421LSY](https://www.encodeproject.org/files/ENCFF421LSY/) | [ENCFF375JDH](https://www.encodeproject.org/files/ENCFF375JDH/) |  |  |  |  |
| [SMAD1](https://www.encodeproject.org/targets/SMAD1-human/) | [ENCFF509WOE](https://www.encodeproject.org/files/ENCFF509WOE/) | [ENCFF204LRJ](https://www.encodeproject.org/files/ENCFF204LRJ/) |  |  |  |  |
| [ATF3](https://www.encodeproject.org/targets/ATF3-human/) | [ENCFF478OFO](https://www.encodeproject.org/files/ENCFF478OFO/) |  | [ENCFF000OXU](https://www.encodeproject.org/files/ENCFF000OXU/) |  |  |  |
| [NFIC](https://www.encodeproject.org/targets/NFIC-human/) | [ENCFF753LGT](https://www.encodeproject.org/files/ENCFF753LGT/) | [ENCFF617HLC](https://www.encodeproject.org/files/ENCFF617HLC/) |  |  |  | [ENCFF464YKH](https://www.encodeproject.org/files/ENCFF464YKH/) |
| [SOX6](https://www.encodeproject.org/targets/SOX6-human/) | [ENCFF849SWB](https://www.encodeproject.org/files/ENCFF849SWB/) |  |  |  |  | ENCFF475FUR |
| [ATF2](https://www.encodeproject.org/targets/ATF2-human/) | [ENCFF085AZW](https://www.encodeproject.org/files/ENCFF085AZW/) | [ENCFF780VWO](https://www.encodeproject.org/files/ENCFF780VWO/) |  |  |  | [ENCFF824TEZ](https://www.encodeproject.org/files/ENCFF824TEZ/) |
| [ATF7](https://www.encodeproject.org/targets/ATF7-human/) | [ENCFF838YGO](https://www.encodeproject.org/files/ENCFF838YGO/) |  |  |  | [ENCFF148ROD](https://www.encodeproject.org/files/ENCFF148ROD/) | [ENCFF608GXH](https://www.encodeproject.org/files/ENCFF608GXH/) |
| [TCF12](https://www.encodeproject.org/targets/TCF12-human/) | [ENCFF795XNL](https://www.encodeproject.org/files/ENCFF795XNL/) | [ENCFF455LNX](https://www.encodeproject.org/files/ENCFF455LNX/) |  |  | [ENCFF000QRG](https://www.encodeproject.org/files/ENCFF000QRG/) | ENCFF888NLH |
| [NR2C1](https://www.encodeproject.org/targets/NR2C1-human/) | [ENCFF965SIW](https://www.encodeproject.org/files/ENCFF965SIW/) | [ENCFF949DKV](https://www.encodeproject.org/files/ENCFF949DKV/) |  |  |  |  |
| [LEF1](https://www.encodeproject.org/targets/LEF1-human/) | [ENCFF890PMJ](https://www.encodeproject.org/files/ENCFF890PMJ/) |  |  |  |  |  |
| [ZNF24](https://www.encodeproject.org/targets/ZNF24-human/) | [ENCFF057NCM](https://www.encodeproject.org/files/ENCFF057NCM/) | [ENCFF431JBK](https://www.encodeproject.org/files/ENCFF431JBK/) |  |  | [ENCFF079WOP](https://www.encodeproject.org/files/ENCFF079WOP/) | [ENCFF806VEG](https://www.encodeproject.org/files/ENCFF806VEG/) |
| [GATAD2B](https://www.encodeproject.org/targets/GATAD2B-human/) | [ENCFF877LYM](https://www.encodeproject.org/files/ENCFF877LYM/) | [ENCFF699MBA](https://www.encodeproject.org/files/ENCFF699MBA/) |  |  | [ENCFF394QUX](https://www.encodeproject.org/files/ENCFF394QUX/) | ENCFF424XHT |
| [MNT](https://www.encodeproject.org/targets/MNT-human/) | [ENCFF510XHR](https://www.encodeproject.org/files/ENCFF510XHR/) |  |  |  | [ENCFF554XHJ](https://www.encodeproject.org/files/ENCFF554XHJ/) | [ENCFF370OOM](https://www.encodeproject.org/files/ENCFF370OOM/) |
| [ELF4](https://www.encodeproject.org/targets/ELF4-human/) | [ENCFF606YTH](https://www.encodeproject.org/files/ENCFF606YTH/) |  |  |  |  |  |
| [SKIL](https://www.encodeproject.org/targets/SKIL-human/) | [ENCFF010OCL](https://www.encodeproject.org/files/ENCFF010OCL/) | [ENCFF341WGX](https://www.encodeproject.org/files/ENCFF341WGX/) |  |  |  |  |
| [FOXM1](https://www.encodeproject.org/targets/FOXM1-human/) | [ENCFF866PHS](https://www.encodeproject.org/files/ENCFF866PHS/) | ENCFF766UTH |  |  | [ENCFF000QMN](https://www.encodeproject.org/files/ENCFF000QMN/) | ENCFF857EQG |
| [ZNF592](https://www.encodeproject.org/targets/ZNF592-human/) | [ENCFF411OFR](https://www.encodeproject.org/files/ENCFF411OFR/) | [ENCFF329ZGR](https://www.encodeproject.org/files/ENCFF329ZGR/) |  |  | [ENCFF517CCI](https://www.encodeproject.org/files/ENCFF517CCI/) |  |
| [MYBL2](https://www.encodeproject.org/targets/MYBL2-human/) | [ENCFF189FPT](https://www.encodeproject.org/files/ENCFF189FPT/) |  |  |  |  | [ENCFF362KFR](https://www.encodeproject.org/files/ENCFF362KFR/) |
| [EGR1](https://www.encodeproject.org/targets/EGR1-human/) | [ENCFF798EEI](https://www.encodeproject.org/files/ENCFF798EEI/) | [ENCFF436AVX](https://www.encodeproject.org/files/ENCFF436AVX/) | [ENCFF000OZA](https://www.encodeproject.org/files/ENCFF000OZA/) |  | [ENCFF000QLP](https://www.encodeproject.org/files/ENCFF000QLP/) |  |
| [BHLHE40](https://www.encodeproject.org/targets/BHLHE40-human/) | [ENCFF823NIQ](https://www.encodeproject.org/files/ENCFF823NIQ/) | [ENCFF431VZN](https://www.encodeproject.org/files/ENCFF431VZN/) |  | [ENCFF908WOK](https://www.encodeproject.org/files/ENCFF908WOK/) |  | [ENCFF547HWS](https://www.encodeproject.org/files/ENCFF547HWS/) |
| [BACH1](https://www.encodeproject.org/targets/BACH1-human/) | [ENCFF866OHV](https://www.encodeproject.org/files/ENCFF866OHV/) | [ENCFF209ASC](https://www.encodeproject.org/files/ENCFF209ASC/) |  |  |  |  |
| [JUND](https://www.encodeproject.org/targets/JUND-human/) | [ENCFF904GCT](https://www.encodeproject.org/files/ENCFF904GCT/) | [ENCFF028CUJ](https://www.encodeproject.org/files/ENCFF028CUJ/) | [ENCFF904LDR](https://www.encodeproject.org/files/ENCFF904LDR/) |  | [ENCFF722ZVE](https://www.encodeproject.org/files/ENCFF722ZVE/) | ENCFF776GGM |
| [RFX5](https://www.encodeproject.org/targets/RFX5-human/) | [ENCFF325VWA](https://www.encodeproject.org/files/ENCFF325VWA/) | [ENCFF276QQY](https://www.encodeproject.org/files/ENCFF276QQY/) |  |  | [ENCFF253MVW](https://www.encodeproject.org/files/ENCFF253MVW/) | [ENCFF212ITE](https://www.encodeproject.org/files/ENCFF212ITE/) |
| [MAFF](https://www.encodeproject.org/targets/MAFF-human/) | [ENCFF160TSK](https://www.encodeproject.org/files/ENCFF160TSK/) |  |  |  |  | [ENCFF848DMA](https://www.encodeproject.org/files/ENCFF848DMA/) |
| [MYC](https://www.encodeproject.org/targets/MYC-human/) | [ENCFF384WMI](https://www.encodeproject.org/files/ENCFF384WMI/) |  |  |  |  |  |
| [ZNF274](https://www.encodeproject.org/targets/ZNF274-human/) | [ENCFF826BOX](https://www.encodeproject.org/files/ENCFF826BOX/) |  | [ENCFF250XKA](https://www.encodeproject.org/files/ENCFF250XKA/) |  |  |  |
| [CEBPB](https://www.encodeproject.org/targets/CEBPB-human/) | [ENCFF059XPJ](https://www.encodeproject.org/files/ENCFF059XPJ/) | [ENCFF573GQJ](https://www.encodeproject.org/files/ENCFF573GQJ/) | [ENCFF000OYF](https://www.encodeproject.org/files/ENCFF000OYF/) | [ENCFF576ZHG](https://www.encodeproject.org/files/ENCFF576ZHG/) | [ENCFF000QLD](https://www.encodeproject.org/files/ENCFF000QLD/) | [ENCFF275GCD](https://www.encodeproject.org/files/ENCFF275GCD/) |
| [MXI1](https://www.encodeproject.org/targets/MXI1-human/) | [ENCFF976PFK](https://www.encodeproject.org/files/ENCFF976PFK/) | [ENCFF287GWT](https://www.encodeproject.org/files/ENCFF287GWT/) |  | [ENCFF670DTS](https://www.encodeproject.org/files/ENCFF670DTS/) |  | [ENCFF000XUV](https://www.encodeproject.org/files/ENCFF000XUV/) |
| [TBP](https://www.encodeproject.org/targets/TBP-human/) | [ENCFF495MQP](https://www.encodeproject.org/files/ENCFF495MQP/) | [ENCFF498BXQ](https://www.encodeproject.org/files/ENCFF498BXQ/) |  |  |  | [ENCFF082FBL](https://www.encodeproject.org/files/ENCFF082FBL/) |
| [CTCF](https://www.encodeproject.org/targets/CTCF-human/) | [ENCFF496SZR](https://www.encodeproject.org/files/ENCFF496SZR/) | [ENCFF584BRF](https://www.encodeproject.org/files/ENCFF584BRF/) | ENCFF172XLC | [ENCFF066FGA](https://www.encodeproject.org/files/ENCFF066FGA/) |  | [ENCFF249IWE](https://www.encodeproject.org/files/ENCFF249IWE/) |
| [USF2](https://www.encodeproject.org/targets/USF2-human/) | ENCFF112PAJ | [ENCFF078MCO](https://www.encodeproject.org/files/ENCFF078MCO/) |  | [ENCFF228QGC](https://www.encodeproject.org/files/ENCFF228QGC/) |  | [ENCFF283WWC](https://www.encodeproject.org/files/ENCFF283WWC/) |
| [ATF1](https://www.encodeproject.org/targets/ATF1-human/) | [ENCFF000YFF](https://www.encodeproject.org/files/ENCFF000YFF/) |  |  |  |  |  |
| [MAZ](https://www.encodeproject.org/targets/MAZ-human/) | [ENCFF524YGO](https://www.encodeproject.org/files/ENCFF524YGO/) | [ENCFF289UDS](https://www.encodeproject.org/files/ENCFF289UDS/) |  | [ENCFF865LAP](https://www.encodeproject.org/files/ENCFF865LAP/) | [ENCFF734GEN](https://www.encodeproject.org/files/ENCFF734GEN/) | [ENCFF693CAN](https://www.encodeproject.org/files/ENCFF693CAN/) |
| [MAFK](https://www.encodeproject.org/targets/MAFK-human/) | [ENCFF560QPO](https://www.encodeproject.org/files/ENCFF560QPO/) | [ENCFF950RDW](https://www.encodeproject.org/files/ENCFF950RDW/) |  | [ENCFF038LCM](https://www.encodeproject.org/files/ENCFF038LCM/) | [ENCFF086KKL](https://www.encodeproject.org/files/ENCFF086KKL/) | ENCFF251HGY |
| [MAX](https://www.encodeproject.org/targets/MAX-human/) | [ENCFF825FLR](https://www.encodeproject.org/files/ENCFF825FLR/) | [ENCFF386FSS](https://www.encodeproject.org/files/ENCFF386FSS/) | [ENCFF000PAC](https://www.encodeproject.org/files/ENCFF000PAC/) |  | [ENCFF000QOC](https://www.encodeproject.org/files/ENCFF000QOC/) | [ENCFF000PKO](https://www.encodeproject.org/files/ENCFF000PKO/) |
| [ZBTB7A](https://www.encodeproject.org/targets/ZBTB7A-human/) | [ENCFF920CCJ](https://www.encodeproject.org/files/ENCFF920CCJ/) |  |  |  |  | [ENCFF030JIY](https://www.encodeproject.org/files/ENCFF030JIY/) |
| [ETS1](https://www.encodeproject.org/targets/ETS1-human/) | [ENCFF006UXO](https://www.encodeproject.org/files/ENCFF006UXO/) | [ENCFF371ZBY](https://www.encodeproject.org/files/ENCFF371ZBY/) |  |  |  | [ENCFF172WFR](https://www.encodeproject.org/files/ENCFF172WFR/) |
| [FOSL1](https://www.encodeproject.org/targets/FOSL1-human/) | [ENCFF670JGI](https://www.encodeproject.org/files/ENCFF670JGI/) |  | [ENCFF000OZP](https://www.encodeproject.org/files/ENCFF000OZP/) |  |  |  |
| [SPI1](https://www.encodeproject.org/targets/SPI1-human/) | [ENCFF671SGF](https://www.encodeproject.org/files/ENCFF671SGF/) |  |  |  |  |  |
| [SIX5](https://www.encodeproject.org/targets/SIX5-human/) | [ENCFF000QFU](https://www.encodeproject.org/files/ENCFF000QFU/) | [ENCFF060XMV](https://www.encodeproject.org/files/ENCFF060XMV/) |  |  |  |  |
| [MEF2A](https://www.encodeproject.org/targets/MEF2A-human/) | [ENCFF700OGN](https://www.encodeproject.org/files/ENCFF700OGN/) |  |  |  |  |  |
| [TEAD4](https://www.encodeproject.org/targets/TEAD4-human/) | [ENCFF386SKS](https://www.encodeproject.org/files/ENCFF386SKS/) |  | [ENCFF000PCO](https://www.encodeproject.org/files/ENCFF000PCO/) |  | [ENCFF000QRO](https://www.encodeproject.org/files/ENCFF000QRO/) |  |
| [CREB1](https://www.encodeproject.org/targets/CREB1-human/) | [ENCFF000PXN](https://www.encodeproject.org/files/ENCFF000PXN/) | [ENCFF000NTW](https://www.encodeproject.org/files/ENCFF000NTW/) |  |  | [ENCFF130QXF](https://www.encodeproject.org/files/ENCFF130QXF/) | [ENCFF239CYG](https://www.encodeproject.org/files/ENCFF239CYG/) |
| [STAT5A](https://www.encodeproject.org/targets/STAT5A-human/) | [ENCFF711QEM](https://www.encodeproject.org/files/ENCFF711QEM/) | [ENCFF462CSN](https://www.encodeproject.org/files/ENCFF462CSN/) |  |  |  |  |
| [NR2F2](https://www.encodeproject.org/targets/NR2F2-human/) | [ENCFF717CDL](https://www.encodeproject.org/files/ENCFF717CDL/) |  |  |  |  | [ENCFF000PLQ](https://www.encodeproject.org/files/ENCFF000PLQ/) |
| [CUX1](https://www.encodeproject.org/targets/CUX1-human/) | [ENCFF377MEH](https://www.encodeproject.org/files/ENCFF377MEH/) | [ENCFF546JQP](https://www.encodeproject.org/files/ENCFF546JQP/) |  |  | [ENCFF853POP](https://www.encodeproject.org/files/ENCFF853POP/) |  |
| [ZNF384](https://www.encodeproject.org/targets/ZNF384-human/) | [ENCFF447POJ](https://www.encodeproject.org/files/ENCFF447POJ/) | [ENCFF463YMY](https://www.encodeproject.org/files/ENCFF463YMY/) |  |  |  | [ENCFF823OXL](https://www.encodeproject.org/files/ENCFF823OXL/) |
| [ELK1](https://www.encodeproject.org/targets/ELK1-human/) | [ENCFF526XKG](https://www.encodeproject.org/files/ENCFF526XKG/) | [ENCFF551AQK](https://www.encodeproject.org/files/ENCFF551AQK/) |  |  | [ENCFF054VLG](https://www.encodeproject.org/files/ENCFF054VLG/) |  |
| [JUN](https://www.encodeproject.org/targets/JUN-human/) | [ENCFF738IAS](https://www.encodeproject.org/files/ENCFF738IAS/) | [ENCFF720HIA](https://www.encodeproject.org/files/ENCFF720HIA/) |  |  | [ENCFF931IXW](https://www.encodeproject.org/files/ENCFF931IXW/) | [ENCFF893JTS](https://www.encodeproject.org/files/ENCFF893JTS/) |
| [SETDB1](https://www.encodeproject.org/targets/SETDB1-human/) | [ENCFF693CKU](https://www.encodeproject.org/files/ENCFF693CKU/) |  |  |  |  |  |

**Supplementary Table S5: Description of the Mean Squared Error (MSE) evaluation criterion.**

| Abbreviation | Description |
| --- | --- |
| mseGlobal | The genome-wide mean MSE |
| mseGene | The mean MSE in protein coding genes |
| mseProm | The mean MSE in promoter regions |
| mseEnh | The mean MSE in enhancer regions |
| mseObs | The MSE of the top 1% of genomic positions ranked by experimental signal |
| mseImp | The MSE of the top 1% of genomic positions ranked by predicted signal |

**Supplementary Table S6: Evaluation results of functional element prediction.**

| Cell Type | Indicator | Promoter | Insulator | Poly(A) | Gene Body |
| --- | --- | --- | --- | --- | --- |
| K562 | Accuracy | 0.90 | 0.77 | 0.70 | 0.91 |
| K562 | Precision | 0.87 | 0.89 | 0.85 | 0.83 |
| K562 | Recall | 0.93 | 0.72 | 0.66 | 0.98 |
| K562 | F-score | 0.90 | 0.79 | 0.74 | 0.90 |
| GM12878 | Accuracy | 0.88 | 0.64 | 0.68 | 0.92 |
| GM12878 | Precision | 0.82 | 0.61 | 0.77 | 0.92 |
| GM12878 | Recall | 0.94 | 0.65 | 0.65 | 0.93 |
| GM12878 | F-score | 0.88 | 0.63 | 0.71 | 0.92 |
| HCT116 | Accuracy | 0.92 |  | 0.69 | 0.93 |
| HCT116 | Precision | 0.88 |  | 0.82 | 0.93 |
| HCT116 | Recall | 0.96 |  | 0.65 | 0.93 |
| HCT116 | F-score | 0.92 |  | 0.73 | 0.93 |
| HeLa | Accuracy | 0.84 |  | 0.65 | 0.95 |
| HeLa | Precision | 0.70 |  | 0.66 | 0.92 |
| HeLa | Recall | 0.99 |  | 0.65 | 0.99 |
| HeLa | F-score | 0.82 |  | 0.65 | 0.95 |
| CD4+ T cell | Accuracy | 0.88 |  | 0.64 | 0.95 |
| CD4+ T cell | Precision | 0.78 |  | 0.53 | 0.93 |
| CD4+ T cell | Recall | 0.98 |  | 0.68 | 0.98 |
| CD4+ T cell | F-score | 0.87 |  | 0.60 | 0.95 |
| IMR-90 | Accuracy | 0.91 |  | 0.77 | 0.95 |
| IMR-90 | Precision | 0.84 |  | 0.89 | 0.93 |
| IMR-90 | Recall | 0.97 |  | 0.72 | 0.98 |
| IMR-90 | F-score | 0.90 |  | 0.79 | 0.95 |
| MCF-7 | Accuracy | 0.90 |  | 0.69 | 0.94 |
| MCF-7 | Precision | 0.86 |  | 0.80 | 0.92 |
| MCF-7 | Recall | 0.94 |  | 0.65 | 0.95 |
| MCF-7 | F-score | 0.90 |  | 0.72 | 0.93 |
| HepG2 | Accuracy | 0.65 | 0.62 | 0.68 | 0.90 |
| HepG2 | Precision | 0.57 | 0.56 | 0.78 | 0.89 |
| HepG2 | Recall | 0.69 | 0.63 | 0.65 | 0.91 |
| HepG2 | F-score | 0.62 | 0.59 | 0.71 | 0.90 |
| Liver (Mouse) | Accuracy | 0.66 |  | 0.48 | 0.72 |
| Liver (Mouse) | Precision | 0.34 |  | 0.37 | 0.74 |
| Liver (Mouse) | Recall | 0.96 |  | 0.47 | 0.71 |
| Liver (Mouse) | F-score | 0.50 |  | 0.42 | 0.73 |

**Supplementary Table S7: TFBS grouping based on prediction difficulty.** Transcription factors are categorized into Easy, Moderate, and Difficult groups, corresponding to three model branches during training.

| Easy | ARNT, ASH1L, ATF1, ATF7, BHLHE40, CREB1, CREM, CUX1, E2F8, E4F1, ELF1, ELF4, ESRRA, ETS1, ETV6, FOSL1, FOXA1, FOXK2, FOXM1, GATAD2B, HES1, IKZF1, JUN, JUNB, JUND, LEF1, MAX, MAZ, MBD2, MEF2A, MNT, MXI1, MYBL2, MYC, NEUROD1, NFATC3, NFIC, NFXL1, NKRF, NR2C1, NR2F1, NR2F2, NR2F6, NRF1, POU5F1, RFX5, RUNX1, SETDB1, SIX5, SKIL, SMAD1, SMAD5, SOX6, SP1, SREBF1, STAT5A, TBP, TCF7, TCF7L2, TCF12, TEAD4, USF2, ZBED1, ZBTB7A, ZBTB11, ZBTB40, ZNF24, ZNF274, ZNF282, ZNF407, ZNF592, ZSCAN29, ZZZ3 |
| --- | --- |
| Moderate | ATF3, BACH1, CEBPB, CEBPZ, CTCF, MAFF, REST, ZBTB33 |
| Difficult | RFX1, SPI1, ZKSCAN1, PKNOX1, ATF2, EGR1, MAFK, ZNF384, ELK1 |

**Supplementary Table S8: Summary of downstream tasks.**

| **Downstream Task** | **Task type** | **Evaluation index** | **Input** | **Output** | **Data Source** | **Post Processing** |
| --- | --- | --- | --- | --- | --- | --- |
| Histone Modification | Regression | Pearson Correlation,  Spearman, Correlation,  ROC curves,  PR curves,  MSE | DNA Sequence  (196608, 4)  RO-seq (196608, 3) | Histone Modification  (896, 10) | ENCODE:  (Supplementary Tabel S1 and S2) |  |
| Functional Element | Classification | Accuracy,  Precision,  Recall,  F-score,  ROC curves,  PR curves | DNA Sequence  (196608, 4)  RO-seq (196608, 3) | Output1: promoter and gene body  (896, 2)  Output2: insulator and Poly(A) | Promoter: 10.1038/s41588-022-01026-x  Gene Body and Poly (A)：  GCF_000001405.25，GCF_000001635.20  Insulator：  10.1038/nbt.1662 | Peak Calling |
| Gene Expression | Regression | Pearson Correlation,  Spearman, Correlation,  ROC curves,  PR curves | DNA Sequence  (196608, 4)  RO-seq (196608, 3) | RNA-seq (896， 1) | NCBI：  Supplementary Tabel S3 |  |
| TFBS | Regression/ Classification | Pearson Correlation,  PR curves,  Precision at 5% Recall | DNA Sequence  (196608, 4)  RO-seq (196608, 3) | Output simple:  (896, 83)  Output moderate:  (896, 8)  Output difficult:  (896, 9) | ENCODE:  (Supplementary Tabel S4) | Classification: threshold: Threshold-based Classification |

**Supplement Text**

**Supplementary Text S1: Division of Promoters and Enhancers**

The functional element labels used in the evaluation are consistent with those in the downstream prediction task. The difference is that we further subdivided the peaks identified by dREG. Specifically, peaks located within ±2 kb of the transcription start site (TSS) were classified as promoters, while the remaining peaks were designated as enhancers.

**Supplementary Text S2: Gene Expression Quantification Based on RO-seq Signals**

In this study, RO-seq was employed to assess gene transcriptional activity. Gene annotations were retrieved from the NCBI reference annotation files GCF_000001405.25 (human, hg19) and GCF_000001635.20 (mouse, mm10). RO-seq sites with non-zero signal values were marked as expressed, and the proportion of expressed sites within each gene was then calculated. The results are presented in Supplementary Figure S11. The figure clearly depicts the distribution of expressed genes (mean ≈ 1) and non-expressed genes (mean ≈ 0). A threshold of 0.4 was set, corresponding to the upper bound of the non-expressed gene distribution, to determine gene expression status. This threshold is relatively flexible; a value of 0.4 was chosen to allow the inclusion of a greater number of expressed genes.

**Supplementary Text S3: Construction of Continuous Signal Representations for Functional Elements.**

We converted the functional element labels into continuous signal values using the following steps: First, cell line-specific label files for functional elements were transformed into peak-shaped continuous signals, with a maximum value of 5 and a minimum of 0.5. The signal increased from both ends toward the center of the peak, with a fixed increment between adjacent points. As a result, shorter labels produced steeper peak shapes. The choice of a maximum value of 5 and a minimum of 0.5 was intended to ensure sufficient contrast with background noise while maintaining sharp peak gradients. For gene body labels, which span relatively large genomic regions, the signal increments were applied every 100 bp. For shorter functional elements, such as promoters and enhancers, the interval was set to 1 bp. Next, Gaussian noise with a variance of 0.1 was added to background (non-peak) regions to reduce the risk of model overfitting. In these non-peak regions, signal values were assigned at 100 bp intervals. Finally, we merged the generated peak signals and background noise to construct the ground truth signal used for model training.

**Supplementary Text S4: Statistical peak calling procedure for functional element identification**

We apply statistical methods to perform peak calling on the prediction results, identifying the locations of functional elements.

1. Use the predicted promoter signal as a baseline, as it tends to be more accurate and exhibits a clearer distinction between peak and background noise compared to gene body predictions.
2. Meaningless regions are identified as continuous segments longer than 100 bp where the rate of change between adjacent values is less than 0.1.
3. The mean is computed as the average of the predicted values. The covariance matrix is estimated using a subset of five predicted values, following the method used in dHIT, and is computed via the *numpy.cov()* function.
4. The segmentation threshold is determined using the mean and standard deviation of the predicted values, specifically set at the 99th percentile (right tail) of the distribution.
5. Use the threshold to segment the predicted signal into multiple peaks.
6. Smooth the predicted gene body signals and apply a valley-based segmentation approach using *scipy.signal.find_peaks*, setting the valley prominence threshold to 0.8.
7. Determine whether a peak is noise based on a p-value threshold: if the p-value is less than 1e-3, the null hypothesis (that the peak is noise) is rejected.
8. Evaluate classification performance by calculating the confusion matrix.
9. If a peak overlaps with more than 60% of a label region, it is considered a true positive (TP). The 0.6 threshold is used to exclude cases where a label intersects with two peaks. A label can only match one peak, but a peak may cover multiple labels. However, peaks like promoters are relatively short, so this situation is rare. Gene body is also divided multiple times, and since loss is not directly correlated with accuracy, the model does not tend to favor training on longer peaks. This helps avoid the issue where an exceptionally long peak artificially inflates the true positive count.
