# Supplementary material for: An end-to-end generalizable deep learning framework to comprehensively analyze transcriptional regulation
Source: Research Square preprint supplement (doi:10.21203/rs.3.rs-7242733/v1), 2025-08-18
Supplement: Supplementary file 2 [file 75c06e6b5568a980ef92cd6c.xlsx]

## Sheet: TFBS
Cell Type	TFBS	AUPR 200 bp	AUPR 1k bp	Precision at 5% Recall 200 bp	Precision at 5% Recall 1k bp	Prearson 200 bp	Pearson 1k bp
K562	TCF7	0.424706	0.486882	0.875	0.926829	0.521037	0.620302
K562	NRF1	0.596867	0.651775	0.966667	0.978261	0.668295	0.796578
K562	JUNB	0.187472	0.222266	0.377358	0.631579	0.308635	0.35651
K562	NR2F6	0.37354	0.445474	0.855721	0.888889	0.485168	0.569696
K562	RUNX1	0.32465	0.399482	0.771186	0.923077	0.439091	0.539085
K562	ZBTB11	0.297917	0.352073	0.833333	1	0.456302	0.540733
K562	ZBED1	0.43443	0.506841	0.910448	1	0.53731	0.633447
K562	MBD2	0.630857	0.679306	1	1	0.697387	0.79153
K562	CREM	0.597053	0.64502	0.994872	1	0.684197	0.790855
K562	ETV6	0.282428	0.332417	0.634146	0.9375	0.421967	0.478117
K562	SMAD5	0.694359	0.727057	1	1	0.745771	0.842686
K562	SP1	0.651451	0.696919	0.987013	1	0.687632	0.767894
K562	NR2F1	0.352418	0.414321	0.782383	0.829268	0.464811	0.55706
K562	RFX1	0.373441	0.435362	0.941748	0.956522	0.463154	0.50673
K562	IKZF1	0.436066	0.501231	0.868852	0.90566	0.531385	0.635069
K562	TCF7L2	0.112432	0.153032	0.241935	0.346154	0.255506	0.332406
K562	ZKSCAN1	0.16778	0.230972	0.490196	0.683333	0.282487	0.375259
K562	ZBTB33	0.350029	0.417075	0.731544	0.79845	0.467325	0.5448
K562	FOXA1	0.0845599	0.103887	0.173333	0.176471	0.21035	0.255263
K562	SREBF1	0.28158	0.345025	0.674419	0.8	0.415339	0.50238
K562	ZZZ3	0.369599	0.417813	0.707865	0.722222	0.490308	0.56353
K562	CEBPZ	0.158578	0.194871	0.6	0.666667	0.237119	0.324898
K562	ELF1	0.492092	0.548264	0.907216	0.95	0.569126	0.645559
K562	ESRRA	0.507459	0.56084	0.951872	0.988095	0.583829	0.682527
K562	NKRF	0.398869	0.463555	0.761194	0.821429	0.515682	0.605513
K562	FOXK2	0.407835	0.475908	0.814433	0.902439	0.529352	0.618908
K562	ZBTB40	0.555673	0.62761	0.945274	0.9625	0.607726	0.71582
K562	REST	0.534283	0.590512	0.96748	0.965217	0.606583	0.676044
K562	PKNOX1	0.464522	0.526516	0.927126	0.954128	0.54027	0.625972
K562	HES1	0.295754	0.339494	0.666667	0.675676	0.436285	0.50668
K562	NFXL1	0.138895	0.169584	0.373832	0.413043	0.284396	0.336014
K562	ZNF407	0.112651	0.13472	0.21	0.2	0.252379	0.310611
K562	NEUROD1	0.555545	0.622605	0.911504	0.933333	0.633919	0.726689
K562	E2F8	0.489414	0.564129	0.94382	0.973684	0.575557	0.657776
K562	POU5F1	0.261193	0.309792	0.571429	1	0.373636	0.433977
K562	ZNF282	0.465437	0.522756	0.938776	0.95122	0.553986	0.63603
K562	E4F1	0.540183	0.60046	1	1	0.621756	0.700711
K562	ARNT	0.281485	0.320469	0.701754	0.678571	0.421188	0.488707
K562	ASH1L	0.246357	0.303183	0.711538	0.809524	0.394184	0.475202
K562	ZSCAN29	0.216482	0.246379	0.435897	0.428571	0.356229	0.436895
K562	NFATC3	0.402591	0.460885	0.79798	0.878049	0.516436	0.603597
K562	SMAD1	0.497299	0.554011	0.977778	0.961538	0.581425	0.701104
K562	ATF3	0.560317	0.613194	0.985646	1	0.619259	0.670395
K562	NFIC	0.430611	0.486971	0.94306	0.975207	0.529711	0.639838
K562	SOX6	0.580596	0.62598	0.971014	0.977778	0.638603	0.723562
K562	ATF2	0.472857	0.509072	0.934211	1	0.546925	0.589144
K562	ATF7	0.623684	0.66401	1	1	0.666833	0.750485
K562	TCF12	0.387144	0.428636	0.908333	0.898305	0.489704	0.562149
K562	NR2C1	0.347591	0.414858	0.778947	0.916667	0.472895	0.544794
K562	LEF1	0.299714	0.342513	0.640449	0.757576	0.442927	0.516951
K562	ZNF24	0.339643	0.406014	0.741294	0.814815	0.469072	0.55827
K562	GATAD2B	0.599694	0.6517	0.939759	0.958904	0.648062	0.740498
K562	MNT	0.572417	0.622198	0.98	1	0.640228	0.736698
K562	ELF4	0.527739	0.58392	0.967742	0.935484	0.615618	0.693431
K562	SKIL	0.619924	0.661073	0.984848	1	0.65885	0.740635
K562	FOXM1	0.360501	0.407748	0.708333	0.806452	0.489177	0.554372
K562	ZNF592	0.596587	0.666341	0.932432	0.954545	0.636263	0.727944
K562	MYBL2	0.357577	0.421799	0.727273	0.884615	0.477138	0.571027
K562	EGR1	0.355713	0.420916	0.740113	0.875	0.452294	0.568677
K562	BHLHE40	0.455981	0.527026	0.896774	0.948718	0.551476	0.663751
K562	BACH1	0.307547	0.356234	1	1	0.406112	0.472551
K562	JUND	0.584003	0.644059	0.978571	1	0.65851	0.73812
K562	RFX5	0.166776	0.201642	0.472222	0.47619	0.297507	0.432452
K562	MAFF	0.379936	0.426931	0.895833	0.931034	0.522372	0.569779
K562	MYC	0.609436	0.655663	0.97619	0.984127	0.659031	0.780588
K562	ZNF274	0.120078	0.128406	0.434783	0.333333	0.27028	0.316233
K562	CEBPB	0.477905	0.544407	0.91954	0.941176	0.61717	0.692491
K562	MXI1	0.436788	0.530059	0.9	0.952381	0.542264	0.665871
K562	TBP	0.692229	0.731569	0.988764	1	0.743946	0.844946
K562	CTCF	0.523983	0.576739	0.992958	1	0.634636	0.691199
K562	USF2	0.335631	0.383335	0.762712	0.77193	0.480177	0.581145
K562	ATF1	0.501648	0.548915	0.898551	0.902439	0.614309	0.688946
K562	MAZ	0.65067	0.710422	0.958333	1	0.699685	0.798119
K562	MAFK	0.404104	0.464331	0.878261	0.95082	0.507049	0.576439
K562	MAX	0.557114	0.603182	1	1	0.650326	0.788745
K562	ZBTB7A	0.592807	0.61795	0.944	0.975	0.689334	0.830628
K562	ETS1	0.55195	0.619913	1	1	0.62932	0.745158
K562	FOSL1	0.364936	0.41585	0.830189	0.9	0.481642	0.535579
K562	SPI1	0.458044	0.523317	0.934641	0.957447	0.383253	0.468164
K562	SIX5	0.255887	0.310784	0.5625	0.636364	0.424274	0.529522
K562	MEF2A	0.23461	0.27386	0.583333	0.594595	0.351807	0.430371
K562	TEAD4	0.439796	0.506567	0.881119	0.916667	0.544376	0.643229
K562	CREB1	0.570238	0.620689	0.933333	1	0.641994	0.745098
K562	STAT5A	0.289513	0.336617	0.777778	0.793103	0.424228	0.48448
K562	NR2F2	0.411194	0.482584	0.901316	0.924051	0.518745	0.621649
K562	CUX1	0.26783	0.308776	0.712121	0.722222	0.389315	0.481158
K562	ZNF384	0.272602	0.321672	0.735849	0.779661	0.412243	0.493522
K562	ELK1	0.257959	0.300429	0.6875	0.636364	0.362214	0.478967
K562	JUN	0.52995	0.585516	0.92562	0.924242	0.573956	0.630636
K562	SETDB1	0.232212	0.269974	0.734375	0.787879	0.579871	0.634409
GM12878	TCF7	0.305562	0.376708	0.789709	0.853778	0.424058	0.529563
GM12878	NRF1	0.476841	0.559191	0.774828	0.816697	0.519621	0.639238
GM12878	JUNB	0.145688	0.201502	0.44892	0.540937	0.224196	0.283474
GM12878	ZBED1	0.414501	0.480266	0.911483	0.953379	0.497255	0.612559
GM12878	CREM	0.481189	0.540275	0.966085	0.983804	0.553396	0.685554
GM12878	SMAD5	0.580991	0.672806	0.915954	0.953058	0.524371	0.669779
GM12878	SP1	0.483084	0.560582	0.973611	0.990783	0.571271	0.693584
GM12878	NR2F1	0.316775	0.389144	0.700875	0.760921	0.436734	0.552392
GM12878	IKZF1	0.433653	0.501014	0.85855	0.896298	0.524516	0.634208
GM12878	ZBTB33	0.0228469	0.038873	0.035708	0.054311	0.0827441	0.126005
GM12878	ZZZ3	0.0249516	0.0352243	0.075093	0.115152	0.102738	0.148383
GM12878	CEBPZ	0.222743	0.251777	0.825641	0.851852	0.38447	0.507306
GM12878	ELF1	0.485106	0.544146	0.963904	0.975876	0.559403	0.667943
GM12878	ESRRA	0.280349	0.348473	0.608814	0.687003	0.340295	0.46033
GM12878	NKRF	0.506269	0.587803	0.868479	0.915429	0.560099	0.697874
GM12878	FOXK2	0.433321	0.48004	0.90348	0.91538	0.54169	0.639594
GM12878	ZBTB40	0.344652	0.396864	0.844081	0.886869	0.382737	0.494174
GM12878	REST	0.0983457	0.141327	0.182136	0.226605	0.229391	0.354529
GM12878	PKNOX1	0.336825	0.389861	0.843399	0.879334	0.422286	0.515456
GM12878	NFXL1	0.0573889	0.0900327	0.111429	0.15847	0.162846	0.234714
GM12878	E2F8	0.378242	0.430879	0.848792	0.892222	0.469909	0.5602
GM12878	E4F1	0.289839	0.331932	0.651355	0.641827	0.336227	0.40726
GM12878	ARNT	0.356948	0.414109	0.761994	0.801422	0.431532	0.524561
GM12878	ZSCAN29	0.18019	0.243144	0.463812	0.56701	0.312569	0.423547
GM12878	NFATC3	0.316119	0.373885	0.788675	0.841723	0.438712	0.524817
GM12878	SMAD1	0.272302	0.338396	0.646707	0.707143	0.393658	0.484582
GM12878	NFIC	0.26779	0.349764	0.68703	0.801949	0.379636	0.486507
GM12878	ATF2	0.311885	0.348102	0.777971	0.818921	0.436825	0.48153
GM12878	TCF12	0.161977	0.244659	0.398925	0.513161	0.291193	0.429938
GM12878	NR2C1	0.356671	0.419374	0.853043	0.885593	0.467114	0.581446
GM12878	ZNF24	0.275584	0.352516	0.663797	0.748499	0.399144	0.510059
GM12878	GATAD2B	0.517763	0.563764	0.916628	0.938084	0.595445	0.70429
GM12878	SKIL	0.282444	0.369221	0.598306	0.718615	0.403783	0.492352
GM12878	FOXM1	0.399236	0.477678	0.809842	0.863023	0.475758	0.608068
GM12878	ZNF592	0.266429	0.338559	0.558718	0.625363	0.376845	0.480927
GM12878	EGR1	0.236477	0.316278	0.624165	0.748732	0.36572	0.550386
GM12878	BHLHE40	0.436225	0.480452	0.949121	0.960784	0.539902	0.672025
GM12878	BACH1	0.135132	0.184674	0.257314	0.310168	0.152736	0.211513
GM12878	JUND	0.186141	0.231434	0.578206	0.636519	0.294547	0.366666
GM12878	RFX5	0.222371	0.277936	0.459119	0.53453	0.360597	0.445169
GM12878	CEBPB	0.0885279	0.126152	0.173623	0.245996	0.522135	0.609562
GM12878	MXI1	0.514172	0.565042	0.963048	0.982561	0.574694	0.725873
GM12878	TBP	0.573536	0.630682	0.987768	0.992545	0.639154	0.752718
GM12878	CTCF	0.57553	0.623661	0.987299	0.991542	0.670027	0.724744
GM12878	USF2	0.200834	0.281335	0.416883	0.514085	0.337975	0.470875
GM12878	MAZ	0.628891	0.670867	0.983154	0.993307	0.698295	0.812952
GM12878	MAFK	0.204679	0.237737	0.506361	0.536105	0.341362	0.413679
GM12878	MAX	0.559149	0.628235	0.956832	0.982864	0.588883	0.734523
GM12878	ETS1	0.493557	0.577942	0.874688	0.933916	0.566075	0.716614
GM12878	SIX5	0.273391	0.317131	0.853864	0.904571	0.437776	0.580385
GM12878	CREB1	0.549508	0.591995	0.995085	0.998322	0.638514	0.766155
GM12878	STAT5A	0.296636	0.372165	0.595145	0.657648	0.366301	0.489227
GM12878	CUX1	0.0696416	0.0966257	0.182299	0.234375	0.18916	0.260995
GM12878	ZNF384	0.242759	0.2905	0.72067	0.774855	0.383124	0.465343
GM12878	ELK1	0.385425	0.454	0.896341	0.935424	0.478466	0.57157
HCT116	SP1	0.566544	0.633985	0.988813	0.997143	0.583292	0.6887
HCT116	ELF1	0.613293	0.683415	0.988604	0.995487	0.656222	0.77838
HCT116	REST	0.0655789	0.098574	0.137124	0.1734	0.178355	0.247867
HCT116	ATF3	0.32458	0.392497	0.844146	0.907328	0.420931	0.540856
HCT116	EGR1	0.487876	0.557757	0.924073	0.957924	0.555029	0.699405
HCT116	JUND	0.617444	0.668963	0.984774	0.991078	0.663077	0.775488
HCT116	CEBPB	0.188789	0.233948	0.433762	0.511315	0.534751	0.620318
HCT116	CTCF	0.519681	0.578466	0.993541	0.995198	0.584014	0.677578
HCT116	MAX	0.686423	0.731576	0.996033	0.999191	0.717937	0.827293
HCT116	FOSL1	0.540708	0.59584	0.953203	0.970485	0.48624	0.638646
HCT116	TEAD4	0.407717	0.49351	0.791068	0.860215	0.522586	0.642968
IMR-90	BHLHE40	0.333842	0.416637	0.798456	0.879179	0.456866	0.574643
IMR-90	CEBPB	0.461468	0.541687	0.936563	0.956206	0.531971	0.618147
IMR-90	MXI1	0.385159	0.476946	0.7984	0.889647	0.475713	0.640079
IMR-90	CTCF	0.568128	0.613962	0.992492	0.994965	0.670071	0.717537
IMR-90	USF2	0.263743	0.346028	0.711385	0.820752	0.40079	0.544987
IMR-90	MAZ	0.390986	0.463404	0.79134	0.849736	0.507533	0.637723
IMR-90	MAFK	0.33632	0.393099	0.807874	0.852183	0.459803	0.512556
MCF-7	NRF1	0.405447	0.469978	0.755278	0.799642	0.508586	0.581597
MCF-7	ZBTB11	0.291269	0.349202	0.694722	0.72679	0.439128	0.528761
MCF-7	MBD2	0.226287	0.274756	0.653326	0.720244	0.351242	0.433584
MCF-7	SP1	0.0526971	0.0640713	0.164373	0.158805	0.160192	0.190989
MCF-7	RFX1	0.306769	0.354099	0.840849	0.86454	0.426569	0.50313
MCF-7	TCF7L2	0.0555011	0.0784446	0.15594	0.206177	0.124986	0.160955
MCF-7	ZKSCAN1	0.0225726	0.0388155	0.10032	0.143225	0.0862013	0.13025
MCF-7	ZBTB33	0.00678307	0.0100427	0.015752	0.019661	0.052869	0.069658
MCF-7	FOXA1	0.0504563	0.0785035	0.169541	0.231412	0.10343	0.138731
MCF-7	SREBF1	0.1074	0.131558	0.352463	0.388831	0.242497	0.313582
MCF-7	ELF1	0.475745	0.538992	0.958554	0.976348	0.566088	0.667953
MCF-7	ESRRA	0.136084	0.173611	0.398226	0.469982	0.268632	0.337555
MCF-7	FOXK2	0.0183471	0.0237139	0.061959	0.074834	0.0989951	0.120892
MCF-7	ZBTB40	0.233755	0.266514	0.815292	0.84991	0.314582	0.400996
MCF-7	REST	0.0357523	0.0572091	0.083766	0.107124	0.126874	0.169896
MCF-7	PKNOX1	0.312685	0.3543	0.858542	0.885211	0.433886	0.508597
MCF-7	HES1	0.0218934	0.0310193	0.088964	0.111702	0.0981726	0.118554
MCF-7	NFXL1	0.00626628	0.00984119	0.021181	0.026119	0.0561244	0.0792917
MCF-7	E2F8	0.111867	0.13565	0.320724	0.374468	0.224945	0.271101
MCF-7	E4F1	0.0922388	0.115747	0.378961	0.393855	0.183842	0.218439
MCF-7	ATF7	0.0712405	0.0915697	0.218241	0.262148	0.172472	0.195245
MCF-7	TCF12	0.13046	0.178729	0.340893	0.410751	0.267008	0.353387
MCF-7	ZNF24	0.168817	0.216087	0.461117	0.51741	0.305304	0.391794
MCF-7	GATAD2B	0.0702227	0.0995671	0.191737	0.240604	0.187409	0.237129
MCF-7	FOXM1	0.0910095	0.123262	0.237921	0.293474	0.214799	0.260686
MCF-7	ZNF592	0.0782621	0.103945	0.250211	0.299238	0.187956	0.238579
MCF-7	EGR1	0.166121	0.218811	0.358233	0.449941	0.296771	0.390827
MCF-7	JUND	0.271101	0.332224	0.688427	0.774601	0.398727	0.508764
MCF-7	RFX5	0.199451	0.239448	0.532605	0.586522	0.277506	0.356145
MCF-7	CEBPB	0.219018	0.258477	0.70292	0.764157	0.223815	0.253222
MCF-7	MAZ	0.54505	0.605112	0.913057	0.933976	0.61295	0.73486
MCF-7	MAFK	0.236398	0.275669	0.644911	0.696607	0.37213	0.413288
MCF-7	MAX	0.514237	0.541721	0.989856	0.995896	0.614939	0.749434
MCF-7	TEAD4	0.181634	0.240315	0.527477	0.620559	0.320274	0.41311
MCF-7	CREB1	0.318536	0.359414	0.926852	0.951178	0.426691	0.530959
MCF-7	CUX1	0.151814	0.187192	0.434618	0.483882	0.280787	0.36733
MCF-7	ELK1	0.389793	0.451995	0.899033	0.915723	0.343192	0.448864
MCF-7	JUN	0.105368	0.129691	0.356869	0.447525	0.574101	0.616466
HepG2	TCF7	0.0476793	0.0791145	0.131009	0.188776	0.142569	0.221744
HepG2	NRF1	0.243957	0.315561	0.551286	0.634703	0.382619	0.501264
HepG2	NR2F6	0.150543	0.219434	0.432197	0.562235	0.271817	0.378579
HepG2	CREM	0.293685	0.356329	0.808191	0.87882	0.379224	0.516107
HepG2	SP1	0.279674	0.356307	0.823785	0.898313	0.399086	0.513404
HepG2	RFX1	0.273358	0.30494	0.78691	0.804035	0.270675	0.300687
HepG2	IKZF1	0.000570046	0.00102257	0.001427	0.002353	0.0135686	0.0164138
HepG2	TCF7L2	0.221554	0.298968	0.617972	0.750109	0.335389	0.456857
HepG2	ZKSCAN1	0.0619675	0.0951733	0.229714	0.304894	0.164622	0.244831
HepG2	ZBTB33	0.101978	0.170429	0.160302	0.225946	0.197558	0.281876
HepG2	FOXA1	0.0137814	0.0234442	0.042692	0.066517	0.0721029	0.113155
HepG2	ELF1	0.222896	0.298574	0.633864	0.727602	0.358436	0.482886
HepG2	FOXK2	0.0724954	0.103941	0.221706	0.284638	0.181551	0.249998
HepG2	ZBTB40	0.123153	0.220746	0.389384	0.544345	0.186217	0.27784
HepG2	REST	0.158497	0.205178	0.320861	0.368047	0.311094	0.434195
HepG2	ZNF282	0.00122472	0.00251966	0.004694	0.008248	0.0159881	0.0237884
HepG2	ARNT	0.0012933	0.00232468	0.005812	0.00869	0.0192494	0.0255802
HepG2	NFIC	0.260943	0.334714	0.683923	0.79267	0.317045	0.432384
HepG2	SOX6	0.264966	0.327863	0.744535	0.813096	0.3728	0.467965
HepG2	ATF2	0.328586	0.359236	0.788364	0.812121	0.454791	0.46687
HepG2	ATF7	0.0658715	0.0903341	0.241132	0.296664	0.160705	0.18645
HepG2	TCF12	0.0754079	0.134402	0.213621	0.3236	0.17355	0.267402
HepG2	ZNF24	0.0986722	0.142578	0.286069	0.385122	0.222106	0.295716
HepG2	GATAD2B	0.226026	0.299488	0.542968	0.643024	0.347748	0.458018
HepG2	MNT	0.225447	0.310687	0.552971	0.651786	0.312304	0.429784
HepG2	FOXM1	0.0406209	0.0858394	0.099351	0.189419	0.133104	0.241466
HepG2	MYBL2	0.227816	0.298317	0.582481	0.685697	0.363752	0.487717
HepG2	BHLHE40	0.230866	0.307581	0.573555	0.671395	0.357507	0.483829
HepG2	JUND	0.248058	0.320826	0.653233	0.726829	0.377219	0.519263
HepG2	RFX5	0.108958	0.170954	0.360311	0.518728	0.234009	0.347981
HepG2	MAFF	0.230871	0.295783	0.693216	0.762673	0.36733	0.400349
HepG2	CEBPB	0.248177	0.298807	0.695171	0.751009	0.19886	0.233666
HepG2	MXI1	0.211841	0.30058	0.489265	0.609684	0.329816	0.459648
HepG2	TBP	0.374322	0.477537	0.79956	0.875	0.402636	0.557056
HepG2	CTCF	0.446165	0.523616	0.951422	0.970071	0.574928	0.632179
HepG2	USF2	0.139187	0.182157	0.378949	0.44898	0.283132	0.364218
HepG2	MAZ	0.399888	0.495889	0.747057	0.83223	0.485974	0.639533
HepG2	MAFK	0.212	0.281377	0.621554	0.695244	0.327137	0.358546
HepG2	MAX	0.386525	0.431281	0.905805	0.933844	0.504393	0.649169
HepG2	ZBTB7A	0.211221	0.297264	0.522127	0.676764	0.3339	0.514241
HepG2	ETS1	0.073571	0.124769	0.209693	0.302219	0.173827	0.267988
HepG2	CREB1	0.16396	0.197613	0.749771	0.809664	0.29541	0.379478
HepG2	NR2F2	0.210771	0.291559	0.587959	0.690857	0.32412	0.431576
HepG2	ZNF384	0.156948	0.202928	0.458643	0.5201	0.281508	0.350076
HepG2	JUN	0.0892766	0.120008	0.358546	0.423507	0.48732	0.526651

## Sheet: HM
Correlation
K562 G1
histone	only_roseq_128	only_roseq_1k	only_roseq_10k	only_roseq_128_Spearman	only_roseq_Spearman	only_roseq_10k_Spearman
H3K122ac	0.5491	0.6591	0.7205	0.5148	0.5824	0.7519
H3K4me1	0.5485	0.5899	0.6804	0.7472	0.8475	0.8983
H3K4me2	0.736	0.7831	0.8378	0.6334	0.7852	0.881
H3K4me3	0.758	0.8007	0.8458	0.6512	0.7898	0.8728
H3K27ac	0.7614	0.8185	0.863	0.6838	0.8301	0.901
H3K27me3	0.4331	0.4863	0.5318	0.6851	0.7971	0.8398
H3K36me3	0.711	0.7714	0.8254	0.761	0.8736	0.9145
H3K9ac	0.8199	0.8591	0.8903	0.7273	0.8376	0.8999
H3K9me3	0.3823	0.4393	0.5094	0.2024	0.2284	0.2708
H4K20me1	0.5426	0.579	0.6178	0.7329	0.7886	0.8024
histone	ro+seq_128	ro+seq_1k	ro+seq_10k	ro+seq_128k_Spearman	ro+seq_1k_Spearman	ro+seq_10k_Spearman
H3K122ac	0.6219	0.6869	0.7141	0.5582	0.6456	0.8211
H3K4me1	0.5917	0.6131	0.6773	0.7739	0.8694	0.9117
H3K4me2	0.768	0.7906	0.8236	0.6808	0.826	0.9031
H3K4me3	0.7654	0.7899	0.8151	0.6894	0.824	0.8948
H3K27ac	0.7882	0.8202	0.8511	0.7165	0.8467	0.9026
H3K27me3	0.4678	0.488	0.5016	0.7254	0.8252	0.8587
H3K36me3	0.7512	0.7831	0.8098	0.7851	0.888	0.9204
H3K9ac	0.8297	0.8534	0.8691	0.7524	0.8534	0.9045
H3K9me3	0.5401	0.5662	0.5924	0.7818	0.8185	0.8366
H4K20me1	0.5432	0.5588	0.5686	0.7966	0.8414	0.8488
histone	only_seq_128	only_seq_1k	only_seq_10k	only_seq_128_Spearmanr	only_seq_1k_Spearmanr	only_seq_10k_Spearmanr
H3K122ac	0.3478	0.428	0.4776	0.3916	0.5108	0.6993
H3K4me1	0.3451	0.3616	0.4324	0.6758	0.7744	0.8121
H3K4me2	0.5197	0.5503	0.5789	0.4477	0.5754	0.7391
H3K4me3	0.5359	0.5648	0.5819	0.5461	0.7061	0.7918
H3K27ac	0.4669	0.5068	0.5436	0.628	0.7641	0.8172
H3K27me3	0.3397	0.3583	0.3733	0.629	0.718	0.7236
H3K36me3	0.4061	0.4241	0.4427	0.6696	0.7788	0.8119
H3K9ac	0.5414	0.5767	0.596	0.6354	0.7541	0.812
H3K9me3	0.2504	0.2293	0.2123	0.3537	0.3428	0.4238
H4K20me1	0.3968	0.4083	0.4164	0.7467	0.7862	0.7819
G2
histone	only_roseq_128	only_roseq_1k	only_roseq_10k	only_roseq_128_Spearman	only_roseq_Spearman	only_roseq_10k_Spearman
H3K122ac	0.4655	0.5664	0.6297	0.4618	0.5202	0.6702
H3K4me1	0.4181	0.4467	0.5178	0.6466	0.7292	0.7831
H3K4me2	0.6407	0.6812	0.7234	0.5297	0.6533	0.7493
H3K4me3	0.6631	0.6959	0.7253	0.5319	0.6479	0.7372
H3K27ac	0.6438	0.6929	0.7307	0.6166	0.7513	0.8267
H3K27me3	0.3641	0.4077	0.4444	0.5973	0.6991	0.7242
H3K36me3	0.6341	0.6775	0.7136	0.7035	0.8047	0.8461
H3K9ac	0.7074	0.7384	0.761	0.684	0.7919	0.8569
H3K9me3	0.1644	0.1558	0.1478	0.0797	0.0691	0.0753
H4K20me1	0.4368	0.4595	0.4801	0.6561	0.7024	0.7071
histone	ro+seq_128	ro+seq_1k	ro+seq_10k	ro+seq_128k_Spearman	ro+seq_1k_Spearman	ro+seq_10k_Spearman
H3K122ac	0.563	0.6268	0.6591	0.5545	0.6402	0.8151
H3K4me1	0.4803	0.4955	0.5543	0.7423	0.8357	0.8732
H3K4me2	0.7028	0.7203	0.7417	0.6548	0.7965	0.8655
H3K4me3	0.7039	0.7216	0.7305	0.6533	0.7819	0.8469
H3K27ac	0.7014	0.7313	0.7612	0.6931	0.8206	0.8717
H3K27me3	0.4247	0.4394	0.4487	0.6921	0.7866	0.8105
H3K36me3	0.6524	0.6768	0.697	0.7693	0.8706	0.9
H3K9ac	0.754	0.7753	0.7851	0.7241	0.8203	0.8691
H3K9me3	0.4719	0.4875	0.5026	0.7541	0.7756	0.7693
H4K20me1	0.4815	0.4922	0.4974	0.7818	0.8206	0.8193
histone	only_seq_128	only_seq_1k	only_seq_10k	only_seq_128_Spearmanr	only_seq_1k_Spearmanr	only_seq_10k_Spearmanr
H3K122ac	0.3478	0.428	0.4776	0.3916	0.5108	0.6993
H3K4me1	0.3451	0.3616	0.4324	0.6758	0.7744	0.8121
H3K4me2	0.5197	0.5503	0.5789	0.4477	0.5753	0.739
H3K4me3	0.5359	0.5648	0.5819	0.5461	0.706	0.7918
H3K27ac	0.4669	0.5068	0.5435	0.628	0.7641	0.8172
H3K27me3	0.3397	0.3583	0.3733	0.629	0.718	0.7236
H3K36me3	0.4061	0.4241	0.4427	0.6696	0.7788	0.8119
H3K9ac	0.5414	0.5767	0.596	0.6354	0.7541	0.812
H3K9me3	0.2504	0.2294	0.2124	0.3538	0.3429	0.4239
H4K20me1	0.3968	0.4083	0.4164	0.7467	0.7862	0.7819
G3
histone	only_roseq_128	only_roseq_1k	only_roseq_10k	only_roseq_128_Spearman	only_roseq_Spearman	only_roseq_10k_Spearman
H3K122ac	0.4985	0.5936	0.6501	0.5531	0.6249	0.8064
H3K4me1	0.5447	0.5852	0.6721	0.739	0.8407	0.8909
H3K4me2	0.7119	0.76	0.8207	0.6312	0.7861	0.8796
H3K4me3	0.7315	0.7762	0.8226	0.641	0.7823	0.8641
H3K27ac	0.7483	0.8107	0.8673	0.674	0.8211	0.8918
H3K27me3	0.419	0.4702	0.5136	0.6855	0.7976	0.8415
H3K36me3	0.7008	0.7604	0.8155	0.7539	0.8664	0.9061
H3K9ac	0.8184	0.8603	0.8921	0.7157	0.8257	0.8868
H3K9me3	0.3622	0.4165	0.4888	0.3252	0.3734	0.4326
H4K20me1	0.5314	0.5655	0.6049	0.7318	0.7883	0.803
histone	ro+seq_128	ro+seq_1k	ro+seq_10k	ro+seq_128k_Spearman	ro+seq_1k_Spearman	ro+seq_10k_Spearman
H3K122ac	0.6262	0.6836	0.7068	0.5535	0.6401	0.8204
H3K4me1	0.6014	0.6237	0.6839	0.7679	0.8622	0.9052
H3K4me2	0.781	0.8038	0.8379	0.6774	0.8204	0.8942
H3K4me3	0.7846	0.8093	0.8342	0.6851	0.8172	0.8866
H3K27ac	0.8166	0.8524	0.8818	0.718	0.8467	0.9005
H3K27me3	0.4441	0.4605	0.4716	0.72	0.8197	0.8529
H3K36me3	0.7757	0.8085	0.8361	0.789	0.8917	0.9238
H3K9ac	0.8576	0.8813	0.8945	0.7519	0.8514	0.9008
H3K9me3	0.5359	0.5612	0.5867	0.7783	0.8119	0.8222
H4K20me1	0.5438	0.5587	0.5679	0.797	0.8414	0.8483
histone	only_seq_128	only_seq_1k	only_seq_10k	only_seq_128_Spearmanr	only_seq_1k_Spearmanr	only_seq_10k_Spearmanr
H3K122ac	0.3478	0.428	0.4776	0.3916	0.5108	0.6992
H3K4me1	0.3451	0.3616	0.4324	0.6758	0.7744	0.8121
H3K4me2	0.5197	0.5503	0.5789	0.4477	0.5754	0.7391
H3K4me3	0.5359	0.5648	0.5819	0.5461	0.706	0.7918
H3K27ac	0.4669	0.5068	0.5436	0.628	0.7641	0.8172
H3K27me3	0.3397	0.3583	0.3733	0.629	0.718	0.7236
H3K36me3	0.4061	0.4241	0.4427	0.6696	0.7788	0.8119
H3K9ac	0.5414	0.5767	0.596	0.6354	0.7541	0.812
H3K9me3	0.2504	0.2294	0.2123	0.3538	0.3429	0.4237
H4K20me1	0.3968	0.4083	0.4164	0.7467	0.7862	0.7819
G4
histone	only_roseq_128	only_roseq_1k	only_roseq_10k	only_roseq_128_Spearman	only_roseq_Spearman	only_roseq_10k_Spearman
H3K122ac	0.4852	0.5941	0.6746	0.5234	0.5965	0.7899
H3K4me1	0.5123	0.5495	0.6405	0.7328	0.8331	0.8831
H3K4me2	0.7268	0.7781	0.8459	0.6208	0.7734	0.8685
H3K4me3	0.7441	0.7924	0.8464	0.6324	0.7729	0.8536
H3K27ac	0.7392	0.8052	0.8639	0.6763	0.822	0.8925
H3K27me3	0.4041	0.4534	0.4964	0.6762	0.7881	0.829
H3K36me3	0.6935	0.748	0.8007	0.7515	0.8631	0.9029
H3K9ac	0.8168	0.8615	0.8998	0.711	0.8199	0.8809
H3K9me3	0.3422	0.3941	0.4705	0.2958	0.3374	0.4008
H4K20me1	0.543	0.5761	0.6152	0.7359	0.7904	0.8031
histone	ro+seq_128	ro+seq_1k	ro+seq_10k	ro+seq_128k_Spearman	ro+seq_1k_Spearman	ro+seq_10k_Spearman
H3K122ac	0.6326	0.704	0.7353	0.5437	0.6308	0.8155
H3K4me1	0.5861	0.6089	0.672	0.7684	0.8631	0.9052
H3K4me2	0.7881	0.8142	0.8539	0.6748	0.8193	0.8951
H3K4me3	0.7919	0.8199	0.8516	0.6865	0.8198	0.8897
H3K27ac	0.8345	0.8714	0.9029	0.7178	0.8473	0.9025
H3K27me3	0.4383	0.4548	0.4653	0.7113	0.8104	0.8416
H3K36me3	0.7681	0.8024	0.8345	0.7853	0.8879	0.9207
H3K9ac	0.8639	0.8902	0.91	0.7531	0.8535	0.9042
H3K9me3	0.5406	0.5677	0.5951	0.7807	0.8159	0.8273
H4K20me1	0.5337	0.5484	0.5599	0.7978	0.8422	0.848
histone	only_seq_128	only_seq_1k	only_seq_10k	only_seq_128_Spearmanr	only_seq_1k_Spearmanr	only_seq_10k_Spearmanr
H3K122ac	0.3478	0.428	0.4776	0.3916	0.5108	0.6992
H3K4me1	0.3451	0.3616	0.4324	0.6758	0.7744	0.8121
H3K4me2	0.5197	0.5503	0.5789	0.4477	0.5754	0.7391
H3K4me3	0.5359	0.5648	0.5819	0.5461	0.706	0.7918
H3K27ac	0.4669	0.5068	0.5436	0.628	0.7641	0.8172
H3K27me3	0.3397	0.3583	0.3733	0.629	0.718	0.7236
H3K36me3	0.4061	0.4241	0.4427	0.6696	0.7788	0.8119
H3K9ac	0.5414	0.5767	0.596	0.6354	0.7541	0.812
H3K9me3	0.2504	0.2294	0.2123	0.3538	0.3429	0.4237
H4K20me1	0.3968	0.4083	0.4164	0.7467	0.7862	0.7819
G5
histone	only_roseq_128	only_roseq_1k	only_roseq_10k	only_roseq_128_Spearman	only_roseq_Spearman	only_roseq_10k_Spearman
H3K122ac	0.5411	0.644	0.7058	0.5072	0.5766	0.7514
H3K4me1	0.5162	0.547	0.6269	0.7019	0.7969	0.8462
H3K4me2	0.7246	0.7657	0.8172	0.5855	0.7274	0.8216
H3K4me3	0.7465	0.7822	0.8183	0.6042	0.7411	0.8233
H3K27ac	0.7561	0.8112	0.8573	0.6573	0.7987	0.8672
H3K27me3	0.4222	0.4729	0.5155	0.6546	0.7651	0.8018
H3K36me3	0.7028	0.7501	0.792	0.738	0.8464	0.8843
H3K9ac	0.8247	0.8573	0.8809	0.6989	0.8068	0.869
H3K9me3	0.3327	0.3743	0.4488	0.2879	0.3166	0.3808
H4K20me1	0.5275	0.5546	0.5838	0.7184	0.7694	0.7791
histone	ro+seq_128	ro+seq_1k	ro+seq_10k	ro+seq_128k_Spearman	ro+seq_1k_Spearman	ro+seq_10k_Spearman
H3K122ac	0.6478	0.7134	0.7379	0.5541	0.6413	0.8222
H3K4me1	0.5625	0.5815	0.6438	0.7599	0.8543	0.8929
H3K4me2	0.7674	0.789	0.8224	0.6688	0.8113	0.8829
H3K4me3	0.7712	0.7939	0.8151	0.6734	0.8043	0.871
H3K27ac	0.8058	0.8401	0.8698	0.7075	0.8346	0.8867
H3K27me3	0.4588	0.4773	0.4892	0.7213	0.8203	0.8522
H3K36me3	0.7496	0.7805	0.8064	0.7794	0.8813	0.9107
H3K9ac	0.8445	0.8663	0.8766	0.7407	0.8384	0.8874
H3K9me3	0.5236	0.5463	0.5693	0.7709	0.8008	0.8088
H4K20me1	0.5349	0.5482	0.5561	0.7934	0.8373	0.8443
histone	only_seq_128	only_seq_1k	only_seq_10k	only_seq_128_Spearmanr	only_seq_1k_Spearmanr	only_seq_10k_Spearmanr
H3K122ac	0.3478	0.428	0.4776	0.3916	0.5108	0.6992
H3K4me1	0.3451	0.3616	0.4324	0.6758	0.7744	0.8121
H3K4me2	0.5197	0.5503	0.5789	0.4477	0.5754	0.7391
H3K4me3	0.5359	0.5648	0.5819	0.5461	0.706	0.7918
H3K27ac	0.4669	0.5068	0.5436	0.628	0.7641	0.8172
H3K27me3	0.3397	0.3583	0.3733	0.629	0.718	0.7236
H3K36me3	0.4061	0.4241	0.4427	0.6696	0.7788	0.8119
H3K9ac	0.5414	0.5767	0.596	0.6354	0.7541	0.812
H3K9me3	0.2504	0.2294	0.2123	0.3538	0.3429	0.4237
H4K20me1	0.3968	0.4083	0.4164	0.7467	0.7862	0.7819
G6
histone	only_roseq_128	only_roseq_1k	only_roseq_10k	only_roseq_128_Spearman	only_roseq_Spearman	only_roseq_10k_Spearman
H3K122ac	0.5221	0.6167	0.671	0.5155	0.5771	0.7383
H3K4me1	0.4959	0.5272	0.6011	0.689	0.78	0.8328
H3K4me2	0.699	0.7382	0.7773	0.5689	0.703	0.8032
H3K4me3	0.7155	0.7502	0.7746	0.593	0.723	0.8071
H3K27ac	0.7188	0.7756	0.8195	0.6447	0.7855	0.8564
H3K27me3	0.4229	0.4733	0.5158	0.639	0.7442	0.7741
H3K36me3	0.698	0.7471	0.7883	0.7285	0.8359	0.8739
H3K9ac	0.7833	0.8196	0.8383	0.6918	0.7979	0.8645
H3K9me3	0.2687	0.2936	0.3384	0.1735	0.188	0.2306
H4K20me1	0.5029	0.5301	0.5586	0.6981	0.7477	0.7562
histone	ro+seq_128	ro+seq_1k	ro+seq_10k	ro+seq_128k_Spearman	ro+seq_1k_Spearman	ro+seq_10k_Spearman
H3K122ac	0.6303	0.6917	0.7094	0.5511	0.635	0.8153
H3K4me1	0.5413	0.5574	0.6118	0.7569	0.8506	0.8903
H3K4me2	0.7449	0.7624	0.7793	0.6653	0.8075	0.879
H3K4me3	0.7491	0.768	0.775	0.6711	0.8012	0.8677
H3K27ac	0.7644	0.7944	0.8143	0.705	0.8329	0.8859
H3K27me3	0.4551	0.4731	0.4846	0.7043	0.8002	0.8266
H3K36me3	0.7263	0.7551	0.7783	0.7789	0.8806	0.9109
H3K9ac	0.8121	0.833	0.8351	0.7383	0.8363	0.8856
H3K9me3	0.5076	0.5281	0.5484	0.7683	0.7981	0.8034
H4K20me1	0.5169	0.5295	0.5359	0.789	0.8303	0.8334
histone	only_seq_128	only_seq_1k	only_seq_10k	only_seq_128_Spearmanr	only_seq_1k_Spearmanr	only_seq_10k_Spearmanr
H3K122ac	0.3478	0.428	0.4776	0.3916	0.5108	0.6993
H3K4me1	0.3451	0.3616	0.4324	0.6758	0.7744	0.8121
H3K4me2	0.5197	0.5503	0.5789	0.4477	0.5754	0.7391
H3K4me3	0.5359	0.5648	0.5819	0.5461	0.7061	0.7918
H3K27ac	0.4669	0.5068	0.5436	0.628	0.7641	0.8172
H3K27me3	0.3397	0.3583	0.3733	0.629	0.718	0.7236
H3K36me3	0.4061	0.4241	0.4427	0.6696	0.7788	0.8119
H3K9ac	0.5414	0.5767	0.596	0.6354	0.7541	0.812
H3K9me3	0.2504	0.2293	0.2123	0.3537	0.3428	0.4238
H4K20me1	0.3968	0.4083	0.4164	0.7467	0.7862	0.7819
G7
histone	only_roseq_128	only_roseq_1k	only_roseq_10k	only_roseq_128_Spearman	only_roseq_Spearman	only_roseq_10k_Spearman
H3K122ac	0.5112	0.5962	0.6498	0.5044	0.5625	0.708
H3K4me1	0.5171	0.5495	0.6222	0.6703	0.7543	0.811
H3K4me2	0.6871	0.7248	0.7626	0.5539	0.6784	0.7796
H3K4me3	0.7034	0.7362	0.758	0.5735	0.6945	0.7876
H3K27ac	0.7062	0.7591	0.8033	0.6476	0.7877	0.8605
H3K27me3	0.4167	0.4664	0.5082	0.6337	0.7384	0.7673
H3K36me3	0.6898	0.7388	0.7807	0.7282	0.8336	0.8742
H3K9ac	0.7714	0.8048	0.8226	0.6927	0.7989	0.8666
H3K9me3	0.269	0.2941	0.3386	0.1945	0.2107	0.256
H4K20me1	0.4971	0.524	0.5519	0.6964	0.7463	0.756
histone	ro+seq_128	ro+seq_1k	ro+seq_10k	ro+seq_128k_Spearman	ro+seq_1k_Spearman	ro+seq_10k_Spearman
H3K122ac	0.6355	0.6967	0.716	0.5545	0.6403	0.8188
H3K4me1	0.557	0.5752	0.6327	0.7579	0.8521	0.8919
H3K4me2	0.7477	0.7655	0.7843	0.6658	0.8083	0.8804
H3K4me3	0.7507	0.77	0.7787	0.6725	0.8036	0.8703
H3K27ac	0.7811	0.8114	0.8319	0.7066	0.8347	0.8875
H3K27me3	0.4543	0.472	0.4835	0.7065	0.8029	0.83
H3K36me3	0.7248	0.7534	0.7759	0.7792	0.881	0.9116
H3K9ac	0.822	0.8434	0.8468	0.7399	0.838	0.8877
H3K9me3	0.5074	0.528	0.5486	0.7682	0.7976	0.8031
H4K20me1	0.5158	0.5284	0.5348	0.7901	0.8312	0.8337
histone	only_seq_128	only_seq_1k	only_seq_10k	only_seq_128_Spearmanr	only_seq_1k_Spearmanr	only_seq_10k_Spearmanr
H3K122ac	0.3478	0.428	0.4776	0.716	0.5108	0.6992
H3K4me1	0.3451	0.3616	0.4324	0.6327	0.7744	0.8121
H3K4me2	0.5197	0.5503	0.5789	0.7843	0.5754	0.7391
H3K4me3	0.5359	0.5648	0.5819	0.7787	0.706	0.7918
H3K27ac	0.4669	0.5068	0.5436	0.8319	0.7641	0.8172
H3K27me3	0.3397	0.3583	0.3733	0.4835	0.718	0.7236
H3K36me3	0.4061	0.4241	0.4427	0.7759	0.7788	0.8119
H3K9ac	0.5414	0.5767	0.596	0.8468	0.7541	0.812
H3K9me3	0.2504	0.2294	0.2123	0.5486	0.3429	0.4237
H4K20me1	0.3968	0.4083	0.4164	0.5348	0.7862	0.7819
G8
histone	only_roseq_128	only_roseq_1k	only_roseq_10k	only_roseq_128_Spearman	only_roseq_Spearman	only_roseq_10k_Spearman
H3K122ac	0.5299	0.6453	0.716	0.448	0.4999	0.6493
H3K4me1	0.5973	0.6622	0.761	0.5267	0.6726	0.8146
H3K4me2	0.7715	0.828	0.8784	0.3788	0.5191	0.7213
H3K4me3	0.8111	0.8525	0.8908	0.3642	0.4941	0.6741
H3K27ac	0.7071	0.7689	0.8186	0.4485	0.6209	0.7981
H3K27me3	0.3738	0.4823	0.5654	0.4284	0.5563	0.6567
H3K36me3	0.677	0.7815	0.8466	0.5247	0.6635	0.7832
H3K9ac	0.7937	0.8378	0.8789	0.4819	0.6359	0.7907
H3K9me3	0.1858	0.2206	0.2366	0.1745	0.2023	0.229
H4K20me1	0.4437	0.5342	0.5898	0.4772	0.6062	0.6897
histone	ro+seq_128	ro+seq_1k	ro+seq_10k	ro+seq_128k_Spearman	ro+seq_1k_Spearman	ro+seq_10k_Spearman
H3K122ac	0.6703	0.75	0.7887	0.5045	0.5916	0.7379
H3K4me1	0.6913	0.7316	0.8082	0.6137	0.7585	0.8736
H3K4me2	0.8585	0.886	0.9095	0.5355	0.6755	0.8252
H3K4me3	0.8606	0.8909	0.912	0.4655	0.5949	0.7404
H3K27ac	0.7758	0.8153	0.8446	0.5535	0.716	0.864
H3K27me3	0.5739	0.6748	0.7429	0.5741	0.7158	0.8137
H3K36me3	0.7446	0.8169	0.8615	0.5962	0.7215	0.8163
H3K9ac	0.8374	0.871	0.8947	0.5533	0.7	0.8268
H3K9me3	0.5149	0.5653	0.6009	0.5673	0.5902	0.5847
H4K20me1	0.6123	0.6937	0.7376	0.65	0.7794	0.8507
		0.76955
histone	only_seq_128	only_seq_1k	only_seq_10k	only_seq_128_Spearmanr	only_seq_1k_Spearmanr	only_seq_10k_Spearmanr
H3K122ac	0.4473	0.5414	0.5797	0.351	0.4453	0.5735
H3K4me1	0.3854	0.4109	0.488	0.4807	0.6075	0.723
H3K4me2	0.6649	0.7088	0.7293	0.3985	0.485	0.6223
H3K4me3	0.6923	0.7305	0.7422	0.335	0.4207	0.5327
H3K27ac	0.5121	0.5575	0.5681	0.4498	0.5915	0.7328
H3K27me3	0.4518	0.5387	0.6035	0.4938	0.6179	0.7131
H3K36me3	0.4748	0.5246	0.565	0.4454	0.5386	0.6082
H3K9ac	0.632	0.6797	0.6912	0.4087	0.5163	0.6336
H3K9me3	0.3638	0.3763	0.3946	0.427	0.4479	0.4483
H4K20me1	0.5267	0.6044	0.6603	0.5881	0.7145	0.7947
GM12878
histone	only_roseq_128	only_roseq_1k	only_roseq_10k	only_roseq_128_Spearman	only_roseq_Spearman	only_roseq_10k_Spearman
H3K122ac
H3K4me1	0.6216	0.6906	0.784	0.4231	0.5505	0.7367
H3K4me2	0.7379	0.7992	0.8752	0.3464	0.4517	0.6644
H3K4me3	0.7929	0.8596	0.9008	0.3129	0.4027	0.5837
H3K27ac	0.7141	0.7761	0.8179	0.3951	0.5447	0.7385
H3K27me3	0.3386	0.4129	0.4777	0.3916	0.4612	0.5217
H3K36me3	0.6768	0.7787	0.8422	0.4907	0.6027	0.7137
H3K9ac	0.7899	0.8463	0.8916	0.3453	0.4872	0.698
H3K9me3	0.1841	0.2154	0.2794	0.1673	0.2006	0.2461
H4K20me1	0.3393	0.4866	0.6004	0.3431	0.4696	0.5935
histone	ro+seq_128	ro+seq_1k	ro+seq_10k	ro+seq_128k_Spearman	ro+seq_1k_Spearman	ro+seq_10k_Spearman
H3K122ac
H3K4me1	0.7038	0.7634	0.8448	0.5166	0.6534	0.8128
H3K4me2	0.7514	0.8075	0.8892	0.4354	0.564	0.7554
H3K4me3	0.8502	0.9025	0.9309	0.4568	0.5334	0.6818
H3K27ac	0.7554	0.8228	0.8663	0.4242	0.5801	0.7671
H3K27me3	0.5266	0.5789	0.6243	0.5673	0.601	0.621
H3K36me3	0.7148	0.807	0.8634	0.5701	0.6833	0.7771
H3K9ac	0.8248	0.8752	0.912	0.4141	0.5597	0.757
H3K9me3	0.3674	0.3908	0.448	0.4467	0.4489	0.4147
H4K20me1	0.5003	0.6658	0.7871	0.5113	0.6565	0.7922
		0.734878
histone	only_seq_128	only_seq_1k	only_seq_10k	only_seq_128_Spearmanr	only_seq_1k_Spearmanr	only_seq_10k_Spearmanr
H3K122ac
H3K4me1	0.3259	0.35	0.4252	0.4155	0.5316	0.6621
H3K4me2	0.4801	0.5235	0.6042	0.2729	0.3359	0.4873
H3K4me3	0.6559	0.7092	0.7243	0.3435	0.404	0.4911
H3K27ac	0.3969	0.4336	0.4194	0.2808	0.405	0.5739
H3K27me3	0.413	0.4492	0.4834	0.4581	0.4685	0.4718
H3K36me3	0.444	0.5008	0.548	0.4256	0.5158	0.5823
H3K9ac	0.6252	0.6795	0.6742	0.3284	0.4599	0.6311
H3K9me3	0.204	0.1689	0.1322	0.2939	0.2661	0.1656
H4K20me1	0.4454	0.5908	0.7058	0.4777	0.6183	0.7506
HCT116
histone	only_roseq_128	only_roseq_1k	only_roseq_10k	only_roseq_128_Spearman	only_roseq_Spearman	only_roseq_10k_Spearman
H3K122ac
H3K4me1	0.6674	0.7278	0.8089	0.3995	0.4866	0.6579
H3K4me2	0.7667	0.821	0.8643	0.3388	0.4182	0.6125
H3K4me3	0.7785	0.8189	0.8429	0.162	0.1466	0.2017
H3K27ac	0.7565	0.8045	0.8483	0.4143	0.5369	0.7015
H3K27me3	0.1939	0.228	0.2608	0.2652	0.3086	0.3588
H3K36me3	0.4362	0.533	0.619	0.326	0.3685	0.4032
H3K9ac	0.7935	0.8394	0.8791	0.3872	0.4905	0.6791
H3K9me3	-0.0395	-0.0616	-0.0866	0.0341	-0.0015	-0.0666
H4K20me1	0.2951	0.3917	0.4687	0.293	0.3419	0.3863
histone	ro+seq_128	ro+seq_1k	ro+seq_10k	ro+seq_128k_Spearman	ro+seq_1k_Spearman	ro+seq_10k_Spearman
H3K122ac
H3K4me1	0.7053	0.7612	0.8371	0.4724	0.5511	0.703
H3K4me2	0.7779	0.8345	0.879	0.4394	0.499	0.6626
H3K4me3	0.8108	0.8505	0.8664	0.4125	0.359	0.353
H3K27ac	0.7201	0.7832	0.8335	0.428	0.5221	0.6638
H3K27me3	0.3093	0.34	0.3629	0.3962	0.4086	0.4193
H3K36me3	0.5442	0.6355	0.7061	0.4896	0.5091	0.5069
H3K9ac	0.7789	0.8259	0.8598	0.5392	0.5982	0.7267
H3K9me3	0.3672	0.3774	0.3697	0.4461	0.4372	0.4079
H4K20me1	0.2737	0.3272	0.3679	0.3405	0.3283	0.3235
		0.637267
histone	only_seq_128	only_seq_1k	only_seq_10k	only_seq_128_Spearmanr	only_seq_1k_Spearmanr	only_seq_10k_Spearmanr
H3K122ac
H3K4me1	0.3272	0.3495	0.4378	0.3736	0.4234	0.5339
H3K4me2	0.6114	0.6588	0.7034	0.2084	0.2457	0.3729
H3K4me3	0.6876	0.7442	0.7892	0.3224	0.3065	0.2651
H3K27ac	0.3911	0.4243	0.4431	0.2818	0.3591	0.483
H3K27me3	0.3131	0.3447	0.3738	0.3591	0.3736	0.386
H3K36me3	0.3941	0.4449	0.4902	0.3907	0.3994	0.3833
H3K9ac	0.6309	0.6914	0.7071	0.4126	0.466	0.5559
H3K9me3	0.304	0.3157	0.348	0.3563	0.3753	0.398
H4K20me1	0.2081	0.2387	0.2802	0.2661	0.2446	0.2391
HeLa
histone	only_roseq_128	only_roseq_1k	only_roseq_10k	only_roseq_128_Spearman	only_roseq_Spearman	only_roseq_10k_Spearman
H3K122ac
H3K4me1	0.5249	0.5795	0.6684	0.2754	0.3546	0.4873
H3K4me2	0.6266	0.7099	0.8365	0.2339	0.3011	0.4336
H3K4me3	0.7736	0.8218	0.8676	0.2657	0.3488	0.4829
H3K27ac	0.7425	0.7963	0.8387	0.3512	0.4673	0.6195
H3K27me3	-0.0108	-0.01508	-0.0209	0.0297	0.0145	0.0023
H3K36me3	0.6069	0.6767	0.7292	0.3879	0.4539	0.5229
H3K9ac	0.7653	0.8204	0.867	0.3701	0.4796	0.6153
H3K9me3	0.0515	0.0502	0.037	0.0636	0.0698	0.0652
H4K20me1	0.243	0.3532	0.4516	0.2175	0.293	0.3938
histone	ro+seq_128	ro+seq_1k	ro+seq_10k	ro+seq_128k_Spearman	ro+seq_1k_Spearman	ro+seq_10k_Spearman
H3K122ac
H3K4me1	0.616	0.657	0.7275	0.4135	0.4985	0.6142
H3K4me2	0.6776	0.7443	0.8578	0.4787	0.5299	0.6096
H3K4me3	0.8404	0.8722	0.8967	0.4243	0.4828	0.5995
H3K27ac	0.7635	0.8116	0.8508	0.5827	0.6952	0.7895
H3K27me3	0.2847	0.2853	0.2799	0.3802	0.3675	0.341
H3K36me3	0.6772	0.7405	0.7778	0.5774	0.6327	0.6525
H3K9ac	0.8056	0.8483	0.8798	0.4675	0.5732	0.7208
H3K9me3	0.4628	0.4984	0.501	0.5177	0.4621	0.3257
H4K20me1	0.4265	0.5467	0.6415	0.4839	0.5784	0.678
histone	only_seq_128	only_seq_1k	only_seq_10k	only_seq_128_Spearmanr	only_seq_1k_Spearmanr	only_seq_10k_Spearmanr
H3K122ac
H3K4me1	0.3064	0.3157	0.3672	0.3883	0.4352	0.4906
H3K4me2	0.5272	0.5776	0.6719	0.2921	0.3329	0.3835
H3K4me3	0.704	0.7479	0.7711	0.4081	0.5055	0.5854
H3K27ac	0.5015	0.5364	0.5247	0.5046	0.6133	0.6858
H3K27me3	0.4145	0.4435	0.4649	0.4509	0.4681	0.4731
H3K36me3	0.4782	0.5136	0.5366	0.464	0.4875	0.4839
H3K9ac	0.6492	0.7097	0.7237	0.4164	0.5361	0.6584
H3K9me3	0.3364	0.3365	0.2899	0.4022	0.3751	0.2611
H4K20me1	0.3809	0.4924	0.5929	0.468	0.5658	0.6617
CD4 + T cells
histone	only_roseq_128	only_roseq_1k	only_roseq_10k	only_roseq_128_Spearman	only_roseq_Spearman	only_roseq_10k_Spearman
H3K122ac
H3K4me1	0.3904	0.4891	0.5996	0.312	0.415	0.5732
H3K4me2
H3K4me3	0.6805	0.7874	0.8259	0.1146	0.1652	0.3116
H3K27ac
H3K27me3	0.0274	0.0423	0.0531	0.0657	0.1009	0.1096
H3K36me3	0.3052	0.4096	0.5096	0.2845	0.4143	0.5755
H3K9ac	0.4075	0.5686	0.6308	0.1381	0.2359	0.3971
H3K9me3	0.0114	0.0201	0.0406	0.0905	0.1484	0.186
H4K20me1
histone	ro+seq_128	ro+seq_1k	ro+seq_10k	ro+seq_128k_Spearman	ro+seq_1k_Spearman	ro+seq_10k_Spearman
H3K122ac
H3K4me1	0.4623	0.5377	0.64	0.424	0.5924	0.787
H3K4me2
H3K4me3	0.7668	0.8494	0.8697	0.3146	0.388	0.4963
H3K27ac
H3K27me3	0.1987	0.2372	0.2576	0.2519	0.3152	0.3176
H3K36me3	0.3786	0.4604	0.5451	0.3962	0.5484	0.6878
H3K9ac	0.4763	0.6442	0.7145	0.2499	0.3637	0.4883
H3K9me3	0.174	0.2887	0.4016	0.2333	0.3953	0.4838
H4K20me1
histone	only_seq_128	only_seq_1k	only_seq_10k	only_seq_128_Spearmanr	only_seq_1k_Spearmanr	only_seq_10k_Spearmanr
H3K122ac
H3K4me1	0.3058	0.3667	0.4556	0.3773	0.5415	0.7268
H3K4me2
H3K4me3	0.5766	0.6869	0.7149	0.2898	0.3761	0.4349
H3K27ac
H3K27me3	0.286	0.3827	0.4472	0.3199	0.417	0.4563
H3K36me3	0.2673	0.3219	0.3811	0.3172	0.4302	0.5228
H3K9ac	0.3321	0.464	0.4778	0.2046	0.288	0.3626
H3K9me3	0.1367	0.2367	0.3726	0.1367	0.2367	0.3726
H4K20me1
IMR-90
histone	only_roseq_128	only_roseq_1k	only_roseq_10k	only_roseq_128_Spearman	only_roseq_Spearman	only_roseq_10k_Spearman
H3K122ac
H3K4me1	0.4559	0.5992	0.7292	0.108	0.3144	0.663
H3K4me2	0.6749	0.8025	0.8788	-0.1831	-0.0809	0.2733
H3K4me3	0.7087	0.79	0.8652	-0.483	-0.5063	-0.4245
H3K27ac	0.64	0.749	0.7924	-0.1657	-0.0659	0.161
H3K27me3	0.2532	0.3008	0.3544	0.1564	0.2655	0.3484
H3K36me3	0.4701	0.5788	0.6728	0.0582	0.1958	0.2751
H3K9ac	0.7214	0.8185	0.8601	-0.1522	0.0339	0.3343
H3K9me3	-0.0653	-0.1043	-0.1513	-0.181	-0.2015	-0.2221
H4K20me1	0.4179	0.4987	0.537	0.1797	0.4565	0.6354
histone	ro+seq_128	ro+seq_1k	ro+seq_10k	ro+seq_128k_Spearman	ro+seq_1k_Spearman	ro+seq_10k_Spearman
H3K122ac
H3K4me1	0.5491	0.6599	0.7736	0.1106	0.2817	0.6183
H3K4me2	0.7503	0.8386	0.8963	-0.1919	-0.1387	0.2049
H3K4me3	0.733	0.8035	0.8755	-0.46	-0.518	-0.4464
H3K27ac	0.6744	0.7603	0.801	-0.2408	-0.1823	0.0599
H3K27me3	0.4286	0.4686	0.5276	0.2415	0.3358	0.4076
H3K36me3	0.4848	0.5601	0.6382	0.0632	0.1778	0.2506
H3K9ac	0.7592	0.8382	0.8684	-0.145	0.026	0.323
H3K9me3	0.0773	0.0175	-0.043	-0.0327	-0.067	-0.1275
H4K20me1	0.4522	0.5076	0.5376	0.2443	0.5616	0.7531
histone	only_seq_128	only_seq_1k	only_seq_10k	only_seq_128_Spearmanr	only_seq_1k_Spearmanr	only_seq_10k_Spearmanr
H3K122ac
H3K4me1	0.2096	0.24	0.3074	0.0392	0.108	0.3203
H3K4me2	0.5462	0.6394	0.6979	-0.1184	-0.1241	0.0467
H3K4me3	0.6259	0.7181	0.766	-0.2658	-0.3131	-0.245
H3K27ac	0.3409	0.4007	0.372	-0.2541	-0.2903	-0.1634
H3K27me3	0.282	0.2954	0.3224	0.1306	0.1772	0.215
H3K36me3	0.2227	0.2684	0.3287	0.0316	0.094	0.1443
H3K9ac	0.5447	0.631	0.6247	-0.1096	-0.0217	0.1603
H3K9me3	0.1135	0.0726	0.0338	0.1045	0.1063	0.0991
H4K20me1	0.2466	0.2727	0.2993	0.2097	0.4785	0.6575
MCF-7
histone	only_roseq_128	only_roseq_1k	only_roseq_10k	only_roseq_128_Spearman	only_roseq_Spearman	only_roseq_10k_Spearman
H3K122ac
H3K4me1	0.4616	0.5156	0.5982	0.3985	0.4836	0.6201
H3K4me2	0.6716	0.7443	0.8264	0.3205	0.3991	0.5553
H3K4me3	0.7533	0.8137	0.834	0.2745	0.369	0.5086
H3K27ac	0.4489	0.5183	0.5604	0.1787	0.3104	0.4554
H3K27me3	0.0297	0.0338	0.039	-0.0095	0.034	0.0695
H3K36me3	0.5109	0.5836	0.6527	0.4251	0.5156	0.5903
H3K9ac	0.723	0.7676	0.7806	0.2713	0.4102	0.5867
H3K9me3	-0.0203	-0.0395	-0.0638	-0.0475	-0.0831	-0.1445
H4K20me1	0.255	0.2783	0.2884	0.278	0.3546	0.401
histone	ro+seq_128	ro+seq_1k	ro+seq_10k	ro+seq_128k_Spearman	ro+seq_1k_Spearman	ro+seq_10k_Spearman
H3K122ac
H3K4me1	0.5214	0.5686	0.6397	0.4812	0.5633	0.6701
H3K4me2	0.7046	0.7715	0.8448	0.4128	0.4728	0.5991
H3K4me3	0.8181	0.8598	0.8705	0.4152	0.464	0.5531
H3K27ac	0.4693	0.5281	0.5634	0.2373	0.3409	0.4467
H3K27me3	0.0929	0.071	0.0613	0.0354	0.0291	0.0131
H3K36me3	0.5522	0.6214	0.6849	0.5197	0.5988	0.6507
H3K9ac	0.7483	0.786	0.7903	0.3511	0.4887	0.6253
H3K9me3	0.1939	0.1837	0.1967	0.2266	0.3117	0.3359
H4K20me1	0.3272	0.3513	0.3629	0.447	0.5273	0.5944
histone	only_seq_128	only_seq_1k	only_seq_10k	only_seq_128_Spearmanr	only_seq_1k_Spearmanr	only_seq_10k_Spearmanr
H3K122ac
H3K4me1	0.2221	0.2435	0.3145	0.5283	0.4481	0.5283
H3K4me2	0.5906	0.6505	0.7259	0.3483	0.2353	0.3483
H3K4me3	0.7107	0.7716	0.8066	0.4619	0.4113	0.4619
H3K27ac	0.2324	0.2551	0.23	0.2802	0.2059	0.2802
H3K27me3	0.0649	0.0454	0.0399	-0.0608	-0.0464	-0.0608
H3K36me3	0.3433	0.3815	0.4322	0.4496	0.4284	0.4496
H3K9ac	0.6011	0.6657	0.6663	0.5112	0.3949	0.5112
H3K9me3	0.1347	0.1174	0.1504	0.3414	0.2599	0.3414
H4K20me1	0.2461	0.2632	0.2874	0.5498	0.4729	0.5498
HepG2
histone	only_roseq_128	only_roseq_1k	only_roseq_10k	only_roseq_128_Spearman	only_roseq_Spearman	only_roseq_10k_Spearman
H3K122ac
H3K4me1	0.3014	0.3449	0.4624	0.3534	0.4729	0.6032
H3K4me2	0.513	0.5952	0.6921	0.0098	0.0784	0.2638
H3K4me3	0.5	0.5667	0.699	0.0028	0.073	0.2413
H3K27ac	0.5016	0.5624	0.6117	0.1668	0.3234	0.5012
H3K27me3	0.2065	0.2597	0.3157	0.1257	0.1872	0.2539
H3K36me3	0.4694	0.583	0.6841	0.1738	0.317	0.4167
H3K9ac	0.5677	0.6339	0.7291	0.1776	0.3209	0.512
H3K9me3	-0.074	-0.1014	-0.1384	-0.0855	-0.1286	-0.2111
H4K20me1	0.3287	0.3936	0.4473	0.1449	0.2339	0.3084
histone	ro+seq_128	ro+seq_1k	ro+seq_10k	ro+seq_128k_Spearman	ro+seq_1k_Spearman	ro+seq_10k_Spearman
H3K122ac
H3K4me1	0.4735	0.52	0.6191	0.3751	0.538	0.7066
H3K4me2	0.6567	0.7194	0.7952	-0.1128	-0.0283	0.2147
H3K4me3	0.6583	0.7254	0.8196	-0.1369	-0.0105	0.2125
H3K27ac	0.595	0.6456	0.6766	0.0862	0.2634	0.4437
H3K27me3	0.4111	0.4716	0.5377	0.2383	0.3388	0.4039
H3K36me3	0.492	0.5745	0.6571	0.0611	0.2165	0.3406
H3K9ac	0.7239	0.7797	0.8332	0.2153	0.3909	0.5832
H3K9me3	0.053	0.0197	-0.0136	0.2311	0.1647	0.0207
H4K20me1	0.3614	0.414	0.4584	0.2327	0.3519	0.433
histone	only_seq_128	only_seq_1k	only_seq_10k	only_seq_128_Spearmanr	only_seq_1k_Spearmanr	only_seq_10k_Spearmanr
H3K122ac
H3K4me1	0.2295	0.2536	0.3265	0.2842	0.4394	0.6052
H3K4me2	0.4862	0.5491	0.6536	-0.024	0.0567	0.2718
H3K4me3	0.6488	0.722	0.7606	-0.1415	-0.0364	0.1712
H3K27ac	0.3221	0.3544	0.3532	0.008	0.1115	0.2475
H3K27me3	0.3677	0.4221	0.4832	0.2469	0.3527	0.4196
H3K36me3	0.2838	0.3412	0.4053	-0.0126	0.0978	0.2051
H3K9ac	0.5986	0.6698	0.6906	0.1852	0.3407	0.5215
H3K9me3	0.1393	0.1369	0.1614	0.3054	0.3355	0.3707
H4K20me1	0.2112	0.2354	0.2639	0.1981	0.305	0.3979
Mouse Liver
histone	only_roseq_128	only_roseq_1k	only_roseq_10k	only_roseq_128_Spearman	only_roseq_Spearman	only_roseq_10k_Spearman
H3K122ac
H3K4me1	0.2511	0.3106	0.4466	0.1402	0.1665	0.2046
H3K4me2	0.6213	0.715	0.7877	0.0193	0.0518	0.1246
H3K4me3	0.6147	0.7053	0.7755	0.0085	0.033	0.1263
H3K27ac	0.538	0.6129	0.6736	0.1367	0.232	0.3421
H3K27me3	0.0673	0.0724	0.0906	0.179	0.2299	0.2763
H3K36me3	0.39	0.4285	0.4911	0.2228	0.2608	0.3219
H3K9ac	0.5943	0.6521	0.7259	0.3672	0.4773	0.6024
H3K9me3	0.0572	0.0827	0.1339	0.0663	0.1043	0.1681
H4K20me1
histone	ro+seq_128	ro+seq_1k	ro+seq_10k	ro+seq_128k_Spearman	ro+seq_1k_Spearman	ro+seq_10k_Spearman
H3K122ac
H3K4me1	0.2878	0.3574	0.5202	0.4886	0.6394	0.7768
H3K4me2	0.6474	0.7216	0.7614	0.0868	0.2616	0.5156
H3K4me3	0.6276	0.7017	0.7251	0.0752	0.2382	0.4664
H3K27ac	0.3223	0.3897	0.4283	0.3475	0.5639	0.764
H3K27me3	0.1816	0.1968	0.2406	0.5297	0.6334	0.7245
H3K36me3	0.1985	0.2307	0.2951	0.4665	0.4682	0.5967
H3K9ac	0.4576	0.5281	0.5574	0.4766	0.5999	0.7945
H3K9me3	0.2755	0.3253	0.4138	0.3462	0.4029	0.439
H4K20me1
histone	only_seq_128	only_seq_1k	only_seq_10k	only_seq_128_Spearmanr	only_seq_1k_Spearmanr	only_seq_10k_Spearmanr
H3K122ac
H3K4me1	0.3858	0.454	0.5656	0.5205	0.6578	0.3858
H3K4me2	0.6158	0.7059	0.7219	0.0808	0.2036	0.6158
H3K4me3	0.6084	0.6994	0.7212	0.0785	0.235	0.6083
H3K27ac	0.2437	0.2722	0.2895	0.3332	0.5239	0.2437
H3K27me3	0.1676	0.1805	0.234	0.5465	0.6549	0.1677
H3K36me3	0.2707	0.3047	0.3755	0.4795	0.4852	0.2707
H3K9ac	0.538	0.6368	0.6615	0.4443	0.5504	0.538
H3K9me3	0.2286	0.2391	0.2822	0.2801	0.287	0.2286
H4K20me1
Correlation near Functional Elements
1kb window	K562_RD											dHIT
histone modi	promoter		enhancer		genebody		insulator		polya			histone modi	promoter		enhancer		genebody		insulator		polya
K562	pearson	spearman	pearson	spearman	pearson	spearman	pearson	spearman	pearson	spearman		K562	pearson	spearman	pearson	spearman	pearson	spearman	pearson	spearman	pearson	spearman
H3k122ac	0.5849	0.8362	0.6094	0.738	0.6727	0.4989	0.4444	0.495	0.6233	0.5282		H3k122ac	0.3559	0.5432	0.4128	0.589	0.4864	0.3686	0.3226	0.2208	0.4837	0.3589
H3k4me1	0.7454	0.7988	0.4099	0.77	0.7058	0.5865	0.5332	0.5449	0.6307	0.5825		H3k4me1	0.437	0.5271	0.3997	0.4902	0.5091	0.4739	0.3509	0.3479	0.4924	0.4739
H3k4me2	0.8372	0.8767	0.6757	0.8296	0.9077	0.5525	0.6083	0.4864	0.864	0.5584		H3k4me2	0.4639	0.5402	0.5782	0.6795	0.7277	0.4205	0.4233	0.2089	0.7086	0.4043
H3k4me3	0.834	0.8743	0.444	0.8058	0.9127	0.486	0.5892	0.3533	0.8694	0.4572		H3k4me3	0.4812	0.5513	0.5993	0.662	0.7281	0.36	0.3983	0.161	0.7184	0.3387
H3k27ac	0.7722	0.8754	0.6495	0.8134	0.8312	0.5731	0.5143	0.419	0.7281	0.5847		H3k27ac	0.4437	0.6407	0.4919	0.6765	0.6696	0.3937	0.3383	0.1835	0.5675	0.4039
H3k27me3	0.3724	0.3724	0.0609	0.3634	0.4928	0.4083	0.4634	0.4673	0.4653	0.367		H3k27me3	0.1688	0.2315	0.0792	0.1949	0.2793	0.2924	0.1687	0.2378	0.295	0.2911
H3k36me3	0.7035	0.674	0.0866	0.6424	0.7562	0.7473	0.5664	0.4716	0.7287	0.7325		H3k36me3	0.4224	0.3927	0.3235	0.4196	0.5507	0.6085	0.4127	0.2946	0.5269	0.5693
H3k9ac	0.8303	0.8841	0.582	0.825	0.8936	0.5603	0.618	0.4016	0.8539	0.5281		H3k9ac	0.4927	0.6163	0.5769	0.6801	0.7006	0.3871	0.4047	0.2094	0.6828	0.3717
H3k9me3	0.4545	0.6326	0.1012	0.4863	0.4095	0.5051	0.3943	0.4305	0.3953	0.4589		H3k9me3	0.2934	0.3895	0.0995	0.2454	0.2994	0.2883	0.0964	0.0941	0.2993	0.2637
H4k20me1	0.6203	0.6284	0.0557	0.5422	0.5904	0.5941	0.4947	0.5159	0.5856	0.5718		H4k20me1	0.4254	0.4243	0.3649	0.3315	0.4257	0.3784	0.1423	0.1544	0.4233	0.3831
1kb window												dHIT
histone modi	promoter		enhancer		genebody		insulator		polya			histone modi	promoter		enhancer		genebody		insulator		polya
GM12878	pearson	spearman	pearson	spearman	pearson	spearman	pearson	spearman	pearson	spearman		GM12878	pearson	spearman	pearson	spearman	pearson	spearman	pearson	spearman	pearson	spearman
H3k122ac												H3k122ac
H3k4me1	0.7194	0.7332	0.4508	0.7027	0.6828	0.5424	0.4697	0.4385	0.585	0.4938		H3k4me1	0.4447	0.5115	0.3291	0.3712	0.499	0.4678	0.3559	0.3133	0.4382	0.4035
H3k4me2	0.4756	0.5146	0.5929	0.7184	0.7504	0.5192	0.5272	0.375	0.7656	0.4981		H3k4me2	0.231	0.26	0.5372	0.6086	0.7003	0.4791	0.4495	0.2128	0.6752	0.4023
H3k4me3	0.7953	0.825	0.3527	0.773	0.7648	0.5175	0.2762	0.2958	0.8266	0.463		H3k4me3	0.5607	0.603	0.6081	0.6721	0.4443	0.4335	0.2116	0.1383	0.705	0.3384
H3k27ac	0.565	0.7128	0.5607	0.7487	0.373	0.4864	0.0699	0.2663	0.6914	0.4389		H3k27ac	0.4566	0.6283	0.4603	0.6403	0.1889	0.3914	0.0562	0.1974	0.5855	0.3615
H3k27me3	0.1938	0.3844	0.0313	0.3207	0.2665	0.4301	0.3608	0.4425	0.3937	0.3688		H3k27me3	0.0782	0.2442	0.087	0.1794	0.0881	0.26	0.1283	0.2022	0.2292	0.206
H3k36me3	0.5265	0.5194	0.0793	0.5404	0.612	0.635	0.5299	0.3917	0.6256	0.6465		H3k36me3	0.3313	0.322	0.4308	0.4055	0.5468	0.5856	0.4775	0.3288	0.4917	0.5309
H3k9ac	0.7164	0.7594	0.641	0.7627	0.8415	0.4464	0.5442	0.2518	0.7839	0.4212		H3k9ac	0.5464	0.6218	0.6335	0.7035	0.7008	0.4147	0.4285	0.1568	0.6609	0.3413
H3k9me3	0.2969	0.4456	0.0324	0.3507	0.2626	0.3838	0.2498	0.3045	0.234	0.3237		H3k9me3	0.1737	0.2822	0.093	0.1616	0.1387	0.2186	0.0683	0.0908	0.1431	0.1612
H4k20me1	0.4501	0.4181	0.0568	0.3775	0.4754	0.4659	0.4225	0.4272	0.4663	0.466		H4k20me1	0.3281	0.2965	0.2688	0.2027	0.3448	0.3186	0.1313	0.1317	0.287	0.265
1kb window												dHIT
histone modi	promoter		enhancer		genebody		insulator		polya			histone modi	promoter		enhancer		genebody		insulator		polya
Hct116	pearson	spearman	pearson	spearman	pearson	spearman	pearson	spearman	pearson	spearman		GM12878	pearson	spearman	pearson	spearman	pearson	spearman	pearson	spearman	pearson	spearman
H3k122ac												H3k122ac
H3k4me1	0.6265	0.6865	0.6252	0.6621	0.6786	0.4779			0.6043	0.5155		H3k4me1	0.41	0.4805	0.3418	0.3898	0.5591	0.364			0.4973	0.4157
H3k4me2	0.4098	0.4855	0.6264	0.7174	0.7814	0.431			0.7655	0.4717		H3k4me2	0.3543	0.38	0.6069	0.6701	0.797	0.2957			0.7146	0.345
H3k4me3	0.5908	0.6419	0.6752	0.7259	0.8405	0.4486			0.7728	0.4048		H3k4me3	0.4972	0.5222	0.6053	0.6712	0.781	0.2252			0.643	0.2637
H3k27ac	0.5713	0.6946	0.6882	0.7466	0.7048	0.4229			0.6377	0.5201		H3k27ac	0.4794	0.5711	0.5802	0.6846	0.6488	0.2969			0.6247	0.3811
H3k27me3	0.2608	0.2719	0.2379	0.2249	0.2404	0.2582			0.2111	0.1814		H3k27me3	0.1881	0.2164	0.1117	0.1177	0.1372	0.1075			0.1623	0.1081
H3k36me3	0.4333	0.3839	0.3881	0.335	0.5214	0.526			0.4937	0.5351		H3k36me3	0.3737	0.3201	0.3656	0.2411	0.4877	0.4582			0.4987	0.5062
H3k9ac	0.598	0.6857	0.6691	0.7409	0.7946	0.5173			0.7398	0.5057		H3k9ac	0.5313	0.5873	0.6397	0.7178	0.7669	0.2924			0.6503	0.3295
H3k9me3	0.3625	0.4633	0.2071	0.2992	0.3042	0.3592			0.2215	0.2843		H3k9me3
H4k20me1	0.4063	0.3877	0.2454	0.1961	0.2059	0.2201			0.1559	0.1115		H4k20me1	0.4054	0.3393	0.2787	0.1663	0.306	0.2614			0.3248	0.2699
1kb window												dHIT
histone modi	promoter		enhancer		genebody		insulator		polya			histone modi	promoter		enhancer		genebody		insulator		polya
Hela	pearson	spearman	pearson	spearman	pearson	spearman	pearson	spearman	pearson	spearman		Hela	pearson	spearman	pearson	spearman	pearson	spearman	pearson	spearman	pearson	spearman
H3k122ac												H3k122ac
H3k4me1	0.7296	0.751	0.7321	0.8239	0.6409	0.5108			0.5358	0.4934		H3k4me1	0.3364	0.4134	0.3651	0.4284	0.4446	0.3641			0.4107	0.3867
H3k4me2	0.4003	0.4347	0.4659	0.4828	0.67	0.5236			0.7011	0.4825		H3k4me2	0.1223	0.1394	0.2757	0.3093	0.578	0.3489			0.5835	0.3464
H3k4me3	0.7044	0.7264	0.7502	0.7839	0.8722	0.482			0.8173	0.477		H3k4me3	0.403	0.4318	0.5355	0.6073	0.7506	0.369			0.6286	0.3524
H3k27ac	0.653	0.7038	0.6198	0.6736	0.782	0.6104			0.6577	0.6149		H3k27ac	0.5424	0.608	0.5151	0.594	0.7114	0.3621			0.5687	0.3947
H3k27me3	0.2934	0.3169	0.2775	0.3021	0.2068	0.2501			0.1829	0.1933		H3k27me3	0.1972	0.2252	0.1413	0.1644	0.0692	0.0721			0.0655	0.0532
H3k36me3	0.6092	0.6343	0.5035	0.613	0.5626	0.5814			0.5703	0.5888		H3k36me3	0.2729	0.2659	0.289	0.2683	0.3678	0.3536			0.3964	0.3884
H3k9ac	0.6843	0.7289	0.676	0.7022	0.8237	0.4513			0.7456	0.4754		H3k9ac	0.4963	0.5484	0.5727	0.6447	0.7228	0.3528			0.5887	0.3589
H3k9me3	0.4222	0.4806	0.3641	0.4307	0.3649	0.4595			0.3554	0.391		H3k9me3
H4k20me1	0.4138	0.3875	0.3644	0.334	0.4871	0.5023			0.4302	0.4554		H4k20me1	0.2285	0.2011	0.2046	0.144	0.2876	0.2575			0.2812	0.2599
1kb window	K562_RD											dHIT
histone modi	promoter		enhancer		genebody		insulator		polya			histone modi	promoter		enhancer		genebody		insulator		polya
CD4	pearson	spearman	pearson	spearman	pearson	spearman	pearson	spearman	pearson	spearman		CD4	pearson	spearman	pearson	spearman	pearson	spearman	pearson	spearman	pearson	spearman
H3k122ac												H3k122ac
H3k4me1	0.4466	0.3952	0.4354	0.4652	0.4124	0.4496			0.4428	0.4324		H3k4me1	0.2381	0.2589	0.1578	0.1886	0.3355	0.3303			0.3471	0.3474
H3k4me2												H3k4me2
H3k4me3	0.6124	0.7325	0.6267	0.7463	0.7709	0.3765			0.6991	0.295		H3k4me3	0.2319	0.382	0.4028	0.571	0.6014	0.2203			0.5187	0.2046
H3k27ac												H3k27ac
H3k27me3	0.1318	0.1053	0.1754	0.1592	0.1414	0.1381			0.1475	0.1269		H3k27me3	0.0226	0.0139	0.0574	0.0486	0.068	0.0466			0.097	0.0708
H3k36me3	0.1629	0.0864	0.3076	0.2032	0.2344	0.3081			0.2565	0.3224		H3k36me3	0.0912	0.0395	0.2443	0.163	0.1797	0.2245			0.1889	0.2466
H3k9ac	0.3997	0.5966	0.3894	0.5054	0.4915	0.3169			0.4623	0.2186		H3k9ac	0.1495	0.348	0.2261	0.3733	0.3751	0.1191			0.3248	0.0826
H3k9me3	0.0606	0.0601	0.1102	0.0717	0.0647	0.1083			0.0361	0.0776		H3k9me3
H4k20me1												H4k20me1
												dHIT
histone modi	promoter		enhancer		genebody		insulator		polya			histone modi	promoter		enhancer		genebody		insulator		polya
IMR90												IMR90	pearson	spearman	pearson	spearman	pearson	spearman	pearson	spearman	pearson	spearman
H3k122ac												H3k122ac
H3k4me1	0.5929	0.7169	0.5576	0.6342	0.516	0.3383			0.4241	0.2308		H3k4me1	0.3048	0.5485	0.2051	0.2608	0.309	0.1936			0.239	0.1239
H3k4me2	0.6151	0.6615	0.6599	0.6441	0.7631	0.1049			0.7392	0.0339		H3k4me2	0.3053	0.3548	0.49	0.5291	0.646	0.1593			0.6024	0.126
H3k4me3	0.6119	0.6299	0.6525	0.6041	0.7602	-0.139			0.6758	-0.0365		H3k4me3	0.4873	0.545	0.5698	0.5169	0.7177	-0.0502			0.5647	0.0177
H3k27ac	0.5897	0.6615	0.5827	0.6383	0.6755	0.1248			0.5654	0.1433		H3k27ac	0.512	0.6231	0.455	0.5325	0.5922	0.1545			0.4804	0.1477
H3k27me3	0.0654	0.0614	0.1222	-0.0759	0.2188	-0.0748			0.2261	0.013		H3k27me3	0.0326	0.1772	0.0512	0.0945	0.1326	-0.0696			0.1487	0.0073
H3k36me3	0.2492	0.4071	0.3304	0.2671	0.3891	0.4053			0.4046	0.457		H3k36me3	0.1738	0.3517	0.2944	0.1944	0.3383	0.3672			0.3457	0.4107
H3k9ac	0.6639	0.724	0.6679	0.6283	0.765	0.1857			0.6774	0.2448		H3k9ac	0.4948	0.5913	0.582	0.5785	0.686	0.1552			0.5706	0.1818
H3k9me3	0.0572	0.2075	0.0335	0.0706	0.0311	-0.1083			0.0346	-0.0301		H3k9me3
H4k20me1	0.419	0.4527	0.5118	0.4713	0.4763	0.5166			0.4503	0.5086		H4k20me1	0.3125	0.3741	0.3598	0.3248	0.3464	0.3469			0.3217	0.3448
												dHIT
histone modi	promoter		enhancer		genebody		insulator		polya			histone modi	promoter		enhancer		genebody		insulator		polya
MCF7												MCF7	pearson	spearman	pearson	spearman	pearson	spearman	pearson	spearman	pearson	spearman
H3k122ac												H3k122ac
H3k4me1	0.5495	0.7366	0.5369	0.6365	0.5198	0.4426			0.432	0.447		H3k4me1	0.2859	0.4952	0.261	0.3539	0.379	0.3216			0.3028	0.3623
H3k4me2	0.386	0.4616	0.5816	0.6348	0.7192	0.3956			0.6894	0.4494		H3k4me2	0.2151	0.2648	0.4948	0.5616	0.6821	0.2783			0.6265	0.3452
H3k4me3	0.6723	0.7168	0.6919	0.6494	0.8443	0.3819			0.7843	0.3718		H3k4me3	0.4489	0.4982	0.5716	0.569	0.758	0.2121			0.6692	0.261
H3k27ac	0.5445	0.5949	0.4288	0.4829	0.4986	0.2431			0.4869	0.2092		H3k27ac	0.3517	0.4349	0.2728	0.3627	0.3994	0.1646			0.4115	0.1478
H3k27me3	0.0888	0.1705	0.0791	0.0433	0.0737	-0.0144			0.1013	0.0361		H3k27me3	0.0166	0.0606	0.0237	0.0506	0.0447	-0.0034			0.063	0.0112
H3k36me3	0.3345	0.2982	0.3387	0.2808	0.4836	0.5189			0.5116	0.5407		H3k36me3	0.2387	0.2616	0.2753	0.2792	0.3809	0.4434			0.3944	0.491
H3k9ac	0.6614	0.7317	0.6101	0.5937	0.7719	0.376			0.7447	0.3765		H3k9ac	0.5288	0.6154	0.543	0.5724	0.7043	0.2519			0.6219	0.2968
H3k9me3	0.177	0.3259	0.1001	0.1701	0.1092	0.1523			0.0866	0.1465		H3k9me3
H4k20me1	0.4067	0.469	0.3945	0.3877	0.39	0.4777			0.375	0.4346		H4k20me1	0.3274	0.3825	0.3158	0.258	0.3369	0.3521			0.354	0.3531
												dHIT
histone modi	promoter		enhancer		genebody		insulator		polya			histone modi	promoter		enhancer		genebody		insulator		polya
HepG2												HepG2	pearson	spearman	pearson	spearman	pearson	spearman	pearson	spearman	pearson	spearman
H3k122ac												H3k122ac
H3k4me1	0.5518	0.6929	0.4853	0.5543	0.4268	0.4041	0.2566	0.4374	0.3214	0.3924		H3k4me1	0.2885	0.4262	0.4028	0.4959	0.3592	0.3168	0.1705	0.0622	0.276	0.3347
H3k4me2	0.5189	0.5714	0.5999	0.577	0.6844	0.1242	0.1645	0.1398	0.52	0.1819		H3k4me2	0.2279	0.2962	0.5072	0.5207	0.5794	0.185	0.1294	-0.0273	0.5076	0.2014
H3k4me3	0.4749	0.5138	0.5712	0.5674	0.6694	0.0685	0.2165	0.0476	0.5018	0.1598		H3k4me3	0.3764	0.445	0.4937	0.5285	0.6543	0.1477	0.1987	-0.0339	0.4816	0.1914
H3k27ac	0.6196	0.7259	0.5188	0.6097	0.5867	0.2931	0.1997	0.1095	0.4308	0.3085		H3k27ac	0.4597	0.6226	0.5273	0.6092	0.5501	0.23	0.2082	0.0453	0.4153	0.2778
H3k27me3	0.411	0.4614	0.2337	0.1593	0.2505	-0.0451	0.3393	0.343	0.2172	0.0136		H3k27me3	0.2102	0.2579	0.1223	0.1379	0.1891	0.078	0.1894	0.3064	0.1361	0.0581
H3k36me3	0.1762	-0.0501	0.3556	0.1478	0.3698	0.371	0.3414	0.0984	0.4017	0.3985		H3k36me3	0.1868	0.0892	0.3285	0.2164	0.3255	0.3767	0.3466	0.1732	0.3194	0.38
H3k9ac	0.6204	0.6972	0.6178	0.6151	0.7284	0.2838	0.2801	0.1341	0.55	0.2814		H3k9ac	0.444	0.5611	0.5336	0.5785	0.6483	0.2155	0.2463	0.0141	0.4714	0.2482
H3k9me3	0.0605	0.2087	0.0028	-0.0005	0.038	0.1593	0.0312	0.0928	0.0227	0.1013		H3k9me3
H4k20me1	0.2788	0.2169	0.2872	0.0779	0.3268	0.2676	0.1884	0.1327	0.3207	0.2457		H4k20me1	0.3061	0.2693	0.303	0.1045	0.3239	0.266	0.149	0.1088	0.2961	0.2557
												dHIT
histone modi	promoter		enhancer		genebody		insulator		polya			histone modi	promoter		enhancer		genebody		insulator		polya
Mouse												Mouse	pearson	spearman	pearson	spearman	pearson	spearman	pearson	spearman	pearson	spearman
H3k122ac												H3k122ac
H3k4me1	0.2284	0.1932	0.3317	0.4522	0.1962	0.3526			0.2032	0.3859		H3k4me1	0.084	0.0932	0.0087	0.0672	0.0472	-0.0103			0.0711	0.0041
H3k4me2	0.0799	0.1078	0.3267	0.4423	0.4557	0.398			0.4257	0.4307		H3k4me2	-0.126	-0.1621	-0.0117	0.0742	0.1766	-0.0163			0.1679	-0.0077
H3k4me3	0.4294	0.4517	0.518	0.5779	0.6786	0.1408			0.5021	0.2027		H3k4me3	0.036	-0.025	0.1792	0.1931	0.121	0.018			0.1397	0.0356
H3k27ac	0.3868	0.4698	0.4628	0.544	0.4025	0.3221			0.5103	0.3275		H3k27ac	0.3367	0.2202	0.2071	0.2209	0.0661	-0.06			0.2837	-0.0553
H3k27me3	0.0147	-0.0206	-0.064	0.0572	0.1046	0.2974			0.1074	0.2629		H3k27me3	0.0261	0.0029	0.0784	0.0334	0.0205	0.0501			0.0417	0.0759
H3k36me3	0.0476	-0.0295	0.2559	0.1181	0.2619	0.346			0.2798	0.3052		H3k36me3	0.0644	0.0515	0.2066	0.1284	-0.0585	-0.1438			-0.0445	-0.1121
H3k9ac	0.2114	0.3322	0.3448	0.4948	0.5328	0.2865			0.4231	0.2087		H3k9ac	0.1172	0.0421	0.1887	0.1838	0.0891	-0.0729			0.1688	-0.0669
H3k9me3	-0.0203	-0.0213	-0.0364	-0.0224	0.0723	0.127			0.0861	0.0968		H3k9me3
H4k20me1												H4k20me1
Correlation based TSS
1kb window	K562_RD									dHIT
histone modi	1k		1k-10k		10k-30k		30k++			histone modi	1k		1k-10k		10k-30k		30k++
K562	pearson	spearman	pearson	spearman	pearson	spearman	pearson	spearman		K562	pearson	spearman	pearson	spearman	pearson	spearman	pearson	spearman
H3k122ac	0.6014	0.8283	0.6195	0.5897	0.6411	0.584	0.5714	0.5589		H3k122ac	0.3917	0.6127	0.4453	0.404	0.4603	0.4082	0.4111	0.3622
H3k4me1	0.6905	0.7366	0.5865	0.5866	0.56	0.5282	0.3232	0.5069		H3k4me1	0.3908	0.4476	0.2574	0.2763	0.3497	0.3152	0.3366	0.3031
H3k4me2	0.8628	0.8866	0.8011	0.6635	0.7683	0.6668	0.5793	0.6628		H3k4me2	0.5169	0.5998	0.5549	0.4923	0.5908	0.525	0.5085	0.4786
H3k4me3	0.8609	0.8857	0.7994	0.6354	0.7968	0.6332	0.4648	0.6199		H3k4me3	0.5417	0.6134	0.5188	0.4703	0.6052	0.5219	0.5065	0.4906
H3k27ac	0.7923	0.8594	0.73	0.6189	0.6495	0.6369	0.53	0.6477		H3k27ac	0.4693	0.6437	0.4612	0.4371	0.4439	0.516	0.4177	0.5042
H3k27me3	0.427	0.4468	0.3045	0.4279	0.3941	0.4507	0.1164	0.4355		H3k27me3	0.0951	0.1248	0.059	0.1259	0.0384	0.0969	0.036	0.0883
H3k36me3	0.7236	0.7	0.6382	0.6437	0.6293	0.6264	0.1256	0.5866		H3k36me3	0.4378	0.4449	0.3003	0.3188	0.3059	0.3139	0.2626	0.309
H3k9ac	0.8507	0.8959	0.8002	0.6235	0.7744	0.6485	0.4292	0.6521		H3k9ac	0.5421	0.6775	0.5084	0.4547	0.5618	0.53	0.4671	0.5187
H3k9me3	0.4104	0.5107	0.4018	0.4332	0.3771	0.4549	0.1864	0.4472		H3k9me3	0.2873	0.3178	0.1429	0.234	0.1315	0.1578	0.0803	0.1854
H4k20me1	0.6134	0.6038	0.4909	0.5368	0.4741	0.5278	0.0645	0.4762		H4k20me1	0.3987	0.3779	0.2748	0.2992	0.2819	0.3021	0.1704	0.1998
1kb window										dHIT
histone modi	1k		1k-10k		10k-30k		30k++			histone modi	1k		1k-10k		10k-30k		30k++
GM12878	pearson	spearman	pearson	spearman	pearson	spearman	pearson	spearman		GM12878	pearson	spearman	pearson	spearman	pearson	spearman	pearson	spearman
H3k122ac										H3k122ac
H3k4me1	0.6103	0.6416	0.515	0.5102	0.5154	0.4591	0.3235	0.4055		H3k4me1	0.3622	0.4251	0.2201	0.2462	0.3448	0.3102	0.3233	0.2817
H3k4me2	0.5501	0.6165	0.614	0.5892	0.6404	0.5818	0.4206	0.5376		H3k4me2	0.3924	0.4593	0.4919	0.4781	0.5854	0.513	0.4693	0.45
H3k4me3	0.8372	0.8425	0.1566	0.5634	0.4548	0.5605	0.0448	0.5111		H3k4me3	0.6485	0.691	0.1197	0.458	0.3653	0.4901	0.0301	0.4386
H3k27ac	0.3261	0.7053	0.0447	0.5084	0.093	0.5602	0.1215	0.5377		H3k27ac	0.2564	0.6073	0.0334	0.4505	0.0733	0.5163	0.1038	0.4832
H3k27me3	0.2438	0.3601	0.1093	0.3764	0.1259	0.413	0.0433	0.3803		H3k27me3	0.0281	0.0777	0.0039	0.0571	-0.008	0.048	0.012	0.1075
H3k36me3	0.5922	0.5841	0.5107	0.5242	0.4598	0.4819	0.0556	0.4168		H3k36me3	0.4504	0.4721	0.3825	0.4012	0.3179	0.3355	0.2019	0.315
H3k9ac	0.7339	0.782	0.6831	0.5572	0.7018	0.5951	0.3078	0.5323		H3k9ac	0.5669	0.65	0.5457	0.4979	0.6055	0.5605	0.443	0.5066
H3k9me3	0.1984	0.2785	0.133	0.2942	0.2225	0.3602	0.1447	0.3288		H3k9me3	0.1146	0.1788	0.0495	0.1594	0.0967	0.1607	0.0422	0.0982
H4k20me1	0.4566	0.4641	0.43	0.4759	0.3744	0.4444	0.0587	0.3609		H4k20me1	0.2963	0.3254	0.2852	0.3394	0.2517	0.2931	0.0974	0.1564
1kb window										dHIT
histone modi	1k		1k-10k		10k-30k		30k++			histone modi	1k		1k-10k		10k-30k		30k++
HCT116	pearson	spearman	pearson	spearman	pearson	spearman	pearson	spearman		HCT116	pearson	spearman	pearson	spearman	pearson	spearman	pearson	spearman
H3k122ac										H3k122ac
H3k4me1	0.5288	0.5828	0.4967	0.4859	0.5417	0.4735	0.57	0.4784		H3k4me1	0.2325	0.2749	0.2277	0.2687	0.3914	0.3348	0.4379	0.4379
H3k4me2	0.4344	0.5288	0.6884	0.5996	0.6881	0.6073	0.6561	0.5995		H3k4me2	0.3874	0.4193	0.6042	0.4727	0.6647	0.5184	0.6455	0.6455
H3k4me3	0.5908	0.6423	0.6686	0.6325	0.6927	0.6423	0.6036	0.5867		H3k4me3	0.4911	0.5143	0.5095	0.4883	0.5801	0.5512	0.537	0.537
H3k27ac	0.5345	0.6349	0.5824	0.4797	0.6308	0.5096	0.6805	0.5586		H3k27ac	0.4335	0.5032	0.4249	0.3388	0.5708	0.3649	0.5835	0.5835
H3k27me3	0.293	0.3183	0.239	0.259	0.2233	0.2444	0.1809	0.1985		H3k27me3	0.1139	0.1286	0.062	0.0617	0.0463	0.0478	0.0139	0.0139
H3k36me3	0.6023	0.5796	0.3755	0.3883	0.3726	0.411	0.3464	0.3963		H3k36me3	0.5763	0.5727	0.2602	0.2475	0.2593	0.2514	0.2654	0.2654
H3k9ac	0.6069	0.698	0.6355	0.6075	0.662	0.6222	0.6346	0.6182		H3k9ac	0.5295	0.585	0.5247	0.5034	0.6005	0.5473	0.5822	0.5822
H3k9me3	0.3243	0.3761	0.2725	0.326	0.3002	0.3561	0.2243	0.3674		H3k9me3
H4k20me1	0.4839	0.4581	0.3371	0.3525	0.312	0.3502	0.284	0.3128		H4k20me1	0.4644	0.4243	0.2893	0.2742	0.2767	0.2659	0.251	0.251
1kb window										dHIT
histone modi	1k		1k-10k		10k-30k		30k++			histone modi	1k		1k-10k		10k-30k		30k++
HeLa	pearson	spearman	pearson	spearman	pearson	spearman	pearson	spearman		HeLa	pearson	spearman	pearson	spearman	pearson	spearman	pearson	spearman
H3k122ac										H3k122ac
H3k4me1	0.6153	0.6499	0.5261	0.5144	0.5184	0.4442	0.1958	0.2671		H3k4me1	0.2991	0.3267	0.1983	0.1981	0.2698	0.2052	0.1048	0.1336
H3k4me2	0.4147	0.4764	0.6449	0.5889	0.6455	0.5907	0.2868	0.4951		H3k4me2	0.214	0.3285	0.4686	0.4116	0.5142	0.4273	0.2367	0.3258
H3k4me3	0.7286	0.7588	0.7855	0.6418	0.7704	0.6711	0.5069	0.6318		H3k4me3	0.4627	0.5252	0.5252	0.4716	0.5774	0.5303	0.3965	0.4856
H3k27ac	0.6687	0.7391	0.6227	0.5568	0.6963	0.6118	0.5716	0.573		H3k27ac	0.5681	0.6466	0.5515	0.3993	0.6164	0.4979	0.5256	0.4505
H3k27me3	0.2319	0.269	0.2141	0.3042	0.3408	0.3837	0.0463	0.3052		H3k27me3	0.1481	0.1533	-0.0038	-0.0149	0.1012	0.1128	-0.0115	0.0479
H3k36me3	0.6236	0.6503	0.5225	0.5345	0.5309	0.5541	0.0818	0.4707		H3k36me3	0.47	0.4628	0.3376	0.3278	0.3043	0.2845	0.0046	0.2387
H3k9ac	0.7162	0.7904	0.6936	0.5534	0.7418	0.68	0.5842	0.6301		H3k9ac	0.5493	0.6439	0.5318	0.4068	0.6381	0.5685	0.5146	0.5419
H3k9me3	0.4214	0.469	0.3225	0.4472	0.5187	0.4891	0.1492	0.4425		H3k9me3
H4k20me1	0.5131	0.533	0.4404	0.4736	0.4222	0.4591	0.0943	0.3169		H4k20me1	0.3525	0.326	0.2593	0.2708	0.2323	0.2366	0.0214	0.0456
1kb window										dHIT
histone modi	1k		1k-10k		10k-30k		30k++			histone modi	1k		1k-10k		10k-30k		30k++
CD4	pearson	spearman	pearson	spearman	pearson	spearman	pearson	spearman		CD4	pearson	spearman	pearson	spearman	pearson	spearman	pearson	spearman
H3k122ac										H3k122ac
H3k4me1	0.4262	0.5153	0.2622	0.3202	0.1819	0.3069	0.1718	0.2861		H3k4me1	0.2041	0.2433	0.12	0.1565	0.0888	0.1305	0.0735	0.1194
H3k4me2										H3k4me2
H3k4me3	0.6041	0.6989	0.5737	0.5571	0.5982	0.5523	0.5495	0.5082		H3k4me3	0.2557	0.3992	0.3358	0.4122	0.3786	0.4064	0.3582	0.3499
H3k27ac										H3k27ac
H3k27me3	0.3994	0.5024	0.3288	0.3977	0.3572	0.4116	0.1742	0.3223		H3k27me3	0.2109	0.2357	0.1427	0.1709	0.1216	0.1392	0.0165	0.0366
H3k36me3	0.2579	0.3306	0.1727	0.3193	0.1718	0.3226	0.1512	0.3283		H3k36me3	0.1952	0.2431	0.0772	0.1469	0.0679	0.1225	0.057	0.1232
H3k9ac	0.372	0.5845	0.2767	0.4454	0.3572	0.4467	0.2394	0.4261		H3k9ac	0.1059	0.2929	0.1354	0.2846	0.1718	0.3106	0.1439	0.3181
H3k9me3										H3k9me3
H4k20me1										H4k20me1
1kb window										dHIT
histone modi	1k		1k-10k		10k-30k		30k++			histone modi	1k		1k-10k		10k-30k		30k++
IMR90	pearson	spearman	pearson	spearman	pearson	spearman	pearson	spearman		IMR90	pearson	spearman	pearson	spearman	pearson	spearman	pearson	spearman
H3k122ac										H3k122ac
H3k4me1	0.4743	0.5795	0.4449	0.5001	0.415	0.4038	0.4005	0.3797		H3k4me1	0.2119	0.2718	0.1479	0.1831	0.2243	0.2034	0.2215	0.188
H3k4me2	0.6206	0.6572	0.6835	0.6497	0.5952	0.4779	0.5234	0.4329		H3k4me2	0.3536	0.3995	0.4852	0.5097	0.4506	0.3535	0.3966	0.2973
H3k4me3	0.6183	0.6379	0.5389	0.5519	0.6135	0.5696	0.6037	0.4888		H3k4me3	0.4851	0.5406	0.4596	0.4775	0.5093	0.4816	0.5281	0.4162
H3k27ac	0.5802	0.6433	0.5328	0.5466	0.5505	0.4773	0.5158	0.4666		H3k27ac	0.4851	0.575	0.4324	0.4545	0.4224	0.3636	0.4004	0.3525
H3k27me3	0.2923	0.3362	0.2955	0.3848	0.3408	0.4539	0.3677	0.4489		H3k27me3	0.1582	0.1612	0.0854	0.0922	0.036	0.0435	0.0505	0.0493
H3k36me3	0.4537	0.3639	0.3306	0.3182	0.3302	0.3347	0.3417	0.349		H3k36me3	0.2894	0.2684	0.2476	0.2361	0.236	0.2424	0.216	0.2226
H3k9ac	0.6592	0.7175	0.6052	0.5952	0.6205	0.5054	0.5878	0.4766		H3k9ac	0.4836	0.5663	0.4987	0.5162	0.5003	0.4228	0.4934	0.4039
H3k9me3	0.3485	0.4089	0.2444	0.2943	0.2156	0.2568	0.1805	0.1678		H3k9me3
H4k20me1	0.5645	0.5984	0.4526	0.5163	0.4272	0.4976	0.4283	0.5101		H4k20me1	0.4375	0.4872	0.3072	0.3525	0.2937	0.3362	0.2722	0.306
1kb window										dHIT
histone modi	1k		1k-10k		10k-30k		30k++			histone modi	1k		1k-10k		10k-30k		30k++
MCF7	pearson	spearman	pearson	spearman	pearson	spearman	pearson	spearman		MCF7	pearson	spearman	pearson	spearman	pearson	spearman	pearson	spearman
H3k122ac										H3k122ac
H3k4me1	0.4197	0.5697	0.4958	0.5339	0.5274	0.4627	0.5395	0.4627		H3k4me1	0.159	0.268	0.1729	0.2238	0.2666	0.2177	0.2957	0.224
H3k4me2	0.4068	0.6987	0.7275	0.5654	0.6915	0.4287	0.6574	0.341		H3k4me2	0.2863	0.3459	0.517	0.3839	0.5124	0.3986	0.4657	0.3443
H3k4me3	0.6799	0.7152	0.6003	0.6152	0.6646	0.4689	0.6946	0.3283		H3k4me3	0.4735	0.5269	0.5146	0.4786	0.5173	0.4563	0.4819	0.3941
H3k27ac	0.4587	0.7294	0.6475	0.7768	0.6733	0.5526	0.6683	0.387		H3k27ac	0.2922	0.3634	0.1861	0.1961	0.2051	0.2094	0.2168	0.197
H3k27me3	0.1108	0.5837	0.5169	0.5045	0.4884	0.5512	0.4229	0.3609		H3k27me3	0.0544	0.04	0.0126	0.0093	0.0123	0.0128	0.0143	0.0057
H3k36me3	0.6053	0.5831	0.3274	0.3674	0.3537	0.3984	0.3866	0.4589		H3k36me3	0.4201	0.4447	0.2706	0.2545	0.2189	0.2233	0.184	0.196
H3k9ac	0.6559	0.7878	0.669	0.5747	0.7157	0.4976	0.7112	0.4527		H3k9ac	0.5224	0.6111	0.4667	0.3681	0.5203	0.3733	0.4765	0.3367
H3k9me3	0.2079	0.177	0.1669	0.1507	0.1532	0.1815	0.1235	0.1942		H3k9me3
H4k20me1	0.4676	0.6067	0.484	0.5436	0.4714	0.5125	0.463	0.5296		H4k20me1	0.3853	0.4274	0.252	0.2441	0.2269	0.2281	0.1775	0.1823
1kb window										dHIT
histone modi	1k		1k-10k		10k-30k		30k++			histone modi	1k		1k-10k		10k-30k		30k++
HepG2	pearson	spearman	pearson	spearman	pearson	spearman	pearson	spearman		HepG2	pearson	spearman	pearson	spearman	pearson	spearman	pearson	spearman
H3k122ac										H3k122ac
H3k4me1	0.4381	0.52	0.4026	0.4471	0.3958	0.3832	0.4252	0.3499		H3k4me1	0.2111	0.2527	0.1896	0.2087	0.2797	0.2081	0.348	0.2138
H3k4me2	0.4934	0.5219	0.5318	0.4466	0.5054	0.4387	0.4516	0.4263		H3k4me2	0.2133	0.2536	0.4059	0.3456	0.4173	0.3067	0.359	0.2509
H3k4me3	0.4721	0.5141	0.4619	0.4262	0.5214	0.4502	0.4499	0.3824		H3k4me3	0.3632	0.4309	0.3976	0.3675	0.4167	0.3591	0.3343	0.2731
H3k27ac	0.5802	0.6505	0.4532	0.4546	0.458	0.4488	0.485	0.4391		H3k27ac	0.4212	0.5168	0.4064	0.3928	0.467	0.3851	0.4981	0.3989
H3k27me3	0.4308	0.4941	0.3371	0.3911	0.3706	0.4282	0.326	0.3449		H3k27me3	0.2052	0.2547	0.1068	0.1288	0.0359	0.0363	0.0274	0.0262
H3k36me3	0.3711	0.4087	0.3177	0.337	0.3179	0.3317	0.3001	0.3093		H3k36me3	0.1714	0.2171	0.1678	0.1814	0.1699	0.1859	0.1598	0.1686
H3k9ac	0.6194	0.6857	0.5384	0.4926	0.5732	0.5156	0.5442	0.497		H3k9ac	0.4365	0.5342	0.4446	0.4277	0.4648	0.4526	0.4547	0.4495
H3k9me3	0.1888	0.1562	0.1958	0.2746	0.2288	0.3169	0.3069	0.4214		H3k9me3
H4k20me1	0.3833	0.4753	0.2955	0.328	0.2614	0.2876	0.2752	0.296		H4k20me1	0.4316	0.5048	0.2556	0.2684	0.2255	0.2489	0.2196	0.2308
1kb window										dHIT
histone modi	1k		1k-10k		10k-30k		30k++			histone modi	1k		1k-10k		10k-30k		30k++
mm10 liver	pearson	spearman	pearson	spearman	pearson	spearman	pearson	spearman		HepG2	pearson	spearman	pearson	spearman	pearson	spearman	pearson	spearman
H3k122ac										H3k122ac
H3k4me1	0.0471	0.0468	0.0187	0.1076	0.0965	0.1602	0.1172	0.1782		H3k4me1	0.0573	0.0448	0.0021	0.0066	0.0345	0.0166	0.0262	0.0019
H3k4me2	0.1956	0.4661	0.4309	0.4639	0.4396	0.4476	0.3923	0.4448		H3k4me2	0.0304	0.0984	0.1659	0.0668	0.1413	0.0543	0.0978	0.0069
H3k4me3	0.5041	0.571	0.5519	0.4635	0.5446	0.4504	0.5029	0.4128		H3k4me3	0.096	-0.0068	0.1602	0.0925	0.1138	0.0279	0.126	-0.0141
H3k27ac	0.4232	0.4558	0.3767	0.4157	0.3908	0.3883	0.3486	0.3836		H3k27ac	0.2417	-0.0104	0.0886	-0.017	0.034	-0.0308	-0.0076	-0.0598
H3k27me3	-0.0892	-0.0494	0.1092	0.1935	0.0793	0.1897	0.0337	0.1585		H3k27me3	0.0621	0.0644	0.0046	0.0031	0.0195	0.0152	0.0108	0.0112
H3k36me3	0.1424	0.1575	0.2267	0.2287	0.305	0.3406	0.3179	0.3967		H3k36me3	0.0502	0.027	0.0415	-0.0024	0.0265	-0.0009	-0.0363	-0.0497
H3k9ac	0.3722	0.4454	0.4379	0.3092	0.4454	0.3148	0.402	0.2989		H3k9ac	0.0855	-0.0348	0.1347	0.0306	0.0979	0.0096	0.0854	-0.0313
H3k9me3	0.1514	0.1999	0.0796	0.1233	0.2196	0.2467	0.1071	0.1422		H3k9me3
H4k20me1										H4k20me1
MSE
128bp	RD
histone modi	mseGlobal				mseGene				mseProm 1k				mseEnh 1k				mseObs				mseImp
K562	dHIT2	dHIT	dHIT_R	dHIT_D	dHIT2	dHIT	dHIT_R	dHIT_D	dHIT2	dHIT	dHIT_R	dHIT_D	dHIT2	dHIT	dHIT_R	dHIT_D	dHIT2	dHIT	dHIT_R	dHIT_D	dHIT2	dHIT	dHIT_R	dHIT_D
H3k122ac	0.07893		0.09966	0.21596	0.13		0.17	0.34	1.03		2.21	2.12	1.12		1.64	2.55	2.15		2.76	4.71	1.64		2.5	4.14
H3k4me1	0.53579		0.61593	0.92551	0.71		0.83	1.07	0.64		1.22	0.83	0.62		1.02	2.17	1.33		2.12	4.38	0.52		0.88	1.57
H3k4me2	0.4284		0.515	0.65041	0.56		0.7	0.83	0.27		0.52	0.98	0.69		1.04	2.86	0.64		1.14	3.07	0.37		0.67	3.14
H3k4me3	0.58115		0.63557	0.66396	0.57		0.6	0.76	0.27		0.49	0.97	0.62		0.86	2.26	0.6		1.04	2.57	0.35		0.61	2.76
H3k27ac	0.47413		0.56736	0.67854	0.6		0.71	0.85	0.48		0.82	1.55	0.84		1.14	3.3	0.99		1.47	4.98	0.64		0.96	3.34
H3k27me3	0.58062		0.68556	0.64666	0.65		0.69	0.79	0.71		0.74	0.68	0.68		0.74	0.81	1.84		3.6	2.42	0.67		0.91	0.98
H3k36me3	0.54633		0.63936	0.69286	0.5		0.62	0.81	0.53		0.78	0.55	0.54		0.67	0.73	0.7		1.56	2.77	0.3		0.52	1.04
H3k9ac	0.54166		0.58732	0.77893	0.55		0.62	0.81	0.36		0.6	1.35	0.62		0.85	2.6	0.65		1.01	3.39	0.43		0.69	3.39
H3k9me3	0.44912		0.80552	0.58669	0.46		0.59	0.55	0.51		0.66	0.49	0.49		0.62	0.53	2.19		3.63	2.7	0.56		0.61	0.87
H4k20me1	0.49696		0.60345	0.56785	0.51		0.63	0.58	0.52		0.65	0.69	0.55		0.66	0.66	1.52		2.69	2.12	0.55		0.69	0.81
histone modi	mseGlobal				mseGene				mseProm 1k				mseEnh 1k				mseObs				mseImp
GM12878	dHIT2	dHIT	dHIT_R	dHIT_D	dHIT2	dHIT	dHIT_R	dHIT_D	dHIT2	dHIT	dHIT_R	dHIT_D	dHIT2	dHIT	dHIT_R	dHIT_D	dHIT2	dHIT	dHIT_R	dHIT_D	dHIT2	dHIT	dHIT_R	dHIT_D
H3k122ac
H3k4me1	0.69995		0.75264	0.98616	1		1.1	1.17	0.8		1.2	1.11	0.87		1.08	1.86	0.89		1.46	3.5	1.23		1.3	2.04
H3k4me2	0.45727		0.50022	0.76433	0.77		0.87	1.02	2.59		2.73	2.31	1.36		1.67	2.85	1.16		1.26	2.98	2.16		2.32	3.75
H3k4me3	0.77989		0.86543	0.58194	0.65		0.73	0.72	0.55		0.64	0.92	0.8		1.08	2.4	1.2		1.92	2.8	0.69		0.96	2.05
H3k27ac	0.49989		0.5035	0.85774	0.87		0.91	1.11	1.76		2.01	1.72	1.85		1.86	4.11	1.31		1.42	5.95	1.93		1.99	4.06
H3k27me3	1.61035		1.63923	0.86339	1.23		1.15	0.58	1.09		1.11	0.56	1.05		1.13	0.54	3.79		6.29	3.91	0.57		0.76	0.6
H3k36me3	0.5559		0.6144	0.68877	0.57		0.65	0.79	0.76		0.95	0.89	0.88		0.74	0.79	0.78		1.46	2.29	0.6		0.7	1.15
H3k9ac	0.64069		0.67456	0.9416	1.04		1.1	1.08	1.61		1.85	1.45	2.34		2.46	1.84	1.18		1.41	2.26	2.34		2.6	3.93
H3k9me3	0.72555		1.02726	0.965	0.83		0.89	0.94	0.71		0.76	0.62	0.74		0.72	0.59	2.85		4.07	3.3	1.12		1	1.44
H4k20me1	0.5573		0.66158	0.64514	0.62		0.78	0.67	1.2		1.43	1.6	0.9		0.98	1.03	0.94		1.8	0.88	1.25		1.68	1.43
histone modi	mseGlobal				mseGene				mseProm 1k				mseEnh 1k				mseObs				mseImp
hct116	dHIT2	dHIT	dHIT_R	dHIT_D	dHIT2	dHIT	dHIT_R	dHIT_D	dHIT2	dHIT	dHIT_R	dHIT_D	dHIT2	dHIT	dHIT_R	dHIT_D	dHIT2	dHIT	dHIT_R	dHIT_D	dHIT2	dHIT	dHIT_R	dHIT_D
H3k122ac
H3k4me1	0.39357		0.46601	1.03656	0.58		0.76	1.36	1.23		3.38	1.27	1.47		2.26	0.94	0.87		0.85	0.97	2.17		3.04	3.28
H3k4me2	0.24475		0.24022	0.63358	0.34		0.35	0.82	1.22		1.26	1.67	1.09		1.24	1.81	0.79		0.8	1.61	1.5		1.39	4.95
H3k4me3	0.29873		0.3367	0.67395	0.32		0.4	0.89	0.78		0.75	1.23	1.71		1.91	0.92	0.61		0.6	1.03	1.73		1.66	4.65
H3k27ac	0.307		0.32237	0.65898	0.45		0.5	0.8	1.91		2.92	2.79	1.71		2.26	2.02	1.32		1.38	2.58	2.48		3	5.6
H3k27me3	0.60426		0.5834	0.73413	0.74		0.65	1.08	0.55		0.56	1.2	0.73		0.66	1.5	0.87		1.23	0.39	3.24		1.58	2.25
H3k36me3	0.31767		0.34738	0.6799	0.37		0.36	0.76	0.44		0.83	1.13	0.69		0.95	1.11	0.65		0.79	0.23	1.14		0.99	2.27
H3k9ac	0.29849		0.34271	0.9379	0.38		0.44	1.14	1.52		1.5	2.32	2.09		2.23	1.17	1.22		1.05	1.46	2.51		2.27	5.99
H3k9me3	1.13237		1.5079	1.83386	1.39		1.83	2.04	1.66		2.49	2.46	2.42		2.91	2.26	0.16		0.1	0.04	4.05		3.68	3.02
H4k20me1	0.53873		0.38905	0.88188	0.56		0.34	0.91	0.84		0.78	2.24	0.93		0.86	1.55	0.56		0.49	0.19	2.74		1.14	2.93
histone modi	mseGlobal				mseGene				mseProm 1k				mseEnh 1k				mseObs				mseImp
hela	dHIT2	dHIT	dHIT_R	dHIT_D	dHIT2	dHIT	dHIT_R	dHIT_D	dHIT2	dHIT	dHIT_R	dHIT_D	dHIT2	dHIT	dHIT_R	dHIT_D	dHIT2	dHIT	dHIT_R	dHIT_D	dHIT2	dHIT	dHIT_R	dHIT_D
H3k122ac
H3k4me1	1.3104		1.4884	0.85232	1		1.21	1.06	0.79		1.58	0.91	0.71		1.46	2.58	5.07		7.17	6.07	0.81		1.36	1.55
H3k4me2	2.21133		2.39946	1.12529	2.6		2.92	1.5	1.09		1.29	1.84	1.1		1.25	4.72	4.32		6.22	5.49	1.03		1.39	2.99
H3k4me3	1.08525		1.21439	0.60758	1.1		1.2	0.83	0.85		1.44	1.65	0.9		1.31	2.99	2.77		4.82	3.18	1.04		1.51	2.55
H3k27ac	0.98848		1.16367	0.61924	1.28		1.68	0.99	1.88		2.61	2.87	2.31		3.18	6.98	5.17		6.88	8.1	1.8		2.56	3.15
H3k27me3	2.02297		2.51195	0.86782	1.35		1.28	0.5	0.97		0.88	0.49	0.82		0.75	0.5	6.74		12.17	4.31	0.69		0.67	0.76
H3k36me3	2.47011		2.74516	0.87354	2.43		2.92	2.18	0.68		0.89	0.53	0.77		1.05	0.65	4.3		6.68	4.39	1.22		1.8	0.96
H3k9ac	1.11401		1.2316	0.71971	1.01		1.11	0.89	1.26		2.02	2.12	1.27		1.77	3.5	2.79		4.45	3.55	1.27		1.73	2.95
H3k9me3	0.5356		0.87521	0.81289	0.51		0.61	0.58	0.63		0.79	0.79	0.69		0.81	0.75	2.88		3.85	2.76	0.61		0.8	1.05
H4k20me1	1.02371		1.35451	0.75422	0.89		1.22	0.85	0.99		1.01	1.77	0.88		0.88	1.43	4.37		7.77	3.29	1.08		1.09	1.37
histone modi	mseGlobal				mseGene				mseProm 1k				mseEnh 1k				mseObs				mseImp
cd4	dHIT2	dHIT	dHIT_R	dHIT_D	dHIT2	dHIT	dHIT_R	dHIT_D	dHIT2	dHIT	dHIT_R	dHIT_D	dHIT2	dHIT	dHIT_R	dHIT_D	dHIT2	dHIT	dHIT_R	dHIT_D	dHIT2	dHIT	dHIT_R	dHIT_D
H3k122ac
H3k4me1	0.30979		0.33374	1.52609	0.73		0.85	1.78	1.49		1.67	1.59	2.09		2.26	1.39	2.9		3.61	1.45	2.18		2.53	3.93
H3k4me2
H3k4me3	0.44267		0.48313	0.8416	0.51		0.59	1.17	0.88		1.25	1.69	1.11		1.5	2.19	2.34		3.14	2.21	1.27		1.81	4.35
H3k27ac
H3k27me3	0.82699		0.76378	1.01989	1.27		0.87	1.57	1.1		0.87	1.58	1.23		1.03	1.92	2.3		4.21	0.9	3.35		2.21	2.61
H3k36me3	0.42784		0.45224	1.00752	0.9		0.92	1.23	0.53		0.49	1.49	0.66		0.64	1.37	4.06		4.58	1.51	1.03		1.06	3.19
H3k9ac	0.35558		0.39209	1.56636	0.71		0.85	2.27	5.75		6.31	9.62	4.26		4.91	4.76	1.89		2.06	1.76	5.12		5.96	12.95
H3k9me3	1.69445		2.30335	2.86436	2.09		2.44	3.23	2.85		3.21	3.28	3.32		3.61	3.28	0.49		0.37	0.19	4.66		4.26	4.68
H4k20me1
histone modi	mseGlobal				mseGene				mseProm 1k				mseEnh 1k				mseObs				mseImp
IMR90	dHIT2	dHIT	dHIT_R	dHIT_D	dHIT2	dHIT	dHIT_R	dHIT_D	dHIT2	dHIT	dHIT_R	dHIT_D	dHIT2	dHIT	dHIT_R	dHIT_D	dHIT2	dHIT	dHIT_R	dHIT_D	dHIT2	dHIT	dHIT_R	dHIT_D
H3k122ac
H3k4me1	1.20695		1.10564	1.45522	2.39		2.26	1.95	3.12		4.03	3.29	5.56		5.53	1.74	1.26		0.95	0.86	6.34		6.51	5.88
H3k4me2	0.59191		0.52566	0.79449	1.18		1.08	1.17	5.66		5.8	5.12	4.72		4.85	1.98	1.61		1.63	2.29	4.8		4.95	6.53
H3k4me3	0.91796		0.85194	1.07233	1.78		1.63	1.52	2.97		2.97	3.37	7.03		7.02	2.13	1.87		1.96	2.62	4.67		4.74	5.75
H3k27ac	0.71436		0.5988	0.92022	1.58		1.35	1.35	4.93		4.75	4.16	4.93		4.45	2.91	1.6		1.47	3.71	5.47		4.94	7.14
H3k27me3	0.79784		0.88089	1.11318	0.9		0.89	1.67	1.35		1.3	1.92	1.7		1.74	2.43	0.74		1.5	1.01	2.62		2.3	2.96
H3k36me3	0.94143		0.84135	1.11476	2.31		2.11	1.42	1.74		1.85	1.96	3.05		2.53	1.89	0.71		0.81	2.16	4.14		3.68	3.67
H3k9ac	1.10349		0.99189	1.33116	2.22		1.98	1.82	5.05		4.82	4.45	6.16		5.61	2.07	2.32		1.96	1.93	6.07		5.53	7.62
H3k9me3	2.37734		2.57897	2.61285	3.2		3.14	3.09	3.49		3.43	3.41	4.74		4.43	3.52	0.9		0.86	0.78	6.69		5.57	4.3
H4k20me1	1.032		1.02923	1.23141	1.56		1.55	1.34	1.83		1.82	2.31	1.81		1.86	1.89	0.64		0.81	1.25	1.98		2.14	3.09
histone modi	mseGlobal				mseGene				mseProm 1k				mseEnh 1k				mseObs				mseImp
MCF7	dHIT2	dHIT	dHIT_R	dHIT_D	dHIT2	dHIT	dHIT_R	dHIT_D	dHIT2	dHIT	dHIT_R	dHIT_D	dHIT2	dHIT	dHIT_R	dHIT_D	dHIT2	dHIT	dHIT_R	dHIT_D	dHIT2	dHIT	dHIT_R	dHIT_D
H3k122ac
H3k4me1	0.95197		0.90927	1.62948	1.52		1.38	2.14	1.93		3.09	2.05	2.31		2.76	2.49	2.78		3.65	4.79	2.89		3.08	3.72
H3k4me2	0.51667		0.4977	0.95092	0.8		0.75	1.3	1.93		2.29	2.61	2.78		3.01	3.94	3.73		5	5.43	1.93		2.22	4.23
H3k4me3	0.52524		0.52545	0.84167	0.74		0.69	1.05	1.25		1.3	1.55	3.24		3.19	1.23	1.17		1.49	1.52	2.02		2.12	3.69
H3k27ac	0.48469		0.38694	0.86838	0.88		0.61	1.31	6.83		5.1	7.12	5.3		4.34	2.38	2.19		1.71	2.16	7.84		6.02	9.05
H3k27me3	1.17003		1.35332	1.22975	1.28		1.44	1.65	1.4		1.41	1.83	1.61		1.72	2.16	0.61		0.59	0.58	5.56		3.35	4.02
H3k36me3	0.60127		0.54452	1.09875	0.9		0.7	1.16	1.02		0.8	1.54	1.72		1.42	1.52	1.03		1.72	1.39	1.89		1.42	2.84
H3k9ac	0.95943		0.91567	1.49375	1.44		1.24	1.92	2.02		2.41	2.77	3.99		3.6	2.38	2.08		2.68	3.2	3.03		3	5.08
H3k9me3	2.34132		2.51992	2.67878	2.58		2.69	2.8	3.06		3.05	3.13	3.82		3.79	3.03	0.74		0.68	0.7	5.39		4.61	4.32
H4k20me1	1.146		1.2727	1.35932	1.24		1.18	1.39	1.8		1.46	2.61	1.87		1.81	2.08	1.47		2.3	1.73	2.66		1.8	3.23
histone modi	mseGlobal				mseGene				mseProm 1k				mseEnh 1k				mseObs				mseImp
HepG2	dHIT2	dHIT	dHIT_R	dHIT_D	dHIT2	dHIT	dHIT_R	dHIT_D	dHIT2	dHIT	dHIT_R	dHIT_D	dHIT2	dHIT	dHIT_R	dHIT_D	dHIT2	dHIT	dHIT_R	dHIT_D	dHIT2	dHIT	dHIT_R	dHIT_D
H3k122ac
H3k4me1	1.02147		1.86505	1.66813	2.43		4.92	2.24	1.61		3.57	2.54	2.98		4.21	2.95	3.54		3.53	6.55	3.92		5.33	3.64
H3k4me2	0.71756		1.46768	0.6294	1.99		4.17	0.95	4.97		5.21	3.76	4.27		8.21	1.72	2.1		2.1	2.76	6.48		8.83	5.16
H3k4me3	0.97071		1.49368	0.93717	2.46		3.68	1.26	2.51		2.73	2.38	4.54		8.39	1.64	1.79		1.86	2.75	5.21		8.07	4.03
H3k27ac	0.67098		1.50878	0.72502	1.8		4.48	1.02	5.25		7.23	3.13	4.04		7.66	2.51	2.07		2.15	4.77	6.83		9.52	5.45
H3k27me3	0.94584		1.11312	1.14719	1.34		1.28	1.67	0.79		1.19	0.84	1.6		1.66	1.73	0.79		1.65	0.88	3.08		3.05	2.46
H3k36me3	1.03094		1.51725	0.90094	2.97		4.47	1.13	4.18		4.58	1.67	3.59		2.88	1.46	0.88		0.77	1.09	7.36		7	3.04
H3k9ac	1.16172		1.97829	1.25188	2.94		5.13	1.64	4.38		5.58	2.79	5.19		10.14	1.91	2.36		3.01	2.34	6.84		10.52	5.47
H3k9me3	2.87117		3.19865	2.88318	4.55		4.17	3.25	4.99		4.31	3.42	5.47		4.14	3.23	3.56		4.13	3.56	8.96		7.28	4.55
H4k20me1	1.27909		1.93307	1.21622	2.56		4.64	1.48	5.66		6.49	3.03	3.69		4.53	2.13	0.84		1.13	0.67	6.95		6.97	3.58
histone modi	mseGlobal				mseGene				mseProm 1k				mseEnh 1k				mseObs				mseImp
mm10 liver	dHIT2	dHIT	dHIT_R	dHIT_D	dHIT2	dHIT	dHIT_R	dHIT_D	dHIT2	dHIT	dHIT_R	dHIT_D	dHIT2	dHIT	dHIT_R	dHIT_D	dHIT2	dHIT	dHIT_R	dHIT_D	dHIT2	dHIT	dHIT_R	dHIT_D
H3k122ac
H3k4me1	0.19596		0.20063	1.34842	0.31		0.33	1.64	2.75		3.93	2.75	2.28		3	1.73	2.4		2.44	0.37	1.39		1.91	3.4
H3k4me2	0.34809		0.34838	0.77503	0.83		0.83	1.13	4.98		5.64	4.06	5.46		4.92	7.45	15.04		16.69	7.08	6.91		7.87	4.13
H3k4me3	0.28329		0.33725	0.78008	0.49		0.55	1.01	4.37		5.13	3.63	3.7		3.67	4.39	7.04		7.48	3.03	4.5		4.49	3.84
H3k27ac	0.23256		0.18151	0.77616	0.46		0.36	1.1	5.5		3.32	3.46	7.28		4.95	7.96	8.46		7.79	4.88	3.08		3.34	4.08
H3k27me3	0.8367		0.51099	1.6207	1.51		0.82	2.17	2.86		1.47	2.01	2.43		1.53	2.34	3		5.84	2.36	4.17		2.2	2.94
H3k36me3	0.45668		0.47456	0.93219	0.99		0.97	1.1	0.45		0.68	1.35	1.05		1.13	1.47	8.76		8.32	5.3	1.91		2.33	2.43
H3k9ac	0.36393		0.36414	1.05996	0.52		0.46	1.21	3.88		3.47	2.34	3.06		2.33	3.06	4.84		4.24	1.64	2.87		2.61	3.64
H3k9me3	1.9708		2.62572	2.69459	2.01		2.74	2.89	3.11		3.37	3.26	3.15		3.56	3.13	0.3		0.21	0.34	4.52		3.4	3.64
H4k20me1

## Sheet: GE
Predictive performance
		Pearson correlation	Spearman correlation
K562	GSM765387	0.7068	0.8783
	GSM758577	0.6183	0.8573
	GSM765390	0.5821	0.8913
	GSM765392	0.4941	0.8873
	GSM765393	0.6339	0.8779
	GSM765405	0.6455	0.8295
	GSM767844	0.6695	0.8609
	GSM767849	0.5187	0.6614
	GSM840136	0.6021	0.7618
	GSM840137	0.6741	0.7564
GM12878	GSM765386	0.645	0.748
	GSM758559	0.4807	0.7035
	GSM758560	0.6044	0.6498
	GSM758572	0.5412	0.7163
	GSM767852	0.3157	0.5392
	GSM767853	0.3967	0.7
	GSM840138	0.3814	0.4811
	GSM984605	0.3881	0.7919
IMR90	GSM981248	0.6338	0.7256
	GSM981243	0.5968	0.7555
	GSM981244	0.5992	0.4795
	GSM981249	0.6376	0.6399
MCF7	GSM981245	0.4998	0.7524
	GSM765388	0.4917	0.7428
	GSM767851	0.4696	0.679
	GSM981252	0.5204	0.5419
HepG2	GSM758568	0.5464	0.7846
	GSM758567	0.5651	0.7554
	GSM758575	0.5126	0.736
	GSM758576	0.4465	0.5703
	GSM767840	0.3395	0.5441
	GSM767850	0.5807	0.7747
Pairwise RNA-seq correlation
Pearson correlation	GSM765387	GSM765386	GSM981248	GSM981245	GSM758568
GSM765387	1
GSM765386	0.657	1
GSM981248	0.1571	0.211	1
GSM981245	0.3462	0.3261	0.1838	1
GSM758568	0.4838	0.5057	0.2643	0.243	1
Methods comparison
AUC	K562	GM12878	HepG2
AttentiveChrome	0.92	0.9024	0.85	0.8908
DeepChrome	0.92	0.91	0.85	0.893333
EPCOT	0.92		0.84	0.88
TransformerChrome	0.92	0.91	0.85	0.893333
BioSeq2Seq	0.9342	0.9398	0.9405	0.938167
AUPR	K562	GM12878	HepG2
AttentiveChrome	0.84	0.8307	0.58	0.750233
DeepChrome
EPCOT	0.83		0.58	0.705
TransformerChrome	0.86	0.8415	0.5878	0.7631
BioSeq2Seq	0.9364	0.9447	0.9219	0.934333
